# Supplementary material for: Nuclear Magnetic Resonance Fingerprints and Mini DNA Markers for the Authentication of Cinnamon Species Ingredients Used in Food and Natural Health Products
Source: MDPI journal article supplement (doi:10.3390/plants13060841), 2024-03-14
Supplement: s1 [file s1]

**Supplementary Figure S1.** Phylogenetic classification using complete chloroplast genomes for samples in this study and those of related taxa in Genbank

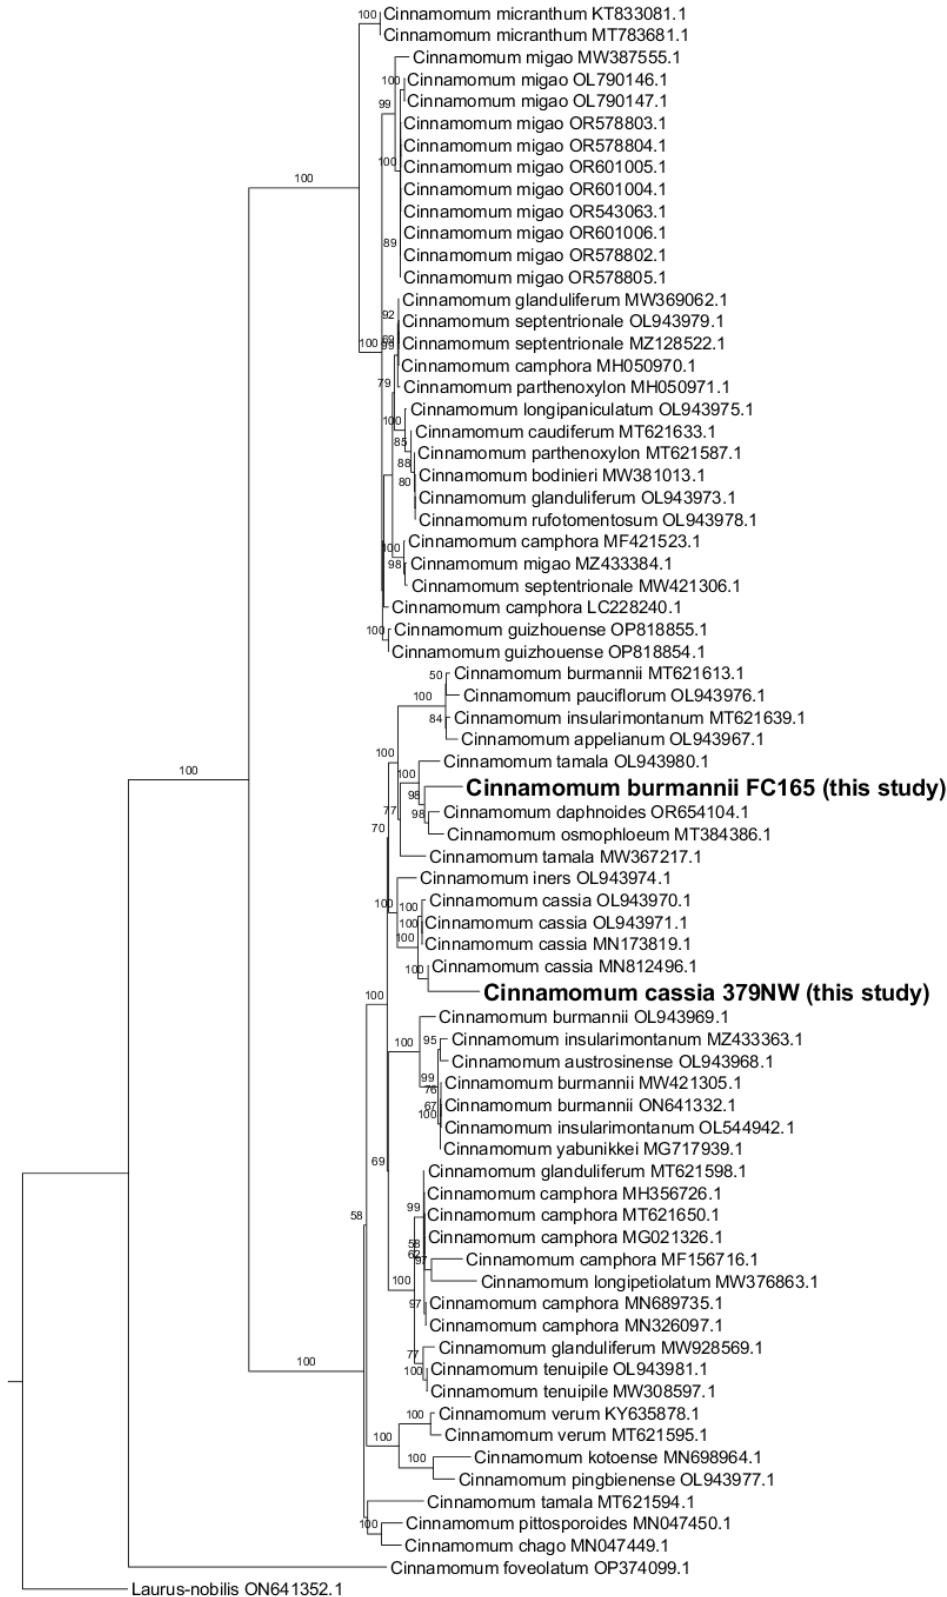

**Supplementary Figure S2.** Phylogenetic classification of samples using the Cincas\_216 mini-DNA marker for samples in this study

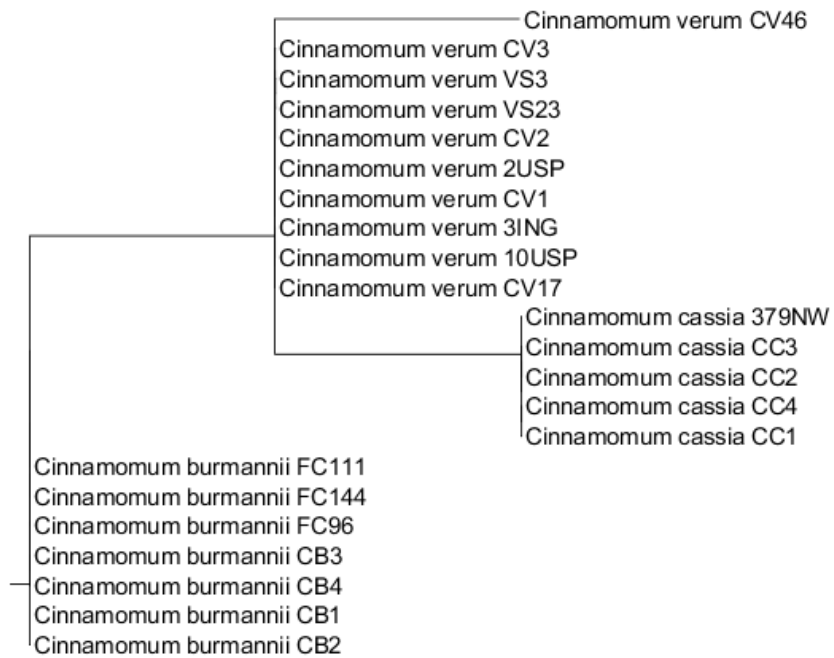

**Supplementary Table S1.** Specimen list and accession numbers

|    | Species                                           | Material    | DNA Accession ID (NMR ID)    |
|----|---------------------------------------------------|-------------|------------------------------|
| 1  | <i>Cinnamomum burmannii</i> (Nees & T.Nees) Blume | leaf        | BRM1531                      |
| 2  | <i>Cinnamomum burmannii</i> (Nees & T.Nees) Blume | leaf        | BRM1532                      |
| 3  | <i>Cinnamomum burmannii</i> (Nees & T.Nees) Blume | leaf        | BRM1533                      |
| 4  | <i>Cinnamomum burmannii</i> (Nees & T.Nees) Blume | leaf        | BRM1534                      |
| 5  | <i>Cinnamomum burmannii</i> (Nees & T.Nees) Blume | bark powder | FC96 ( <i>Cin_burm_30</i> )  |
| 6  | <i>Cinnamomum burmannii</i> (Nees & T.Nees) Blume | bark powder | FC111 ( <i>Cin_burm_33</i> ) |
| 7  | <i>Cinnamomum burmannii</i> (Nees & T.Nees) Blume | bark powder | FC144 ( <i>Cin_burm_32</i> ) |
| 8  | <i>Cinnamomum cassia</i> (L.) J. Presl            | leaf        | BRM1535                      |
| 9  | <i>Cinnamomum cassia</i> (L.) J. Presl            | leaf        | BRM1536                      |
| 10 | <i>Cinnamomum cassia</i> (L.) J. Presl            | leaf        | BRM1537                      |
| 11 | <i>Cinnamomum cassia</i> (L.) J. Presl            | leaf        | BRM1538                      |
| 12 | <i>Cinnamomum cassia</i> (L.) J. Presl            | bark powder | 379NW ( <i>Cin_cass_17</i> ) |
| 13 | <i>Cinnamomum verum</i> J. Presl                  | leaf        | BRM1547                      |
| 14 | <i>Cinnamomum verum</i> J. Presl                  | leaf        | BRM1548                      |
| 15 | <i>Cinnamomum verum</i> J. Presl                  | leaf        | BRM1549                      |
| 16 | <i>Cinnamomum verum</i> J. Presl                  | leaf        | BRM1550                      |
| 17 | <i>Cinnamomum verum</i> J. Presl                  | leaf        | BRM1551                      |
| 18 | <i>Cinnamomum verum</i> J. Presl                  | bark powder | VS3 ( <i>Cin_veru_36</i> )   |
| 19 | <i>Cinnamomum verum</i> J. Presl                  | bark        | VS23                         |
| 20 | <i>Cinnamomum verum</i> J. Presl                  | bark powder | 2USP ( <i>Cin_veru_29</i> )  |
| 21 | <i>Cinnamomum verum</i> J. Presl                  | bark        | 10USP                        |
| 22 | <i>Cinnamomum verum</i> J. Presl                  | bark powder | 3ING ( <i>Cin_veru_47</i> )  |

**Supplementary Table S2.** Specimen list and NMR ID

|    | <b>Species</b>                                    | <b>Material</b> | <b>NMR ID</b>      |
|----|---------------------------------------------------|-----------------|--------------------|
| 1  | <i>Cinnamomum verum</i> J. Presl                  | bark powder     | <i>Cin_veru_01</i> |
| 2  | <i>Cinnamomum verum</i> J. Presl                  | extract         | <i>Cin_veru_02</i> |
| 3  | <i>Cinnamomum verum</i> J. Presl                  | powder          | <i>Cin_veru_03</i> |
| 4  | <i>Cinnamomum cassia</i> (L.) J. Presl            | powder          | <i>Cin_cass_04</i> |
| 5  | <i>Cinnamomum burmannii</i> (Nees & T.Nees) Blume | bark powder     | <i>Cin_burm_05</i> |
| 6  | <i>Cinnamomum cassia</i> (L.) J. Presl            | bark powder     | <i>Cin_cass_06</i> |
| 7  | <i>Cinnamomum cassia</i> (L.) J. Presl            | bark powder     | <i>Cin_cass_07</i> |
| 8  | <i>Cinnamomum verum</i> J. Presl                  | powder          | <i>Cin_veru_08</i> |
| 9  | <i>Cinnamomum burmannii</i> (Nees & T.Nees) Blume | powder          | <i>Cin_burm_09</i> |
| 10 | <i>Cinnamomum verum</i> J. Presl                  | powder          | <i>Cin_veru_10</i> |
| 11 | <i>Cinnamomum cassia</i> (L.) J. Presl            | bark powder     | <i>Cin_cass_11</i> |
| 12 | <i>Cinnamomum cassia</i> (L.) J. Presl            | bark            | <i>Cin_cass_12</i> |
| 13 | <i>Cinnamomum verum</i> J. Presl                  | powder          | <i>Cin_veru_13</i> |
| 14 | <i>Cinnamomum verum</i> J. Presl                  | powder          | <i>Cin_veru_14</i> |
| 15 | <i>Cinnamomum cassia</i> (L.) J. Presl            | bark powder     | <i>Cin_cass_15</i> |
| 16 | <i>Cinnamomum verum</i> J. Presl                  | extract         | <i>Cin_veru_16</i> |
| 17 | <i>Cinnamomum cassia</i> (L.) J. Presl            | bark powder     | <i>Cin_cass_17</i> |
| 18 | <i>Cinnamomum cassia</i> (L.) J. Presl            | powder          | <i>Cin_cass_18</i> |
| 19 | <i>Cinnamomum cassia</i> (L.) J. Presl            | powder          | <i>Cin_cass_19</i> |
| 20 | <i>Cinnamomum cassia</i> (L.) J. Presl            | bark            | <i>Cin_cass_20</i> |
| 21 | <i>Cinnamomum cassia</i> (L.) J. Presl            | bark            | <i>Cin_cass_21</i> |
| 22 | <i>Cinnamomum verum</i> J. Presl                  | extract         | <i>Cin_veru_22</i> |
| 23 | <i>Cinnamomum verum</i> J. Presl                  | extract         | <i>Cin_veru_23</i> |
| 24 | <i>Cinnamomum verum</i> J. Presl                  | powder          | <i>Cin_veru_24</i> |
| 25 | <i>Cinnamomum verum</i> J. Presl                  | powder          | <i>Cin_veru_25</i> |
| 26 | <i>Cinnamomum verum</i> J. Presl                  | powder          | <i>Cin_veru_26</i> |
| 27 | <i>Cinnamomum verum</i> J. Presl                  | powder          | <i>Cin_veru_27</i> |
| 28 | <i>Cinnamomum verum</i> J. Presl                  | powder          | <i>Cin_veru_28</i> |
| 29 | <i>Cinnamomum verum</i> J. Presl                  | bark powder     | <i>Cin_veru_29</i> |
| 30 | <i>Cinnamomum burmannii</i> (Nees & T.Nees) Blume | bark powder     | <i>Cin_burm_30</i> |
| 31 | <i>Cinnamomum burmannii</i> (Nees & T.Nees) Blume | bark powder     | <i>Cin_burm_31</i> |
| 32 | <i>Cinnamomum burmannii</i> (Nees & T.Nees) Blume | bark powder     | <i>Cin_burm_32</i> |
| 33 | <i>Cinnamomum burmannii</i> (Nees & T.Nees) Blume | bark powder     | <i>Cin_burm_33</i> |
| 34 | <i>Cinnamomum burmannii</i> (Nees & T.Nees) Blume | bark powder     | <i>Cin_burm_34</i> |
| 35 | <i>Cinnamomum verum</i> J. Presl                  | powder          | <i>Cin_veru_35</i> |
| 36 | <i>Cinnamomum verum</i> J. Presl                  | bark powder     | <i>Cin_veru_36</i> |
| 37 | <i>Cinnamomum verum</i> J. Presl                  | powder          | <i>Cin_veru_37</i> |
| 38 | <i>Cinnamomum verum</i> J. Presl                  | extract         | <i>Cin_veru_38</i> |
| 39 | <i>Cinnamomum verum</i> J. Presl                  | bark powder     | <i>Cin_veru_39</i> |
| 40 | <i>Cinnamomum cassia</i> (L.) J. Presl            | bark powder     | <i>Cin_cass_40</i> |
| 41 | <i>Cinnamomum verum</i> J. Presl                  | powder          | <i>Cin_veru_41</i> |
| 42 | <i>Cinnamomum verum</i> J. Presl                  | extract         | <i>Cin_veru_42</i> |
| 43 | <i>Cinnamomum verum</i> J. Presl                  | extract         | <i>Cin_veru_43</i> |
| 44 | <i>Cinnamomum verum</i> J. Presl                  | extract         | <i>Cin_veru_44</i> |
| 45 | <i>Cinnamomum verum</i> J. Presl                  | powder          | <i>Cin_veru_45</i> |

|    |                                  |             |                    |
|----|----------------------------------|-------------|--------------------|
| 46 | <i>Cinnamomum verum</i> J. Presl | powder      | <i>Cin_veru_46</i> |
| 47 | <i>Cinnamomum verum</i> J. Presl | bark powder | <i>Cin_veru_47</i> |
| 48 | <i>Cinnamomum verum</i> J. Presl | extract     | <i>Cin_veru_48</i> |

**Supplementary Table S3.** Genomic region locations for *C. burmannii* and *C. cassia*

|                     | LSC (bp) | IRb (bp)     | SSC (bp)      | IRa (bp)      |
|---------------------|----------|--------------|---------------|---------------|
| <i>C. burmannii</i> | 1–93704  | 93705–113778 | 113779–132690 | 132691–152764 |
| <i>C. cassia</i>    | 1–93684  | 93685–113750 | 113751–132658 | 132659–152724 |

**Supplementary Table S4.** FC165\_C\_burmannii\_full length chloroplast genome

TTATAGGGATAGCGAATGCTGGGCGAACGACGGGAATTGAACCCGCGCATGGTGGATTCA  
CAATCCACTGCCTTGATCCACTTGGCTACATCCGCCCTCCTCTCTCAAAGGATTCCAT  
TTTCACCATTTCATTATTTTGTGATTTAGTCTTTATTACTTCACTCTCCTTCTGCTGAAA  
TACAGATATTGTACATAAAACAAAATGTTGTACGTAAAAAATGCT  
TTGATTTTTTCAAAAATAAAATTTTGAAGAATAAGAGGATATAAAATGCAGGTTGG  
TACAGAAGAACTACGATATTTCGATCATGAAATAACCAGCGGTTTTTCATAAGTTGAATAA  
AAGAAATGAAATGAAAACGATTATGTGAATAAAACACTACTGAACCAAATGGATCAAT  
ACCAAATCTCTTGTCTATTAAGAAGTTTGGTATTGATCCTTCAACGACTCGTATACACT  
AATACCAAAGTATTATCCGTTTGTAGATGGAACCTCGACAGCAGCTAGGTCTAGAGGGAA  
GTTGTGAGCATTACGTTTCATGCATAACTTCCATACCAAGGTTAGCAGGATTGATGATATC  
AGCCCAAGTGTTAATAACACGACCTTGACTGTCAACTACAGATTGGTTGAAATGAAACC  
ATTTAGGTTGAAAGCCATGGTGCTGATACCTAAAGCAGTAAACCAGATACCTACTACAGG  
CCAAGCTGCTAGGAAGAAATGTAAGGAACGGGAGTTGTTAAACTAGCATATTGGAAGAT  
CAATCGGCCAAAATAACCATGAGCAGCTACGATATTGTAAGTTTCTTCTCTTGACCGAA  
TCTGTAACCTGCATTAGCAGATTCAATTTTCAGTGGTTTCCCTGATCAAACCTAGAGGTTAC  
CAAGGAACCATGATAGCACTGAATAGGGAGCCGCCGAATACACGACTACGCTAACAT  
GTGAAATGGATGCATAAGGATATTGTGCTCTGCCTGGAATACAATCATGAAGTTGAAAGT  
ACCAGATATTCTAAAGGCATACCATCAGAAAACTTCTTGACCAATAGGGTAGATCAA  
GAAAACAGCAGTAGCTGCTGCAACAGGAGCTGAATATGCAACAGCAATCCAAGGGCGCAT  
ACCCAGACGGAACTAAGTTCCTTCCATTACGACCCATGTAACAGCTACACCAAGTAAGAA  
GTGTAGAACAATTAGCTCATAAGGACCACCATTGTATAACCATTCATCAACGGATGCTGC  
TTCCCATATTGGGTAAATGCAACCTATAGCTGCAGAAGTGGGAATAATGGCACCGGA  
AATAATATTGTTTCCATAAAGTAGAGACCCAGAAACAGGTTTACGAATACCATCAATATC  
TACTGGGGGAGCAGCAATGAAGGCAATAATAAATACAGAAGTTGCGGTCAATAAGGTAGG  
GATCATCAAAACACCGAACCATCCAATATAAAGACGGTTTTTCAGTGCTGGTTATCCAGTT  
ACAGAAGCGACCCCATAGGCTTGTGCTTTCGCGTCTCTCTAAAATTGCAGTCATGGTAAA  
ATCTTGGTTTATTCAATTCTCAGGGACTCCCAAGCACACAGATTATCTATAAATAGAAAT  
AGACAACGGAAGGCTTGTATTCAACAGTATAACATGACTTATATGTCCGTGTCAACCAA  
TAAGAGAGATATCTATCTGGATAGATCCATCCGAACGATTGTAAATTAAATGAGTAGGG  
ATTTATCCAATAACAAATATTTTTCGTATTTTCCGTACGATTGGTAAATGGGTGCCCCG  
GACTCGAACCCGGAACAGTTCGGATGGAGTAGATAATTTCTTCTTGCAATATAATAGAT  
ATAGAGTAAAAAGACCCCCAAAAAGCCGTGCTTGCATTTTTTCAGTGCACAGGGCTTTA  
CCTATGTATACATCCAAACTAAGTTTCCCTAAAAGGGGACCTAAGAAGCTTGAAGACTCA  
GTTGATTCAACCACTACTGTATGAACATTTTCAAGTTTCAATGAATAAAATGATTTTGTG  
ATTTTATCTCTTCATCATTTAGGGATCCTTTCTATTTACATGACCTCATGACCAATCATA  
AATGACTGACTAGGTCTATGATACGGATAATATCCAATACCAATCCGTTCTCTATGTG  
ACCTATGAGAAGGAGAAGAGGTTGTTGGGAAGATCAAGAAAGAGCTTGTCTTCTCCG  
TAAAGAATTCTTCCAAAGAACTCCGAACCTAATCTTTTCAAAAAGCAGTATCGTACTTT  
TATGTTTACGAGACAAAGTTCTAGCACATGAAAGTCGAAGTATATACTTTATACGATACA  
AACTCTGTTTTTTTGGAGATCCACTGTGATAATGAGAAAGATTCTGCATATCCGCCCAA  
ATCGATTGAGAATCTCAGAATCTGACAAATCGGCCGAAACGGCTTACTAATGGGATGCC

CTGATACATTACAAAATTTTGCTTTAGCCAATGATCCAATCAGAGGAATAATTGGGACTA  
CGGTCTCGAATTTCTTAATAGCAGTATCTATTTCGAAACGAATTTCTCTAGCATTTGACTCC  
TTATCACCGAAGAGTTTAGTCGTACACTGAAAGATAGCCCAGAAAATAGAAGGGATGAT  
TATATAATTGCTTTTATATGGATCCTGGCCGGTTGAGACCACAAGTCAAAATGACATTGCC  
AAAAGTTGACAAGGTGAGATTTCCATTTCTTTATCAGAAGACGAGTCCCCCTGAAGCCA  
GAATCGATTTTCCCTTGATATCTGACATAATGCATAAAAGGGTCTTTGAACAACCATAGGG  
TTTCTCGAAAATCGTTACAAAGCACTACTACAGATATTTATTTTTGCATAGAAATGTG  
TTCGCTCAAGAAAGGATCCAAAAGATTTTGATCGTAAATGAAAGGGTGTGTTACGGAGAA  
AAATGAATATGAATTCACATTATATACATGAGAATTAGAGAGGAACAAGAAGATCTTT  
GATTTCTTTTTGAAAAAGGGAAATGGAATTTTTTGGAGTAATGAGACTATTTGAATTC  
AATACTCGTAGAGAGAGAATCGCAATAAATGCAACGAAGGAGTATCTTGATCCAAGAGT  
GAAGGGTTTGAACCAAGATTTCCAGATGGATGGGGTGGGGTATTAGTATATCTGACACAT  
GATTTAAATGTGATACTTGTCTCGAAAAAGGAAATATTGAATGAATAGATCGTAAAT  
TATGAGATTTTGCTATTTCTTTTCTTCTAGGGAAGATACCAATCGCAGCGAGAATGGAA  
TTTCCACAACGACTGCAAAACCCCTCCGATATCATTTGAGAATCAAAATGATTGTTGTGCC  
CAACGAATCGATTTTGATTAGAATCATTAACCGAAATAATCAAACGATTCTGTTGATGCA  
TTCGAGTAATTAACGTTTCACAATTAGTGAACCTGGATTTATTGTCATGATCTAAATTTT  
CCACCGGTTTCATAAAGATCGATCCATTTAAAGCATGACCATGAGCAGCGCGTAGATAT  
ATTCTGAAATAGAAACGGATATAGGAAGTATTGTTGCCGAAATCCATCCATTTCTAAAT  
ATCCTTGAGTTAGTTTCCCTCCATTTCCATTTGAAATTACACTGAACCAATGGGGGATTTCTT  
GAGTTATCAAATAATACATAGTACGATACGGTCAGAACAAGGTATATAGTAAGAAAAGAA  
TAGATACCCCGGAGCCAGAAAGGACAATCAACGGATCCTATTTCCATCCAATTTATTTAT  
GTCGTTATAGTTACAAGAGATGGTTAGAAATCCTTTATTTTTACAACCCGATCACTCTT  
TTGACTTTGGAATAATGAATTTTGATCAGTATACCGGTTCTTCTACACATTCGTCTCCAC  
TACATAATAGAGAACAATAATAGAGAATAGTTAGGATTCATTAACCAATGGGAAATGATGA  
TCCACTCACAAGAGAACCCTTTCCCATCAGGCACATAATATTTTTTAACGTCATAATTA  
GATCGGGTAATCATTCGAATTAAGAACAACAGAAGCTCGTTGCTTTTGGTTTCCCTATA  
ATTGGAGCTATAGGGCTCTATCCATTTATTCACGACCCAACTTGAATTGATTTGACCC  
CTTTCCAGAAAAGAATCAAAACAAGATTTTGATCGATCCGTTAAGGATGAAGTATTTCT  
AAGAGTTCTCCATTGATACGACATGCTGTTTTTCTTTTCATTCCCTTTCAGGATCAGTC  
GTGGTCTTACAACTCCACCAATGGTATGGACGAATCCGTTGCTTCATCAAAATGTGTAA  
AAGACCATAGCCGCACTTAAAGCCGAGTACTCTACCGTTGAGTTAGCAACCCATATAAA  
TAGGGTGTGTAGATACGATCGGAATAAAAAATAAATAAAGAGATTCGATTGCCCGACCTC  
GTCAAAACATTGAACATAGCAACAGATCAAAAAGAAAGATTTGATGATCAATTGTGAACAT  
AAAAATGAACAGAGATCAGATGAAAATACAACAGATTTCTGGGATAAATATAGAGAAAAT  
CTAAATAGATGTAAAAATGTAGACTACCCATACTCTATTTTTTTTTTTTTTTCATTATA  
TTAACTAAGATACTTCTGTGTGCACAACGAAATTGACGAACCCATCGTTTGAGTGAAATA  
AAGAAACAACTTATGAATGTGGATAAATAGATCTATTTATCCACGATCGAATTATATT  
TGTTTCGATACACCATTGCAATATGAATTGAATGTTGAGAAAACCAATTCAATTTCAATA  
AATAAAACAAGGACTTGTGTTGGAGTGACACTACAACATAGATAAGGGATGAAGTATGAG  
TGGGGAATAAATAAGGAATTCGGGTAGGAAAAAATGTCGGGTTTATTCATATTTTATT  
CAATAGAGGTACAATTCAAGCAAGATTGACCTTTGTTTTGTTGGTGAGTCCCAACGAAAC  
CATCTGATTGATGGTAATCCCATAAATTTCCAGTTATTTTCATCTATTCACCTCAATCTTTT  
TTCTATCTGTCTCATATCAAGAGAAGATATTTTTTTTTTATAGTTCTATGATACGGGGTC  
ATGTGAGAGCAACAATGAATAGAGAATAGAGAAAAAATAAGGAATGGTGGAGAAACAA  
TTAGACAAAGCTAGATACTGGCCCCCCCCCTTTTTTTTTTATTTTCATTAATTTTCATTGATT  
AATTCGAAATTCCTTAAATACCTCCGCCTTCTTGAAATATCATGAACAGTTCTCTGTAGG  
TTGAGCGCTTTTTCAAGGAAATATAGAATAGCGGAAACATTTGAATAAGTTTGGTTCTT  
TATCGGATCGTAAAAACCCACTTTACGAAGATCTCTTCCCTCTCTTCGGGATCGAACATC  
AATTGCAACGATTCGATAGATGACTCATTTGGGATAGACATAAATGAACAACCCCCCTAG  
AAACGTATAAGAGGTTTTCTCTCGTACGGCTCGAAAAAGAATGATTTCGAATTTATGTAT  
TGTAAGTGGCAATAGATCCACAAAATCATCAATTAGACTATGATTTGAGTCATTTTTTTT  
TGTTCTTCCCTTCCGTAAGAAAAAAGAAATCTCATTCGTAATCATAACTCAAG  
TTGGGTAAATCTCAAAGAGCTCGAAGGGAAATCCTTAGACATTTATTGAGCCGTCTCTAA  
CCTCTTTTGTGTTGCTCGCTTAGAATCGATTTGATTTCTTCCCATTTCTGATCTAGTTGT  
TGAGACAAATTGAAAACGGTGTTCCTTGTTCGGGTATCCTTTATTTATCTTTGCTTTGA  
ATCCTTGGGTTTAGACATTACTTCGGTGATCCTTAATTGTTTCAAAATGGTAGCAACATA  
CCTTTGTTATTTCTGTTTATGGAACGATTGATTCCCTGTGATACACTTTTGATCGGA  
ATTGGTAAACTATTTTCGACAAATTCATTTTACTTTTTTTTTTACTTGTTCGAACCTG  
ATCCTTTCAATTTCTATACCGAAGATATACTTACGAAGTTGTTCCAATTTATGATTGGC  
ATTAACCCTAGATCCTTCTCTGCTAAATGAACCAATCTTTATGCTCGAGCTCCATCA  
TGTGCTATATTATAATTATATTTTATTACAACCCCAAACTGGGGTCCTAGTGGAAAT  
AGAACAAACTATGTCGAGCCGAGAGCATCTTCTTTGATATATAAATGGTGGGTACAAGA  
ATCCACAGCCAATAATGTCCTTCAAGTCGCACGTTGCTTTCTACCACATCGTTTCAACG  
AAGTTTTACCATAACATTTCTCTAATTTTGGACCGGTATGGAATTGATTCAATATGGAAT  
CATGAATAGTCATTGGCTCAATCGGTATATAGTATATGAAGTCTCCATACTTTCATTTT

CATATATGGATCTGGAGAAGTCTCAGCAAGAATATAATTTAACCCCATATTTTATTAGAA  
GAATGAAACACATTTATAAAAAACACGAAGAATGCGTTGCTTAACACTTCTTTACATCT  
TCAACAGATTGTTAGGGATGATGAATCATGAAAGATCCAATTCTTTCTCAAACAACTAAA  
ACTAAAGAAGGGTCTAGATTACCGATACCGGAACAGAATGAGTCATTAAACCAATAAGCT  
ATTCCAATGACCGGGAAGATCGCAAGTGACTCGATAGGATAGATTACCAATGTACAC  
TTCTTCGAGGAGAAAGATTTATAAGGAATCATAAAAAACAATTTCAAGAATTTCCCTACT  
TCGACATCATTACTGGAATAAGTTTTCCAGTAAAGACTGAATTGAATCTCTAAATCCAT  
CAACAAGTCGGTACAACGAGGATCTAAAAATGTTTAGCAGATATCTGATTAATTAAATCA  
GACGCGAATTTGATCATCATATAAGAGACCTCTATGTTTCCCTTTCCGATTGAATCATCAATA  
ATTTAAACCAGATAAATGGGTCAAGAACAATCCAATTGTTTTGTTTTCTTGGGGATGG  
ATAGAAGGGGCTCATGAAAGAAAAGATTAAGGTCGGTATTCTTTCAAGTATTCTTTTCATC  
TGATTGATAAAATCAGAATCGTAGGAGTCTGATTTTATCGTATTCATCAGATACACCAAAA  
CAAGTGTTACCGGGGTAATCGTGGGTATTTAAGGGATCGCAGATCTTTTTCGCCAAAAC  
TGAAACACCGGTGCTACTGATCACTGAAATAGAACAAATAACAATATATATAGGCATGGTT  
CATTTTCTACAGATTTTTCCCTTACTTCAGATTCAAGGATCTTTCCATAAAGTAAAAATGAG  
TGTATGAATCTCCCCCTCCCCAATTGATCGCTACATTGATTTCGAATTATTCATTGGA  
GCCAATCAAATACAAAATAAAAGAAATTAGGTCCAAAGAAAATAATCCGTTCCGTATG  
AATTTTCTGTTTGTAAATAAGATCCGGATGACAAGGGTCTTGAAATTGATACCTTCCTT  
TCCTTTGCGGATTAACATCATATCGACACGAATTCATGGGGATCATGAATCATACCCAAA  
GCCAATTTAAAGGATCTCTTATGGGATGCTATCCTGTCTTGATATAAGTACAAAGCAAA  
ATGGGTTTCATATCAATTCGTTGTACTATTTTGTGTTGATTTTGTCCCAACCCAGTCTCAG  
GAGCTTTAATTCAGCGATGGAATTAATACCAAGAACCCCCCGTTTTTTAGGATTCAGG  
ATCCACATAGAAATAGTCATTTTGTCTACCTATCTTTATTTATATTACTTTAGGGAAA  
GTAGAGACTTCTCTTTATTTTCGCATTTTCGACTCAGAATGCATCATGTGAGAATCCAAAT  
ATCATAGATATGGGCGATAAAGTTTATCCAAATGACTAACTAACCTTCAATATGAATATG  
GGCGAGGAGGCCAACAATACGCTGAATGGCCACCCAGTTTTTTTTTTTGAATTTCACTT  
TGATCTTTGTTCCCATCTACCTATATCAAAAAAGATATTTATTTCCATCCACATGTCAT  
TGATACTCGATCCGTTTGTGTTGAGAAACAAAATCGAAAGGGAAGATATGATTCTATAG  
AAGAATCATTAGAAATCACAAGAAAGATTGGATCACAATTGTATCCAACATTACACCCCTT  
AAACAGAAGATTGTTAAAAAGAACATCTTTGTTATGATAGAATTGGTCTGGGACGGAAG  
GATTCGAACCTCCGAGATTAACGGGACCAAAACCCGTTGCCTTACCACTTGGCCACGCCCA  
TTTTTATTTCTATTTCGGCACCAATAAACACTAATATCGGTATTGGTTGTTTCGTCAATTCC  
AGCCCCAATATCTATTGAATTGGTTGTTGCTATGATTCTACACATGTAGATGTAGAATCA  
AAATGAATTTATGATCATTACATATAATTCAATTAAGATATTGTATGTAAGGTATGATT  
CCTTCTATTCTCATTGAGAATTGAAGGATTTTTGATTGAGGGAGTTCAAAGAAAAAGAA  
AGATTTTGCGGCTACTTTCCCTTCTTCTTCATTTTCCCTTATATCAATAACCCAATA  
ATAATGAAATTTTCTCCAAGAACAAAATGTTTGTATGCTTAATATCTTTAGTTTGATCT  
GTCTTAATTCTGCCCTTCATTTCGAGTAGCTTTTTCTTCGCCAAATTGCCGAAGCTTATG  
CTTTTTTCAATCCAATCGTAGATGTTATGCCAGTCATACCTGTGCTCTTTTTTCTCTTAG  
CCCTTGTTTGGCAAGCTGCTGTAAGTTTTCGATGAGATCTTTAATACTGTCTTAGAAACA  
TTCATGATTTATTCGATAAAAAAAATTCATTTCTTAAGAATTGATAAGATCAGATAATG  
AACCTTCGACTCAAACTGGAATTCCTTTGGATAACCGAGATGAATCGGAATCACCTCA  
TTTCTTCATTCTCTGGGGTTCGAAGACCTATGTATGGTCCCTACAATACCTAATTGT  
AGGTATGAGAGATCATTTTGTTAACGAAAGAATCAGAATCTTATTACAATGCATTCCGT  
CAAATTCCTTATGTTTTCTAGAAACCGCTTCTTTCTTGGTGTCAAACGGAATATGTGG  
TACAAAAATGGAGAATCTATTTCCCTATTTCCCCCAAATGATCTTGAGATTGTGTAAT  
GCTTACTCTCAAACTCTTCGTTTACACAGTAGTGATATCTTTGTTTCTCTTTCATCTT  
CGGATTCCTATCTAATGATCCAGGACGTAATCCTGGACGTGATGAATAAAAAAATCAGGG  
GTTTTTCTTGTCTGATTTCTGAATTTTCTTAGGATTTTCTTCTCCATTCCATACATTT  
AACTATGAGAAAGGGGGTTAGAGATTTTTTCGAATTCGAAAGGGAAATATCAAGTGATCA  
GAAGAAACGGAGAGAGGGGGATTTCGAACCTCGGTACAAATAATTCTGACACGGATTAG  
CAATCCGCGCTTTAGTCCACTCAGCCATCTCTCCCATTTTAAATGGATAATTCATATG  
TGACGCGTGAAGTAAAGGTTGATAAAAGTTTTTCCTTATCTTTCTTATTCTATAAATAT  
AGACGAATTTGATCAATCATCAATTCCTTTAGATAATGATTGAAACAGATATCTCCAA  
TAGAAAGAGTACCTCTTTGATTTTCGTCCGAAAAGTTCTTTCTTTTATTCCCCCGCCTGG  
CCAGTACCTAGCCAGGCCATTCTTGTTCGAATGAATCATAGATCAATGATTTATTTGA  
TTTGAAAACGAAAATGCTTGTATTGAAGCAGCAACAAGGCTATTTCCATTCCATGATA  
GGAGTGTCTGTTTTGTTATATGTTTTCTTTTTCTCGATTTACTTAAATGGAATAAAAAAA  
ACATATTTTTTCTATTATAATAGAACTCATATATTTCTTCAAAGACATGTTTGAACCT  
GAACCTTGTAGTCCACAACCAAAACAATAGGATTTTCACTCGATCCAATCGACCCGAAT  
TCATAAGATTTGGCAGTTGAATGAATAGGAAAGGAGTAGCTTCGAAAAGAAAAATGGA  
GCTCTGGATTCTGTACAACCTCAACTCATTTTTATGTTCCGACTTCAATGGCTCTTTCCG  
GCCGGGACTATCAGTAACGGTCCCCGATAAAAGCTTGTATTGAAATGAACCTCCTTCT  
CCTATTTTATCAAGTCTCCCCGTCAGAGCACACATGTCAGCACCCCAATTTTCATGATT  
CTGATCCTATCTTGATTACGTTTACGCCCCTTGTCGACAAATGGCCCGCTCGTATACAA  
TAATTATATTGTAGCGGTATAGTTTAGTGGTAAAAGTGTGATTGTTCTATTAAACAAGT

GAAATAGATAAGGGATCTTTCGTTTGATTCCCTATTCTGATCAAAAACCTTATTTATTAA  
AGGGCATTAATCCCTTACCTCTCAATGCCACATTTGAGGAAGAATATACATTCTCGTGAT  
TTGTATCCAAAAGTCAAGTCAATTAGAAATTGACTAACAAAATTGGATTATGAATTGCG  
AAGCATAAATTTTTTTTTTTTGAAGTTGGATCAACCATTCCAATTGAATGAGTATAAGTAA  
GGGATCCATGTATGAAGATACAAAAGTCTATTTCTAATCGTAACTAGATCTTCCATTTTT  
TTTTTTTAGGGGAGATTGAAGCCAATAGCTATTAACGATGACTTTGGTTTACTAGAG  
CCATCGACATATGTTCAGCTCGGTGGAACAAAAAATTCTTTCTTCAGGATTCTTGC  
AAGTACAAATAGGGAACGAAGTAACTAGAAAGATTTGTGAGAATCCTCCTCTTCTAGAG  
GGATCATCTAAAAAGCAAGTCATTTGGGGTGCATTGACACGAAAAGGCTGACATAGATGT  
TATGGGGCAAATTGATTTCTTTGAATTCAGATTTGCTATGACTCCCTTTTCCCATACATC  
GTAAATTTTTTAGTTTTTTTTTATGTCTTAGATTGGAATCCCATAAAGGAGCCGAATGA  
AACCAAAATTTTCATGTTTCGGTTTTGAATTAGAGACGTTAAAAATGATGAATCGACGTCTA  
CTATAACCCCTAGCCTTCCAAGCTAACGATGCGGGTTCGATTCCCGCTATCCGCTTCATA  
TTAATTATTATAATACATGCTTTTGATATGTCCTTAAATCTTTCTTTCACATACAATCC  
TATTCCTTTTTTTTTTATAGGAGATAGGAAAGTCAGAACGTGAAGAAATCGGAATGAAAAG  
CGTCCATTGTCTAATGGATAGGACAGAGGTCTTCTAAACCTTTGGTATAGGTTCAAATCC  
TATTGGACGCAATTTATTTCCATCTATTTTGTAGATTGCTATGTCAAGAACATATTTT  
GAATGATTCGAATCGGGGCCATTTCTCAACGATTCGCTTGTACTTAAAGGTGATCAATT  
TCTTTATTTTTGTTCTGAAGTAGAAACAGTTCTATCTGTTCCGGAATAGCTTCCTTCAA  
AAGGGCTTCGGCTTCGGCGGTAAATGTCTTGGTAGAAGATATGATTTCTTGGACCTGAGG  
TTTATTTGTTTTTAAGTAGGTACGTAACGAACGAGAAATTTCTTTACCTGTCCAATTTT  
TAACGGATCAAGATACCCATTGCTCCAGTATAAATAGTAACATCTGTCTTCCACCGT  
GAGAGGGGCTGATTGGGATTGTTTGAAGCAACTCGCGCAATCGTTGACCTCTTGCCAATG  
ATTCTGAGTGGCTTTATCGAGATCAGAAGCGAATTGTGCAAGGCTTCTAATCTGCGAA  
TTGAGCCAGTTCAGTTTCGATTGCGGGTACTTGTTCATGGCTTTAATTGAGCTGC  
AGATCCTACTCTCGAGACAGAAATACCCACATTAATGGCAGGACGGATTCCGGCATTGAA  
TAGATCAGCGGATAAGAATATTTGTCCATCTGTAATGGAAATCACATTAGTAGGGATATA  
AGCCGAAACGTCCCAGATTGAGTCTCAACTATTGGTAAAGCGGTCACTTCTCTTACC  
TAAACGAGAACTTGATTTAGCGGCTCTTTCAAAAGGCGTGAATGCAATAAAAAACATC  
TCCTGGATAAGCTTCGGGCCGGGCGGTCTTCTTAATAGAAGAGACATTTGACGATAAGC  
TTGTGCTTGTTTGGAGAGATCATATAAATTATTGAAGTATGTCGTTACGGTACATAAA  
ATATTCAGCCAGAGCCGCTCCTGTATAAGGAGCGAGGTATTGTAATGTAGCAGGTGAATC  
CGCCGTTTCGGCTACCACAATAGTGTATTCATTGCCCTCGTTTCTGGAAAGTGGTCAC  
TACCTGGGCCACGGAGGATGCTTTTTGACCAATAGCTACATAAACACATATTACATTTG  
CCCCTTTTGGTTGAGAATAGTATCTGTGGCTACTGCTGTTTTTCCGGTCTGTCTGTCCCC  
AATAATTAATCTCGCTGACCGGCTCCTATAGGGATCATCGAATCAATAGCAATAAGTCC  
CGTTTGAGAGGGCTCATATACGGAACGTCTCGAAATAATACCTGGAGCAGGAGATTGAT  
TAACCGAGATTGAGAAGTGAATTTACCTCTCCCATCAATGGGTTTAGCCAGAGCATT  
TATAACACGACCCAAATAGCCCTCACTAACGGGTATCTGAGCAATTCTTCTGTTGCTTT  
TACAGAACTTCCCTCTTGTATCATCAAACCGTCACCCATTAATACAACGCCAACATTATT  
TGATTCCAATTCAGAGCAATGCCTATTGTACCCTCTTCAAATCTACTAATTCCTTGC  
CATTACTTCATCAAGACCATGAATACGAGCAATGCCGTCGCTTACCTGAAGTACTGTGCC  
GGTATTACAATCTTGACTTCTCTATTATATTGTTCAATACGTTACCGGATAATATTACT  
AATTCGTGCGCTCGAATGGTTACCATTAGTGTCTCTTAATCTTTTTTCGGAACAAAGA  
AAAAAAAAAAAAAAAAATAATGCCACAGTAGAAGGGCTAATCAGTTACTTCTTTATG  
GCCCCGAGCATGCCAATATTAGCACCAGTGGTGCCTAAATGTAACGCTGTTTGAACAA  
CTATTGAGAGTTCCAGAGTCTCTTGTAAAGGCTGTTGGAAACTCGTTGTCGACCTGA  
TTAATTGCTCTTTGTTGTTCAAATGAATGGTTTCATTTTGTAAATTTCTAATCGTTCC  
AAATTCCTCATAAGTGGCATTAAATCAAATTCATTTTTCTCGTTCTATCTCAGAGTATCCA  
TTCACTCGAAACTCATCTGCTTCTATTTCACCTTTCGTAAGCGAGCCCGGGCTTCTTCG  
AGCTGCTCAATGGCTCCTTCACGTAGTTCTTCTGAATTTGCAATAGTACTCAAGATCCTC  
TGTTTTCGATTATCTAATAAATCACTTAATGAAAGTAGATTATCTTCCCATTCATTTAC  
AACTTCATTTCCATGATCTCTTCCCGAACCAACATGAATCTTTCGATTCAATTGGCTCT  
CACACTCAGTTACTTAATGGGTCAATCCATCTATTTAATGTAATGAGCCTACCCCTCTCT  
TCTCTGTTTCGTATTCCAAGATATCAAACTGATACGAGACCAGAATATTCGGAGGACTCT  
TCCGACCCGACAAAAATCTGTCTATTGTCAGCAAAGTTGTTTCTTTTTTTTTGTTTTT  
TTCAAATCCAAAAATCTTCTTATTTTAGACATAGGTCATCGATTCAACATTGGATAAA  
AAAGGGCGAGACACCCATTTTACAGTAAATGGTTCAAATCATTTTATCGATATGAGTGT  
TCTATATCGGATAAATTGCCAACATTCATTTTTTTCGAAACCATCTCCGTACTAACGTAG  
TGGTAGAAAGAGTACCATTGTTGCTGACTTCAAACGGTTTCGTTTAAACCATGTTAA  
AGTCCCACATATTGGCTGATAGAGAATCAAAGTTGATTTACCAATAAATTACGAAATG  
CTATGGTTCTTACATATGATTTCTTAATTTATTCAGAAGTAATTCGTCGAGATCGTGCAC  
CTTCTTTCTCTATTATAACTTTCCCATTCAAAAAAGGAAAGTGCAGCCGGT  
TGGATCCAGCCTATTCTTGAAATACACAACCTCGCACACACTCCCTTTCCAAAAAGATCA  
ATACACCAAGCACTACACTTAGATTTATTAGATTTGTTGCTAAATATCGGTATTAAACC  
CGAACTCCCAGCGGATGGCCAGTGACCAAAGGAAACGAAAGAATCGGTTACATCTCTCA

TATGCTTTTCTCTTATAGATAGGACCAACAAAATGGAACAGAGTTCCTTTTGTATCACTT  
CGCCCCCTTTGTTTTGGATTGATTTCTTTTTATTAAATTTCCTTATTATAAATATGAATAG  
ATTCATTTTAAAGAAATATTTTCTTTATTATTATTTCCATGGAAATTCCTCAATAATCTAT  
TTATTTAGTCCCAGGTTTCATGTCAATTACGAAATACCTCGTTTGTTGCAACACTTCCTA  
AAAGTAAAAAAGAGTTTCCATTAAAGAACGGAAGGGAAGAAAGCAAGTGGGTCTGCTATGC  
TAATTCCTCATCTCAAATCACTCCATCCCCGGGGTATTGTCTCAACGAAGAAGTGATT  
GTAGGAGTGAAAGTTTGGATATAATTTCGCAAGGCAAGCCCGCGGCAATAAAATAGGAAAA  
GAAAAAAGTATTTATTTTTCACATTTATAGGATTAACAAAAAGGATTCGCAATAAAAG  
CGCTAATGCCACGACAGTCCGTAAATTGTTAAAGCTTCCATAAAAGCCAGACTAAGCAA  
TAAAGTACCTCGTATTTTACCCCTCTGCTTCTGGCTGTCTCGCGATACCTTCTACGGCTTG  
GCCCCGAGCAGTACCTTGACCAACTCCAGGTCCAATAGAAGCAAGTCCACAGCCAATCC  
AGCAGCAATAACGGAAGCGGCAGAAATCAATGGATTTCATATTAAAGTTCCTCGACCAAAA  
AAAAGAAATGGTTAATGATACAATCAACCGATGAATTATTACTTCATTATTCCATCACTT  
AAGATCTATCCGAAAAAAAAAAGAACTAAGAACTCTGAATTGAAATAATAATATTACTG  
AATCATCAGAGCTACTTCGATATCTCGTTTTTAGTTCCTATCCGTGGAGTCTTTGTAAAT  
CTATACGGTTCAGTTCCTCCATTTCTTTGTTCGAACCATTCATTCTTTCAATTCTTC  
GCTCTTTCTCTCTATATGCATGCTTGACTTCATTTGTTTATTTCATTCAATCCACAGTCA  
CAAATAAAACGGGAAGGGCTTGCAATTGGAATCCGTCTAAATTCAGTGGGATGGGAAATAAT  
ATATATGGATAGCCCATATAACTAGTGAATATCTAATATCACATATACATTGTTTCTT  
TAATAACGTAAACCATCCGATCTTCTATTGAACCGGATTCTAGAATCATTCTTCGAAAC  
ATATACAGGGATTGGCTTAGAGCCCTTACATATACCCAGCTCGACCCCCCTTACTTTTTT  
TGAATTCTCTAATATCATACATTTTTTTTTTGTCTCTATTCTAGATCGTATATACCGGTA  
TGAGTTGGGATAAGCTTTTTTTTTTAAGACCATTTCGGAAGCTAGTCAATGATGACCCTCCA  
TGGATTACCTATATAAGCTGCGGCTAAAGTTGCAAAAATAAGAGCCTGAATCCCGCTTG  
TGAATAATCCAAGGAACATGACAGGTATAGGAACCACCGAAGGTACTAAAGAAACAAGAA  
CAACAACCTACTAATTCTCCGCTAATATATTCCCGAAAAGTCGAAAACCTAAGTGATAAGG  
GTTTTGTGAAATCTTCTAGAATGTTAATTGGTAAAAGTATTGGAGTTGGTTGAATGTATT  
TACCGAAATAACCAATCCTTTTTTGGTAAGACCCGCATAGAAATATGCCACTGACGTAG  
GTAAAGCTAAAGCAACAGTAGATTTATATCATTCGTGGGTGCAGCTAACTCTCCATGCG  
GTAAGTGTATGATTTTCCGGGGTAAAAGGGCACCTGACCAGTTAGAAACAAAAATAAATA  
GGAACATAGTTCCCAATAAAGGGAACCAAGGACCATATTCTTCTCCAATCTGAGTTTTGC  
TCAAGTCTCGAATGAATTCGAGGACATATTGGAAGAAATCTGACCGTCGGTTGGAATGG  
TTTGTGGATTCCGAACAGCTATAGTGGCTGAACCTAATAAGATAGCAATTACAACCCAAG  
AAGTGATAAGTACTTGGGCATGGACTTGGAACCCCCCTATTTGCCAATAAAATGTTGGC  
CTACTTCCACATCGGATATATCGTATAACGCTTTTAGTGAGTTGATGGAACAGGGTAAAA  
CATTATATTGCCCTCTAACATAAATAGAACTTAAAAAGGAATTATTTGATTACGCCAT  
CTCGTATCTTTTCTCAACTCGTCTACTTTGAATCAATCGTATATTTTCGGATCCCAAGTG  
ATCACATAAATATCCCCAGTGATTTTGATCTCTTTTTTGAGACTCAGGGATAGTAACCGAT  
TCAATCAATTTATGGAGTTTCCAAAGTGATTGACTTATCCTAATCAACAATTTCTTATAT  
AGCTAGAACTGCCCTCACAAATTGCGGATACATAATTGTTAAGAATCCATCGGATTGAAG  
CCATAGCGTCATCGTTTCGCTGGAATCGAAATATTGCGAGATCCGGGTCACAAATTTGTAT  
CGATTAACACAAATTTGTTGGAATCTCAAAGTGAGACATTCTCGAAGAGCCGTATATTCTT  
CTTGCTGACCAACGATGATTACAATATCGGGTAACCCCGTCATATATTGATCCCGCCCA  
GATAGGTTTGCAAGTGAGATAATTGCCTCTTCAACATTGCTACATCTCTTTTCGGGAGAC  
AGTTGAGTTTCCCGTATTTTGTTCGATCTCAAGTTTCTGAACCTATGAAGTCTCATTT  
CTGTAGTGGACCAATTCGTTAACATACCACCGAGCCATTTTTTATTAACATAATGACACC  
GAGCCCTTATTGCAGCTGATGCTACTAAATTGGCTGCTTTATTTTGGTACCAACTATTA  
AGAAGTGTTTTTCTATACTTGTGTCATCAAAACTAAATCACAGGCTTCTGACAAAAAAC  
GAGCAGTTCGAGTAAGATTTGTAATATGAATACCTTTACGCTTTGAAGAGATGTAAGGTG  
CCATTCTAGGATTCATTTCTTAGTACCATGGCCAAAATGAACTCCTGCTTTCACCATCT  
CTTCAAAATTAATGTTCCAATATCTTCTGTCTATTTCTCCCCACATTTTCTCTCTTTTTT  
TTTATTTAAGAGGTACCCCTGAAATAAATAATTGTTCCGACGGAACCTTCTACCGGAGAT  
TGACCGTTAATACCCAGTCCAAGTCATTAATTCTTTCTATTCTGTTATTATCTTTATTAT  
CAAATCAAATGACCAGGACCCCTATAGTTAAAAGAAAAGAAATGAATCTGTCAATTAATCCC  
GTAATGATCGTTCTGATGTATCAGGGAAATTTTGGGATGCAAGAACCAATAATTCT  
CTATGGTGAACAAAAGATCTCTCATTTCTCTCGAATGGATTCTTCTTTTGTATTCC  
AAAGGAATGTTGCTGTGTGCTTGAGCGGTGCACTAATCCTTTGAATCCGGTACCAACA  
GGCATCATCCCCCCCAGAACACGTTTTCTTTAGGCTTTCAACCAATCAATACGACCT  
CGTAGAGCAGCTTTTGCTAAAACCTCGAGCGGTTTCTTGAAAACCTCGCTTCGGATATGAAA  
CTTTGAGTATTCAGAGATGCCCTCGTTATTCCCAATAAGATGGCTCGGTAACAGATCGCT  
TCTTCCAAAGCAGCCCTGTTCGTTCCGCTCGCAACATCCGATTAGTTCTCCAGGTGAA  
AAAACATTAGACATTCATCTTCTGAAACCAACACTTTTGATGTTATTTGACGTACAATA  
ATCTCTATATGCCTATTATGATCTGCACCCCTTGGGATCGATAAACCTTTTGGATCTTA  
TTAACCAAAGAGATACGACTTTGCGCTATGGTTAGTTTCAGCGCCAATCAAGAAATCCCCAA  
GGAATTCCAAGGATTCTTGTTATACGTTTCGTTCCAACCCCTCAACCCCTCTTTTCTAAGTTC  
ATCGATATTGAATCAATCGAACGCGCTTCTAACACTTGTTCCACTTTTGAAGACCTTGT

GTTATATCACCCGATCTCGATTTTTCATATATAAAATGTAACATAATGTATCTCCTTCGTAA  
AGGATTTCTCCACAATGGCCATGAACAGTTGCCCTGGCGTAGCCAAATGGGGCTTAGCG  
GATCTTATGACTAAGGAGTCAACATGAACAATTAGAACTTGACTCGATTTTATGTGTGGT  
CCGCATTTGGATATACATACATTTTTCACAAATAAACTGTCCAAGGCTAATTATGTGGAT  
GTCTCCTCACAATAATCGTGAGGGAGAAAGCACCAATTCAAATCGAATGGATTAAAAATG  
ATGTTACTGCATGAATCGGGATTATAAATTCTCCATTTTCATCCATTAAATAATATTTA  
AGCCCTTGGAAGTGTGTTGAAATTGTCAAGTAGAAAATATTTCTTTAACAGATCTGA  
TTATGAGTTATTTAAATAGAAATAGTAAATGAATAAAATTCGTAATTTGAGGTACAATC  
CCTAAAGGACCAACGAATTCCTAATGGGAATCGCGGATCCTCTTTAATTAATTTAATT  
AATTCCTTGTGAGATTTTGAACCATTTGAATAGACCAATTTCGAGAACAATCGGATGATAAC  
AAAATTAGAAAAGATGGACATTCCTTATTTCTATTTCAGCAACGTACGAATAGTCCCTTGA  
TGTGGGTAAATGATTGAATCCTCGCCTTGAAATAAAAAGGATTAATATTGGTGCGATCT  
GATCCATTATTGGCAATCAATCCTGAACCTTGCCATATCATTCTTTTCCGATATAAAAA  
ATAGAGGACTTCACTAAATCAATTCTTATGAAATCTCGAATCAGATCATTGGCCCTTACT  
TCAACAAGGAAGCATGAACCTCTTCTATAGAACCATCTCGGTCTTGGTTCCAATTCAAT  
ACTAAACAAGTCCGAACATAATTGAAGACTTGTGTGATAAATCCCCGAATCGGTTTGCCA  
TTTCCATAAAGGATATAAATTGACAATTCGTAGTGCACATTATCCCTTTCCTGCAACGGA  
TCCTGGGGGAAAAGCGTGTCTAAATTTATCCATCAGCTATTTCATATGTGACTACGGGT  
CGAACTGAAACAAAATACTTTTTCTTGGTAGGTGTAATCCGTTGGACATAAATCCAATTT  
TTCAATTTTTTTGATTCCTTAGAATTTTTTTTTTCCCGTTCTGGTGGTATCAAGATGCCG  
CAGTGCCGGGATATCTTATCTGTCGCTCCAGGAAAATAGATATCCCCAGAAAAGATTTTG  
AGTTCATCCTTTTTTTTTTCTCTCCACCCGACCAATCCGCCTACTTGGCTTCTTGTA  
TTTAAAGCGATTCTGTATCTACTCCAATGATACTGTGTTCGTACCATTTATGGGCGAA  
GAACCGGGTAAGATATGCACTTCTTCGGGAATGAAAAAATCGATCTACTTTCAATTTGG  
TATTTTGGCCTAAATCTTTTGTCTTCGATACTCAATCAAATCCTCTTTTTTACGATT  
GAACCCACCCCTATAGTCCCATATTTAGTAATTCCTGAACTGCTTCTCTGTATAGGGGA  
TCGTGGAATAAGCAAGAATACTATTTCTAGGTAAACACCATTTATGGGTATTTCAATC  
GAGATACCGGAACGGGGCATTAGTTCTTTTCTCGTTCCTGATCAGATTGGAATGGGATG  
ATAAATCTATTTCTTCGCTCTTAGCCAATAAATCAGAATTTCTGTGGAGAATGGTAGGA  
TATATGAAATTCGAATGACCGTTGGATATGATTCGATCAGGTCTGAATAATCAAGAACC  
CCCCCTTTTTTACCGTAAGGATTCGAACATAACAATTTGTGTCTCACTTGATCATTAGTC  
ACGGAGAGGTGAGAAATAGATCTCCGTTCAACAGAATGAACATTCATTGATCTTGATCC  
TTGTGGAGCGAAAAGGCACTATACTGGATCTGCACAGAGCTCTGATAATATCCATAAA  
TGACTTGTTTTGGGTAAAGATGAACATTACCATATTTATATTCAGGTGCATGGTACACA  
TCGGTACTCCAGTGCATTTCTCCCTCTGAGTCAGAATAAATATGTTTTCGAACTTTCTCT  
TTAACTTTATTAATAATTGAAAGTGGATGTTCCAGCGCAATCTCAGCAATCACTTGTCT  
GATTTCTACATATTGATCATTTTTTGAACATAAAAGAAAACTTTTGGGTGGAATATTCACATTA  
TGTAAGATATCGTGACTCTCAATAGTTACATACAGGTCTATATAACATAGAAAAGCAGGA  
TGCCCATGACGTGACGTGTGGGATGAACCAATCCTCATTGAATTTGATTTTTCCCTTA  
AAAGGAGCTCGTACATGTTCTGCAGTACCACCTGTGAATATCCACCGGTATGAAAAGTT  
CTTAATGTTAGTTGAGTCCCGGTTTCGCCGATTGATTGACCCGCAATAATACCTACTGCT  
TCTCCTAATTCGACAGTGCCTGCCATGAGTGGGACTCTGACCATAACATAATCGACAGAT  
CAAGATATACTCTGCAAGAAGGGGGTTTGAATATATATTGGTTGTGTTCGAAAGGTT  
ATGAATCGAGTGACAAGTCCAACCCCAATATCTTTATTTTGAGCGGCAATGCAACGTGGA  
CCCATATATATATTGTATGCTAATACACGACCAATTAGTGTTGGACCCAAATTTCTTCC  
GTCATCCCATTTCTAGGACTCACGGAATGCCTCGGGTAGTGCCACAATCTGTTCTACGT  
ACAACAATGTGTTGAACACTACTCAACAAGTCTACGCGTGAGGTATCCAGCATCTGATGTT  
CGTACAGCAGTATCCACAACCTCTTTCGCGGCTCCGTAGCAGGAAATGATATATTCCGTT  
AAAGAAAGTCTTTCGCGTAAATTTGCTTTGAATCGGTAAATCAATCATTGTCTTGGGGA  
TCGGACATTAATCCTCTCATACCTACTAATTGGTGTAACCTGAGATGCATTTCTCTAGCT  
CCCGAAAAGGACATTATATGGACTGAATTAGAAGGATCAGTCATCCTAAAATTAGGATGC  
ATTTCTTGTCTCAAATATTCATTGTAGCATACCATATCTCAATGGATTGGCGTAATTTT  
TCTACTGTGTGATCATTCCCATAAATGATGGTGCTTTTCTAAAATGAACTTTGTGTGTTCA  
GCATCTTGGACTAACCACCCCTTAGAAGGTACTGTTAAAAGATCATCAATTCCTAATGAA  
ATGGATGTAGCAGTGGCTTGCTGGAACCCAGAGTCTTTACTTGATCCAGGGTGTGCGAT  
GTATATGCCATTTCCGAAGTGATCTATTAATCTGCTAATAAGTCGTTTCATGGCAGACCCA  
TCTATCGCTTTATTTGTAAGAAGACAGATCAGCCCATTTCTGCCATAAGTACTTCTCTATTC  
CGCTGAGTAGGATTCGCGAATGGGTTTGAGTCAGTGATTGCAAGACCTCCTTTACTGGAT  
CTCGATTTCATGTAGAAATTAAGGAATTATGATTCCAGTTGAACCGGAGAGATCCAAATTC  
CCGCGGTATTACATAATTCCTTAGCTTAGGTACCGTATGAGTAGGCCTGACAAAACCCCT  
GTATGGCTTCTTCTATTCTCGAGAAAAGAAATAGGACCAACAGTGGTTCGGGTGTATA  
TACAAAGGGTTTGTTTTTTATACGTCTTACTATTAGATAGTCCCATAAATTTTCATGAT  
AGGTACCCAAAGATTCATATTGAACCTCGACAGGAACCTTCTTGGAGCAATGACACGTT  
GATCTAGTCGCCACCGAAGCCACAAAGGACTATCTAAATTGATTTCGTTTCTGCTGATAAA  
CTATAAGTACATCATAGGAACACAAAATAGGGCTCTTTCTCTTTCGTAGTATATTTAT  
ACTTATAATCATTAACGTGTTTCATTTTGATAGTTTATGCGATTCCATGGATTATACCTAT

TTGCACAAATACCTCGACGATTCCCGATCGTTAATACATAGAGTCCAATAAGCATATCTT  
GGGTTGGTACCGBAAATGGGATCTCCAATAGCCGGAGAAAAGAGATTTCATATGAGAAAACA  
TAAGTAAACGAGCCTCCGCTTGCCTTCCAAAGATAAAGGTACATGAACAGCCATTTGAT  
CCCCATCAAAGTCTGCATTGAATCCTTTACGAACTAATGGATGTAAACAAATAGCACGTC  
CACCCCTAAATGGGCTGGAACGCCTGTATGCCTAATCTATGCAGGGTGGGCGCTCTAT  
TCAACAATACAGGATGCCCTGCATACTTCTTGAAGTATTTCCCATACAATGGGTTCTT  
TTTCCCGAATTTGACTTTTAGCAATTCTCTATGTAGAAAGCGATATGTCGTCTGATTAAC  
CACGAATGACAAATGTCTGAAAAAGTTCTATTGCTATTTCTCGAGGTAATCCACATCGAT  
GTAATGAAAGCGAAGGGCCACGACAATGACGGAACGCCCCGAATAATCGACCCGTTTAC  
CAAGTAGAGTCTCACGAAATCTTCTTCTTTGCCTTCAATTACATCTGAAATGACTTGT  
AACTTTTATTATGACCGTCTCTCATTGGTTGTCCGCGGATCCCATTATCAAGAAGTGAT  
CCACGGCTTCTTTTACCAATTTCTCCTGACACATTACTAATTTCCCTGGCGTAGATCTAC  
TTGTTGTTAATGAATCGGTAAGAGTATTGTTCCGATAGATAACTCTCGGTAGAGTTCAT  
TAATATCCGAACCTATTAGTTTACCCTCATCTATCTGAATGATTGGCCTCAACTCGGGAG  
GAAGAACTGGTAATAGGCACAAAACCATCCGTTCTGGTTCTACATTTGTTTCGAATAAAAT  
GCTTAGCTAATTCATGCGTCTAACCAAAAAATCCTTCTTCTTCCAATTTTTCTATCTT  
CCCATTCAATCCAGTGAACCTTCTTCCCTAATTCTTCCATTCTACCGATGAATGAT  
CTATAATAATTCGCAAAATCCGGATCGGCTAATGTTCTCTGTATAGCACCTGCTCCAGTAG  
AGATTTCTCGATTTGCAATGTATCGAAGCCTGGGGTAGTAAAAAAAGTGGGATGCTGT  
ATTTCCGGGATTGGATTTCAGATTTCGAATGAACCTCGTAATCGCAAGAAAGTCGGTTTTT  
TAGCTATGGGCTGGCAAAAGAAAAATTGGGATAGGTTCTATAGGATCCCCCTTCAAA  
ATCGGACGTGATGGTTTCTCTCATCCGGCTCAAGTAGTTACACCAATAAAGAAAGGGG  
TTCTCCACTTTCAAAATTTGTTCTAGAAAATCCAGAAAGATCTACTCTTACTCAAGTT  
CCCAGTGAGGACCAACAAAAATATTTTCATGGATTATCCTTCTCTTGTACTTTTCTGAATT  
ACTTATTCAATTACGATAAAAAATGGAATGTCAAATTATGAGTAGTCTACTTCCCTTCGA  
ATGATAAATCCCCCTAAATGAAAGGAATACCTTGGAAATTAATAAGGGATTTACTTGTCTA  
TGTATTGTTTCATTTCGATCTTTTAGGTCTCCACTTCACCTCGACGGTTATGCCATAATGT  
CCCTTGAAGCATATATGCGATGGATGGGCTCCTGTAACCGTGTATATTTGTTTATTTGA  
ACAGAATCTCTTTCTAAAAGAAATAGAACGTCTAATTCACGAAAGAGTTTTTTTTTT  
TCACGAGGTACAACCTGTTATATGTTACGGAATCGACCATGGATCAATTCCTTCTCATT  
GGAAGTATTGAATACAAACCATAAATCTGAGCTTCATATTCCTCTCCCAAGATACATGTC  
AGAGTCAGGGGCATCCCCATCGAATTGAATGGGATGACAGTTTCTCATTCGGAATCTGTA  
AAATCCTAATTTTCGATCAAATCACACATCGCAGTATACTAGGCCTTCTAATTCCTTAAGG  
GGTTTATCTAAAAGATTTCGCGATATAACTAGGAAGACGTTTCAAATACCATACATGAGTC  
GCTGGACATGCCAGTTTGATGTATCCCATTTGATATCTTCGTATCCGAGAATCAACAAAT  
TCAACTCCGCATTGTTTCAAAAATTTTCGGATCTTCTTTTCTCTCCGATCACTCGATAA  
TTTCCACAAGCACAAATTCGCTTTTATAGGTCCAAAAATCTTTTCAAAAACAATCCA  
TCCTTTTCCGGTTTATTGCTTTTGTAAATGAAAAGTATAGGGTTTTGTACCTCTCCAACC  
ATCTCTCCATTAGGTAGGATTTTGGTGGCCCAAGCACTTATTTGTTGAGGAGAACTGAT  
CCAACCTCGAAGTTGTTGATGTTTATATCGGTCGATCATAGAAGAAAAATTCGATTCAAT  
TCGATCAAACCTTCTTCTGTTAATCTGGAAGTTCTTCTCAGATACAAGGAAATGATTCA  
GTTCCAGAGCCAAAGATCGTAGTTCTCGAACGAGCAATCGAAAAGATTCTGGCGCATCTC  
CGGGTTTAAAGTATTGTTCCGCCAATGATTGTAGTTCCAAGTACTTCTGACGAGCTCTAA  
TATGATCCGATTTATAAGTAAGCATCTCTTGTGAAATATGAGCAACACCAATCCCTCTA  
GAGCCCAAACCTCCATTCTCTTACTCGTTGTCCCCCTTGCTTGGCCCTTCCCTTAAGGG  
GTTGTTGTGTAACAAGTGCATAATGCCCGCTGGAACGTCCATGGATTTTATCATCAACTT  
GATGAATTAATTTCAAGGATATAGGACTTCTTATTAACCGGTTGTTCAAAGGATCTC  
CTGTTCTTCCATCCAATATTCTGCTTTTCCCGGATACTCGGGTTCAAATACCCACGGAT  
TTGCTGTTTGCTTACTGGCTGAATATAATTAGGAAACACTAGCTTTCTCGAAGCCCCCT  
GCTCATATCTCTCATCAAAGGGTGCTATTCTATAATGCTGTCCAACAGGTACCCCGCTA  
AACCGAGCGAACATTCAAATATTTGTCCACATTCATTCGCGAAGGTACTCCTAATGGGT  
TGAAGACCATATCGACCGGTGTTCCAGCTTGCAAATAAGGCATATCCTGCTAGGCAAAA  
TTTTTGAAACGATACCCCTTATTCCCATGTCTTCCAGCTATTTTATCACCTACTTTGATTT  
CACGTTTCTGTAAAATATATACACGAATCGTTTCTGGATTATAACTGGAACCCCCCTTTT  
TCTGGATCCATCTCACATCAATAACTCGACCCCTTCCGCTATAGGTAGTTTTAGACAAG  
TTTCTTTTGGCGGTGGATACCTGAATGCCAAGTATGGCTCGTAATAATCTATCTTCCGGGG  
CATACGATGATTTCTTCGCCGCTGAGGCGTTAATTTACCCACTAAAAATATCACCTCTTT  
CTATCCAAAGATCCCAAGCATTAACAATTCATTTTGTCTAAATTGCGGAGTAATGGGCTT  
CTAAATGCGGTATTTTATTAGTGATTCTTTTCGGGGCTTGGCTTGTACATGAGTCTGAA  
TTTCATATTTCCGTATGTGAAAAGACGTATAAATATCTCCATATACCAGACGTTTCGTAA  
TGAGTACCGCGTCTTCAGAATTGTAGCCTTCCCATGACATATGAGCTACTAATACATTTT  
TTCCCAAAGTAAGTTACCGCCAACTGTAGCCGCGCGCTCCGCTAAAAATTTGTCCCTTTT  
TAATGCATTTACCCCGCGGAGCCTGAGGTTTTTGATGCATACAAGTATTTTGTGGAAC  
GTTGATACATAACCAACGGAATGCTTATAGTGTCTCATTACCCGATAAAACGATCTTGT  
CCGTATCGGTATAAATGATCTTTCCCTCGTGTTCGGCTATAGCCGAAACCCCGAATCTA  
GAGCCGCTTGGCATTCCAACCCAGTTCCAACAATGCATTCTCGGATCGAGAAAGCGGAA

CTGCTTGACGCTGCATATTAGAACTCATTAAAGCCCGATTTCGATCATTATGCTCGATAA  
AGGGAATGAGGGAAGCTCCAATAGAAAAATATTGGAAGGGAAAAATGCTTCGAAGATGAA  
TCTGTTCCCATGCAATAGTCAAGAATTCTTGACGGTATCCGGCTGGAACAACCTGTTCTT  
CCTGAATACCCCGATTCAAAGCCAAAGAATTTCTGCCGCTACCATATAGTATTCATCTC  
TACTTGGTGATAAATAAACCATCTTTTTTGTATCTCTCAGATATTTCAAAAACGGACTCT  
CTATAGACCCCCAATGACCAATCCTCGCATGAATAGCTAAGGATCCAATAAGTCCAACAT  
TGATTCCCTTCGGACGTGTCAATTGGGCAAAATACGTCCATAGTGACTAGGATGGATATCTC  
GTATCCGAAAACCTAGCAGTTCGCCCTGTAAATCCTCCAGGACCCAAATAACTCAATTTTC  
GCCCATGAACATATTTGTGTCAATGGATTAGTTCGATCCAAAACCTTGAGATAAAGGGTGTA  
GGCCGAAAAACGATTCTATAAGTGGTTGTTAATGGAGTTGGAGTTACCAAATTATGAGGAG  
TCGGTATCAATTTATGCCTGATTGCTCCACATATAGTTCCTCGAACCCGATTTTCTAAAC  
GAACCAGAGCCCAATCCGAATTGATCCTGTAACAGATCTGCTACAGAACGAATACGTTTAT  
TTTTCAAGTGATTTCATGTCGTCAAGTGTGCCCATTCCAAATTTTCATTCGGATCAAAATGAT  
CCACAGCAGCCCAATACGTCCTTGTGGTAACAAGAATGTATTGTTCCGAGGTATATCAAGAT  
TCAGTCTCCGGTTCATATTTTCGTCGACCAATCCTTCCTAATTCACATCTTTGTGAAAAA  
ATTTCTTTTGTAAATCCTTACATAAGGACTCAGAAAAATACCGGATCCCCGCCTACACAAG  
CAAATTGTTGATAAACTCCAAAATGGCATTTCCTTGACCCAATCTTTTTTTTCTCCT  
TATGATTCCGGAAAGACAGAATAATTTAGGGTAGCAAACATATCTAGAATTTCTCTTA  
GATTCGAACCCATAGCCGATGATGGAACCTAGGATAGATATTTTTGTTTCTACTCACAC  
GGGCCCATATCCCTTGCTTTTCTATCAATCTCTAATTCGATCTTCCCCCAATCTGATA  
TTATGGTGCCGGTATAGACAGAAATTCGCTATGGTCCAATTCTGAACGGTAATAAATAC  
CGGGGCTTTGCAATATTTGATTGATTACAATTCGTATATTCCTACTTACTAGAGAGGTTT  
CCAGGGAATTCATTAGAGGAATATTTCCAATAAATACGGTTTGTCTTGCAATATCTCTAC  
CGGTTTTCCAAATTAATCCCGCGGATACATATAATTCAGAAGAGTATGTGAGTGATTTCAT  
ACACAGCATCTCTTCTTTTATCAAGGGCTCTGCCAATTGATATGTTGCCACAATAATT  
GAAATTCAAATTTCTGGTCTGTATCTTCAATTTTGGAACTTATGAAGTTCTTCCATCA  
AGCCTTGATCAATGAACCTACAAAATCCGTCAAATTTGTATCTGACTAAACCTGGTATTG  
TATACATTCCCTCATTTCCATCCCGAACATCTTAAGTTTCCGTTTATCGAAAAATCC  
AACTATTGGCTCACTCTCGTTGAACCATATAGATTGATCTAGCAACGATGGAATGTATA  
TTTTGCTCATTTGAACAACATGAAATTTTATCCAACCCCATATACATATATACATGTACT  
AAATACGTATGAACGGAGGAATAAAAAAATGTGACTCAAATTCGAATTTGCGACAGAT  
ACAAATGGAAATGAATTGATAAAACATTCCTGGAAACAAAATTCGCCACTTAGACTTAT  
GGAGTCTTGATAGAAATATCAAAATAGATCCAATTTCTACCTTATGATATTACGATCAGA  
TTGGGTACCATAAATGGATTCCGAATTGAATCTGTTCTCTATGAGTGAGATAAAGACAGA  
ATAATCAGGAACCGTCTAGAGTTGACTTTGATTTTAGCACTTAATTTATTTTCATCGATTC  
CGTTGTTCAAAAAATGATTGCGCAGAGAGAAAAGATATTTCTACCCATTGTTAATTAGTA  
GAATACGATTGAAGTGCGTAAGAGAAGTCATATTTATTAAGTACATGCAGATATAACTAT  
CTAGCTATCCGTATATCCCATCTTTTATCGAAGTTCCTTGAGGCAACATAGGTCTGTGCT  
ATATCCAAATTTCTATTTTATATTCATATATTCATGAAAAATGCAAGCACGACGATTT  
CCTAATAGGAATATGTAGATAAGATACCTGACTAGGCATTTGTGTAAGAAATTTCTGTACT  
GGGGTTTACATATACACATAATTGTTGTTATAATTGAAATTGAAAAGGATTAATTATGGA  
AAGAATTGGGACTGATTAGTCGTATATCAATTTGATCTCCTTATGTCATTAGGAAACC  
AAATTGGAGATCAAAATCCAAGAACCATTTCATGAATTCACAGTCATTAATGCTTCCAATT  
TGTTCTGAATTTTGGATTCTGTGACTGGAAATCCATTTTCTCTTTCAATAGAAAAATAG  
GGGAAAGCTTTTATTTAAGTGTGTGTGTTTGAATACAATCAATCTAAGAGAACAACA  
GGATCCAATCAAAAGAAAGAAATGGTTCAGCAATTCGCCAGAATATTTCCATCTATATCT  
ATTTTGATTCGTTTTGGCGCATGGCCGAGTGGTAAGGCGGGGACTGCAAAATCCTTTCT  
CCCCAGTTCAAAATCCGGGTGTCGCCTGATTAACAAAAGACTCGGAATTTCTTACCCTACT  
AACTAATAGAACTCACAAAATTCCTGCCTGGCAGAAGCAGAGGTAAGGGGCGGGGACTG  
TCGATACCCAATTTTAAGAATCGGGGGTGTGACTTTCATTAATTTCTTCAAAAATCGGGG  
TGTGACCCAAACCTGTACCATACCAATATGAATTACCAATATAAATAAAGAAATACAC  
TTAATTACGGATTGCTGATGCGTTCAGGCCATTGATTTGATTTATCAATCGAATCAAATC  
CATAGTAAGATTCAATTTGTGAGATTGAGAATACGAAAGTCAGGGACCGTAATCCGTGT  
ATCCAAAGGAAGTTCCTAAGAGACTGTAAATCCTTGCTCCTAGGATCCAAGAAGGGGTT  
CTAGGAAGGACTATAAATACTTCTTAATTACCTTACCTACTAGTGTCTTACTGACTGAGT  
CTTGAAAGTAGATTGGGTAGGCTGGTGGGAATCCAATTAGGAGTTGTGGAAAGAACTGAA  
GATACTTTGTATCCATACAACTCATGAGAGTCTCTGAGTGCTCAGGTTTTCATTAATA  
TTGTATGGGTGATTGGCTTTTATAGAATAAAAGTGGAATAAAGTGCTTTCGTTGGGGTAA  
CCCCGCCAAGAATGTAATAGGGTGTCTTCCAATTTGTTTCACATTTACAGAAGTAGAGAC  
AGTAAGGCTTAGATGGGAAATTAGGAGTATGTATAGATAGTTATATATCTTGATGGTAT  
ATTTTTTTTTTCTGCTTTTGTATTATGAAAGGCAACATAGGTCTTACTATTCTTACATA  
TTCCATTAGTCACATTCCTTGAGACTTCCAAGGGGCAACTGTGTATCTTGCTTGTACTT  
AGTGCTTTCCGATTCCACCAGAAATCATATAGGACTTGTACGGGTGATTCATTGGAT  
TGGTTCATCAAAAACGTTAGGTCAAAATCCCATTTTGACTCTGCACCATTGATTCCACTA  
TTATTAGTGATCAAGAATGGAATAATTCCTTCATATTCATAGAGATAGGGGACACGATTC  
ACATGGATATAGTAAGTCTCGCTTGGGTGCTTTAATGGTAGTCTTTACATTTTCCCTTT

CACTCGTAGTATGGGGAAGAAGTGGACTCTAGGGGTACTACTAATTGAGTTGAGTAATCG  
AATTTATCAATTGTTTAAATAGATCGTTCTGCAAAGCGCTTTTAAATCAAAATATCTCCA  
CCTCATAAATTCTACTGGAATCCAATATGAATAAGAACCTTTTCGATCAAACAAATATTTC  
AACGACTTGATTCCCATATTTCGTATTTTCGAACTCAAAGGGATACACATGATGGGAAATT  
TTTTCCAACCGAATTCTTTCTAAATATTCTATTTTCGACAAATCGGCCCTTACTAGAATTA  
TGCATATTACAATGAGGAGCAACCAACCCCTATTTTTTTTGGATTTGTTTCCCTTTTCT  
CTTTGCTGTTCAAAGAGGGAACCGTTCTTCTATTACGTACGTGGATATGTACTTTCTACT  
GAGGCGACATAGACATAGTGGTTGTCCAAAGAGGTACTACGCCAAATAAGATCTTACTTT  
CGTTGGGTATGCGTACTTACCTTTTTTATACTCCTAGGAATCTTATTTATGCTTTATCGAC  
TCGTCTCATGTATGGTTCAAGCATGAAAAATCGGTGGGGTCTACTACATCCTTTTCAA  
ATCCGAAGAAGTTACTATAGAATTTTTGGATCATCCGTTAACGGATCAATCAATTACTT  
CTTCGTAATGCTAAAAAAGGCTTGGTTTTCTTTTATATAATATATGCCCATACTAGTCT  
TTCTCCATTGATCTTTCAATGGATCCCCGGATCCATATTGAAAAATATCAGAAACCCAG  
GAATTAGAAAAGTTGACGTTTCGATTATTTTCAGATTGATCGGGATCAATACAAATTGACGT  
AACAAAGAAATAGAATTGGAGTGCTATTTACATGTACATATATAAATGTGGGTACATATT  
GTGGATTGATCTATATCAAGCTCATACCTTTCTACAATAATAGATAGTGTGGTAGAAAGA  
ACTATAATGAACCTTTCTACCATACTATCTATTATACTGCTGACTCCAACCCGACCATTT  
AAGACTTGGAATTTGAATCCCTTTCTTTTCATTTCTTCAATCGTTGATAAGAACTAATAAG  
TCAAGTTTCAGTCAAATTAATCACTTTGACTGACTGTTTTTACGTAGATTATAAGTAAAA  
AAGCAGTAGGAACCTAGAATGAACAACGCAATAGCAATAAATGCTAGAATATTGACTTCCA  
TAATCTCATCGTTTTTTTTTGGTTCGCAATAACTCGGGATCTAATCCCATAGAGATGATA  
AGTCTTTCTCCTGTAATTTCAATAGGATAGATTGTATCCTGATGATACTTAATCGTATCA  
ATATCATGAATAACAATATCTGATCTATCAAATCGATTCATCGTCGAGAATTGAATAGTA  
TAACATAGGAAGATCTTTTATCCATACCGAATCCAAAATTGGATTCTCTGGTCCAATCAAG  
AATCCCATTTGAATTTCTCATTTCACCTTTCTTTTTTATAACCTGCCGTCTTCCTTATA  
CAATCATCTGGCCGGCGTTCCATTGGTACAAACCCAAACGGTAGGGATGAATGGAAAA  
AGGAATGAGTTAAGTTCTAAACGAAGTTTTTGTGAAGATCTACTCTTTTGGGAAGACAGA  
GAAGTGTGATAAAGATTGGTCCGGTAGAAAAGATCTAACAGAATATTCTATTCTGACAAA  
TTCATTTATTTATTGATTTTGTTTTTTCTTCGATGGGGCCATTAATAAGGAAGAAAAAA  
AAAAGGGGGGGTAGGTTTCATCTGAAAAGTACTCTGTCGCTGTGGGGTAACTAGTA  
ACTATACTATATTAATTAATAATATATTAATTAATTAATTAATTAATTAATTAATTAATTA  
AATACAATTTGTGTATGTCTCCCGGGAACGTATGAGTACTCTATTACATGGACCAGGA  
GCAATCGAAAAAGACAGGCCCGTAGGGTCTCTCTTGAAATCTGAATAGGGCGATACCGCC  
GATCAATCTACATATGTCTCTCCCATCAATCGGTACTAGTTGAAGTAATTGAAAGTCCC  
ATATTTGTACGATGAGAAATGCGAAACGAAAAACACGAAAGAAATAAGGATCCCCGGGGG  
ATTAAATCCTGCTCCTTGTCCCCCTCTTCGAGAAATGGGGAGATGAGTTGATGGATT  
CATCGGATTCTAGGTGCGGACTGACGGGGCTCGAACCCGCAGCTTCCGCTTGACAGGGC  
GGTGCTCTGACCGATTGAACTACAATCCCGGGAATGGGGTGTACAGCATACATACATAT  
TCTTATAATTTTCATTGAAACCTTTCTTTCTATTTCTATATTAGATTGAAAATCGACATCT  
TTCTGTTACAAGAAAGACGAGTGATATACTGATATACATGGATATGGACTATAGTGGG  
AGTGACACGGATTACTAGTAATCCTGTGGTTATTTTATTACCAATCAATTGATAATCCA  
TTTTTCAATGAAAAAAGGACTCTTATTTCTATCTATCAGGCATTTTCAATTTAT  
AGAGGACAAACTGGTTATATCATCTCATGGATCGGCGAATTGTTGGGCCGAGCTGGATT  
TGAACCAGCGTAGACATATCGCCAACGAATTTACAGTCCGTCCCATTAACCGCTCGGGC  
ATCGACCCAGGAAGAATCAATCTAGGCTTATGATAATCCATGATCAACCCCTTTTCGT  
CTTACCCCGAGGGAAGTCGAATCCCGCTGCCTCCTTGAAAGAGAGATGTCTGAACCA  
CTAGACGATAGGGGCATACCCCGCGATCGCCATCATACTATCTATGCTCATAGTATGAG  
CAGTTTTTTGAATTTGTCAATATACAATATATATGACTAGATCCGAAGAATCTTTCTTGC  
TTACAAGATTCCATAGAATGGAATTTTGGGATTGTTGATTTCATGAACCATCCTATATATA  
AGAGAGGATAGGATCCTTCAGGGAGTGATTTGTCCGACAGAAAAAGGGCAAACCCCATTC  
CATTTCTTTTCATTTTCACTCGTTGATTTCGTTTCGTCGTTAAGGTGAGATATGCCTATCTCA  
CACTAACACTAACTAAGCCAGGAAATTCAGAAACGATAGAATTTCTTTTTTGGAGATC  
GACGAATAATCGAAAAGATTCTTTTTTTTTTTTCTAATAATTTAATTTAGGGTACGAATC  
GAATCCCTTCATCACATGATTTCGATGAAATACCTTGGATCTATATCGGATTGGTACATGT  
ATCAATCAACCAAGCGAATCTCGTCCGATGAATCAATAAAGCAAAGCAATTAGGCGCG  
TCCTTGAAACAATTTCATTGCATTGATATTTCTCAAATATCAATAACTAAAACCTTCCTAGG  
TAAATCAAATTTATTGTTCTGAATGAGCCCCATGTATACATGTACATTATATACATAT  
ACATTGTAGTACATACATAGATATATGTAGTAGACTCTATAGTAGCTAGTGATTAATCA  
TTTTTTGAAGAAATGGGCCCTTTTAACTCAGTGGTAGAGTAACGCCATGGTAAGGCGTA  
AGTCATCGGTTCAAATCCGATAAAGGGCTTTTTCTACGAAGCTCCAGTCTTCGTCTTCAT  
TTTTTCATTGGAGAATAGAGATATTGTTGATATTGTAATAAAGTAACCCATAATGAGTT  
ATCATTCTAATGAGTTATAGGTATAAAGTGAACAGTTGTTTATTATGATTATGATAAGT  
AATCGTACTTAGTAGGAGGACTACTATGTAATTCACTACAAGCTATACCCCTCCTCATAT  
TATTCCTATTTTGGTCTGGGACATAGATATTCTAGATACCCCAATCCAAATTGTGAATC  
GCCAAACCAAAGTATCCCATTTCTCTATTGTTCCAATCAAATCCCTCGGAAAAATTAGA  
AATCAAGAAAATCAAAAAGTAAGTGGACCTGAGCCATTGAATCATGACTATATCAGCTAT

TCTGATATTCAAATTCGATAGAGATGAAATTGTAGAAGCGAACTTTTCTTTCCTTGGAC  
CACGCAATAATTTGTTCGATATTTTCAGATTGAATCTTCTTGTTCCTGGATGCTCCATAGGA  
ATAAATTGCTCTTCTTTCTCCACAGAGATACGTTTATTCCAAGTCACAAGAGCAATCT  
CTTTTTCAATACCTTTCTTTTGAATTCAGAAAAAAGAAGTTTCTATCTATATAGGATTTA  
GATATAGATATCAAATCATGGCTTCAGGTACAAAATATTTCCATATTGATGCATCAGATA  
TTTTTGTTCCTCCAATGCAACGGAAAACGAGTGCATAAAGGAGGGATTTTGATTTCCAG  
TCTCCCTATTTAATTTAGGGGGCAGGGACAAAAATGGGGTCCTTTTTTTTCTGCCGGAT  
ATAGGGTAATAAAAAAAGTAAGAGGGAAATATTCGAAGTTTATTTTTTTGGTTCGAC  
CCGCGAAAAGATATACTCTGGAATTTTAGATTTCATTCGAAGGAAATATAACAAAGAAGAC  
AATACAAAAAGCAATCAAAAAAGGAAGGAGTAGAGAAATATATATATATATAGGA  
TACTGTAGTAGTTTAGTATACACATAAATTACGAGAATCCATAAAGATATTTATTGATCT  
TTTCTCAATAAGATCCAGAACAAGAATACGATTAGCTTATGGAATGGCGAGCTAGATCT  
GGGGAGCAACTGATAACGAGAGAAAGGATCGCTTGTTCCTCACAGTTATTTCAAAAAAT  
GGATCTGATTGATGGGTCATAAGACAATTCAGGGTTCGGATGGTTATTAAGAATAAGAAG  
GAATAAGGAATAGGAAGGAATATTGAATCGAACTCATGGATTACCTAGGTGGTTTCT  
GGCCCAATAGAAAGGAAGGATTTGTATCTTCGAAACCCATTGGATGGAAGGCGCAGTGGA  
CGAGGAATCGTTCATAGATGACCGAACCATCGTATGCCCTGAGAATGATATGAGGTGTTC  
GGAATGGTTGAGTAGTTGAATAGGAGGATCGATATGACTATAGCCCTTGGCAGATTTA  
CCAAAGAAGAAAAATGATTTATTTGATATTATGGATGACTGGTTAAGGAGGGACCGTTTCG  
TTTTTGTAGGTTGGTCTGGTCTATTACTCTTTCTTGTGCTTATTTTCGCTTTTAGGCGGTT  
GGTTCACAGGTACAACCTTTGTAACCTCATGGTATACCCATGGATTGGCCAGTTCCCTATT  
TGGAAGGCTGCAATTTCTTAACCGCTGCAGTTTCTACTCCTGCTAATAGTTTAGCACATT  
CTTTGTTGTTACTATGGGGACCTGAAGCACAAAGGAGATTTTACTCGTGGTGTCAATTAG  
GCGGTCTGTGGACTTTTGTGTCTCTCCATGGAGCTTTTCGGGCTAATAGGTTTCATGTTAC  
GTCAATTTGAACCTTGCTCGATCTGTTCAATTGCGACCTTATAATGCAATCGCATTTTCTG  
CTCCAATTGCTGTTTTTTTCTGTTCTGATTTCTTGATTTATCCACTAGGTCACTGCTGGTTGGT  
TCTTCGCGCCTAGTTTGGTGTAGCAGCTATATTTGATTTCCTCTTCTTCCAAGGGT  
TTCATAATTGGAGCTTGAACCCATTTTCATATGATGGGGGTTGCTGGAGTATTGGGCGCTG  
CCCTGCTATGCGCTATTCATGGTGCTACTGTAGAAAACACTTTATTCGAGGATGGTGACG  
GTGCAAATACATTCGGTGCTTTTAACCCAACTCAAGCTGAAGAGACTTATTCGATGGTCA  
CTGCTAACCCTTTTGGGCTCAAACTCTTGGGGTTGCTTTTTTCCAATAAACGTTGGTTAC  
ATTTCTTTATGTTATTTGTACCAGTAACCGGTTTATGGATGAGTGCTATTGGAGTAGTCG  
GTCTGGCCCTGAACCTACGCGCTATGACTTCGTTTCCCAGGAAATCCGTGCAGCGGAAG  
ATCCTGAATTTGAGACTTTCTACACCAAAAATATTCTCTTAAACGAAGGTATTCGTGCTT  
GGATGGCGGCTCAGGATCAGCCTCATGAAAATCTTATATTCCTTGAGGAGGTTCTACCCC  
GTGGAACGCTCTTTTGAAGAACTTTAGCTTTAGCCGGTCGTGACCAAGAAACCAGTGGG  
TTCGCTTGGTGGGCCGGGAATGCACGACTTATCAATTTGTCCGGTAAACTACTCGGGGCT  
CACGTAGCCCATGCCGGATTAATTGTATTCTGGGCCGGAGCAATGAACCTATTCGAAGTG  
GCTCATTTCGTACCAGAGAAACCTATGTATGAACAAGGATTGATTTTACTTCCCCATCTA  
GCTACTCTAGGTTGGGGAGTAGGTCCGGGTGGGGAAGTTATAGACACCTTTCCATACTTT  
GTATCTGGAGTACTTCACTTAATTTCTCTGCAGTCTTAGGCTTTGGCGGCATTTATCAT  
GCACTTCTAGGACTGAGACTCTCGAAGAATCCTTTCCATTCTTCGGTTATGTATGGAAA  
GATAGAAATAAAATGACTACAATTCTGGGTATTCACTTAATCTTGTTAGGTATAGGTGCT  
TTTCTTCTAGTACTCAAGGCTCTTTATTTTGGGGCGTATATGATACCTGGGCTCCCGGG  
GGGGGAGATGTAGAAAAATTAGCAACTTGACCCTTAGCCCGAGTGTTATATTTGGTTAT  
TTACTAAAATCGCCTTTTGGGGGAGAAGGATGGATTGTTAGTGTGGACGATTTAG  
AAGATATAATTGGAGGACAGTATGGTTAGGTTCCATTGTATACTTGGTGGAAATTTGGC  
ATATCTTAACCAAACCTTTGTCATGGGCTCGCCGAGCATTTGTATGGTCTGGAGAG  
GCCTACTTATCTTATAGTTTAGGTGCTTTATCTGTCTTTGGTTTCATTGCTTGTGTTTT  
GTTTGGTTCAATAATACCGCTTATCCTAGCGAGTTTTACGGGCCACCGGGCCGGAAGCT  
TCTCAAGCTCAAGCATTTACTTTTCTAGTTAGGGACCAACGCTTGGGGCTAACGTGGGA  
TCCGCTCAAGGACCCACTGGTTTAGGTAAATATCTAATGCGTTCCCGACCGGAGAGGTC  
ATTTTTGGAGGAGAAACTATGCGTTTTTGGGATCTCCGTGCTCCCTGGTTGGAACCTCTA  
AGAGGTCCCAATGGTTTGGACTTGAGTAGGCTGAAAAAAGACATACAACCTTGGCAAGAA  
CGACGTTCCGGCAGAATATATGACTCATGCCCTTTAGGTTCTTTAAATCCGTGGGTGGC  
GTAGCTACCGAGATCAATGCAGTTAATTATGTCTCTCCTAGAGTTGGTTAGCTACCTCT  
CATTTTGTCTAGGATTTCTTCTATTTCGTGGGTCATTTGTGGCATGCGGGAAGGGCCGCT  
GCAGCTGCAGCAGGATTTGAAAAAGGAATCGATCGTGATTTTGAACCTGTTCTTTCCATG  
ACCCCTCTTAATTGAGACAGGAGATCAAATGCATGAAGTAGGAATCCATTTGATTCCATT  
ATACATATTAGGTTAAGATCAGGTCATATTTAAAAAGTATTCCTTGTTTTTCTTTTCA  
TTCATATCTATTTTTTTCTGGCTCGGCTATCCACCTAGCCGAGCCATTCCCTTTATGAC  
ACCGGGCCAGGCCATACCAATAAAGAAACAAATCGATTCAACGAGCAAAAGGAGAGAGAG  
GGATTGCAACCTCGATAGTTCTTTGTTTCGGAACCTATACCGGTTTTCAAGACCAGAGCTA  
TCAACCACTCAGCCATCTCTCCAAGAGACAATCTCATTTTTATTCCTCCGAATAGAACAT  
GGCCATATGGGTTGATACTCTAACTATCTGTAGAAACATCCCAAGTGCGAATCTATATTT  
CGACATATCTATCTGTCTATAGATGCATGATCCAACATGCCCATTTGGGAAGTCAAAAAA

AAATTCCTGATTCCATGTCCGAATAAAATAAAGTGGGACTAAGTTCGAAAGGATCAATA  
AATTCATGGTCAAATCCCGTCATGATGCATTATTTCAATTTTGACTCTGAGAGAGGGATC  
AAATGGTATAGTTCATTTGTTGGTAGCTTGGAGGATTACAAGCATGACTATTGCTTTCCA  
ATTGGCTGTTTTTGCATTAATTGCTACTTTCATCAATCTTACTGATTAGTGTACCCGTTGT  
ATTTGCTTCTTCTGATGGTTGGTCAAGTAACAAAAATGTTGTATTTTCTGGTACATCGTT  
ATGGATTGGATTAGTCTTTCTGGTAGCTATTCTTAATTCTCTCATCTCTTGAACCTATTC  
GGTCTTTCCCGGATCAAAAACTGACCCCTCCCAAAATCTTTCGGATTGTAAGACACAT  
TAAATGAAATATGAGTCCAAAAATAAAAAATAAAAAATGGAGGGAGGGGTCAAAAAATC  
ACTTCTTGAATAAAAAAACGAAGAATCTAATAATAATTGGAATCTTCCCTAAGTATCTGA  
CCCTGTCTGTACAAATGGGATCCAGACACATATATGATATATCATATATGTGTGGACATA  
TACGTGTGTATCAGGAACGAAGAAAGTGC GGATATGGTCAATGGTAAAAATTTCTCTTTG  
CCAAGGAGAAGATGCGGGTTCGATCCCCGCTATCCGCCCATGGTAAAGTAAGGTAATATG  
ATAAATGATTTAGGTATAGTTGACCACGATAGGGGAGTGGTTCTATTTCTCCCATCCCAA  
AACCAAAATAGCCATTGGTTACTAGGTAACGGAATCGCACCTAAAAATGTTTTTTGAAA  
AAAAAATAAAAAAGAAATTTGCGGAGACAGGATTTGAACCCGTGACCTCAAGGTTATGA  
GCCTTGCAGCTACCAAACTGCTCTACCCGCGCTGAAAACTAATGGACGAACAAGAATT  
GGATGTGCCCCATACCATATTCTATATAAATAGAATAGCCATTTATACAGAATGGTAA  
AGGGGGCCCCCTATGATCATAGCTCATAGAGATAAATAGAAATAGGAAGAAGGGGTATT  
TTTATCCTTACCAACTTGATCTTGTGGCCCCGGCAACAAACATGCCTGAACCTTTTCGT  
GAAGTATGTGTCCGGATAGCCGAAAGTCTCGATAGCTAGCTCTAGGTCTTCCGGTCAAAA  
AACACGTCGATGAAGACGTGTAGGTGTACTATTACGTGGTGGGATTGCAATTTTCCAT  
GAATTTCCCATTTTGTCACTCAACGATGAACTTTGCCTATTTCTTTTTTTGAGGATCGAC  
GAATCAATGATATTTCTGTTCCAATTCTGTCTCTTCTCTCCCTCTGAATCAAACCTT  
TCCTTGCCATAAAGGTTCAAGTTCCCTATTATTATCAATGATACGGGTCCGGATCCTAGATGT  
AGAAATAGAAGAAGGTGGATTCTCCCTTCTCCATCGAATCAAATGAAATTGTCGATGATA  
CAGCACATTAAAAAATAAATAACCAAATTTGCCTGATGTAGAGGCAATCAAGAAAGCT  
GCATAAGTGAATATATAACCTACAGAAAAGTGGGCTAATCCAACCAATCTTGTCTGCACA  
ATGGAAAGAGCCACTGGTTTATCCCTCCATCGAATCAAATTAGCCAAAGGCGTGC GTTCA  
TGAGCCCATGCTAAGGTTCAATCAATTCTGCCAATATCCACGCCAGGAAATTAAGAAC  
ATAAATCCAATAGCCCAAACAAGATGCCCAAATAGGAACATCCATGCCAGACCGATAAA  
CTATTCTATACCAAAGGGTTATAGCCATTGATAAGTTGTGAAGAGTTTAACCATAGATAA  
TCTCTTAACCATCCCATCAAATAAGTGGAGGATTTCGTTAAATTGTGAAACGTTACCCTGC  
CATAATGTGATGTGCTTCCAATGCCAATAAAAAGTAACCCATCCGATAGTATTTAACATC  
CAGAAAACCGCCAAATAAATGCGTCCCAGGCCGAAATATCACAAGTACCGCCTCGTCCC  
GGACCGTCGCAAGGAAAACATAACCGAAATCTTTTTATCTGGCATTAACTTGAACCA  
CGTGCATCTAAGCACCTTTTACTAAGATCAATGTAGTTGTATGCAACCTAGAGCAATA  
GCATGATGAACCAAGAAGTCTCCAGGACCTATTGTTAAGAATAGTGAATTACTATTCTCA  
TTAACGGCATTCAACAGCCCGGTAACCATATACTTCGACCAGCATTGAATGCCGGGCCA  
TTCGTTGAAGATAAAAGTACATCGAACCATATGAAGTCTTACCGTGAGCGGATTGTATC  
CATTGGGCAAATATGGGTTTCGATCAAGATTTGTTTCTCCGGAGTACCAAAAGCGAGCATG  
ACGTCGTTATGAACATAGAGTCTTAAGGTATGGAACCTAGAAAGAGACTGGCCCACTT  
AAATGAGATTTGATAGCTTCTTTATGGTCTAACATTCTTGCCAATACATTATCTCTCATTC  
TGTTCCGGATTGTAATCTCGAATGAAGAATATAGCTCCATGAGCAAAGGCCCTGT CATG  
ATGAATCCTGCGATGTATTGGTGATGAGTATATAACGCAGCTTGAGTAGTAAAGTCTTGT  
GCTATGAATGCATAAGCAGGTAAAGAGTACATGTGTTGAGCTACCAAGGAAGTAATAACC  
CCTAAAGAGGCTAGAGCAAGGCCAATTGAAAAATGAAGCGAATTATTGATTGTGTCATAA  
AGACCCTTATGCCCCACGTCCCAATCGACCCCGGAGGAATATGTGCTTCTAAAAGATCT  
TTCATACTGTGCCAATCCCGAAGTTAGTTCTATACATATGACCAGCAACGAGAAAAATA  
AATGCAATAGCTAAATGATGATGAGCCATATCGGTCAGCCATAAACTTTGCGTTTGTGGA  
TGGAATCCCCCGAGAAGGGTTAGAATGGCAGTCCCGCCCCCTGGGAGGTACCAAAATAAA  
TGACGACTGGAATCGGGGTTTTGGGCATAAAGATTCCACTGACCTGTAAAAAGTGGGCCC  
AACCTTGAGGATGGGTAATACATCTAAGAAATTATTCCATCTGACGTACTGCCCCCTT  
GATCCTGGAATAGCGCATGAACATAAATGCCCTGTCCAAGCAAGGAAGTACTCCGAAG  
AGTCTTGACAAATGATGATTGAGACGAGATTTCGGCATTTTTGAACCACGAAACGCTTGGT  
TTCATTTTGGGTTGTAGATGTAACCAACCCGCAATTAAAGATATGGCAGAAAGAAATAAT  
AGAAAAAGAGCTCCAGTATAAAGATCTTCATTGGTGCGTAAGCCAATTGTGTACCACCAC  
TGATAAACACCGGAGTAAGCGATATTCACTGGGCCGAGAGCCCCCTCCTCGAGTAAAGGCT  
TCTACAGCCGTTGACCAAAATGGGGATCCCAAAATGTCATGAGCAATAGGCTTACATGT  
AAAGGGTCCTGTACCCATGACTCAAAATTTCTTGCCAAGCTACATGAAACAGATTTCGG  
GAAGTCCACAGAAAGATTATTGCTAACTGCCGAAGTGAGAAGCAAAATGTTCTGATAA  
AGACGTTCTCAGTAATATCATCATGACTCTCAAAATCATGTGCGGTAGCAATACCAAC  
CAAATACGACGAGTAGTGGGTCCTGAGCTAAGCCTTGGCTAAACTTTGGAATCTTAAT  
GCCATAATGCCTTTCAAATCCTCCTAGCCATTATCCTACTGCAATAATCTTGTGATAA  
GAATGCCCATGTTGTGGCAATTCCACCCAGAAGGTAATGGGTTACTCCTACAGCGCGTCC  
TTGTACAAATGCTCAAGGCTCTAGGCTGAGTAGCAGGAGCAACTTTTAATTTGTATGAGC  
CCAACGATGGATTCAATGAGTTCTTGCCAATAACACGGCCGCTGAATAGAAACATTAA

ACTGAAAGCCAGACAAAATGAGCACCTAGGAAAAAAGGCCATATGCCGATAATGAAGA  
ACCATAAGACTGAATTACCTGAGATGCCGTGTGCCCATAAAAATCCCGGAGCCACCCATT  
AATAGTAATGGAACCTCTGTGCAAAGTTTCTCCCGTAATATGAGTTACCACCCCTTGATC  
ACTTATACCTACCCCAAAACATCTGACTGCATTTTCCAAGTGAATGGAATATTACTACCGA  
AATAGCATTGTACATCCAGAATAGACCTAAGAAGACATGATCCAGGCAGATACTTGACA  
TGTCCTCCCTCTTCCAGGTCCATCACAAGGGAACGAAAACCAAGATTGCTTTATCAGG  
TATCAAACGTGAGCTACGAGCAAATAGAACACCTTTTCACTAGTATCAATACGGTCACATG  
GATCGTAAATGCATGAATGTGATGTACCAAAAAATCTGCGGTTCTTAATGGAATAGGTAA  
CAAAGCGACTTTGCGCCTACTGTCTACTAAATCACCACCCCCCAAGTCAAGCTGGTGCT  
TGTGTTGCACCAGGAGCTGTTGCACCAGGTGCTAAAGCGTGGGTGTTTTGTACCCATTG  
AGCAAAGATGGGTGTAAATTGTATAGCGGTATCTGAAAACATATCTCGGGGACGCCCTAA  
AGCGCTCATGGTATCATTTATGAATATACAAGCCAAAACCTGTGAAAGCCTAGAAATATACA  
TACCCAGTTGAGATGTGATATGATTGCATCTCGGTGTCTAAGGACACGATCTAATAGATC  
GTTGTATCGAGTAGTTGGATCATAGTCTCTTACCATAAAAAATGGCTGCATGTGCAGCAGC  
ACCAACTATGAGAAATCCAGCATCCACATGTGATGTGTGAACAACGAAAGTTGTGTACC  
ATAGTCAATAGCTAGGTATGGATAGGGGGGCATGGAATACATATGGTGAGCTACAACAAT  
GGTTGAAGAGCCTAACATAGCTAGATTAAGAGATAATTGAGCATGCCATGACGTTGTTAG  
GATCTCATAGAGCCCTTTATGACCCTGGCCCGTAAATGGGCCCTTTATGCGCCTCTAAAT  
ATCTTTCAGGCCATGACCAATGCCCCAGTTGGTCTCTATACATGTGACCAGCTACCAGGAA  
AAGAATTGCAATAGCTAAATGATGGTGTGCAATATCTGTGAGCCATAGACCCCTGTTTAC  
TGGATCTAATCCTCCACGAAAACTAAGAAATTCGCGTATTTTGACCAATTCAAGGTGAA  
AAATGGGGTTGCTCCCTCGGCAAACTGGGATAAGTTGAGCCAAAAGATCCCGATTCAA  
GATAAATTCATGAGGAAGTGGTATCTCTTTAGGATCCACTCCAGCGTCTAGAAATTGGTT  
AATCGGTAAGATACATGTACTTGGTGTCCCGCCCAAGAAAGAGACCCAAGCCCTAGTAA  
CCCCGCTAAGTGGTGATTCAACATGGATCCACATCTTGGAACCAAGCCAATTTTGGGGC  
AGCTTTGTGATAGTGAACCAACCGGCAAAAAGCATTAAAGGCTGCAAGACCAATGCACC  
GATTGCGGTACAATAGAGTTGTAATTCATTAGTTATTCAGATGCTCGCCAAAGCTGAAA  
AAAACAGAGGTTATTTGTATTCTCGGAAACCCCGCCACATCACCATTCAATATTTTC  
TTGACCTACTATTGGCCAAACACCTGGGCGCTGGGTCCAATGTGAGTAGGATCACCTAG  
CCATGCTTCATAATTAGAAAAACGGGCGCCATGGAAATACATACCCTCAGCCAAAGAAA  
AATGATGGAGAGTTGACCGAATGAGCACTAAATACTTTTCGAGAGATCTCCTCCAAATC  
ACTGGTATGGCTATCGAAATCGTGAGCATCAGCATGAAGGTTCCAGATCCAAGTGGTAGT  
ATCAGGGCCCTTAGCTATTTGTTCTTGAGAAATGGCCGGGTCTGGCCCATTCCTCGAAAGA  
AGTTTTTATGGGATCCCTATCCACCAAATCTCACTTCTGGTTCCGGCGAACGAATAAT  
CATTGAGTCTCTCTTTTCCGGACAACACATACAAAGAAACCCGCCAACAGTCAAGTAAT  
TAGTGAACGATGGGTATTTATGATTAGTTTCTTATCTTTCTATCCCCCATCTATCTTT  
TTTTTTTTTAGTTATTTTACTAGAGCAATTATGATATGGAAGTCGATCCGGGGCAAGGTTC  
GGATCTATTATGACATAACCATGGGGCGCTCAACGGACCTTTATAATATTTTATAACCCC  
CTCCGGCGTGACACAAAACGGATTTTTTTGATACAAGCTAGTTAGTGATTTCATATCTCA  
ATGTATAGTATCTAGATGGATCTACTCATATCTTACACGGAACATATTACTTACAATAC  
AAATCAAAGGATCATTTCATTAGTCATTAATAAGAGACATCTTGATATCTATATTTAGTCA  
TTCGAGGTCTGTCTTTTCTTAGCTTAGCTTATTAGCATAGCAGAGGGAATATTTTC  
TGTAATGTATCCGTATCGTTTATCCCTATGACAGACGAAATAGAACAATCTTAGACTTAG  
AAGGGATATAATGAAATTCCTGATTGGCTCTTCTTAGAGGAACGATCTATTTTATTTGA  
TTGATGGATCCCATATTTATAATGAATTCAAAAGAGAAATGTTCTTATCAAACCTCCTTG  
CGATCTTCAACCAATTATGTGCTTCAATATAAATCCCCGGAGTAAGCGCTATAGCTTGTT  
TCCAATATTGAGCAGCTTGATCGGACCAAGCCTCTGCAATTTGAGAATCTCCTTGTCGAA  
TGGCCTGTCTCCCCGGTCGGAATAGGTGGGTCAATTCCTTCCCTTAGAACCGTACTTGA  
GAGTTTCTACCTCATACGGCTCGACATTTCTTTGGTGTTCATCTTAATCTACCATATC  
TAACTGAATGAGATTTCTCATAAATCTATCCCATTTTTTTTTTTTCGGGTTAACGAGAG  
AGGTTAATTACACGAGTTTCAAACCTCTAATTTTGATCAATAATCAGTTTTCTCTTTCTC  
CCACCTTCAGAAGAACCAAGCATAGGTATTTTCTCTATCGTTGCAATTTTCTGAAAGGT  
AACTATCTCGGTTTCATATAGAATTCATATAGAATCTTTGAAAAAGACTTTCTCCATA  
AGAAAGAAAGGACTTACTATCTTTGGGATCTGATGCTACACCGCTGCTCAATACCTTAGT  
AGATCGACTCTATTACATAAGTTGATTCTTAACCTTTTATCTCATATCATGACATTAAGTA  
AGCAGTCCTTATTGTATCGGTCCCCGAACCTCACTAATTGATCTTTACGGTGCTTCTCT  
ATCAATTAGATCCTTTATCCATAGAATAAAGTATATAGGCCATACCTATTTCTTCATATT  
TCGGCTCTTATGAAAGTCTCTTTCTTTGCTACAGCTGATAAAAAATCGTTGCTTTGGACG  
GCATATGTAGAAAGCCTATTTTGTCTTAGTATTGACTAGCGGATTTGGTCTTTCTCTCC  
TTCTTTCTATAGTGTAGATAGTCGCACGTAATGACAGATCACGGCCATATTATTAAGGC  
TTGTGGTAAGAATGGATTTCGTCTATTGCCCCGAAATAATATCCAAGCCTTCGTGTG  
TTCTCCGTACTTGTGTGGATAAGGCCATGTTATAGAGTATATAACTTCGATCATAGGG  
ATCAATTTCTAGTCGCTAGCTTCATAATAATTTGTAAAGCTTCGCATAATTTCTCTC  
GGATTGAGCTGACATCCGTTACGGTCGTTTCATTCTATTCAAAGAATCTCCGTTCCAGAAC  
CGTACGTGAGATTTTCATCTCATACGGCTCCTCCCTTCTGTGCATAGTAATAAGGGGAAT  
AATCCATGGAATCAAAAAGATTGAAATATTCTCATTATGAACTGACAGGGGTGGTGTT

TTTACAAGAAATCTCTAGCCAGCCTTCCTGCAAGAGGTCTGTCTTTTCTTAACACCAAGC  
GCGTTTGTGCTAGATAGAAATGGTAACCTCCAACAATTTCTTTGTCTCAACGCCCCCTGT  
TTCCAGGAATTAGTCACTTCAACGACCTTTGATGGTTATACGGGTATCCAAAGTACGAAC  
GAGATGGATGTTTGTGTGCCCAACCATCTTGTGTAGTTCCGATCCCGATAAGGAAAAGGG  
TTAATTTATAACAAAGTTTTCTGTGTGTGATTTCTAGATGTAGTGCTTCTTCCCCTATG  
CGGCCTATTGGTACTAGTGGAGTAGGATTGACCCGCAATACAGAACCTATAGGTGTAACC  
TTTCGCTCAATACTAGAAATCGACAGTTGAAGCATCTAAGGCTGCATCAATCGGGGATACA  
CGACAGAAGGAATTGTTCTATCTCCAACTTCACCTTCATCAAGCGTAGGTTTATTTCAA  
GAATCTTTTTTCTTTGTATCCCGAATCATGTCTTTTCTCGTAAGACTGAGGGCGGTAAA  
TAAATAAATTCAAAAAAAAGCAAATCGCACCATCTCTGTAATAGGTAAATGCCTCTTT  
TTCTCCTGAGGTTGTCCGAATTATTTCGTAATAAGATATTGGCTACAATTGAAGAGGTCTT  
ATCAATAAAATTTCCATTATTCGAGATCTAGGCATAGTTAACAATCCATTCTAGAATTC  
TTCTCATTACCCCTCAGGGGAAAATGATTCCACAAACAAAGGAATTGTACAGTACGAAAT  
CACATAAAACAGACTCATTCTAAAAAAAATGTGGACCTTCCACTCAAATTATCCCT  
TTTTGAGAGGTATAAATAGGAAATATTGAATCGGATTGGATTTCATGAAATTGAGTAG  
TATACCAATGAATGGAATCTTTTATTTATCGAAGTTAAGAAATCCAGGAATTTTACT  
ACCGATTCTTATAATTTAATTCGAGAAATTTGGATTTGATTATGATCCAAAGAGGAAAA  
GAATCAATAATCATTCCATGATGAAATAGATAACCATCCATTTTGTGTGCATAGTGT  
GGATACACCATCCAATCGAAAGATAAAATCTATAGAACGATTTCATGAATTGTAAATAGA  
TCTATGGAGTAGTCAATGAGAGGAGTTGTTGTTGAGAAATCTGAAACTGGAAGGGGGGAA  
TTTTGTAATTCCTATGGAATCGTAGTTTAAATATAAACATAGTCTAAAATAGGGTCAGTT  
GACTCGTTCCAATTCATTGGCTTAATCCGAAATATTAGAATAAGATAGGATCGTCGTATT  
GACAAACAGACATTTTTGTTTTTAAACAAGAAAAAGTGTGTTTTTTTTATCCCTCGAGC  
CTCGAAGGAAAATCGTTCTTTAGCGAAAAGTTTTCTATTTCTAATAGATTGGTCGTACCT  
GTATTGCAATAATATGAATGACTCGCTATTTACTCGGTTTCTGGGCATAATAATAAGAT  
TATGTAGGAGAGATGGCCGAGTGGTTCAAGGCGTAGCATTGGAACGCTATGTAGACTTT  
TGTTTACCGAGGGTTCGAATCCCTCTCTTTCCGTACCTTCATCTAATTCACCAACCGACC  
ACAATGTATCAAAATCAAAATAACAATTGATACCATTATTCCAACAGTAAGACCTTATTG  
ATAGAGATTCTCTATTCTAATTAAGTGCAGTACGGAATAACCGAATAGAGTGGAAAGG  
AATGAAAATCTCACTGCTGATCCATTTGTGATACGTGAATGGGAGAAAAATCCGGATCAA  
ACCCCTTCTTCGTTGAAAAAAAAGAGGGGGGGGCAAAATGGTCCGAAGCTTTGTT  
ATTTTAGTTAGGTTCAAGTCTGACGGGAATAATATTCTACGACTAGAACTCATTGATTT  
TCAAACCGATCCATTTAATATCTATTATTTGATTTACTAATCCTTTATATTGGGATGAGT  
CAAAAGTCAAATGTTTTGCCAATCCTCGCGGGCGATGAATCAAGATAAATTTGAATCA  
GAGCTCTGGATCTTTGTTTCATCCCTTGACAGTAATAATATCTCGGGGTTTGCAGCGATAAC  
TTGGGATATCTACTACACGACCATTAATAAAATATGTCTATGGTTAACTAATTGCTGG  
CTCCAGGAATGGTTCGAAGCCATACCTAATCGAAAAAGGATGTTATCCAAACGCATCTCAA  
GTAGTTGTAGTAAACCTGACCTGTTGACCTTTGGCTTTTCCGGCAATACGAACATATC  
TAAGCAATTGTCGCTCTGTGACACCATAATGAAACGCAATTTTGTTTTTCTCTAGAC  
GAATACGATATTGAGATCTTTTCCCGAAACGTGATTGGTTTCTAAGATCACTTCCGGATC  
TAGGCTTTTTACTAGTTAGTCCCGGTAAAGCCCCAGACAGCGTATTTTTTTGAAACGAG  
GCCCTCGGTAACGAGACATAAAGACTCCTTGTAAATTTGATTTTACAGAATAAACTTA  
AATTAAGACTGAACTAAACGATAAACGAACTAAATCTATTGAAGTACTACAAAAGAAGA  
CTACAAAAGAAGAATGAGATGAATTGTATCAATATCCGGATTATTTGTATATATAGGAA  
GTGAAGGACCCCTTTCTGTGATTGTTCTGTAGTGTAGAGATTAACTGCTCCAATCAAAT  
AAGTTTTTTATTCATAGTTGGAAGTTGCTACGACATAATAGATCGGTGACCCGACATTTT  
TAAAAGAAAAAAGAGAGGAGTCTTTTCAATATTCCTTGAGATCAAGGAATATTGAAAAG  
CCGGCTATCGGAATCGAACCGATGACCATCGCATTACAAATGCGATGCTCTAACCTCTGA  
GCTAAGCGGGCTCACATAACAGAAATAAGTGAATAGAACTAACTAACTATATCTATATA  
GAATGTTTTTTTTAATCTTAATTTATATATTATACTTAATTTATAGCAGTTAGTTATAG  
CAGATTAGATTAATCATATTAGAGCAGATCGGTACTAAGGAAAGGATAAGATAAGGATGC  
AATCCAGATCATAATGAGACATTTCCCGGTTTCATTTCAGAAAGGGGGAGGTAGAACGA  
AAAAAAAATGAATATCGAACGTTCCAGTATTAATAATCGCGCGGAAAAATGAGAGGG  
GGGGAGGGTATGTATATGTGGGATATCTCTATCCATATTGAATTGCAGATACATCAATGA  
TAGAATCATTTCTGATGGGACCAATACGGGTCTTCCGATAGAGAATATGGACAAGAAAT  
CAAAATAAAATAAATAAATAAATAAATAGGAGTAGACTTTTTTTCGATATTAGGAATCA  
GTATCTAATGAATTCAACGGTTCGACATAAATAAATGAAAGAGGGGGATGGGATCACAA  
TGAGATCTCGGTCTCAATAGGGGATATGGCGAAATTGGTAGACGCTACGGACTTGGTTGG  
ATTGAGCCTTGGTATGGAACCTACTAAGTGATAAATTCCAAATTCAGAGAAACCTGGA  
ATTAAAAATGGGCAATCTGAGCCAAATCCTGTTTTCAGAAAAAAGGGTTCAGAAAGCG  
AGAACCAAAAAAGGATAGGTGACAGACTCAAAGGAAGCTGTTCTAACGAATGGAGTTG  
ATTAACATTGGTATAGGAATCCTTCTATCGAAATTCAGAAAGGATGACCTTATCCTATA  
TACGTACTGAAATACAAACAATTAATCACGATCCGATTCGTATTTTTTTTATATGAAA  
AATGGAAGAATTTCTGTGAATCGATTCCAAATGAAGGAAGAAATCGAATATTCAAGTATC  
AAATCATTCACTCCTCGGATAGATCTTTTGAAGAACTGATTAAATCGGACGAGAATAAAGA  
TAGAGTCCATTCTACATGTCAATACCGACAACAATGAAATTTATAGTAAGGGGAAAAATCC

GTGACTTTAGAAATCGTGAGGGTTCAAGTCCCTCTATCCCCAATAAAAAGAAAAGAGCC  
CGTTTTACTACCTAACCTCTTTATTTTCGTATCGGTTCCAAATTAGTTATGTTTCTTATT  
CACCCCTACTCTTTCACAAACGGATCCGGACAGAAACCTTCTCTCTTATCACAAAGTCTAT  
AGATACGATATATACCTACAAATGGAACATATATAGGCAAGGAATTTCCATTATTAAATAATT  
CACAGTCCATATCATTACTCTTACACTGACAAAGTCTTCTTTTTGAAGATCCAAGAACT  
CCAAGGCTTAGGTAAGATTTTGTAAAGTCTTTTGGGTTCTTTAATTGACATAGACCCCA  
GTCCTCTAATAGGGCGATGCATCCGGAATGGTCGGGATAGCTCAGCTGGTAGAGCAGAGG  
ACTGAAAATCCTCGTGTCAACAGTTCAAATCTGGTTCCTGACACGCGGTTAATGTATCGA  
ATGGATACTCATCCAAATGAATGGGTAAAGGAAAGAAGTAGATTTTGTCTCTTTTTTTA  
TACTGTACCCCTCTCGCTCAAAAAGAAATGTTAATACTTCATACATATCCAAGTTAGGT  
GGCTGAAACCAAAAAGTCTAGCCTAGGGGAGTTGAAGGATAGGAATAGACAGGATTCATT  
TCAGATACAGTACAAAGAAAATACGATCCCTTTTCATTCTGAATTTTCATATTTCTTGC  
GTATTCATTTCTCACTCCCTCTTACGCGACTTCCAGGAGCCCATCCAAGTGATATGCG  
CGGTACAAAGTTTCATGGTACAGAACTCTTTGATTTCATACTATTGGCTTTACTCATCCGA  
AATAGATATATTTAAATTTGGGGAATATCAACGAAGCCTATTATTAGCTCATCCATAAT  
ACGAATTAGAGCCAGTTACTCTGTTTCATCTAGAACGTAAAAAGATTCCTTGAATATCT  
GGAGTCGTAGAAGTGAAGATTAGTTTCTTATCATTCGAATGAGCATCTTGTATTTCATAGA  
AATTGGGGGCAATATAATCCTTACGTAGGGGCCATCCACCCAACTTTCGGGCATCAGA  
TACGTTTCAGGCGTGGATGATTTTCATAAGAGATCCCCAACATATCATAAGATTCCCGTT  
CTTGAAAATCAGCACTTTTCCAAATCCAGAAAACAGACGGGATTCTAGGATTCTCCTTG  
GAACAAATACTTTTATGCACACCTCTTCGGGTTGATCCACCCATACTGTATTCTCGTAA  
GATGATACACACTAGCTAAAAATCCGCCAGGTGCTACATCATAGGCACACTGGAAACGTA  
GATAATTGTAACCATATACATATGAAATAACAGCAATGGAGTACCAATCCTCGGGCTTTA  
TTTGTAAGTCTCTCTTCTTGGTAATCGAAGCCCAAGATCTATGAAGTACTCATGCT  
TGACTAGCCAAGCAGATAAACGACCTGCATCTTCTTGATCTCTCCACATTTGTATGAA  
TATTTTACATTTACGATGAATTTTATGAAAATGACTCGCCGTTTGTATTCCGCACAAA  
AACACCTGCCTAATTCATTAATTTGGGGGAAGATACTGAACCTTTGTATTTGAAAAATG  
TTTCAGAAAGGTATCTCTGAAGTAGATGGAGATTGGTAGAGTAATCCTTGATCGTAATTC  
CAGTATGAGTACTGTGTCCAACATGAACTTGTGATTGGTAGTAAAAATATCGATTTTCT  
GTTGAGACCAATTCTATCTTCATAGATTTCTCGAGAGACTTTCTTACGAAGTTTCGTTA  
TAGCATCTATAAATCGCCTCTGTTTAGGGGGGAGCCCGGCAATAGACATCCACAGGAA  
TTAGCTTATCGACTCCCCGAACAGTACTATAAGAATCGGTACTGAACATCCCTCCTGTAA  
TAGTACAGGCTCCCATAGCAATGACATATTTTGGTTCGGGCATTTGTTTCATATAATCTCA  
CTAACGAAGGAGCCATTTTCATTGTTACTGTGCCGGCTGTTAAATTAGGTCCGCTTGCC  
TAGGACTTGATCTTGGTACCAGTCCATAACGATCAAAATCGAATCGCGAGCCTATTAATG  
AAGCAAACTCAATGAAGCAAACTGGTACCATAAAGAAGCGGCCATAAACTAGAGAGTC  
TTGACCAATTCGAAAGATCATTCGATGTAGTTGAAATAACTGAATTTGGGCGGTTTCGGT  
CAAGTAACGGAACTCAATAGAATTCATAAATGTTTCAATGTAATCTTTTCTCTTTTT  
GATTTTGATTGTCTGAATATTCAGGAGCTAAGACCATTCCAATGCTCCTTTTCGCCATGC  
ATAAATGAACCAACAATTTGGGATAAGCACGAAAATTAAGCTTCTATAAACACAGATAC  
ACCCAATACATCGAACTCATTTGCCCATGGATAAAGAAAGACTGTTTCAACATCAAAAAC  
AACAAAACCTAGAGCAAACTGTAAATAGCGGATTTCGGAATTGTAACCAAGCATCCCCAT  
CGGTTCTATGCCCGATTCTAACTAGAGAGCTTCTCTGGTCTTCACTAATCGGGGCCAA  
AACTCCGGAATTAGAAATGCCAAAATAGGAATAACACTTGATATTATTAGAAATGCCCA  
GAAAATATCATATTCGTGAAGCAGAAACATAGAAGCACTCCTATTAATGTGGAATATACC  
GAATTAGTTGATTCAAAATGGAATTCCTCAATTCATCCATAACTGCATTAGTCGAAACAAC  
AATTTTGATCAAAACCATAGTTTCGTTTGTACTTGTGTGGGTCATGTATCGTCTCA  
AGATTCATCCAACGGAATCCCACTTACACTTACTTCGATTCTATTTAGATATGGTGTAGA  
CATATAATGCTATTATACAAATCAAACCTCTCTCCTACCTTGCCCTCGGGTTTTCTATCAA  
CAAAAAAGGAATTAAGGAATTTTTTTTAAAGAATATTTTAAATAATATGAATTGAAATT  
GAAATAATATTCAAACAATATTATTCAAATAAGATTAAATGAAATATTAACATAAATAA  
TTTCAATATTCTATTAATATAATAGACCAAGAGGAGTCTGGCCCATTTTTTCTCTCT  
CTCTCTTTTTTTTTTTTTCTTAGTGATTTAGAATATAGTCAGTAGTCAGATGTAATAGA  
ATTTCTAGGAATTTCCATCTCGGGATTTATGGTATATTCTACGTGGCTGTGTTGGTGTAT  
TCTTTTCATTAAGATCCGGATAGAGGATTATTGTTTCTATTGATTGTATACGGATACGAA  
AACGGAATGCATCGACCGATTTCGATTCTCTCTCCTGTCCAGATTTATACCTAATTGAT  
TTGATTCAATCCATTGAATTGTGAGGAACCTTACATATAAAAACCTCATGGGTTCCTATA  
CCCAATTAGGAACCTTTGGACCTGTACTACCCCGGCCCGGCTTTACCCCGAGTTAGA  
AGTCTTGAAAGAATCATTTTCAGACCATTTCTAGGACTAAAGATCGTGATTGGAATGAC  
TCGAAATACTTATTTATTTAATGTAATAATAACACCTAGCAGGACCAACCAACGAGTTAG  
GTTTCGTGACAACAAAAACGTTTCTTTGAAGCAAACCTACAAAATGGGGCATAGTTTA  
ATGGTAGAGTCGGCTGAATCGTAAATGATTTACAGAAGATACTTCGAATGGAATCATGCG  
TTGTCGAACGATTCGATAGACAAAATCTCCCATCCCAAAACCACTCATAGAACATAGA  
AATAGAAGAGGGTGCCTTGATACATTTAGGACCAATTCATTGTCTTAAAACAATGAATT  
GGGATTGTTGTTCTGCCAAAAGCGGATACGTGGGGGATTCCTAACCTCATCCAAGTTCAA  
ATGGACCTAATCTTTTTAGATAAAGTCTGCATTGGTAGAATTGGAATGATGAACAAATT

GGATTGGGTAGATTGGAATAAAAAAAGAAGTTATTAAGTATTGTACAGAAAAATGACTA  
CTTGCTTTTGCTAAGCCGGTTATACGAAGAAAAGCCTATTTGTACAATGAAACTTACCAAAG  
AGCTTCGTTTTTGAAACTCTGGCTTTTCTACAATAACAAGAACAAGAATAGGTTCTAGAT  
AATGTGACTTACTATTAGATTGAATTTGGATTGGATTGGTTGGGTGAGTTGGAGTTT  
TCTTGAGCCAGGCTCATGTTATGATTTTGACTTCATAAATTGGCTTGGGTATACCAAAGC  
AAAGGTGTATCACTAAATCTTGATCATGGACAATAAAAGAGGAAAAAGGCCGTATGTC  
ATTCACAGACGAAGATTAATGAAGAAGAATGGGTTTGTATCCGAGATTTGAAAATACC  
GATCCGATTGGATCCATTGGAATAAATTATTGTTTTCAAGCCCCGAGGGATCTCCGTGAT  
CCTGTGGGAATGATTCCATTTCTATGGAACAATCAACCGCCGGTACACGCACTAATTA  
GGAAATGAATACAAAAATGTATAGGGCTATACGGACTCGAACCGTAGACCTTCTCGGTAA  
AACAGATCAAACCTATTATTATCGAAATGATTGAACTGTTTCAAAGACCCAACATGCG  
TTTTTTTTTTGCAATTGGGCTCTTTCATTAAGTATAAAAGATCGGCTAGTCCACCATAT  
TTTTTCTTGACAGGAAGATAACGAGATGGCTCCATGCGCTCGGATTCAATTATTGAATTC  
TGATCCGGGAGCAATACCAAAGTGTTTCAAAGAAGGGTTACCCTGACGTAGGTCTGCCTC  
CGGCTTAGATCAACCTAAGTTAAATGGAGTCTCTATCAATCCGCCCAAGAGTCAAATAT  
GATACTTAATACACCTTAAAGTTCATAGGACGAAAAGAGGTTATTTTGAGTCCCTTATCC  
TCATTATGCCCTAGCATTGAAGGGACTGGGTATTCACCTTATCAATGATCAAACCAATGAT  
GGGTTCTATTTGGTACCTGAATTGGCACCTGAATCGGACCGAACAAAATATTTGTGAGGC  
TATTGTTCTCTTGTTCCCTCGAATCCATGGAGTAAGACATCGATTTCTCAATAAGATCAA  
TTCTGTTGATTGGCATGATGGACTCCCTCGAAAAGCATTTGGCGCGCGTGTAACGAGGTG  
CTCTACCTAACTGAGCTATAGCCCTTGTCATAGACATATTAACATCTAGATAATTTCTTG  
TCAAGATGGATATTCCATAATCCACATGATAACTCTCCGATCCGTTTCTGCCAAGGAT  
TGGTATTGCTGAGAAGTAATATCCGCTATAATCCCGATGTGATGGGTCCATTTTCT  
CTTCTCTTTGTGATGATAAATGACCTACTTAACCCAGTGGTTAGAGTATTGCTTTCATA  
CGGCGGAGTCATTGGTTCAAATCCAATAGTAGGTAGAAGTATTAGATACCGGAGTCTGA  
TGGTATCTAATAAGTTTTTCTACCCACCTTCTCTCTTTTTTTTTTATGGATTTTGTACC  
CTTTCCTATTATACCCCACTACTCATATTTGTATTTGTTTTTTTTTGTTCGTTACAT  
CAGATTACAATTGATTGTATCCAATTGGCGGAATCCAATATGGTGTATAAACAGAACTT  
CTTTTGATTATTTCTGATACATTGACTAGTACGAAATAACATTGATAGCCTCTACTCGTGT  
CCTAGCTCGTCTAAGAGCTAGATTGCGCTCAATTGCTTGTCTCTTGCCCTCAGCTCTACT  
CAAGTTAGCTTCAGCTATTCTAAGAGTTCGCTGAGCTTCTTGTTGGATCAATGTCACTACC  
CTTCTCTGCATCATTTACTAAAAATGGTGATCTCATTATTGCCTATTCTAGCGAAACCGCC  
CATCACAGCCATCGTTAACCATTGGTCGTTGAGGCGTATTCTCAAATACCTATATCTAC  
GGCTGTGGCAATAGGGGCGTGATTTGGTAATACGCCAATTTGGCCACTATTAGTAGATAA  
AATGATTTCTTTCACTTCCGAATCCCAAATAATTGATTCGGAGTCAGTACACAAAGATT  
TAAGGTCATTTCTTCAATTGCTCTCCACTTCTAAGTTCATAGCCTTCGAGTAGCTTCA  
TCAATGTTACCTACCAATAAAAGGCCCTGCTCGGGAAGACCATCTAATTCTCCGAAAGG  
ATCAGTTGAAACCCCTAATTGTTTCTGTAAGACCAACATATTTCCCTGGAGAACCAGTA  
AATACTTCTGCTACGAAGAAGGGTTGTGATAAGAAACGTTCAATTTTTCGTGCTCTTGCT  
ACGGTTAAACGATCCTCTTCAGATAATTCGTCCAACCCAAGGATAGCTATAATGTCCTGA  
AGTTCTTTGTAACGTTGTGAAGTTTGCTTAAGTCTTTGCGCAGTTTCATAATGTTCTCTCA  
CCAACGATCCTAGGTTGTAGCATAGTTGACGTTGAATCTAACGGATCTACTGCTGGATAG  
ATACCTTTTGGCAGCTAATCCTCTTGATAGTACGGTAGTAGCATCTAAGTGCACAAATGTC  
GTAGCAGGAGCAGGGTCGGTCAAATCGTCCGAGGTACATAAACTGCTTGAATGGAAGTT  
ATAGACCCCTCTTTGGTAGAAGTAATCTTTCTTGCAAAGAACCCATTTCTGTACTAAGG  
GTAGGTTGATAACCCACAGCGGAAGGCATTCTACCTAATAAGGCGGATACTTCTGATCCT  
GCTTGGAGCAAAACGGAATAATTGTCGATAAATAGAAGTACGTTCTGTTTCAATTAACATCC  
CGAAAATATTCCGCCATGGTTAGGGCAGTCAACCAACTCTCATAACGAGCTCCCGCGGT  
TCATTATCTGTCCATGGACTAGAGCTACTTTGGATTCTGCAATATTTTGTTCATTAATC  
ACTCCGGATTCTTTCATTCCATGTAAAGATCATTTCCCTTCACGAGTACGTTGCGCTACT  
CCGCCAAATACAGATACACCTCCATGAGCTTTGGCAATGTTGTTGATCAATTCATGATG  
AGTACTGTTTTTACCCACCCAGCTCCCCGAATAGTCCGATTTTCCCTCCACGACGATAA  
GGGGCTAAAAGATCTACCACTTTAATCCCTGTTTCAAAGATTGATAATTTGGTATCTAAC  
TGGATAAAAGCAGGCGCAGATCTATGAATAGGAGATGTTGTGCGAGTATCTACAGGACCT  
AAATTATCAACAGGCTCTCCAAGAACGTTGAAAATTGCTCCTAGAGTAGCTCCACCCACT  
GGAACGCTTAGAGGAGCTCCCGTGTCAATCACTCCATTCCTCTCATCAGACCATCTGTA  
GCACTCATAGCTACAGCTCTAACTCGATTATTTCCCTAATAATTGCTGGACCTCACAAGTC  
ACATTAATTTGCTGACCGACAGTATCTCGACCCCTAACTACCAAGCGTTGTAAATATTA  
GGCATCTTGCCGGGGGGAAAAGCTACATCCAGTACCGGACCAATGATTTGAGCAATACGC  
CCCAGGTTTTTTTCTTCAAGTGTGGAACCCCGAGCCGAGAATTAGTAGGATTGATTCTC  
ATAATAATGAAAGTGAATATGTCAAATTTTTTGCGAATATTACCGAATCGAAAATAAA  
TGTCGGATAGCAAGTTGATCGGTTAATTCAATAAATAAGAAATGGGAGTTAGCGCTTGAT  
TTCGTTGGTACCATTCAACTGAATCCAATCAATCGTTTACTCATTCAATGAATTT  
TCAAGTTCAACCAACCTTTTTTCAAATATCTATCAATCAAGTAGATGAATAAGAAATCA  
TGGGGAAGTCTTTCAATTTTCTATCATTATAGACAATCCCATCCATATATCTATGGAAC  
TCGAACCTGAACCTTATTATTATGATTGAGAAATTTCTATCTTATTGGCCGTTGTTCCCTTATT

TCAGCATATTAGTTTCCGCCTATTCTTGTTTTATTTTTTATACCCTTTCATGGATGAAT  
TCTGCCTATTTTACATCTAGGATTTACATATACAACATATATCACTGTCAAGGGTGAAT  
TTCTTATTATTAGATTCAAAAAAAGAAGGAGATCCAACTTGCAAAACAAGGATTGG  
GTTGCGCCATACATATGAAAGGGTATACAATAATGATGATTGGATGATTGGCAAAT  
CAAATACCATGATAACGAACCATTCTAATTAGTTGATAATATTAGTTGAGAATTTTGTA  
AAGATTCCGTGAAAGGTTTCATTCATTACTAATCCATGTCGAGTAGACCTTGTGTTGT  
GAGAATTCCTAATTCATGAGTTGTAGGGAGGGACTTATGTCACCAAAAACAGAGACTAAA  
GCAAGTGTGGATTCAAAGCTGGTGTAAAGATTACAAATTGACTTATTATACTCCTGAA  
TATGAAACCAAGATACTGATATTTTGGCAGCATTTCGAGTAACTCCTCAACCCGGAGTT  
CCACCTGAGGAAGCAGGGGCTGCGGTAGCTGCCGAATCTTCTACTGGTACATGGACAACT  
GTGTGGACCGATGGACTTACCAGCCTTGATCGTTACAAAGGACGATGCTACCACATCGAG  
CCCGTTCCCTGGGAGGAACTCAATTTATTGCCTATGTAGCTTACCCTTTAGACCTTTTT  
GAAGAAGGTTCTGTTACGAACATGTTTACTTCTATTGTGGGTAATGTATTTGGGTTCAA  
GCTCTACGAGCTCTACGCTCGGAGGATCTGCGAATTCCTCCTGCTTATTCAAAACCTTC  
CAAGGCCCGCCCCATGGAATGCCAAGTTGAGAGAGATAAATTGAACAAGTATGGTCGTCCC  
CTATTGGGATGTACTATTAAACCAAAATTGGGGTTATCCGCCAAGAACTACGGTAGAGCG  
GTTTATGAATGTCTCCGTGGTGGACTTGATTTTACCAAGGATGATGAGAACGTGAACCTC  
CAACCATTATGCGTTGGAGAGACCGTTTCGTATTTTGTGCCGAAGCAATTTATAAAGCG  
CAGGCCGAAACAGGTGAAATCAAAGGACATTACTTGAATGCTACTGCAGGTACATGCGAA  
GAAATGATCAAAAAGGGCGTATTTGCCAGAGAATTGGGAGTTCTTATCGTAATGCATGAC  
TATTTAACGGGGGATTCACCTGCAAATACTACCTGGCTCATTATTGCCGGGACAACGGC  
CTACTTCTTCACATCCATCGCGCAATGCATGCAGTTATTGATAGACAGAAGAATCATGGT  
ATGCACTTTCGCTACTGGCTAAAGCGTTACGTATGTCTGGTGGAGATCATGTTACGCT  
GGTACCGTAGTAGGTAAGTAACTAGAAGGGGAACGGGACATCACTTTGGGTTTTGTTGATT  
CTACGTGATGATTTTATTGAAAAAGACCGAAGTCGCGGTATTTATTTCACTCAAGATTGG  
GTCTCTATGCCAGGTGTTCTGCCCGTGGCTTCAGGGGGTATTACGTTTGGCATATGCCT  
GCCCTGACCGAGATCTTTGGGGATGATTCCGTACTACAGTTCCGGTGGAGGAACCTTAGGA  
CACCTTTGGGGAACGCACTGGTGCAGTAGCTAATCGGGTGGCTGTAGAAGCGTGTGTA  
CAAGCTCGTAATGAGGGACGTGATCTTGCTCGTGAAGGTAATGAAATATCCGTGAAGCT  
GCCAATGGAGCCCTGAGCTAGCTGCCGCTTGTGAGGTATGGAAGGAGATCAAATTCGAA  
TTCGCCGCAATGAGATACCTGTAATCCAGTAATTCGCCGTTTCGTTCCCTAATGTAATTA  
AACTCGGCCCAATCTTTTACTAAAAGGATTGAGCCGAATTAAGAATGAGGATCCTATGT  
ATATGGATAGATATAGATCTTGTATCTATCAATATGTGCCTACTTTACCTAGATATACAA  
GATCTAAATACAGATAAGATCTAAGACTAAACAACCTCAATGCTTCTATTGTTGGATCCA  
TAATTAATCCTATGGATCCTTAGGATTGGTGGATCCTTTCTATCCCGTTGTTTCGGACC  
ATAGATCGAGCCAAGGGTCACAACTTCTTCTACTCATCCTGTATATTGTCCCTTTTCATTC  
CGTGTGCGATTAGAACTTATTATTATACGAGATTATACGAAAATGAATCCTTCCCTAGGA  
GGGAACAAATATTTCTCTTTTCGATGAGAGTTTGTACACAACATGGGAGAAACCTATCTT  
CTATTTATAATAATTGAAGAAAAGGTTCCATCATATCATATATAGTGAATTGATACTCCC  
GATTCCCACAAAATCATTTCTTTCGTTCAATAGTTACTCGTTATTAGTTAATAATCCTAG  
TGATTGGATCTATATGCGTATTCCGATAGGAAATGAAATAGTAAAATGATTTTTCGTCGA  
ATGACTATTCTATTATTGTTTCAATAGGGGGCAGGAAGGATCTATGGGAAAATGGT  
GGTTCAATTCAATGTTGTCTAACGAGGAGTTAGAACACAGGTGTGGGCTAGGTAAATCAA  
TGGACAGTCTTGGTCTGCTCTGTTGGAATACCAAGTGAAGTGAAGATCCATTCTAAATG  
ATACGAATAAAACAATCATATCATGTTGGCGCGAAAGTAATAGTTGCAGTAATGTTG  
ATCATTTTTTCGGTGTGAGACATTTGGAGTTTCACTCTGATGACACTTTTTTAGTTA  
GGGATAGTAATGGTAAACAGTTATTCCGTATATTTTGATATTGAAAATCGGGTTTTTGAGA  
TTGACAATGATAGTTCTTTCTGAGTGAAGTAACTGCTTTTCTAGTTATCTGAATA  
GCGGGTCTAAGAGTGACAATCGCTACTATGATCATTATATGTATGATACTACGTATAGTT  
GGAATAATCACATTAATAGTTGCATTGATAGTTATCTCGTTCTGAAATCAGTATTAATA  
AGTACATTTTCAGTGGTAGCGACAATCCCATTTACAGTTATATTTATAGTTACATTTGTA  
GTGGTGAAGTGTAAGTGATAGTGACAGGGGGAGTTCTAGTATAAGAACTGGCGGTAATG  
GCAGTGATTTCAATATAAGAGGAAGATCTAATGATTTTCGATGGAAATAAAAATACAGAC  
ATTTATGGGTTCAATGCGAAAATTTGTTATGGATTAAATTATAAGAAATTTTTTAGGTCAA  
AAATGAATATTTGTGAACAATGTGGATATCATTGAAAATGGGTAGTTTCAGATAGAATCG  
AACTTTTCGGTTGATTCGGGCACTTGGGATCCTATGGACGAAGACATGGTCTCTATTGACC  
CCATTGAATTTCACTCGGAAGAGGAACCTTATAGAGATCGTATCAATTCGTATCAAAGAA  
AGACAGGTTTAACTGAGGCTGTTCAAACAGGCATAGGTCAACTAAATGGGATTCCTATAG  
CCATTGGGGTTATGGATTTTCAGTTCATGGGGGGTAGTATGGGATCCGTAGTAGGCGAGA  
AAATCACCCGGTTGATCGAATATGCTGCTAATAGATCTCTACCTGTTATTATGGTGTGTG  
CTTCTGGAGGAGACGATGCAAGAAGGAAGTTTGAGTTTGATGCAATGGCTAAAATAT  
CTTCCGCTTTATATGATTATCAATTCAATAAAAAGTTATTCTATGTATCAATCCTTACAT  
CTCCTACAACCGCGGAGTAACGGCCAGTTTTGGTATGTTGGGAGATATTATTATTGCTG  
AACCCAATGCCTACATTTGCATTGCGGGGAAAAGAGTAATTGAACAACATTTGAATAAGA  
CAGTACCTGACGGTTCACAAGCAGCTGAGTATTTATCCATAAGGGCTTATTTGATCCAA  
TCGTACCACGTAATCCTTTAAAAGGTGTCTGAGTGAATTATTTACAGTACACGGTTTTCT

TTCCCTTGAATCAAATTC AAGTAGAGCGCTAGGCTCAGTTATTTGTAGCGAACTTTAGT  
TCATCGGAATCAAAGTCAAATAAGAAGAGTGGAGTTTCTTTGGTAACATAACTTCTAT  
AGGAAGTTTCGGATAATTACTTTTTTGTATGCAGATTTTTATCCTACCCCTATTCATGA  
TTAGTAATCAGGAACCCCTATCAGGAGGAAAAGAGTGAATTCTTCCTCCGCGGAATGG  
AATTGGGAAAAAAATCAAAGAATTCATGTTCCCTTCTTTCATATTAATATATATCGT  
ATTAATATATATAGAATAATTC AATCTATAAGGGAAGTGTGCATATTTTTATATCTCC  
CGAGGACCTACACTTTTGACTATGAATCCTGTGGATCGGATCTAACAAATCCTTAGG  
AAACTCGTAAGAACTCTTTATTAGAAGATAAGGGCGGTAGAACAAGAATAATAAAGCGG  
ATTATCATCCATCTATTCTTGTAGAAAAGGTGAATAGATACACTTATTTAGCTCTACATT  
CCTTGCACCTTATTATATACTTAATAATACTTTATAATAGATATACTTATCATAAGATAAGA  
TATCTTTATAACAGGTACAAATATTAATCGAGGCACCCATTCTATGACAGATTTCAATT  
TACCCCTCTATTTTTGTGGCTTTTAGTGGGCTTAGTGTTTCCAGCAATTGCAATGGCTTCTT  
TATCTCTTCATGTTCAAAAAACAAGATTGTTTAGACCTGATAGGACAAAAATTCATCAA  
TTTATTTCAACACTTGGACTTGGATCATAATAGGGATATCCATTTAGTGGAATATGATAC  
GACATGTGGCCCCCTCCGGGCACAAATAAAAAAGTGATTATACATGCGGATACATTATAT  
ATGGATAAATGCATGTATATGGGGGATAGCTGTTTTAAATGGATCAGAGTGGATATCT  
GAAATAGAAAAGTTAACGTATCTATATTATGTAGATATACATAGTGGTGGTATTATACGAA  
GGGGATGTTATTATTTATATCTAACCAATTCGATGAATTACTCCTAATAGTTCGCGTCA  
TAATAGTGCTAGTTGATGAGAGTTACTTCGGGAGCAAAATAAAAAAGTAAAAATCAAATT  
CATTTGGCTTAACTTCTCTCTCTCAATTCCAATAGGATGCAACTGAATCTAGTATGAAC  
TCGATCAGAACGTATATGGATAGAACTTATAACGGGGTCTCGAAAAACCAGTAATTTCTG  
CTGGGCCCTGTATCCTTTTTTTAGGTTCACTAGGATTCTTATTGGTTGGAACCTCCAGTTA  
TCTTGGTAGGAATCTGATATCTTTATTCCCGTCTCAGCAAATCATTTTTTTTTCCCAAGG  
AATCGTGATGTCTTCTATGGGATCGCAGGTCGTTCATTAGTTCCCTATTTGTGGTGCAC  
AATTCGTGGAATGTAGGTAGCGGTTATGATCGATTTCGATAGAAAAGAAGGAATAGTGTG  
TATTTTTCGTTGGGATTTCTCTGGAATAAATCGTCGCATCTTCCCTCGATTCTCTATGAG  
AGAGATTCAATCGATCAGAAATGGAAGTTAAAGAGGGTCTTTATCCTCGACGTGTCCTTTA  
TATGGAATCAGAGGCCAGGGGCCATTCCCTTGACCCGTACTGACGAAAATTTGACTCC  
ACGAGAAATTGAACAAAAAGCTGCTGAATTGGCCTATTTCTTGCGCGTGCCAAATTGAAGT  
ATTTTGAATGAAGGGAATGAATGCTTTCTCAGCATGAGGGAAGGGACCCAGGAACCCCC  
TTTTAAATATAACTGAACTTCTCTCTCGGAACGTTCAATTCGAGCAAAACATGTTAGATTCTA  
TTTCCCCCGTTCCGTTGGTAATCCTTCTGTGGCCATAGAATAAAGCAGGCGGACGTATA  
CGGAACAACCATAATAAGAAGCAATTTTGATCGACCAAACTCCTTTTTCTGCATATAGA  
ACTCAATTCTACTAGTAACAAGTCTAATAAGTATGTATTCATCACACATATCAGAGCATT  
TCGGAATACATAATTTATCTTTTAGGACCAATACTTTGGATTAATACATTAGATACAGA  
TGTATCATATCCCGTTAATTATCTTTCTTTGTCAATCGATGTTCTTTTTTGACTCTTT  
CTTTAGCTCCTGGATAACCAACGTTTAGATCTCTCATAACTATCCAAATTTCTCTCTGT  
TTTGTACCTATTTCCGATTTCATCATTAATATTTTTCAGAAATATCCCTCAATTATTC  
CCGGGTCGTGGGTAGCCAGTGAAAATTTCGAAAAAATAATTGAGGGGAGTTCTTTCTGTCT  
CGAAATCAAATAATATTCATTATTTCAAGCGGTTCTTTTGGGCATTATCGAAAGAACA  
AATGAAGATAGAATTGGTTGCAATTTGACCAACTGAGATATCTGGGAAAAGTATTTGATT  
ATTTCTTCATTCCGAACGGGCCCTTATCTATTTCTATATTCTTTCTAGATCCA  
AGGACTAAACAATTCAAAAAAAAAGGAATAGATCCATAGGTTCCATACCTTGTATAGA  
ACTCATGCTTCATAGAAATATCGGATCAGATAGAGTCGGCGAATGAAGCGGGTTCATTAA  
CAATTCACAGATGAAAAGTGTCAAAAAGAAAGCATTGACTCCCTCCCGTATCTTGCAT  
CTATAGTCTTTTTGCCCTGGTGGATCTCTCTCATTTAATAAAAGTCTGGAACCTTGGG  
TTACTAATTGGTGGAAATACCGGACAATCCGAACTTTTTTGAATGATATTCAAGAAAAGA  
ACGTTCTAGAAAGATTTCGTAGAAATTAGAACAATACTTTCCTGTTGGATGAAATGATAAAG  
AGTACCCGGAGACACAGATACAAAAGCTTCGTATAGGAATCCACAAAGAGACGATGCAAT  
TGGTCAAAATGCACAACGAAGATCATATCCATATCATTTTGGATTTCTCGACAAATATAA  
TCTGTTTTGCTATTCTAAGTGGTTATTCTATTCTGGGTAATGAAGAACTTGTCATTCTGA  
ATTCTTGGGTTTCAGGAATTCCTCTATAACTTAAGCGACACAATAAAGGCTTTTTCTATTC  
TTTTATTAACTGATTTATGTATCGGATTCCACTCACCCCGGGGGTGGGAACATAATGATTG  
GTTCCGTCTACAAAGATTTTGGATTGCTCATAACGATCAAAATATATCTGGTCTTGTTT  
CCACTTTTCCAGTCATTCTAGATACAATTTTGAAATATTGATCTTCCATTATTTAAATC  
GTGTATCTCCTTCACTTGTAGTGATTTATCATTC AATGAATGAATGAAGAATCATTGGA  
TCTGCTGATATCAATCAATCATGATGCTACTTCGTACATAAACTGTTTTGAAGCT  
TACTCACTCTTTTACTTCTTACC CGCCAGGGGTTCTACTATACCTCAGTACAATAT  
TCCAGTACAATGGCAGAATCATGGATAGGGAACATGCTAGCTACCTACCTAATTTATTG  
TAGAAATTTCCGGATCAATTATTTGGACCATGCAAAATAGAAATACCTTTTCTGGGTAA  
AGAAAGAGATGACTCGATTCAATTCCGTATTGATCATGATATATGTAATAACTCGGACAT  
CTATTTCAAATGCATATCCTATTTTTTGCGCAGCAGGGTTATGAAAATCCACGAGAAGCAA  
CCGGTCGTATTGTATGTGCCAATTGCCATTTAGCTAATAAGCCCGTGGATATTGAGGTTT  
CACAAGCTGTGCTTCTGTAATACTGTAATTTGAAGCAGTTGTTAGAATCCCTTATGATATGC  
AAATGAACAAGTTCTTGCTAATGGTAAAAAGGGGCTTTGAATGTGGGGGCTGTCCTTA  
TTTTACCCGAGGATTCGAATTAGTCCCCCGATCGTATTTCTCCGAGCTGAAAGAAA

AGATGGGCAATCTGTCTTTTCAGAGCTATCGCCCCACTAAAAGAAATATTCTTGTAGTGG  
GTCTGTCTCTGGTCAGAAATATAGTGAAATCGTCTTTCCCATTTCTTCTCCGGACCCCTT  
CTACTAAGAAAGACGTTCACTTCTTAAATATCCCATATACGTAGGCGGGAACAGGGGAA  
GGGGTCAGATTTTATCCCCGACGGGAGCAAAAGTAACAATACAGTCTATAATGCTACAGCAG  
CAGGTATAGTAAGCAGAAATAGTACGTAAAGAAAAAGGGGATATGAAATAAGCATAGCCG  
ATGCATCGGATGGACACCAAGTGGTTGATATTATACCTCCAGGACCAGAACTTCTTGT  
CAGAGGGTGAATCCATCAAGCTTGATCAGCCATTAACGAGTAATCCCAATGTGGGTGGAT  
TTGGTCAGGGAGATGCAGAAATAGTACTTCAAGATCCATTACGTGTCCAAGGTTTGTGT  
TCTTCTTGGCATCTGTTATCCTAGCACAAATCTTTTGGTTCTCAAAAAGAAACAGTTG  
AGAAGGTTCAATTGTCCGAAATGAATTTCTAGATCCACGGATTCATCAAGTTGATAAAAA  
GGGCCGAATTATTGTTGATCAATGCAATTATGTATGATCCAAAAAATATGGAAAGCCCC  
TTGTCTTCTCTTTTATCCTGCTTTTCTGCGAGATGCCGGGAATTGCTTGTATCCCAT  
CCCAGTAATAGTATGTATATTGCGAAGAAGACTACTTGACCCCCCTTTTCTTTT  
CAATCCAAATTGGAGCGGTGTGACGCTTCTTATGCCAGATTGTAATGCCATGGAATGC  
ATCAATAGTTTTTCTATCTAATAGAATCGAATTTCTAATAGACAATAGGCGGCATAACAT  
TAAGTAGGAAGAGAAATACGCGGCAAGGGATAAATGAAAGAATGATTCTGGGAGGGATTAC  
TTGTCTTCTCAATTTTCGACACAAGAAAAGGAATTTTCCGCCCTTTTCTTGTGTCGAAAT  
AATAATGATTCTTGATCTGTTCGTCAAAGATTACTGTTTTCTTTCCAGGTCATCGGA  
ACCTCTTCTTTAGATTTCATAAGAAGTGGCGGACAAACAAAAAGGGGATGGCTTAGTA  
AACAAATAGAACCTTCTCAACGAACTTATAAAATTTCAAGTAAAAAATAAATTTT  
AAGATGAGATAATAAATAAGGATTTGCATATGTGCAAAATCCAAGATTTTCCCCTTTCA  
ACCGGAACATTAAGAGTCTTTTTTACTTGATGAAATTTGTTTTTATAATTTTATAGA  
ATAGAGTAGAGTAAGGTTCAATTAAATTAGTATAGAAATGGTTGTCAGGATGCTCATCT  
GTAGAAATCCTGTGTCATCCAAAAATAAATGATTCTTCTTCTTCTTGTTCGGGAAG  
GGCCCTCATACTATGGCGGAACAGATACTATGAATCAATCAAGGGATCCATTTTCAA  
AAACATCATCAGAAACAAGCATCCTTTTATCATTTCTATGAATCTAATATTATGATTAT  
GTTGACTGGATGAATTTCCAACTTTTTTATGTTATGGAATAGATCAAACAAAACCTTAC  
CCGAAGAGTAAGAACTCAATAGGACCTTACCCCTCTTGTCTGATTGCGGGGGTAAGGTC  
CTATTGAGTTCTTACTTTTTCTATGTCTACAATCCGGCTCATCCGATTACTATAGGGATGA  
TCCCAATCCGGAATATGAGCCGTAAAAGAAAATACCTATTGAACCGATCACAGGAATACC  
AGTTACAGTACCTATAAGCCAAAGAGGAATCCTTCCAGTAGTATCGGCCATTTACCCACT  
TCCCTCCACATTTTCATCAAGTGGTCTGTCTAGAGACATAAACAGTCATGGATAATTATGA  
GGATGATATCCTTCCGAATGGGATAAGAGAATCCTACTCTTTTCTTTATTTTCTCA  
ATTGAAGAAATAATTGGAAAATAAACAGCAAGTACAAAAATGAGTAATAACCCCAAGTA  
GAGACTGGTACGATTCAATTCAACATTTTGTTCGTTCCGGTTTGATTGTGTCGTAGCTCT  
ATAATTCGGATTAGGTTTATCGTTGGATGAAGTGCATTGCTGATATTGACCCAAAAAAG  
AAACAGTAGGTACAGTCTGATCCGTGAACAGCCAACCATCGCACTGTAAAAATGGATAGG  
TTCGATCTATGGTCATTGAGGCCTCTAAAAGGATCTACTAAATTCATCGAGTTGTGCCA  
AAGGATCAAAACGACCAGTTATTAATGGAATTCCTTGCCGGCTCTCTGTGAAATATTCGT  
TTGGCCGAGGGCTTCCAAACACATCGTAAGCTAAACCTGTGCTGACGAATAACCAACCCG  
CAATGAATAGGGAAGGTATAGTAATACTATGAATGACCCAGTATCGAATCTGGTAATAA  
TATCAGCAAAAGAACGTTCTCCCGTGCTTCCAGACATGCTGAGCTCCACATATTCTTGTA  
CAGTCAAAACAGAGGATCGATTCCGTGAAAGATGGGATCAGTAAATGGAAAACACTGATA  
TTTCATCCTTGTGAGATCGTCAATAGTGTACCGAAGGTGATTTAGAGTATACCGAATCA  
GTATAGCTATCCTTCTCTGACACAGCAATGCATTTTCAATCAGTATCGAAAGAAATGG  
AATTCCTTTCTTCTTCTTGTTCCTTGTCTATGCAAAACCGGTGTCATTCAATAGAAA  
ATTCTTAAATACCTGTAATATAGGGTTTCTTTACTGGCTTCGGAATAGAACTGAAGAT  
CTTGGTAAAGTATGAGTGTGACGGGTTCTAATAATTCATGATTATTATTTCCACAATTC  
AATTAGATGCAAAATTTAGAAACCCCTTTTCATGGTTGTGCAAAAGGTATTTTTTTTTC  
TAATCCTTTCATTAAAGTAATTGGTTGGTCTGACAGTAGTAGACAGTAGTAGGTAGTAG  
TAGATGGAAAAACAGAACAAACAGTAGTTGGAACAATTATCAATATTTGTGATGCAACC  
ATTGCTGCATTAGACCCAAAGGTTCTTCTTAACCCAGCTACAAGGATGGGACTGAACTT  
TATGATATGGAAAGACAGAGTGCAGAAACCTAAACTAAAAGGATAATAGCAATTGCTAGTT  
TTAGAATGAAGTTGGGCTCGAAATAAAGGTTTTATTCTTCGAGAAATCATGGGATACTT  
TTCATTTTTCTTCTCGTTGCAAAATATTATGTGCAATTAACCAACCTACTACTGAATACAA  
TTAAGTTAAAAAGTCAAGTAAAGCCGTTATCCGGCTGTTGTTCAAAATGGATTAGAT  
AAATTGAAAAAGAAACGAAATGATCAAAAAATGGAATTTTCAAATCCAATCTTTATAT  
TCTGATAGTTACTCAAGAGAAATTTTCAATTTGAATTGAATGAAGTTACAAGACACAGTT  
CTTATTATTAGTACTTTACTCACGGGTTGCTCACTGAATCTGTTGATTGCGAATCATGGG  
ATCTGTAGATGTTACAGGCGACGAATCCATCTTTTTTTCTACCCCTCTTACTCTCTCTT  
TGTTAGTGCCGCTATATATGGATGATGAATCAGAGCTTTCAATTGGAACGATTCTGTC  
AATTGGTATTTTTCTTGTGTCATTGTATCTCGCAAAATGGAACCTTAGGTAAGTGCTTTA  
GAACCTATGTATGAAAAAGAGATATCTCATTAGCTCCTCATGACTACTATAACTAG  
TTATTTCCGGTTTTCTACTGGCTTCAACTATAACCCAGCTCTATTGATTAGTCTGAG  
CAAGATACGACTTATTTGAAATTAATTGAATGAACAATTCATAAAAAATGAATATTTCTGT  
GAGATCCCGGATTCTATAGTTCCTTCCCGCTTAATTGCCAATTTCTGGTTATTGAGA

TTTCATGGGCGATTTCGGATTAATATTTAGGGACAGATATTACCTCTCTTTTCTATTCTTT  
CAAAGAAATTGAAATGATTGAAGTTTTTCTATTGTGAATTGTGTTAGGTCTAATTTCCCAT  
TACTTTGGCCGGATTATTCGTAACATGTCATATTTACAATACAGACGCGGCGATCAGTTGGA  
CCTTTAATTGAGTAACATCTCTTTTTTTTAAATGACCTCCTCCTTAATCTCCAGGAGGTC  
AAATTCAGGTTGCAGTTCAAGTTAGTGAAGTTATTTTATTGTGATTCAACATTAAGAA  
CAGAATCACGCTCTGTAGGATTTGAACCTACGACATCGGGTTTTGGAGACCCACGTTCTA  
CCGAACCTGAACAAAGAGCGCTTTATTATGATGGGAGATACGGATGTCAAGAAAAGGATTC  
TTTTTGTACCCCCAATACATCTTGTATGTATAGTATCACAAAATGGTAGATTGTGTCCAA  
TTTTAATCGATCTCAATTGACCCCTCGTTACTGTCCATAGGAGAAGTAATAGGTAGGGAT  
GACAGGATTTGAACCCGTGACATTTTTGTACCCAAAACAAACGCGCTACCAAGCTGCGCTA  
CATCCCTTTTCATGATTGTTGTACAGTGCCATTGTAGGGAATCCATGTTTTGTTTTCCACA  
TCATAATTTCCCTCTATCTAAATAGAATTTCTTTTGCCATTTCTCTTTTTTGGTTTTTTGG  
TTTCATTTCTCAATAAAGAATTATATACATACCTAACGTATAAACGTATAAAGGAATGAAT  
ATTTATCAGTAGTGCTCAGGAAGGAGGTTTCATCTTTTTCTGTTTTAGGGACAGGTAGAT  
TTCATCTACCGGATCGTTGTATATATCCATTTTGGTTAGAGATTCCCCGTACAAATGATC  
TTAACTACATATGCATCTGATCATATATGTATTACAATATACAATAAAGTCAATAAAGT  
TAACTTTTAAAGAAGGAGGATTTTCAATGCGAGATATAAAAACATATCTCTCCACGGCACC  
TGTGCTAACTACTCTATGGTTCGGGTCTTTGGCGGGTCTATTGATAGAGATCAATCGTTT  
ATCCCAGATGCGTTGACATTTCCCTTTTTTTCATTCTAGTTATTGACATGGGAAGGGAT  
CAAGAAGATTAGAGATACAATAAATTCTCTGTGACTAACCCCCCCCCCTTTTTCAGTTCTT  
TAGGATAGGAAAGAAAGAGTAAAGAATAAAAGTGGATTGAATCTCATCGAAACTCGGGTT  
CGGGTTAATATAGGGAGAACAGAAATGGAAATGTGGGTCGAGGGCAGGCTGTTCAAGATC  
ATACAAGATACTAAATGAATACTGGGATTGGGAATAATTGATAGTTAGAAATATTTGTA  
TTACTTAATAATTTGATTACTCTATTGATTGCAACGAAATCTTTCATAATTGAATTGAT  
TTCGAGTTAGCAACTTCTCGTCTATTTATTTTTTCATTCCCTTTCTTCTCGCTTCGGTTTCG  
AATCGAAAATAGAGAATTGAGTGAATTCAAAATCCAAAGGAGGTTTCATGGCTAAGGGTA  
AAGATGTCAGAGTAGTAGTTATTTTGGAAATGTACCAGTTGTGTCCGAAATGGTTTGAATA  
AAGAATCGCGGGGCATTTCCAGATATATTAATCAAAAGAATCGACACAATACACCTAGTC  
AATTGGACTTGAAAAAATTTCTGCCCTTATTGTTACAAACATACGATTTCATGGGGAGATAA  
AGAAATAAATCGAACGGAACGCGTGTGCCACTCTTCCAAGGAAGAGGAAGAAATTACATA  
TATATATATATAATATACAAATCCAGTCCATTTTTTGGTCGGATCCGAGATGAATGAA  
GAAATAGGATTTTAGAAATAAGAAATAAACCATGGATAAATCCAAGCGGCCCTTTCATAA  
ATCCAAGCGATCTTTTCATAGGCGTTTGCCCCCAATTGGATCGGGGGATCGAATTGATTA  
TAGAAACATGAGTTTAATTAATCAATTTATTAGTGAACAAGGAAAAATATTATCTAGACG  
AGTGAATAGATTAACCTTGAAACAACAACGATTAATTAATTAATTAATTAATTAATTAATTA  
TATTTTATCTTCGTTACCTTTTCTTAATAATGAGAAACAGTTTGAGAGAACCGGGTCGAT  
CCCTAGAACTACTGGTCCCTAGAACCGAGAAATAAATAAGCCTATTCTCTCAATCGAATCA  
AACTCTAATTCGAACCTCAGATTGAAGTTTGTTCGAAAAAGCCGAGAGATTGTGCGGCC  
GTAAATGTAATAAATAAAGAAATGAGGGAAGAAATAAATCTTTTTTTTTTTTATTGAAC  
GTGTTTCGTTTCCTACTACTTATCTTATCATACGAATTTCTACTATACCTCCCGGAG  
TTCATTCTCCGGGGAACCTCCGTTTAAAGTATTCCAGTGAATTCCTTCCAATCTCCTTATT  
TGATGATCGCATTTGGAATTCGTGTCAAGACAATTCCTATTGATATGGCTATTGTGTCAG  
GTATTTTACGATTAAGAAGCAACTGCCTCTTGTACAGATCAAGTATTAATCGACTATAAC  
TATGGGATCCCTATTCTCACGAGTTACTGCATTTATCCGAGTGATCCACAAACGACGAA  
AACTTCTCTTTCGCTGCTCTATCCCGATGAGTGGAACCAAAGCTCTCATTTTCTGTT  
GAGTAGTAGTTCGAGTAAGTCTTGAATGAGCCCCCTCGAAAGGTTGTGCAATAAACGAA  
TTTTTGTTCACGTCTCCGAGCTATATATCTTCGTCTAACTCTGGTCATTGAATCAAAAG  
AACTTTTGATGAATAACTAATTGATTCTTTTCTTTTCTCAGTCAATCTTTTCCCCCTCTCTG  
GTTTATTAATAACAAAACGGATTCTTCCGATGTATAAAATTAATAAATAAATAAATTCGAATGG  
CTTTTGCTACTATAACCTTCCCAACCACGATTTTTTTATTTCTCCAGGCATTTACCTC  
AAAAAAAAAAAAAAAAAGAAATGTACCGATATTAGGTATAAAATAAATCGTAAATGGACA  
AATAGTGGCTTCCATCGTTTCTATGGTTACTTCTTAAACGGCGAGGTCCTCTCTATACAC  
CGGAGCCCCCTTCTCATTTAATCAATGTTATTGGTAACCTGTACAGTTACGCTCTTTG  
GCTCTACCGATGAATTATCGAGTAATAGGTCTTTTTTCAATGGGATCTATCCATACAGTG  
ACGGCATTTAATTATGAAGGTTGAATAGGTAGCTGACCCTGTTAGTCCGTTCTTGCAAGA  
GTAGGAGCATAACTTTCTGCTTCTTAAATATCATTCCCCCGTTAATGGATAACCATTT  
GCTACCAATGGGAATTGCTTTTCATCTCAAATCGAGGTGATTGGATTTGCACCAATGGAA  
ACCATAAATTCATACAAATAGAGGTATACGAGAGATCTTTATTTTTTCGATAGTGAATGG  
AGTTCTTCCATTCTATTGATTGGTACGAGTCATTGATACTGTAAAAGTCGTCTCATTTGT  
TCTAGCTCATGATCTGAACGAGTCGCACATACACCCTAGTACATGTTCCCTCGACGCTGAG  
GACATCTCGAAGAGCGGGGGATTTCTGTACATTTCTGATTGGCTGTCTTGTGTTTCTAA  
TAAGTTGTTTAAATAGTTGGCATGCTGAATCATATACAGAATGGGCTGGTTTAGATCGATC  
CTAACCGGATGATTATGAATTACTTCTTTACCCAGGTAAGAAGATAAAAGATCAAATAAG  
GGTTCAATCAAATTATGATTTCGAAATGGAATCAAAGATTTATGCGAAATCCCCGGTATTT  
TCGATCGCTACAAGATCAACAATGCCATAATCTTGGGCTTCTGTTGCTGACATAAAAAACA  
TCCCTTTCCATGTCTTCGGATACAACCATAAAGATTGCCCGTCTTTGTACATAAAACC

CTTGTGAGGGTTTCGCGGAGTTTCAGTAGTTCTTCCGCTTCCAGGATAAAATTCTCCTGTG  
GGTGCCTCATAAAAAGAACTAGCAGGTTGATGGATCATAACCCCTGATGATATAACATAAT  
GAACGATTCCTCTATCTCGCATGATTGGGCGAAGGGAAGGGATAAAGAATAACAAGCAGG  
GAGAAAAAGATAGAATTGAACAAACCGTACAGGCATCTTTTGTGCATACGGCTCTGTAATG  
GAATTTTTTTTTCTCTTTTTTTCATCGAAGAAAGAGACAAGTCGAATCTATCAGACCCAGA  
TCGTTGAATGATCCATTTACCATCCTTCCTTTTCGGAGTAATCAAAAAATACTATGATGGT  
TCCGTTGCTTTATATATTATCTCGTCTGTGATTCAGCAATCCCAAAGTTTCTTTCTGAT  
CCGATCAAATAAAAAAAGTAAAAAATGATCTTTTTTTTTTTTTTTATTTTCACACTCTT  
TCATAACATAAAATATTGGAAAGAGACTTCTGATGTGGAAGCAAAAAGGTTTGTGACGCTG  
AAATGGACCCCGATACATAAGATCAAGTCGGAATAACCTTTCTTTTCATACTACTATCTC  
GATACATAATCTCATATTATGAAAAAATAAATAGTTTGCTCATATCGAACTTGAAATG  
CCATGCTATTATTACTTAAATATTATTATTATTTTATTTCATATTCCATATGACGAAGGCAT  
AGTCTTTTTTTCTCTCAAATAAAAAAATCATTTGGCGCCAAGCGTGAGGGAATGCTAGAC  
GTTTGGTAATTTCTCCTCCAACCAGGATGAAAGATCCCATTGAAGCGGCTAATCCCATGC  
ATATTGTATGCATCTCGTGGCACAATTGCATAGTATCATAAATAGCTATTCCTGGGA  
TTACCCATCCGCCGGGAGAATTTATAAACAAATACAGATCCCTGGTATCATCCTCTATAC  
TGAGATATACCATGAGACCAACAAGTTGATTGAGATCTCGCTATCAACTTCTTGGCCTA  
AAAAAAGTAATCTTTCTCGATGAAGTCGGTTGATTAGGACAAAATTCTATTCTTAGGAA  
CCGTACACGCACCTTTGGGTGCATACGGTTCAAAAAATCAAAATTGAGAAAAA  
AGAAATTTGTCGATTCAGCCCTATTCTTTTTTCGTAGCGGGCTTTTCTTCCATTTTTT  
AAGAAACATGAGTTTGAAGTCTCCCTATAAAATCAAAAAAGAATTCAGTGAACCTAT  
CGAGCTAACCCCTCATTTGATGTATTGTTTCATCGAGATCTAAATCACGATGTAATTTTCT  
TGTTCCCGAATGGGCCTCTTCCACTCTTTAGGTTTATGCTCTACTCCGGGTAAAGATCT  
GCCCGAATTCGATTTGCACATATAGGACAAATGATCCAGTACCACCTCTTTTTTGCTATG  
ACTTCTTTTTTTTTTCAATTTGTTTCATTTTCATGCCTTCCACAAAATATTCGATGT  
ATTCATCATATTATTCCATTAATTGGCAATTTGGGATCACTCATATGGTATAAAGGAATC  
ATTTCTGATAGGGTGGTAATCATACATGGATTACCTTGGTATTTTCTGAACGGAGCCTGT  
ATACTTCATTTTATTGGTCCAAGCCAACCATAAATTCTTTAATTGAGAATATTGATCCT  
CCAACCAAATAAATTGATCTAATTGCACCTTCACGCTTCGAATTATTGATGGTTCAATCAA  
TCTTTCTTGGCGGAAACAGAGGATATCTCGATCGGGGGAGAGAACGGGGAAATCCCATAT  
GACCAATATGCTGACAAAGTCACACTATACGTCAACCAAACTGCATCTCTCTCCAG  
GACTCCGAAAAGGTACTTTTGGAACACCAATGGGCATTAAATGAAAGAAAAATGAAGTAT  
TCTATTTCACTTTGATGTGGAACGTAACAAACAATGGTTTATGTCTTCATAATATTGT  
CGTTTATCGTATTTTATCGATAGATTGGAAGATTCATAGAGGAAGACGGAATAAAGGAAA  
ATTCTTACGAACGGATCGTTTGAATGAGAAACAAGTATCTATACATTCGCTCACAAAAA  
TAGGATTAATCCCCCATTTGCGTATTGGTACTTATTGGGTATAGAATAGATCGCTTCTC  
TTTGTTCCTACGAACAGAAATTGTTCAATTATTACTAACGGAACAGAAATAAATATTAACCC  
TTGTTTCGAGATAATCCAATGAAAAGGTGAGGTCCATAGCATAGTTATTTCCAATGTGAT  
AAAGTTACATAGTATCTATTTTATCTTTGAGAAAGGGGTATTTCCATGGGTTTGCCTTGG  
TATCGTGTTCATACCGTCGTATTGAATGATCCCGGTGCGCTGCTTTCTGTCCATATAATG  
CATACAGCTCTAGTTTCCGGTTGGGCCGGTTCGATGGCTCTATACGAATTAGCAGTTTTT  
GATCCTTCTGACCCCGTCTTGATCCCATGTGGAGACAGGGTATGTTGCTTATACCCCTC  
ATGACTCGTTTAGGAATAAACAATTCTATGGGGCGGTGGAGTATTACAGGAGGAACATA  
ACGAATCCGGGTATTTGGAGTTACGAAGGTGTGGCCGGGGCACATATTGTGTTTTCTGGC  
TTGTGCTTCTTAGCAGTATCTGGCATTGGGTGATTGGGACCTAGAAATATCTGTGAT  
GAACGTACGGGAAACCCCTCCTTGGATTGCCCCAAGATTTTGGAAATTCATTTATTTCTC  
TCAGGGGTGGCTTGGTTGGGTTTGGCGCATTCATGTAACAGGCTTGATGGTCCCTGGA  
ATATGGGTATCCGATCCTTATGGCCTAACCGGAAAAGTACAATCTGTAAATCCAGCGTGG  
GGTGCGGAAGTTTTGATCCCTTTGTTCCGGGAGGAATAGCCTCTCATCATATTGCAGCA  
GGTACATTGGGTATATTAGCAGGTCTATTCATCTTAGTGTCCGCCACCCCAACGTCTA  
TACAAAGGATTACGTATGGGCAATATTGAAACTGTCTTTCCAGTAGTATCGCTGCTGTC  
TTTTTTCAGCTTTCTGTTGTTGCTGGAACATATGTGGTATGGTTCAGCAACTACCCGATC  
GAATTATTTGGTCCCACTCGTTATCAGTGGGATCAGGGATACTTCCAGCAAGAAATATAT  
CGAAGAGTTGGCGCCAGTCTAGCCGAAAATCTGAGTTTATCGGAAGCTTGGTCTAAAATT  
CCCGAAAAATTAGCTTTTTATGATTACATCGGTAATAATCCGGCGAAAGGTGGATTATTC  
CGGCGAGGCTCAATGGACAACGGGGATGGGATAGCTGTTGGATGGTTAGGACACCCCTATC  
TTTAGAGATAAAGAAGGGCATGAACTTTTGTACGCCGTATGCCTACTTTTTTTGAAACA  
TTTCCAGTAGTTTTTGGTGGACGGAGACGGAATTGTGAGAGCCGATGTCCTTTTAGAAGG  
GCAGAATCGAAGTATAGTGTGGAACAAGTGGGTGTAACGTGTTGAGTTCTATGGTGGCGAA  
CTCAATGGAGTCAGCTATAGCGATCCTGCTACTGTGAAAAAATATGCTAGACGTGCCCAA  
TTGGGTGAAATTTTTGAATTAGATCGTGCTACTTTGAAATCCGATGGTGTGTTTTTCGGAGC  
AGTCCAAGGGGTGGTTCACTTTTGGACATGCTACGTTTGCTTTGCTCTTCTTTTCGGA  
CACATTTGGCATGGCGCTCGAACCTTGTTCAGAGATGTTTTGCTGGGATTGACCCAGAT  
TTGGATGCTCAAGTGGAAATTTGGAACATTCAAAAACTTGAGATCCAACACTACAAGGAGA  
CAGGTAGTCTGATACAACATTGCTCCGTATCTTTCGCCTCTATATTTGATTTTTTTGAT  
TTGACATAAGGTACCGTAGAAATATTGATTTGAATCATCGCCTTCTTTGCTCTTGTCTCT

TTCTTTATCTGGGAAATAATCCTAAATGAACAGGTGTGGAAGCTATAATTGTAAACAACG  
ATCGAATCTATGGAAGCATTGGTTTATACATTCTCTAGTCTCGACTTTAGGGATAATC  
TTTTTCGCTATATTTTTTCGAGACCCGCCTAAGGTCCCGACTAAAAAGACGAAATGATTT  
TTCATTATCTTAATTGAAGTAATGAGTCCCCATATGGGGGACTCATTAATTCAATTAGT  
CTCCGTGTTCTCGAATGGATCTCTTAGTTGTTGAGAGGGTTGCCCAAAGCGGTATATA  
AGGCGTACCCTGTAAAGCTTACAAGTGAACCAGATATGGAGATGGCGACTAAGGTTGCTG  
TTCCATTATTAGAGAATTTCAAGACCACGATGGATCTATGCTACGATAAGATCGTTTAT  
TTACAACGGAATAGTATACAAAGTCAACAGATCTCAACCAATGCAATAGTATTTATGGCT  
ACACAAACCGTTGAGGGTAGTGCTAGATCTGGGCCAAGACGAACTATTACAGGGGATTTA  
TTGAAACCATTGAATTCAGAATATGGTAAAGTGCTCCTGGATGGGGAACCAACCCCATTT  
ATGGGTGTCGCAATGGCTCTATTTGCGATATTCCTATCTATTATTTTAGAGATTTATAAT  
TCTTCCGTTTTACTGGATGGAATTTCAATGAATTAGGTCCATAAGAACCAGAGCCCTAG  
CTTTTCAATCAAAAATGAATCACTTAGGACTCAGATTTATAGTCCATTCTGGTAGTTTGA  
CCGTGGAATTCGGTTGTTTCCGGTATTTCCGGAATATGAGTGTGCGACTTGTATAATTGA  
TCCATTATGATAGTACAGAGAATGGGTCTGTCTATCTCGACAGAGATGGTTCTGCCTCGTCG  
GATATTCACTAGTATCTGGAGCACGGAATATATGGAATAGATCAAGAAATATTTGAAC  
TATGATTCATACCTACTATTTCAGACCTCGTGACTGGACTTCAAAAAATTTTCAAACAAAG  
AGGTATTTGATAAATTGACGATTTTTCTTCTTTAGAAATCATGCTTATTTTGACCGAAG  
GACAAATCTTCTCTGGATTTTTAGTCATTACATCTATGAATAAGTGATGATCAAAATAGT  
TCTTACTCATAGAACCCCTTGGTCTTAGTTTTTGGGTTTTATTGAATCATCGTGGTTCTAG  
TATGAATCTGAGGTTTCAATCGATTCTAGGGTCTCAACAAGAGAATTCCTATCAAAAA  
AAAATAGTAAACAATAGTCAATCTGCATTACGCACAAACAAAAACAACAATCAAATAAC  
AAATAAATAGGGGAATAGAAGATTCAAGAGGCCTGTAACGATCAACATAAGACAGATGA  
GCTAACTTGATATTTTGGCATTCTCATCACAAACAAAGAAGAGATTTCGGATTTTGGTTCC  
TTCGTATCTTCAGAGACGATTGAATCAAGTGGATAAATAAGAAATTTCAAATTTCTATT  
ACATATCCATTGTAATCAGTATTTGGGTGTTTCTGCTTGAGCCGTACGAGATGAAATCT  
CATATACGGTTCTCAGAGGGGGAGTCCCCTTGGTTTACCTATCTCAATAAAGTATATGAT  
TGGTTCGAGGAGCGTCTCGAGATTTCAGGCGATTGCAGATGATATAACTAGTAAATATGTT  
CCTCCTCATGTCAATATATTTTATTGTCTAGGAGGGATCACACTTACTTGTTTTTTAGTA  
CAAGTAGCTACGGGTTTTTGCTATGACTTTTTTACTATCGTCCGACCGTTACGGAGGCTTTT  
GCCTCTGTTCATAACATAAATGACTGAAGCCAACCTTGGTTGGTTAATCCGATCAGTTTAT  
CGATGGTCAGCAAGTATGATGGTCTAATGATGATCCTACACGTATTTTCGTGTGTATCTC  
ACGGGCGGATTTAAAAACCTCGCGAATTGACTTGGGTACGGGTGTGGTTCTGGCTGTA  
TTGACTGCATCGTTTGGTGTAACGTGTTATTCCTTACCCCGGACCAATCGGTTATTGG  
GCAGTAAAAATCGTGACAGGCGTACCTGAAGCTATTTCCCGTAATAGGATCACCTTTAGTA  
GAGTTATTGCGTGAAGTGTAGTGTGGTCAATCTACTTTGACCCGTTTTTATAGTTTA  
CACACTTTTGATTAATGACTCTTCTTACTGCCGATTTTATGTTAATGCATTTTCCAATGATA  
CGTAAGCAAGGTATTTTCAAGTCTTTTATAGAGAAGACAGATCATAGATATTTGTAATCGA  
TCATATATAAATTCGGGGAGGAACAATAGTGTTTTATTGCTACAAATATGGATTATTGAA  
AAGAATAAGACATCTTTTTTGATATTTCTCTTCAACTAACTACGAAGTATTGTATTCTTT  
ATTTGATACGAATAGTTGAAGTACATTCTCCGAAGAGAAGATGGATTATGGGAGTGTGTG  
ACTTGAACATTTGATTTGGGCGGTGCAGATATATGATTTTATCCGCCACATTGGAATTCAC  
AACCAATGTGTCTCTGTTCACACCACGCGTAGGTCCCCCTACAGAGGATAGGCTGGTT  
CGCTTTAGGAGAACTTTTTCTATGATCAGACCAATCATGTTATGTTGTGCATGAACGGG  
CTCCGTAAAGATCCAATAGAATAAAATAAAATGAAGTAATGTGGCATGATCCAGATTATGT  
TTTATCTATTTACTTAAAGTATGGAAATGCATTTCATTTCTCTGCATCGATCCCAATCTA  
TGATACTATCGGAGTGAACAAGGGATCTAAGGAAGAACATAGGCTAGACTTTATTAGTA  
ACAAGGAAATCCTTTGTATTAAGAAGACTCGAGATATTGTGGGGATAAAACATAATCACA  
AAGCATGAGACCATCAAAAAGCATTGATCATGATCAAATTTGGAAGCCTACTTGGGTA  
TTGAGCATTTACTTGTAAAGAACTGAATTCCTTGCAATGGGTAGTTGCAACCCCGTAAAT  
TGAATCCGGTAAATCTTTTCTTACATAGAGTCATATATGTGTGGATGATATATCTATTTT  
ATATGGACCCGTTTTATTCTTTTGATTCTTGCTCGAGCCGATGATAAAAAATTATCATG  
TCCGGTTCTTCGGGGGATGGATCTATAAGAAGAATTCACCTATCCCAATAACAAAGAA  
ACCTGACTTGAATGATCCTGTATTAAGAGCTAAATTGGCTAAAGGGATGGGGCATAATTA  
TTACGGAGAACC CGCATGGCCCAATGATCTTTTATATATTTTCCAGTAGTCATTCTAGG  
CACTATTGCGTGTAACGTAGGTCTAGCGGTTCTAGAACCGTCAATGATTTGGTGAACACGC  
GGATCCATTTGCAACTCCTTTGGAAATATTACCCGAATGGTACTTCTTTCCCGTATTTCA  
AATCCTCCGTACAGTACCCAATAAGTTATTGGGTGTTCTCTTAATGGTTTTAGTACCAAC  
GGGATTATTGACAGTACCGTTTTTTGGAGAATGTTAATAAATTCAAAAATCCATTTCTGTCG  
TCCAGTAGCTACAACAGTTTTTTTGATCGGTACCGCGGCAGCCCTTTGGTTAGGTATTGG  
GGCAACATTACCTATTGATAAATCTCTAACTTAGGCCTTTTTTAAGTTGATTTAACCGT  
GAAATACTACGCGTATGTATCTAGGGAATAGTCACTTCTAAAGTGAATCTCCCTAGATA  
CATCTCTTAAATTCATTATCAATCTCATCTGGATATAGAGATGATACTAAGGATTCAA  
AGCCATTTTCTTCTTTCTTTCTTTTCAAAAAAGATGAAATAATACCAATGGATTTAAAC  
TTATTCTTAGGTAATAAATGCAAAATGCTTCTGTAGAATGTCCAATATCTGTTTTACA  
TCTTCTATGCGAAGATGTTCAATCTCATAAGATCTTCTTGACTGTTATTCAAAGGTCC

AATAATGTATGTATATTGGACCTTTTGAGACAATTATAGGTCCTGGAGGGCAATTCTGAT  
TGGTCAATAAAAAATACATTTTCAGTGCAATTCCTTTTTTGTCTTTTCCCTATATATAGCCAAT  
CTATCATGAAAAGTAAAAACGATACAGTAAACCTGTTTTGATTGTCTTCTAAATAAAAA  
TGAATGTCTCTTCTCCCGCATGTAGAAAAGGAATAAATAAGTCAATCAAAGTACGGGAA  
GCTTCGCGAAGTGCTTCTTTAGGAGTTAAACTTCCATTCTCGTCCATATTTCAAGAAAAAGT  
ATCTCTTGTCTTCTCATTCTCACTCCCATAAGAATGAATACTATGATTTCGATTTCGAACA  
GGCATGGATACAGCATCTATAGGATAAATTCCATCTTGATAGTTATTGGGGGATTTTATA  
CGATATCCGCGATCCCTCTCGATTTTGAATTCAATACACAAATGAATTGGCTCCGTCCAGA  
TTAGCTATATGCTGTGTAGTATCGACTAGTTCCACAGAAGGCGGTGAGATGATATCTTGA  
GCAGTTACGTATTTAGGACCCCTGACGCAAAATGGATGCGTCACGAGTCCATACAGATTA  
CTTCTCAATACAATTTCTTTCAAATTCATTAATTTTCATGTACTGATTCTTCAATACCA  
ACTATCGTAGAATATTTCATGTGATACCTTCTCAGATTTTGCACGTGTGATACATGTTCCC  
TCTATTTCTCCGAGTAAAGCCTTTTCGCATCGCGATACCTATCGTATCTGCTTGACCTTTC  
ATAAGCGGGGACAGAACGAAACGGCCATAATAAAGACGCTTACTGTCTGTTCTTGATTCA  
ACACACTTCCACTGTAGTGTTCGAGTGGATACTGCTACTTCTTCTCGAACCATACTAATA  
TTATTGTTTGATCAGATCATTGAATCATTTATTTCTATTGCAATCCATTCAATTTTTATT  
TCTACACACGTCTTTTTTTAGGAGGCCTACATCCATTATGTGGCATAGGGGTTACGTCAC  
GTACGAACTTAAATAGTATACCACTTCTACGAATGGCTCGTAAATGCTGCATCTCTCCGA  
GACCAGGGCCTTTTATCATGACTTCTGCTCGTTGCAGACCCGTATCCACTGCCTTACGAA  
TAGCATTTCCCTGCTGCTGCGTTTGAGCAGCAAAATGGTGCCTCTCTTGTGCCTCTGAATC  
CACAAGTACCAGCGGAGGACCAAGAAACCCCGACCTATTACATCTGTAACAGTCACAA  
TGGTATTGTTGAAACTCGCTTGAACATGAATAACTCCTTTTTGTATTCTACGTCCATTCT  
TACGTGAACCAATTCTTGGTATAGCTTTTGTATATTTATCATCTCATAAATATAGTTC  
AGAGATATACGGATATATCCATTTTCATGTCAAAACAGATCCTTTATTTGTACATCGGACC  
GTTTAGAAAAGTCCCTTGTAGAAAAGATTACCCCTGTCTCTGTTTATGTTTCGGATTGGAA  
CAAATTACTATAAATTCGTCCTCCCGCTACGGATCAGTCGACATTTTTACAAAATTTTACGA  
ATGGAAGCCCTTATTTTCATATTTGTTATTCCTTAATTCCAAATATACTCCTTGAAGAA  
AATAAGTCTCTTGAAATTTTGAACCTCGAATTGTATTTCCCATGAAAGGAATGTTTAAATT  
CAAATAAAAAGCCGCTTAATCATTCGACTCTTTGTTGCGAAGCTATAAATATACGTCC  
CCTAGTTGAATCATAACGACTTACTTCGATTTTGACTCTATCTCCTGGTAGTATCCGGAT  
AAAACCTCCGTGCGATCCCTCCCGGAAACATAACCTAGAATCAGATCTTCATTGTCTAAACG  
AACTCGGAACATACCATTGGGAAGTGATTAGTAATTAACCTTCGTGAATCAATTTTTTG  
TTCTTTTCATTCCAGGTAACCCCTTGAAGTATCAACTAATGGAGGAGGAGTAATAGTAGA  
CAATTCGTCTTTCTCTCTTTTTCCCAAATAGCAAGTACGGATCAAATTCGGATACCAAG  
AAGGATCACCAGATATAATACAAAATTTCTCCCCCAATTCTTTCTAGTCGAGCTTCTCGA  
TCTGTCAATTATACCTCGAGAAGTAGAAAAGATTACGACCCCATTCACCTAAAATCCTA  
GGAATTCGTTGATGGTTGGAATAGATTCTGTAGACCGGACGACTGATACGCTTTAAATA  
TTTCTATATGTTCCCTTTCCTATTTCTTCTATGTGCGAGGGTTGAAACCAAGAAATATTTG  
TTGTTTTCCCTAGTTTTCTTAACATTTTCAATAAACCCCTTCTGTAGAAAGTATTTTAAACA  
ATGTTTTCGGCGATATTAGTAGATGCTACTCGAACCCTTCCTTTTTTATCCATGTTAGCA  
TTTCTTATAGAAGTTATTATATCGGCAATAGTGTCCCTACCCATGACGAACTAAATTTAT  
GGTGCCCTTCCAGTTTCTGATATAATCAACATGTTCCTTTTTTTTCATTTTTTCTTAT  
TTATTTATGAATTATTAAGGTATATGCGTGAGACACAATCTACTAACGTAATCTATTTTC  
AGAGACCTGACTATACTCTATCAGGTCTCATCTACTAGTATTTATAAGACTTCAGGAGC  
TAATGAGACTATTTTAGTGAAATTCAACTGTCTCAATTCGCGCGCATCGCTCCAAAAC  
TCGAGTTCCCTTTTGGATTTCCTTCTTGATCAATGACAACCTGCTGCATTGTCTATCATATCG  
TATTATCATACCGTTGTGCGTTTGAGTTCTTTACATGTACGTACAATTACAGCTCTGAT  
CACTTCTGATCTTTCGAGAGGCATATTGGGCACTGCTTCTTTGATTACAGCAACAATAAC  
GTCACCAATATGAGCATATCGTTGATTACTAGTCTCTATGATTGCAATACACATCAATTC  
TCGAGCCCCGCTGTTGTCCGCTACATTCAAATGAGTCTGAGGTGAATCATATCATTTTTT  
TTTTTTTTTTGAATCTGCTCTTTCAATGCAAAGGCAAAGGAAAAAGAGAGAAATATTGT  
CTGCCCAGAAATCCAAAAATCTGCGATTGTATTTTTTCATCACAAATACCCCTTCACATACC  
TATCACGCGATAATGAATTGAGTTCGTATAGGCATTTTGCACGCAGCTATTGAAATAGCT  
GCTCTGGCTACAGTTTCTGATACTCCGCCCATTTCATAAAGTATTCGACCGGGTTTAAACG  
ACAGATACCCAATATTCCGGGAGATCCTTTCCCGGAACCCATACGTGTTTCGGTAGGCTCT  
ACTGTAACGGGTTTGTGCGGAATATACGTACCCATATTTTTCCACCACGCGGTGCATAT  
CGTGTCAATTGCTCGTCTGCTTCTTCTATTTGTCTAGATGTGATCCAAGCGGGTTCAAGT  
GCCGTAAGAGCGTATCTGCCGAAACAAATATGATTGCCTCGATAAGATATTCCTTTCATT  
CTTCCTCTATGTTGTTTACGGAATCTGGTCTTTTGGGGTTATAGTTGATGGTTGTTTCT  
CAATCCCATCTCTACTGCAGAACCGGACATGAGAGTTTCTTCTCATCCAGCTCCTCGCGA  
ATGAAACGATTCAATAAGATTACGTATATGATTTATGAATGAATAATACACTGAATCA  
TGGAATTTCTTGATATTTAATCTGTACACGGGAAGCCGTATAGTATATAGTATATACGG  
CTAGACGGATATTTCTATTTTATTTATATGGGATAATGCCTTTCTTTTGAAAATGAATCC  
TTGACCTTTACCGAATCTGTCAAAATACATAATCCAAATAGGTTTCGCGGGCGAATAT  
TGACTCTTTCCATATTGCTTCATTCTGAGGGTGAACCCATGACCTATCAGAAGAAATTA  
ATTGGTTCCTGGTTGATTCCGCCATCCACCCAATGAATCATTAGGATTCGTTTTCAATA

GAATCTTCCGCAGTCACAGGTTTCGTCGTTCCCATAGCTTTTCCATTAATGGCTAGGCCT  
GAACTATGCAATGGAGTCTCTAATTAATTCGTTCCCGAGCCAATCTCCTCAGTCTCTAT  
TGACTCGGGGCTCTTTATTATTTGTATTTTCTTATGAACCGTATTCATCTAATTATGGA  
CGAATCAGTATTGATGCTTTTATCAGCTGCCTTTTATGATATGATGTGATTGATAGACCA  
TACATATTGGAATCATATATCATGGAGATTCTCCTTCTCTCTTCTCTCGCCCTTCCAGT  
TACCCACATCCCTCTATTTTCTTTCCAACCTATAAATGGATTTTTCCTTTATGGAAGAAA  
AAAAGATTTCAGTTGCTACAACCTATATGATCGATACATCATATGGCGACTGCTTCCTTGG  
ATCTCGATAATACAAAGCAATGAGTTGGTTACTAGTTCTTATAGTTATTAGTTAGGGGCT  
GGTCTGTTTTTTGAATCCCACTTTAAATAAAAAACCAACGAGTCACACACTAAGCATAG  
CAGTTCCACCAAAAGGTCAATCGAATTTTATTCACCTTATAGAATTAGAATTGCTCAT  
TTTTCATTTTTTTTTTTTATTGAAGTAAAAGGAATAGTTTGTAGTTTTTGTCTATCAC  
TGAATAGAAATGGCAAGCAAGGAAGGGTCCATTATTGCTCGTCTACAAATATCCAAATTT  
TGATGCCCAATGCCCCATAGGCGAGTTCGAACGTATAGGAACAATGATCAATTTTAGCTC  
GAATGGTTTGGAGGGGAACCTTACCTTCTCTGATCCATTCGACACGTGCAATTTCTTTTC  
CGTCGATACGCCCTGCAATTTCCACTTGAATTCCTTTTGTGCTGCTGCTTGTTCAGTTAATT  
CAATAGCTTTTTTTCATTGCCCTTTCGAAAAGAAACCTATTCTTTAATTGTAGAGCTATAT  
ATTCTGCAAGAATATTAGGTTGTCCATAAGGTTTTGCAACTCTGTAAATAGCAATGTTAA  
GTCTCCGATTACAGAATGAAGCCCCCTTTGTACATTGATCTGCAATTCCTTCGATTCCCTC  
GTGTTTGGCCTTCTATTAACAAATTTGGGAATCCAATATAGATTATGACCTGGATCAAGT  
CCATTTTTTTTTTTGAATCTCTATATGTGCAATTCCAATTCCTTCGAACTTGAAGATACTC  
TTATATTTTTTTGTACATATATCTTGATCCAATCCCGTATTTTTTTCATCTTCTCGGAGAC  
CTATGTAATAACTTTTTGGTTGTGCGAACCAGGGAACGATGACTTTGGTTTTCGCCAA  
GGCGGAAACCAAGTGGATTTATTTTTTACCCTCTTTTTTCTCTCTCTCTCTCTCTCTC  
TCTATATATCTTCTATTATAGGATCTCTCCATACATTTTTTGTCTTCTAAAAATATATCC  
TGATCTGTTTTCTTTTAGAGCTATCCTTCAATACAATAATTATATGACAGGCGGGTCTT  
TCTATCGGATAACTACGCTCTCTAGCCCTGGGTTTTAACTTTTTTACGATAGTACCCCA  
TTGACTTCGGCTTTACTAATGACCGAATCAGCTTCGTTGAACTTTTTATTGTGACTAGCA  
TTTGCTGCTGCAGAATAAACAGTTTAAAAATGGGATAAAATGCTCGATAAGGCATGAGT  
TCCAGTAACATAAGTGTTTTTCTCATAGGAATGCCACGAATCTGATCAATGACTCTTCGT  
GCTTTGTGAGCAGACATACATATACGTTGAGCTAAAGCTTGACTTGTGACTCGAGCTC  
CTCTTCATCTTCTGCTTTTCAAGGCTTCTTCCACTTCTCCACTTTCGACATAAGATAA  
GGTTCGCCTCCCGCCAATGAACGATGAGCACCTATTTCACTTTATTTTTATTAACGGAGAG  
ATCTAGTATCGTTTCTCGCGTGTCCCTGGAAAGTAAGAGTAGGTGCAAATTCCTTAATT  
TTTGACCCACCATAACGATCCGTTATATAAATAGGTAATGCGCCTTTCCATTATGAATGG  
CAATTGTATTGCCGATCATTTGTGGGTATAATGGTAGATGCCCGGGACCAAGTTACTATTA  
TCTCTTTTTCTCTCTCATGTTAAGCTTCTTTATTTTTTCCAATAAATGATTAGCTACAA  
AAGGATTTTTTTTTTAGTGAACGTGTACGGCCTATTATTTTTCCCCCCCCCTTTTTTTTTT  
GAAAAGACGAGTAAAAACAATATTTATTTGATTTTGAATATTCCTATTTACGGCGACGA  
ATAATAAACTATTACTATATTTATTCCTTTTCTTCTTCCAAAGCGCAGGATAA  
CCCCAAGGGTGTGGGTTTTTTCTACCAATCGGGGGCCCTCCCTTACCACCCCCGTGG  
GGATGGTCTACAGGGTTCATAACTACCCCTCTTACTACAGGACGCCTACCTAGCCAACAT  
TTAGATCCGGCTCTACCCAAACTTTTTCTGGTTGCGCCCAACATTACCCACTTGTCCGACT  
GTTGCTGAGCAGTTTTTGGATATCAAACGGACCTCCCCAGATGGAAATCTTAATGTGACC  
GATTTACCCTCTTTTGAATCAGTTTCGCTACAGCACCTGCTGCTCTAGTTAATTGTCCA  
CCCTTTCCAAGTGTGATTCTATGTTATGTACGGCCGTGCCTAAGGGCATATGGGTTGAA  
GTAGATTTTTCTTTTGTATCAATAAAAAACCCCTTCCCAAACCGTACAAGCTTCTTCCAAA  
GCATACGGCTTTCCGGATGTATATATATATATTCTATGATGATATCTAGACAGATGGATTTT  
ATATGAATCGTGTGATGAAGTACCACATGAGTGGATATATAGGAATACAAATCTGCCAAA  
TCACTCATGTTATGATCTTATACATCCTAGGTCTCTCCGTTTCGTCATCTGGCTTATGTT  
CTTCATGTAGCATTCAGACCGAATGACTCTATGAAATACGTCGCTACTTCCACATATTA  
CGGGTAACGTAGGAGACATCTCTATTTTTCCCCGGGGGAATTTTGAATTAACACCCT  
TAGCTTTCAATTCACCTCTGACCATCAAATGAAATGTGAATAACCCATCCTCTCTCTTT  
GAAACAAGGGTTCGCTTCCGCTTCTGTCCGTGCTTCAACAATTTTGTCTTCTCCATATTA  
CCATATCTGGAGTGTCAATAGTTTTCTATGAGGAACCTACTGAATCAATCACTTGTGCTGCC  
GTTACTCTTCAGTTTTCTGTGAGGTCTATCCCGTAGAGGTACTCAAATTTGGATCAGTGA  
TCAATTTCTAGGTTTCGTCGTAACCTAATTGGTTACTTCCAATTACGTAAATCCATAGT  
TCAAACCGCACTCAAAGGTAGGGCATTTCCTATTGATATAGGAACCTCTGTACCGGAAAC  
AATGGTATCTCCAATTATAGCCCTCTGGGATGTAATAATATCTTTTCTCACCATCTCC  
ATAGTGTATGAGACAAATGTATGCATTTTCGATTAGGGTCATATCTATGGTTACGATCCT  
AGCAGATATGTCTTTTCTATCCGTCGAAAATCGATTTTACGGTATAGACGCTTATGGCC  
TCCTCCTCTATGCCCTGCGGTAAATGATCCCTGGAATTACGACCTTACCGCAGCGATG  
CTGTCCATAGATCAAATATTTTCGCGGATTGGATTTTCGCTTGAATGCTATGGATCCTTT  
CGGTATGCTCGGGGTAGAAGTTTTGTATAAATGTATCGCCGTGTTATTTAGTATTTTTTT  
TTTTTTTTTTTTTTTTTACTTAATTTCTTTCTCTCTATAGAGGTAAAAATAGAATAA  
CCCGGTTGAAGCGTAATGATCATACGCTCTGTAATGCATTGTATGTCCCATAAATGGGTCCC  
GTTCTTCTACCTTTCCCGGGAGTTGATGACTATTTATAGCTATTACTTTGACGCCAAAG

AAGAGTTCGACCCAATGCTTTATTTCTGTCCTAGTTGATCCTGATTGCGACTTTCTTCCCC  
ACGAGTTCAGATATCGATAAGAAATTCAGTTCTTACTCTTCATATGTTATGGTTGGTATG  
AATATACCATACCAATTCGTTATGTATGGATGATGAGATTCCATTGATACGGAGCCAGTG  
GAATTAGTCTTTATGAAATGTCCCGTTGGCCTGCATCCAGCAGGAATGAACCTACGAAT  
TCGCCAATTATGAGTTGGGTGCTTTAACCATTACGCCATGGATGCTTCACTGGGGTCATT  
GTACATCGCGAGTGACCCAAATTCATTCACCTAGATTCTTTTGGATTCTTTAGGAGGAA  
TCAATGAAATGAGAGGACATCAATTCAAATCCTGGATCTTCGAATTGAGAGAAATCAAGA  
ATTCTCAGATTTCTTGGATTTCATGGATCCAACCCGATTCCGGTGAAATCTTTCACCTTCCT  
TTTTTTTCCACCAAGAGCGCTTTATGAAACTTTTTGATTCCCGAATTTGGAGTGTCTTAA  
TTTCACGTGATTCACAGGGTTCAATTCGTCGACATTGCATGATCAAAGGTGTAGTACTGC  
TTGTAATCTGTAGTAGCGGTCTTATATACAATCGAAATAGGGTCGAAAGAAAAATATCT  
ATTTGATGGGGCTTCTTCTTAAACCTCTGCGTTCCATTGGACCCCCAATTATACATTGA  
AAGAATCCTTTTGGTCTTCCAATCTCAATAGGTTGATTGTTTCGCTCCTGTATCTTCCAA  
AAGGGAATAATCTATGAGAGTTGTTTCATGGATCCGAAAGAAAGTACTTGGGTCTTTC  
CAATACTAAAAAGTGATCATGTCTGAATCTAACTGGGGTTCGCAGCGATGGAGGAATG  
CGATCGTAAAAAGAGGAATTCAGCTGTAAGATATCGAATGAAATTCAGCTGGAATTG  
AGATCTCATTCAAAGAGAAAGATATCAAATATCTGGAGTTTTTTTTTGTATCCTATACGA  
ATGATCCGATCCGCAAGGACCATGATTGGAATTTATTTGACCGCTTCTCTCCGAGTAAGA  
AGCGAAACATAATCAACTGAAATTCGGGACAGCTATTGCAATTTTAGTGAAACATTTGA  
TTGTATCTCTCATGTCTGCTTTTTCGTGAAAAAGACCAATTGATGAGGGGGGTTCTTCA  
AACAAAGAGAGCTGAGGCGACTATTCAATCAAACGAGATTGAACATGTTTCCCATCTCC  
TCTCGAGAAACAAGGGGGGTATTTTTTAAAAATTCGCTCAATTTTCATATGTGGCAAT  
TCCGCCAAGATCTCTTCGTTATTTGGGGGAAGAATCGGCACAAATCGGATTTTTTGAGGA  
ACGTCTCGAGAGAGAATTTGATTGTTAGACAATGCGTGGTTGGTAAACAGGAATCGGG  
TTTTTAGCAAGGTACGGAATGTATCGTCAAATATTCAATATGATTCCATAAGATCCATTT  
TCTTTCAAGTAACGGATCTAGCCAATCGAAAGGATTTTCTGATCAATCCATAGATCCTT  
TCAATTCATTAGTAATGAGGGTTCGGAATATCACACATTGATCAATCAAACGGAGATTC  
AGCAACTAAAAAAGATCAATCTTTTAGATACTTCTTTCTTCAAACGGAACGAACAG  
AGATAAATCAGATCGATTCTCAAAATACCTTTCCGGATATTCCTCAATGGCTCGGCTAT  
TCCCGGAACGTGAGAAGCAGATGAATAATCATCTGCTTCCAGAAGAAATAGAAGAATTC  
TTGGGAATCTTACAAGATCAATTCGTTCTTTTTTCTCTGATAGATGGTCAGAACTTCATC  
TGGGTTGAATCCTACCGAGAGGTGCGACTATAGATCAGAAATGTTGAAGAAACAACAAG  
GTGTTTCTTTTGTCCCTTCGAGGCGATCGGAAATAAAGAAATAGTTGATATATTCAAGA  
TAATTACGATTTTACAAATACCTCCTCAGTTCATTGCGATTGCAGCAGATCCGGGATGGG  
ATATGGTTCGGAAGGATGAACCGGATATGGACAGTTCCAATAAGATTTCAATCTTGAACG  
AAAATGCATTTTTTGATTTATTTTCATCTATTCCATGATCGGAACAAGGGGGGATACAGGT  
TGCAACGAGATTTGAATTAGAGAGACATTTCAAGAAATGGCAGATCTATTCACTCTAT  
CAATAACCGAGCCGGGTTTAGCCTATCATAATAAGGAATTTGGCTTGCTATTGATTCCCT  
ACGGAATAATTTGAATGAGGTATTCAACTCCGGGGATGAATCGAAAAAGAAATCTTTAT  
TGGTCTACCTTCCATTTTTTATGATTTATTTTTATTTGTTCTATCTTCTATTTTTTATG  
ATTTATTTTTATTGGTTCTACTTTCTATTTTTATGATTTATTTTTATTTGGTTCTACTTT  
CTATTTTTTATGAAAGAGATGAATCCTTTTATCGAAAGATAAAAAAATCGGTCGGA  
TCTCCTGCGGGAATGATTGGAAGATCCAAAACCAAAATAGCGGTATTTGCTCACAACA  
ACATAATGGAGGCGATCCATCAATATAGATTGATACGAAATCAGATTCAAATCCAATATA  
GTACCTATGGGTACATAAGAAATGTATTGAATCGATTCTTTTAATGAATCGACCCGATT  
GCAACTTCGCATATGGAATTCAAAAGCATCCCATAGGAATTCAAAAGCACCAATAGGAA  
ATGATATTCTGAATCATCTAATATAATAATAGATAAGATCAACCAACATTTATCCAATT  
TGAAAAAGATTAAAGAAAGTGGTTCGATCCTCTGATTTCTCGAACCAGAGATCCACGA  
ATCTGGATCCTAATGTATATAGATACAAATGTTCCAATGGAAGCAAGAATTTCCAGGAAC  
ATTTGGAGCATTTCTGTTCTGAGCAGAAACACCGTTTTCAAGTAATGTTCGATCGATTAC  
GTATTAATCAATATTCGATTGATTGGTCCGAGGTTATCGACAAACAAGATTTGTCCAAGT  
CACTTCGTTCTTTTTGTCCAAGTCACTTCTCCTTTTGTCCAAGTCGCTTCTCTTTTTAT  
CTAAGTCACTTCTTTTTCTGTTGTGAGTCTCGGGAATATCTCCATTATAGGGCCGAAA  
TCCACATCTATGAATTGAAAGGTCTGAATGATCAACCCGGCAATCAGTTGTTAGAATCAA  
TAGGTGTTCAAATCGTTTATTTGAATAAATTGAAACCCCTTCTTATTGTATGATCATGATA  
CTTCCCAAAGATCGAAATTTTTAATCAATACAGGAACAATATTACCTTTTTTGTTCACAA  
AGATACAAAAGTGCATGATTGACTCATTCCGTACTAGAAAAATCGCAAGAAATCCTTTG  
AGAACACGGATTTCTTCTCAATGATATCCACGATCGAAACAATTGGTTGAATCCTC  
AGAAAAGTTCATTGATATCTTCTTTTTATAGAGCAAACAGACTTCAATCTTGAATCATC  
CCCATTGCTTCTGGTTCTATTGTAACAAAGGATTCATTTTTATGGGAAAAGACCCGTA  
TCCATAATTATGATTTTACATATGCACAATTCCCAATATCTTGTGATTTCGCAACAAAA  
AATTTTCTTTGTGTTTCGGTAAAAAAAACATGTTTGGGAGAGAGAGACTATTTTAC  
CAATTGAGTCACAGGTATCTGGCATATTCATACCTAACAAATGTTTCACAAAGTGGTAACA  
AAACGTATAACTGTACAAATCTTCCATTTTTCAATTCGATCTGATCCATCCGTTCTTA  
TTTACTCGATTGCAGACATTTCCGGGAACACCTGTAATAGAGGAACAAATAGTCAATTTTG  
AAAGAACTTATTGTCAGTCTCTTTCAGATATGAATCTATCTGATTGAGAAGGAAAAACT

TGCATCACTATCTCCGTTTCAATTCAAACATGGGTTTGATTACACTCCATGTTTTGAGA  
AATATGTGCCGTCGCGAAAGAGGAAAGAACTGAGTCTATGTCTAAAGAAAAACGTTGAGA  
AGGGGGAAGTAGGTAGAACCCCTTCAACGAGATAGTGCTTTTTCAAATCTCTCAAAATGGA  
ATTTGTTCCAAACCTATATGCCATGGTTCCTTACTTGGACGGGGGTAAATATCTTTATT  
TCACCTTAAAAACAATATTTATTTGATATTGAATATTCCTTTCAATATTCCTAAGTG  
ACAGTCAAAATTTTGTGTCCGTTTTTCATGATATTATGCATGGATCAGATATATCATGGC  
CAATTCCTCAGAAAAAGTGGTGGTCGATTCCTCCACACGGAATCTGATAAGTGAGAGTT  
CGAGTAAGTGTTTACAGAATCTTCTTCTGTCCGAAGAAATGATTCATCGAAATAATGAGT  
CACCCATTCCATTGATATGGACACATCTGAGATCACCAAATGCTTGGGAGTTCCTCTATT  
CAATTCCTTTCTCTTCTTGTGTGCTGGATATCTCGTTCGTACACATCTTCTCTTTGTTT  
TCCGAGCCTCTAGTGAGTTACAGACAGAGTTAGAAAAGATCAAATCTTTGATGATTCCAT  
CATACATGATTGAGTTGGGAAAACCTTCTGGATAGGTATCCTACATCTGAACCTGAATTCCT  
TCTGGTTAAAGAATCTCTTCTAGTTGCTCTGGAACAATTAGGAGATTCCTCTGGAAGAAA  
TACGGGATTCTGCTTCTGGCGGCAACATGCTATTTGGGTGGTGGTCCCGCTTATGGGGTCA  
AATCAATACGTTTCAAGAGAAATATTTGAATATCAATCTCATCGATCTCATCAGTATCA  
TACCAAATCCCATCAATCGAATCACTTTTTCGAGAAAATACGAGACATCTAAGTCGTACAA  
GTAAAGAGATCTATTCTATGATAAGAAAAGAAAAACGTGAACGGTGATTGGATTGATG  
ATAAAATAGAATCCTGGGTGCGGAACAGTGATTCGATTGATGATGAAGAAAGAGAATCT  
TGGTTCAGTTCCTCCACCTTAACGACGGAAAAAGGATTGATCAAATCTATTGAGTCTGA  
CTCATAGTGATCGTTTTATCAAAGAATGACTCTGTTTATCAAATGATTGAACAACCGGGAT  
CCATTTACTTACGATACTTAGTTGACATTCATAAAAAGTATCTAATGAATTATGAGTTCA  
ATAGATCCTGTTTAGCAGAAAGACGGATATTCCTTGCTCATTATCAGACAATCACTTATT  
CACAAACCTCGTGTGGGGCTAATAGTTCTCATTTCCCATCTCATGGAAAACCTTTTCGC  
TCCGCTTAGCCCTATCCCTTCTAGGGGTATTTAGTGATAGGTTCTATAGGAACTGGAC  
GATCCTATTTGGTCAAATACCTAGCGACAACTCCTATGTTCCCTTTCATTACGGTATTTTC  
CGAACAAGTTCTCTGGATGACAAGCCTAAAGGTTATCTTATTGACGATATCGATATTGATG  
ATAGTGACGATATCGATATTGATGATAGTGACGATATTGATGATGACCTTGATACGGAGC  
TGCTAACTATGACGAATGTGCTAACTATGTATATGACGCCGAAAATAGACCGATTTGATA  
CCACCCTTCAATTAGAATTAGCAAAAGCAATGTCCCTTGCAATAATATGGATTCCAAACA  
TTCATGATCTGTATGTGAATGAGTCGAATTACTTATCCCTCGGTCTATTAGTGAACATATC  
TCTCCAGAGATAGTGAAGATGTTCCACTAGAATAATCTTGTATTGCTTCGACTCATA  
TTCCCCAAAAAGTGGATCCCCTCTAATAGCTCCGAATAAAATTAATACATGCATTAAGA  
TACGAAGGCTTCTTATTCACAACAACGAAAGCACTTTTTTCATTCTTTCATATACTAGGG  
GATTTCACTTGGAAAAGAAAATGTTCCATACTAACAGTAACAGATTTCGGGTCCATAACCA  
TGGGTTCCAATGCACGAGATCTTGTAGCACTTACCAATGAGGCCCTATCAATTAGTATTA  
CACAGAAGAAATCAATTATAGACACTAATACAATTAGATCAGCTCTTCATAGACAACTT  
GGGATTTGCGATCCCAGGTAAGATCGGTTGAGGATCATGGGATCCTTTTCTATCAGATAG  
GAAGGGCTGTTGCACAAAATGTACTTCTAAGTAATTGCCCCATAGATCCTATATCTATCT  
ATATGAAGAAGAAATCATGTAAGGAAGGGGATTCTTATTTGTACAAATGGTACTTCGAAC  
TTGGAACGAGCATGAAGAAATTAACGATACTTCTTTATCTTTTGAGTTGTTCTGCCGGAT  
CGGTCGCTCAAGATCTTTGGTCTCCACCCGACCCGATGAAAAAATTGGATCACTTCTT  
ATGGATTGCTTGAGAAATGATCTGATCTAGTTTATGGCCTATTAGAAGTCGAAGGCGCT  
TGTTGGGATCCTCAGGCAGAGAAAAGATTGCAGTCAGTTTGATAATGATCGAGTGACAT  
TGCTTCTTCGGTCCGAACCAAGGAATCAGTTAGATATGATGCAAAACGGATCTTGTTCTA  
TCGTTGATCAGAGATTTCTATATGAAAAATACGAATCGGAGTTTGAAGAAGGGGAAAGAG  
AAGGAGCCCTCGACCCGCAACAGATAGAGGAGGATTTATTCAATCACATAGTTTGGGCTC  
CTAGAATATGGCGCCCTTGTTGGCAATCTATTTGATTGTATCGAAAGGACCAATGAATTGG  
GATTTCCCTATTGGGCGAGGTCATTTTCGGGGCAAGCGGATCATTTATCATAAAGAGGATG  
AGCTTCAAGAGAATGATTCGGAGTTCTTGACAGAGTGGAACCATGCAGTACCAGACACGAG  
ATAGATCTTCCAAAGAACAAGGCTTTTTTCGAATAAGCCAATTCATTGGGACCTGCAG  
ATCCATTCTTTTTCTATTCAAAGATCAGCCCTTTGTCTCTGTGTTTTACGCCGAGAAT  
TCTTTGCAGATGAAGAGATGTCAAAGGGCTTATTACTTCCCAACAAATCCTCTACAT  
CTATATATAAACGCTGGTTCATCAAGAATACGCAAGAAAAGCACTTCGAATTGTTGATTC  
ATCGCCAGAGATGGCTTCGAACCAATAGTTCATTATCTAATGGATCTTTCGTTCTAATA  
CTCCATCCGAGAGTTATCAGTATTTATCAAATCTGTTCTATCTAACGGAACGCTATTGG  
ATCAAATGACAAGGCATTTGTTGAGAAAGAGATGGCTTTTCCCGGATGAAATGAAACATT  
TGATTCATGTAACAGGCTAAAACGGACTATGTACTTTATCTGTTGGGTTACGGGCGGGCA  
TTTTACCAGAGGTTTCTATTGTATCAATTTACCCTTGTTGATTCCTGTTGAAGCATATA  
CTCGGGGGGTGGGTGCAGGGCGGACGATTTCAAACCGGACTCCTCATTCAATTAGATAGAG  
AAGATCGCAAGATTTCTGTATCCGCTGCCGAACCTATTCCAATCCAACAGCCCGGACT  
CGGATCGTGGGGATCGATGGAATACTTCGTATCAACAGATACTTGGTATATGTATATCAA  
TATTGATTAGATCCGAGATCTGTTATTGAATTGCTCATTCAATGAGCATTTCAATATTAT  
GCCTTGAAAGAGGACTCGAACCTCCACGCTCTTTAGCAGGAGATTTTGGTCTCGCGTGT  
TACCATTTACCATCAAGGCATCTTGAAAGTGAATCGTATTCCATGAATATGATATCTAT  
CTAGTGTGATATATGGAATATATGACAAAGGTGGAGTTTGGAGTATTTCTATCGATCGG  
TCATGTATATAGCCCCGAGTCGGACATCAAATGCTTCGATTGAAATATCCGGAGGAT

ACCTTATATATATCAAAAAGATGTACAATCAAACCTATTTCTCGATTCAATCGAAGCCCA  
AAGAAGTTAATATGGTACCCAAATAACGATAGATATGTAAAAAGCAGGTCCGATTACGCC  
TATTCCTAATCCTAAATGGAATGTAACGACGTAGGGATCCATATGTAAACATAGTCTCTA  
TTTACATATGCTCGAATGACCCCTTCTCATAATGAGAATGTACATAACCCATATCCGGTC  
TGGTCCGGTATGGAATGAACCTTATAATCTGATGATCGAGTCGATTCCATGATTATAAGTT  
CATAACCCAGCCCATTTCCATTTTGGGCGGAACAGATCTACTAATTTCTTTATTCAGT  
TAGTAAAGGGATCTTGAACTAAGAAATAGACCCTAGAAGCTAAAAGAGGGTATCCTGAG  
CAATTGCAATAATTGGATTCAATGATATTCCTGGTATAGTAGATGCTATCACACATACAA  
TCATACTCAATTCGATGGAATTGTTTGATCTTAAGGGGATCTTCTATAATTTGCGACGT  
GAGGGGTTATTTCTTGGTTTCGTCCAGTCATTAATAACTTGATTATTTTTAGATAATAGT  
AGATAGAAACAACGCTCGTAAGGAGTCTTATTGAAACCAAGAAATATAGGCCTGCCTGCC  
ATCCACACCAGAAATAGATGGAGTTTTCGAAAAAACCTGCTAGTGGAGGAAGACCTCCTA  
GGGATAAGAGACATAGGGCTGAAGAGAGAGCCAAAAAGGATCTTTCGTGTATAATCCTG  
CATAATCTCGAATGTTATCAGTTCGGGTACGTAGACCAATGAGACAATGCGAGCAAAAG  
TTCTTAGATTTCATGGAGATATAGAACAGCATATAAGTTATCATGCTTGCATATCCATCAT  
TTGAGTCTCCAACAATTATTCCAATAATTACATATCCGATTTGACCTATGGACGAATATG  
CAAGCATACGTTTCATGCTTGTTTGAGTAATAGCAATGAGATTCCTCAATATCATGCTAA  
GAATAGCTAGGATTTCCAGAAGAAGATGCCATTCGTTTGATGAGAAATAAAAGGAATAT  
CGAAAATTCGAGTGGCTGAAGCTGAAGCAGCTACTTTCGAAGTAACAGAAAGAAAAGCAA  
CGACTGGAGTGGGAGAGTCAGAGTCGAAAAGAGGATTCTCACTTCTTCTCTCATTCAA  
AACCGTGCATGAGACTTTCATCTCGCACGGCTCCTAAGTGATAAAAGAAAGAACTCA  
CCTTCTTTCTTTTTTGATTACCTTCTCGCGTATGTATAAGACCGAATCCATTCGATTTT  
TAAAAAGGATTACTAATCCTTAACTTTTCGAGGAATCCTTCATCAGTGGTTGTGAATGAC  
TGACTTTTTCAATCTTTTCGACCCCGGTTCCGTAGGAGCACAGTCAGAAAGATTGAGAA  
ATAGAACCATCTGATTTGATTTCGTTCTCAATAGCCATGAGATGATCATCTTAGGGTGATC  
CTTTTGTCGACGGATGCTCCTATTACACTCGTAGTCTCTGAAGGATGAGAACCACACTATG  
TAGCATCTACATCGATAATTCAAGTATTGTATACGTCATTAGTCCGATCCTTTGTAGGAA  
CTACCCGTAATAACGAAGTTGCAAAATGGATCTGTTTATCATAAAGAGATTGCTTGTTC  
TGACCCCTGCTTCACTTAAATTGTTATTTGAACAAAAAGATCACAATAAACTTTTGTA  
AGTTATGTCTTGGTCCGAGTGGGGATAGCATTCTCTTCTGTCATGTCCATGGAGTTTTGA  
AAAATCCAACATCTCAGAGATAGATATAGAGTAGGAATTTGTCGAACGAACCGCACTC  
CTTCGTATACGTCAGGAGTCCATTGATGAGAAGGGGCTGGGGAAAGCTGAACCCAATTC  
CTACAGTGATGGATATAAGCGCAATGGAAATTCCTGGGGAGTTATACATTTGTGTATTGA  
TAAGACCATTCACTATTCTTGAAGCTCGATCTCTCCCCGGATGAACCATATAGCCAAG  
AGAAACCATGAACCAGAAATAGAAGAGCTTGCCCCACCCATGAGTAAATATTTCTGATAG  
CCTCATTAGACCGTACATCTCTCTTGGTATATCCAGATAATAGGTAGGAGCATAAACTGA  
AAGATTCTGGAGCTACAAAGATAGTTATTAATCGTTAGCACCAATAAAAACATTCCTC  
CTAGAGTAGCTGTTAATACGAATAACAAAACTCTGTTATAGCCATTTCTGTACATTCAA  
TGTACTCTACGGATAGAGGAATACATAGAGTTGAACATAGTAAATAAGAAATTGAAAGA  
TTTCGTTGAAATTGTTTCGTTTGGAAATTTCCCGAAAAGCTAATCATAGGTTCTTCTCTCC  
ATCGGAACAATAGGGCCGTTATGCTCATTACTAACTTGTTGAAGAGATGAAATATAACC  
AAGGTATATCTTTTGTATGACAGGTTGAATCGATCATCAGAAGAAGATTAGGCCAAAAA  
TGAGGATACATTCTGGGAAAATGAAACTTCCATGGAAGAGAAGCAATGAAACGCTTTCA  
TAAAAATTCTCGTAGAATCGAGAATGAAGTTTTCTATTCTGTACATGCCAGATCCTGAATT  
AGTAACGCATCCAATCTCCGAAAAAGTCCCAATTGTTTCGAACTTTTCGATTTTGGAAAT  
GGGATATTTACGGAATCCCCATGAACAGGATCAAACCTTATTCATGGTATTTCCATGAG  
ATTCTCTCTTCTTATTCTTAAGAAAGCCCCGAGAGGGCTAGTTGATCCATGATTTATG  
TTTCATCTTTCTTTCTCTTTTCGTTTGTTCGAGAAAGATATCGATCCATTCCAATCTT  
TCTTTTCTATTGATTCTTTCCGATCGAGATGTATGGATCCACGGATCTATGTGTCTAT  
ATAGATCCTGTTTCATGGATTAACGAAAATGTGCAAAAGCTCTATTTGCCTCTGCCATCT  
ATGAGTCTCTTCTTTTTCGCTATGGCATCGCCACTCCCTTTGGCAGCATCCACTAATTC  
GGACTTAATTTGAAAGCCATATTTTCGACCCGACGTTTTCGGGATGCCCTAATAACCA  
ACGAATGGCAAGTGCTTTTCTTGTGTAGATTCTATTTCAATAGGAACCTTGATGAGTCGA  
TCCACCTACACGCTCTGCTTTGACTGCTATATCGGGAGTTACTCCACGTATTGCTTGACG  
TAAACAGATAGTGGATTGTTTCTGTCTTTTGTGAATCTTTTTCACGGCTTGATAGAT  
AATTTGATAAGCCAATGATTTTTTTCGTTGTTTCAGAAATACGGTTAACCAACATGTTAAC  
TAATCGATTACGATAAATGGATCGGATTTTGACAGTTTTTCTCTGCAGTACCTCGACG  
TGACATGAGCGTGAAAGAGGTTCAAGAAATCCGTTTTCTTTTATACGGGCTAAAAACGAA  
TCACTTATTTTGGCTTTTTCACCCCATATTGTAGGGTGGATCTCGAAAGATATGAAAGAT  
CTCCCTCCAAGCCGTACATACGACTTTCATCGAATACGGCTTTCCACAGAATTTGATATG  
TATCTATGAAATCGAGTATGGAATTCTGTTTACTCACTTTAAATTGAGTAGCCGTTTCCC  
TCCTTTTCTCTGCTAGGATTGGAATCCTGTATTTTACATATCCATACGATCGAGTCCCTG  
GGTTTCCGAAATAGTGTAAAAAGAAGTGCTTCGAATCATTGCTATTTGACTCGGACCTGT  
TCTGAAAAAGTCGAGGTATTTTCGAATTGTTTGTGACACGGACAAAGTAAGGGAAAACT  
CTGAAATGATTTCAATATTGAACCTTGACATATAATAGTTCCGAATCGAATCTCTTTAG  
AAAGAAGATCTTTTGTCTCATGGTAGCTGCTCCAGTCCCCTTACGAACTTTTCGTGATT

GGGTTAGCCATACACTTCACATGTTTCTAGCGATTACATGGCATCATCCAATGATACAA  
GTCTTGGATAAGAATCTACAACGCACCTAGAACGCCCTTGTGACGATCCTTTACTCCGAC  
AGCATCTAAGGTTCCTCGAACAATGTGATATCTCACACCGGGTAAATCCTTAACCCCTCC  
TCCTCTTACTAAGACTACAGAATGTTCTTGTGAATTATGGCCAATACCAGGTATATAAGC  
AGTGATTTCAAATCCAGAGGTTAATCGTACTCTGGCAACTTTACGTAAGGCAGAGTTTGG  
TTTTTTGGGGGTGATAGTGGAAAAGTTGACAGATAAGTCACCCCTACTGTCACTCTACAG  
AACCGTACATGAGATTTTCACCTCATACGGCTCCTCGTTCAATCTTTCGAAGTAATTGG  
GTCCTTTTCCCTCGTTCGAGAATCTCCTCCCTTCTTCCACTCCGTCGCCGAAGAGTAAC  
GACCAATTCAGTCACGTTCTCATGTTCCAATTGAACACTTTCCATTTTGTATTATGATCA  
AAGGAGAGATTATTCTTTTACCAAAATATGCGGATCAAATCACGATCTTATAATAAGA  
ACAAGAGATCTTCTCGATCAATCCCTTTGCCCTCATTCTTCGAGAATCAGAAAGATCCT  
TTTTGAGTTTGAATTTGTTCATTGGAACTCTTATTTATTTTGTATTTTTATTTATTT  
ATTTCTTTGATCTTTATTTTCGATTTTCTTTCCCTCTCTTTTCTTTTATTCCTTCCA  
TCATTCTTAAGTCCCATAGGTTTGATCCTGTAGAATCTGACCCATTTTCTCATCGAACG  
AGGGGTACGAAATAAATCCGATGATTTTTCGATCAAAAGTACTATGTGAAATCTTCGGT  
TTTTTCTCTTCTCTATCCCATAGGTACAGCGTTTGAATCAATAGAGAACCTTTTCTTC  
TGTATGAATCGATATTATTACATTCCAATTCTTCCGATACCTCCCAAGGAAAATCCCG  
AATTGGATCCCAAATTGACGGGTTGGTGTGAGCTTATCCATGCGGTTATGCACTCTTCGA  
ATAGGAATCCATTTTCTGAAAGATCCTGGCTTTCGTGCTTTGGCGGGTCGTCCGAGATCC  
TTTCGATGACCTGATTGTTGTGTTGAAGGATATCTATATGATCCGATCGATTGCGTAAGGC  
CCGCGGTAGCAACGGAGCCGGGAAAAGTATACAGAAAAGACAGTTCTTTTCTATATATTA  
GTATTAGTTAGTGATCCCGGCTCGGTGAGTCCTTCTTCCGTGATGAAGTGTGGCACCA  
GTCTACATTTTGTCTCTGTGGACCGAGGAGAAAGGGGGCTCAGCGGGAAGAGGATGTG  
ACCATGAGAGAAGCAAGGAGGTCAACCTGTTTCAAATATACAAATGGATTCTGGCAATGC  
AATGTAGTTGGACCCCTCATGTCGATCCGAATGAATCAGTCTTTCACGGAGGTCAATCTT  
TGCTGCTAGGCAAGAGATAGCAAGTTACAATTTCTGTCTCGGTAGGACATGATTTCT  
ATTACTATTAAATTCAGAAATGAAGTAGTTAATGTTGGGGTTACCATTATCCTTTTGTGA  
GTGACGAATCTTGTATGTGTTCCTAAGAACCTAAGAAAAGGAATTTGTCCCTTTTTCGAG  
GTCCTAAAAGGGCGTGGAACACATAAGAACTCTTGAATGGAATGAAAAGAGATGTAG  
CTCCAGTTCTTTCGAAATGGTAAGATCTTTGGCGCAAGAAGAAGGGTTGATCCGTATC  
ATCTTGACTTGGTCTGTGTTCTCTCTCTTTTAAACAATACCGAGTCGGGTTCTTCTCT  
ACCAGTATCGAATAGAACATGCTGAACAAAATCTTCTCTCTGTAAAACCTGCTCGATTTA  
GATCGGGAATCGTACGGATTTTATGAAACCATGTGCTATGGCTCGAATCCGTAGTCAA  
TCCTATTTCCGATAGGAGCAGTTGACAAATTGAATCCAATTTTCCATCTTTTTCGTATCC  
GTAATAGTGCGAAAAGAAGTCCCGGCTCCGAGTTGTTCAAGAGAGTGGCGTTGAGTTTC  
TCGACCCCTTGCTTAGGATTAGTCAGTTCTATTTCTCGATGGGGCAGGGAAGGGATAT  
AATCAGCGGTAGAGTGTCAACCTTGACGTGGTGGAAGTCATCAGTTGAGCCTGATTATC  
CCTAAACCCAACGCAATGTGAGTTTCTATTTTGAATGCTCCCCCGCGTGATCGAAT  
GAGAATGGATAAGAGGCTCGTGGGATTGACGTGAGAGGGTAGGGATGGCTATATTGCTGG  
GAGCGAATCCAGGCTAATATGAAGCGCATGGATACAGCCTTGAATGAAAGACAATTC  
CGAATCAGCTTTGTCTACGAACCGGAAGATTGGTAAGTAATGCAACTATGAATCTCATGG  
AGAGTTCCGATCCCGGCTCAGGTGAACGCTGGCGGCATGCCCTAACACATGCAAGTCGGAC  
GGGAAGTGGTGTTCAGTGCGGACGGGTGAGTAACGCGTAAGAACCTGCCCTTGGGAG  
GGGAACAACAACCTGGAACCGGCTGCTAATACCCCGTAGGCTGAGGAGCAAAGGAGGAAT  
CTGCCCGAGGAGGGGCTGCGCTGATTAGCTAGTTGGTGAGGTAATAGCTTACCAAGGC  
GATGATCAGTAGCTGGTCTGAGAGGATGATCAGCCACACTGGGACTGAGACACGGCCCAG  
ACTCTACGGGAGGCAGCAGTAGTGGGAATTTGCGCAATGGGCGAAAGCCTGACGCGACAA  
TGCCGCGTGAGGAAGAAGGCCACGGGTCGTGAACCTCTTTTCCCGGAGAAGAAGCAAT  
GACGGTATCTGAGGAATAAGCATCGGCTAACTCTGTGCCAGCAGCCGCGGTAGACAGAG  
GATGCAAGCGTTATCTGGAATGATTGGGCGTAAGGCGTCTGTAGGTGGCTTTTCAAGTCC  
GCCGTCCAATCCCAGGGCTCAACCTTGACAGGCGGTGGAACCTACCAAGCTGGAGTACG  
GTAGGGGCAGAGGGAATTTCCGGTGGAGCGGTGAAATGCGTAGAGATCGAAAGAACC  
AACGGCGAAAGCACCTGCTGGGCCGACACTGACACTGAGAGACGAAGCTAGGGGAGCG  
AATGGGATTAGATACCCAGTAGTCTTAGCCGTAAACGATGGATACTAGGCGCTGTGCGT  
ATCGACCCGTGCACTGCTGTAGCTAACGCGTTAAGTACCCCGCTGGGGAGTACGGTCGC  
AAGACTGAAACTCAAAGGAATTGACGGGGGCCGCACAAGCGGTGAGCATGTGGTTTAA  
TTCGATGCAACGCGAAGAACCTTACCAGGGCTTGACATGCCGTGAATCCTCTTGAAAGAG  
AGGGGTGCTTTCGGGAACGCGGACACAGGTGGTGATGGCTGTCGTGAGCTGTCGTGCGCTA  
AGGTGTTGGGTTAAGTCCCGCAACGAGCGCAACCTCGTGTGTTAGTTGCCACCATTGAGT  
TTGAACCTGAACAGACCGCCGGTGATAAGCCGGAGGAAGGTGAGGATGACGTCAAGTC  
ATCATGCCCTTATGCCCTGGGCGACACACGTGTACAATGGCCGGGACAAAGGGTCGCG  
ATCCCGCCAGGGTGAGCTAACTCCAAAAACCGTCTTAAAGTTCCGATTGACAGGCTGCAAC  
TCGCTGCAATGAAGCCGAATCGCTAGTAATCGCCGGTCAGCCATACGGCGGTGAATACG  
TTCCCGGCTTGTACACACCGCCGTCACACTGTGGGAGCTGGCTATGCCCGAAGTCGT  
TACCTTAACCGCAAGGAGGGGATGCCGAAGGCGGGGCTAGTGACTGGAGTGAAGTCGTA  
ACAAGGTAGCCGTACTGGAAGGTGCGGCTGGATCACCTCCTTTTTCAGGGAGAGCTAAAGA

AGCGAGCTACGTCTGAGCTAAGCTTGGAGATGGAAGTCTTCTTTCGTTTCTCGACGGTGA  
AGTAAGACAAGCTCATGAGCTTATTATCCTAGGTGCGAACAAGTTGATAGGATCCCCTTT  
TTTACGTCCCCATGCCCTCCCGTGTGGCGACATGGGGGCGCAAAAAGGAAAGAGAGGGA  
TGGGCTTCTCTCGCTTTTGGCATAGCGGGCTCCCCGTGGGGGGCCCGCAAGGGCTATT  
AGCTCAGTGGTAGAGCGCGCCCTGATAATTGCGTCGTTGTGCCTGGGCTGTGAGGGCTC  
TCAGCCACATGGATAGTTCAATGTGCTCATCAGCGCCTGACCCGGGGATGTGGATCATCC  
AAGGCACATTAGCATGGCGTACTCCTCCTGTTGCAACCGGAGTTTGAACCAAACCTTCTC  
CTCAGGAGGATAGATGGGGCGATTCAAGTGAGATCCAATGTAGATCCAACCTTCTATTCA  
CTCGTGGGATCCGGGCGGTCCGGGGGGGACCACCATGGCTCCTCTCTCTCGAGAATCCA  
TACATCCCTTATCAGTGTATGGACAGCTATCTCTCGAGCACAGGTTTAGGTTCGGCCTCA  
ATGGGAAAATGGAGCACCTAACAAACGCATCTTCACAGACCAAGAACTACGAGATCACCCC  
TTTCATTCTGGGTGACGGAGGGATCGTACCATTTCGAGCCTTTTTTTTTTCATGCTTTTCC  
CGCGGAGGTCTGGAGAAAGCAGCAATCAATAGGATTTCCTAATCCTCCCTTCCCGAAAG  
GAAGAACGTGAAATCTTTTTCTTTCCGTCAGGACAGGAGATTGGATCTAGCCATAAG  
AAGAATGCTTGGTATAAATAACTCACTTCTTGGTCTTCGACCCCTCAGTCACTACGAAC  
GCCCCCGATCAGTGCAATGGGATGTGTCTATTATCTATCTCTTGACTCAAAATGGGAG  
CAGGTTTGAAAAAGGATCTTAGAGTGTCTAGGGTTGGGCCAGGAGGTTCTTTAACGCCT  
TCTTTTTCTCTCATCGGAGTTATTTACAAATACTTGCCATGGTAAGGAAGAAGGTGGG  
AACAGCACACTTGGAGAGCGCAGTACAACGGAGAGTTGTATGCTGCGTTTCGGGAAGGAT  
GAATCGCCCCCGAAAAAGAAATCTATTGATTCTCTCCAATTGGTTGGATCGTAGGTGCGA  
TGATTTACTTCACGGGCGAGGTCTCTGGTTCAGTCCAGGATGGCCCAGCTGCGCCAGGG  
AAAAGAATCGAAGAAGCATCTGACTCCTTCATGCATGCTCCACTGGGCTCGGGGGGATAT  
AGTTCAGTTGGTAGAGTCCCGTCTTGCAATTGGGTCGTTGCGATTACGGGTGGATGTC  
TAATTGTCCAGGCGGTAAATGATAGTATCTTGTACCTGAACCGTGGCTCACTTTTTCTAA  
GTAATGGGGAAGAGGACCGAAACATGCCACTGAAAGACTCTACTGAGACAAAGATGGGCT  
GTCAAGAACGTAGAGGAGGTAGGATGGGCAGTTGGTCAGATCTAGTATGGATCGTACATG  
GACGATAGTTGGAGTCGGCGGCTCTCCTAGGGTTCCCTCATCTGGATCCCTGGGGAAGAG  
GATCAAGTTGGCCCTTGCGAACAGCTTGATGCACTATCTCCCTTCAACCTTTGAGCGAA  
ATGTGGCAAAAGGAAGGAAAATCCATGGACCGACCCCATCGTCTCCACCCCGTAGGAACT  
ACGAGATCACCCCAAGGACGCCCTTCGGCATCCAGGGGTCACAGACCGACCATAGACCCTG  
TTCAATAAGTGGAAACGCATTAGCTGTCCGCTCTCCGGTTGGGCAGTAAGGGTCGGAGA  
GGCAATCACTCATTTCTTAAAACAGCATTCTTAAGACCAAAGAGTCGGGCGGAAAAAGGG  
GAAGAGCTCCCGTTCCTGGTTCTCTGTAGCTGGATCCTCCGGAACCACAAGAACTCCTT  
AGAATGGGATTCCAACCTCAGCACCTTTGAGATTTTGAGAAGAGTTGCTCTTTGGAGAGC  
ACAGTACGATGAAAGTTGTAAGCTGTGTTCCGGGGGGAGTTATTGTCTATCGTTGGCTC  
TATGATAGAATCAGTCGGGGAGGCCGAGAGCGGTGGTTTACCCTGTGGCGGATGTCAG  
CGGTTTCGAGTCCGCTTATCTCCAGCTCGTGACCTTAGCCGATGCAAAGGTATATGATAGC  
ACCCAATTTTTCCGATTCCGGCAGTTCGATCTATGATTTCTCATTCATGGACGTTGATAAG  
ATCCTTCCATTTAGCAGACCTTAGGATGGCATAGCCAACACATTAATGGCGAGGTTCAA  
ACGAGGAAAGGCTTACGGTGGATACCTTAGGCACCCAGAGAGGAGGAAGGGCGTAGTAAGC  
GACGAAATGCTTCGGGAAGTTGAAAATAAGCATAGATCCGGAGATTCCCGAATAGGTCAA  
CCTTTGAACTGCTGCTGAATCCATGGGCAGGCAAGAGACAACCTGGCGAACTGAAACAT  
CTTAGTAGCCAGAGGAAAAGAAAGCAAAAGCGATTTCCGTAGTAGCGGCGAGCGAAATGG  
GAGCAGCTAAACCGTAAAACGAGGTTGTGGGAGAGCAATACAAGCGTCGTGCTGCTAG  
GCGAAGCGGTGGAGTGTGCACCTAGATGGATAGAGTCCAGTAGCCGAAAGCATCACTA  
GCTTACGCTCTGACCCGAGTAGCATGGGGCACGTGGAATCCCGTGTGAATCAGCAAGGAC  
CCCTTTGCAAGGCTAAATACTCTGGGTGACCGATAGCGAAGTAGTACCGTGAGGGAAAG  
GTGAAAAGAACCCCCATCGGGGAGTGAAATAGAACATGAAACCGTGAGCTCCCAAGCAGT  
GGGAGGAGAAATCTCTGACCGCGTGCTGTTGAAGAATGAGCCGGCGACTCTTAGGCAGT  
GGCTTGGTTAAGGGAACCCACCGGAGCCGTAGCGAAAGCGCGTCTTCATAGGGTAATTGT  
CACTGCTTATGGACCCGAACCTGGGTGATCTATCCATGACCAGGATGAAGCTTGGGTGAA  
ACTAAGTGGAGGTCCGAACCGACTGATGTTGAAGAATCAGCGGATGAGTTGTGGTTAGGG  
GTGAAATGCCACTCGAACCAGAGCTAGCTGGTTCTCCCCGAAATGCGTTGAGGCGCAGC  
AGTTGACTGGACATCTAGGGGTAAAGCGCTGTTTCGGTGCGGGCCGCGAGAGCGGTACCA  
AATCGAGGCAACCTCTGAATACTAGATATGACCCAAAATAACAGGGGTCAAGTTCCGGAC  
AGTGAGACGATGGGGGATAAGCTTCATCGTCGAGAGGGAACAGCCCGGATCACCAGCTA  
AGGCCCTAAATGACCGCTCAGTAATAAAGGAGGTAGGGGTGCAGAGACAGCCAGGAGGT  
TTGCTTAGAAGCAGCCCTTAGCCTTGAAAGAGTGCCTAATAGCTCACTGATCGAGTGCTCTTG  
CGCCGAAGATGAACGGGGCTAAGCGATCTGCCGAAGCTGTGGGATGTAAAAATGCATCGG  
TAGGGGAGCGTTCCGCTTAGAGGGAAGCTCCCGCGCAGCAGGTGTGGACGAAGCGGAAG  
CGAGAATGTCGGCTTGAGTAACGCAACATTGGTGAGAATCCAATGCCCGAAAACCTAA  
GGGTTCTCCGCAAGGTTCTGCCACGGAGGGTGAGTCAGGGCTAAGATCAGGCCGAAAG  
GCGTAGTCGATGGACAACAGGTGAATATTCCTGTAACCCCTTGTTGGTCCCGAGGTAC  
GGAGGAGCTAGGTTAGCCTGAAAGATGGTTATCGGTTCAAGGACGCAAGGTCACTTGCT  
TTTTTAGGGCAGGGTAAGAAGGGGTAGAGGAAATGCCCGAGCCAATGTCCGAGTACCAG  
GCGCTACGGCGCTGAAGTAACTCATGCCATACTCCAGGAAAAGCTCGAAGGACCTTCAA

CAAAAGGGTACCTGTACCCGAAACCGACACAGGTGGGTAGGTAGAGAATACCTAGGGGCA  
CGAGACAACTCTCTCTAAGGAACTCGGCAAAATAGCCCCGTAACTTCGGGAGAAAGGGGTG  
CCTCCTCACAAAGGAGGTGCGAGTGACCAGGCCCGGGCGACTGTTTACCAAAAACACAGG  
TCTCCGCAAAAGTCTGAAGACCATGTATGGGGGCTGACGCCTGCCAGTGCCGGAAGGTTA  
AGGAAGTTGGTGACCTGATGACAGGGGAGCCGGCGACCGAAGCCCCGGTGAACGGCGGCC  
GTAACATAACGGTCCTAAGGTAGCGAAATTCTTGTGGGTAAAGTCCGACCCGCACGA  
AAGGCGTAACGATCTGGGCACTGTCTCGGAGAGAGGCTCGGTGAAATAGACATGTCTGTG  
AAGATGCGGACTACCTGCACCTGGACAGAAAGACCCTATGAAGCTTTACTGTTCCCTGGG  
ATTGGCTTTGGGCCTTTCTCGCGAGCTTAGGTGGAGGCGAAGAAGGCCCTCTTCGGG  
GGGGCCCGAGCCATCAGTGAGATACCACTCTGGAAGAGCTAGAATTCTAACCTTGTGTCA  
GGACCTACGGGCCAAGGGACAGTCTCAGGTAGACAGTTTCTATGGGGCGTAGGCCTCCCA  
AAAGGTAACGGAGGCGTGCAAAAGTTTCTCGGGCCGACGGAGATTGGCCCTCGAGTGC  
AAAGGCAGAAGGGAGCTTGACTGCAAGACCCGCCGTCGAGCAGGGACGAAAGTCGGCCT  
TAGTGATCCGACGGTGTGAGTGAAGGGCCGTCGCTCAACGGATAAAAGTTACTCTAGG  
GATAACAGGCTGATCTTCCCAAGAGTTCACATCGACGGGAAGGTTTGGCACCTCGATGT  
CGGCTCATCGCATCTTGGGGCTGTAGTAGGTCCCAAGGGTTGGGCTGTTGCCCCATTTAA  
GCGGTACGTGAGCTGGGTTCAGAACGTCGTGAGACAGTTCGGTCCATATCCGGTGTGGGC  
GTAGGGCATTGAGAGGACCTTTCCCTAGTACGAGAGGACCGGGAAGGACGCACCTCTGG  
TGTACAGTTATCGTGCCACGGTAAACGCTGGGTAGCCAAGTGCGGAGCGGATAACTGC  
TGAAAGCATCTAAGTAGTAAGCCACCCCAAGATGAGTGCTCTCCTATTCGGACTTCCCC  
AGAGCCTCCGGTAGCACAGCCGAGACAGCGACGGGTCTCTGCCCCGCGGGGATGGAGC  
GACAGAAGTCTTGAGAATCCAAGATAAGGTCACGGCGAGACGACCGGTTTATCATTACGA  
TAGGTGTCAAGCGGAAGTGCAGTGATGTATGCAGCTGAGGCATCCTAACAGACCGAGAGA  
TTTGAACCTTGTTCTTACATGACCCGATCAATTCGATCAGGCACTCGCCATCTATTTTCA  
TTGTTCAACTGTTTGACAACATGAAAAACCAAAGCTCTGCCCTCCCTCTCTATCTATC  
CAAGGGATGGAAGGGCAGAGGCCTTTGGTGTCCCTTCCAGTCAAGAATTTGGGCTTACA  
ATCACTAGCCAATATTCTCTCATACCTTTCTTCGTTTCATGGTTTCGATATTCTGGTGTCC  
TAGGCGTAGAGGAACACACCAATCCATCCCGAAGTGGTGGTTAAACTCTACTGCGGT  
GACGATACTGTAGGGGAGGTCTGCGGAAAAATAGCTCGACGCCAGGATGATAAAAGCT  
TAACACCTCTTATTCTTATTACTCAAAAAGAAAAAATGAAAAGGTCGTCTTATTCAAAA  
CCCAATTATGACATCCCTTCTCTCCCACTTCAACCTCGGAACGCGCTGTTCTTATAGAG  
AGAAAGGCGCTTTCACGTCCTTCTTAACCCGAATGGCTGAGGGGAGAAAAGGTTCTTTT  
TGAGGGTACTCCAGGGAACAGATCCAGTGGAGACGGGTGGGGCTGTAGCTCAGAGGAT  
TAGAGCAGCTGGGTACGAACCACGGTGTGCGGGGTTCGAATCCCTCCTCGCCACAACCG  
GCCCAAAAGGGAAGGACCTTTCTTTTACCTCTGGGGGTAGGAAAAATCATGATCGGGATAG  
CGGACGCAAAGCTATGGAAGTGGGGTGTGGGTCTTTTGTGCAATGGCCTTATCTTTTT  
ATTTATCGTGAAGGAAAAAATCGATACATATAGTATGCCTGGCCGAAATCAGCATATTG  
TGTTTTACTCCCCGTAACCTTTCTCAGCCAGGCTTGGGAAGAATAGCAGAGCAAATACA  
AGTATTAGTAGCATAGCAAAAATGCGTTCCTCGTCATTAATATGTTTGTCTCGCGGTAATT  
GTGGCCTCTCGGGAGAATCGATGACTGCATCTTTGATGCACCTGCTAGTACATCATCTGAG  
AATTATGAATTGGCTAGTTGTAATAGCCCCAGGGCTATGGAACAAAGGATTATCCCGGA  
TCTACACCGAGGTATTGACGGTGATTCTCAAATATCGCAGAACAGAAATGCGATGAGATAG  
AGTGCAATAGAAACAAAGACAGGGAACGGGTACCTACTCCTAACGGTCAAAGCGAGCCC  
TTTAATTCTGTAATTCTGAATTCTTTAATTAAGAATTCATCAAATCTCCCCAAGTAGGAT  
TCGAACCTACGACCAGTCAGTTAACAGCCAACCGCTCTACCACTGAGCTACTGAGGAATA  
ACGGGAGATTTCGATCTCATAGAGTTCAACTCCCGCTCTCAACCCATGACCAATATGAGCC  
CGAAGCTTCCTTCGTAACTCCCGGAACCTCTTCGTAGTGGCTCCGTTCCATGCCTCATTT  
CATAGGGAACCTCAAAGTGGCTCTATTTTCATTATATTCATCCATCCATATCCCAATATTCAT  
CCATATCCCAATTCCATTCAATTAATATCCCTTTGGTGTTCATTGACATAAGAGATGTCAT  
TCAATCGAAGAAGAGGGTATCATTTGACATAAAAGATGTCATTTCTAGTCTATCTGTTTCT  
ATCTATGGAAAGTGAAGAAATCATCATATAGTAATCGAGAAATGCAATAGAAAAGAAAA  
AAGGGAGGTTTGTGATGATTTTGAAATCTTTTCTACTAGGTAATCTATTATCCTTATGCA  
TGAAGATAATAAATTCGGTCGTTGTGGTCGGAATCTATTATGGATTCTGACCACATCTCT  
CCATAGGGCCCTCTTATCTTTTCTCTCCGAGCTAGGATTATGGAAGAAGGAACCGAGA  
AGGAGGTATCAGCAACAACTGGTTTTATTACGGGACAGCTCATGATGTTTCATATCGATCT  
ATTATGCGCCTCTGCATCTAGCATTTGGGTAGACCTCATACAATAACTGTCTAGTTCTAC  
CGTATCTTTTGTTCATTCTTCTGGAACAATCACAACACTTTTGGATTATGGATCTA  
CTACCAGAAATTCATGCGTAATCTCAGCATTCAATGTGTATTCCTGAATAATCTCATTT  
TTCAATTATTCAACCATTTTCATTTTACCAAGTTCACCGTTAGTCAGATTAGTCAACATTT  
ATATGTTTCGATGCAACAACAAGATGTTATTTGTAACAAGTAGTTTGTGGTTGGTTAA  
TTGGTCACATTTTCTTCATGAATGGGTGGATTGGTATTATCTGGATACGGCAAAATC  
ATTCTATTAGATCGAATGTACTTATTCGATCTAATAAGTACCTTGTGTGAGAAATTGAGAA  
ATTCTATGGCTCGAATCTTACTATTCTCTTATTTATCACCTGTGTCTACTATTAGGCA  
GAATACCGTCGCCTATTGTCCTACTAAGAACTGAAAGAAACCTCAAAACGGGAAGAAAGGG  
GGGAAAGTGAGGAAGAAACAGATGTAGAAATAGAAAAAATCCGAAACGAAGGGGACTA  
AACAGGAACAAGAGGATCCACCGAAGAAGACCTTCCCTTTGTTTCGGAAGAAGGGAGG

ATCCAAAAAACTACATGAAAAAAAAGAGGCAAGAAATTTTGAAGTTAGAAATACTTA  
AAGAGAAAGAAGTAAAGACCTCTTCTGGTTTGAAAAACCTCTTGTGAATCTCTTTTCG  
ACTATAAACGATGTAATCGTCCATTGAGATATATAAAAAAAATTTATTTCAAATGCTG  
TAAGAAATGAAATGTCACAATATTTTTTTCACGTATGTCCAGTTGATGGAAAAACAATAA  
TATCTTTTACATATCCACCCAGTTTATCGATTTTTTTGGAAATGATGCAAAGAAAGATGT  
CTTTGTGTACGACCGAAAACTATCCCCGAAGATCTGTATAATCATTGGGTTTATACCA  
ATGAACAAAAAAGGTACAGCTTGAGCAATGAATTCATAAACCGAATAGAAGTTCTAAACA  
AGGGATCTCTTACTATGGATGTGCTTGAAAAAGGACCAGATTGTATAATGATAAAAAATA  
ACCAAGCTAGTCACTTCTTATTCTATTCAAACAAAAAGAATAGATAATAGATATAGTA  
AATTAATAAAAAAGCCGGATACATATGATAAATATACAAAGAGATAAGAAGAGATTGCGCC  
TCCCCCACAATTTGATCCCTTCTCCTATAAAGAACTTGCAACACCAACACCATTGGT  
AATTCCGTC AATTACCCGTCTATCTAAAAAATGAGTTACTTCAGCTAATCCTCTTATACT  
TGAGTTAAGCATCTTGCATAAAAAAGATCTATGTAACCACGATTATATGACCAATTGTA  
TATCACATTTATTATTCGGTCCAATAAAATTTTCTTAGAGCCTGTTTTTTAACAAATGA  
ATTGATTAAAGTCCAAATCTGAAAAGATGAATTAACAGACCCATATAAAATAGACGCTAT  
GAATATTCAAAAACAGGCTACTGACTGAATAAATTCGATTTGTCACAAATTCATACCA  
ATCCACAGAATAGTTCGAATTTTGTATGTAAGGTTTATTGATGGAGTTAACCATTTTGA  
TAATATATCAAATCGATTACTCCTTGATCGAAAGGAATTCCTATGGATCCACGAACAA  
AGTAAATAGGACCAATATAAGTAGAGGCAAAAGCATAGTATTGTCTGATTCTATGGGGATA  
CGTTGAAGTGTCTTTTATTTTCAAATAAATCCTACAGGAGCGTATCAGATTTCTTACATT  
TCCGTTCACTTTTGTATATCTTCTCGAAAAAAGGAAACCTTTTCATTATTATTCATTGT  
TGATAAAAAACAAATTTCTGTAACTGGTTTGGTTCCTTCTTTCCCCATATAGATATTGA  
ATAGAACGAGCTATTTTGTGTCCTGTAATTTTGAAATGAGCATGTAATGACCATC  
AAAAGTAAGTAATACATCCGAAACATATAAATGCAGTTAACCCCGCGAGAAACAAGC  
TATTATCGCGAAAATAGGTGAATACAACCACTATCATTAGAATTTTCATCTTTAGACCA  
AAAACAAGCAAGAGGTGGAATTTCCACAAAGAGAAAGTGACCTAATAAAAAAGTATTTT  
TGTAATTGGCACATATTTTGTAAACCACCCATAAGAACCATGTTCTGACTTTTATCTGG  
AGAATATCCAACAATGGGTTCCATTGAATGAATAATTGATCCGGATCCTAAAAACAATA  
TGCTTTTGAATAGGCATGAGTGATCAATGGAATAAAGCAGCTCGATAAGAGCCTATCCC  
TGGGGCTAACATAATATAACCAATTGAGACATTGTAGAATAGGCTAACTTCTCTTAAT  
GTCTCTTTGAGCAAGAGCTAAAGTAGCTCCTAATAGTACCGTTATTACACCTATCAAAGA  
AATGAGATTCAATTATGTAAGGTATGACTGTGAAAAGCGGAAGAAATCGAGCGACAAGAAA  
AATGCCTGCTGCTACCATAGTAGCAGCATGGATAAGAGCTGAAATAGGAGTAGGCCCTC  
CATGGCATCAGGTAACCATACATGAAGGGGAATTTGTGCGGATTTAGCAACTGCACCGAC  
GAATAATAGGGAGGCACACAGAGTAGCAATAAAGAGTTGACCCCATTTATACGGATCAG  
GTTATTGAAGATTTTGAACAAATCTCGAAATTCGAACTCCCTGTTATCCAATAAAAAACC  
TAAGATTCCCTAATAATAACCCAAAATCCCTACACGATTAGTTACAACGCTTTTGTACA  
AGCATTTCGCGCAGCCGGTCTGTGAACCAAAACCTATTAATAAATACGAACACATTCC  
CACTAGTTCCCAAAAAATATGAATTTGTATCAAATTGGAAGTGTAACTAATCCCAACAT  
GGAAGTATTTGAAAAACTCATATAAGCAAAAAATCTCAAATATCCTTGATCATGAGACAT  
ATAATTGTCACTATAAATAAGAACCATGATTCCAACCGTAGTGATTAGTATTGACATAAT  
AGAAGTAAGTGGATCGATCAAGTAGCCGAATCTAAGGAAAAATCGGTATTGATGGTCCA  
AGACCATAGATGTTGATAGATAGAAGTCCATTATCTGTTGAATAGACAGATCGGACGA  
AAAAACCATAACTATACTTAGCAATGAAACACTAGGAAAAGTCCACATACGACGCAGATT  
TTTTGTTGCGGTGCGAACAAGCAGAAAGTCCCAACCTTATTGACATAGTAAGTGAAGTAG  
AGCGAAAGGTATGATCCATGCATATTGATATGTATGTTCCATAAGAAAATAAACTTTCT  
TTTTTTATTCTTATTAATTGTTTCCCATTCACGAGCCCTATTCTTCCGGAAGGAGCAA  
TAATCAATAAATAAAAAAAATCAAGATATACAAGATATAAAAGAACTCAAATATGAT  
TTTTCACTCTTAATTATTCTGATTCTTTCCAACTATTGAAAAAAAACAAAAA  
ATTCAAATAATCAAGTTACTAGTTAAAAGCTACTACCTAGTTATTAACGAAGATATTTAT  
TAAGATAAAAAATACGAGATTTTCAATTATTCTACTATATACATACGATACGGTGATTTC  
TATCCATATTTATATCAATATAGTAAGGAAAAAGAATGATACCCAAATTTCAAGTACTTT  
ATTCTGATATGTATCGTAGGATCTGCCAATAACTCGATCCAATAAACCTAGTTTTTTTTT  
AGTTTCTTCGGAGTCATTAACATAAAACAAATCTGGAATTGATTGGCTTCTAGTCCAATA  
AAACAACTTATGTTTATGTGTTTATGAAAAATGCTAGAATACCTGTCACTTCGCATAGA  
ACTAAAAAGAGAAATTAATCAATTCCTTTTATTTTATCAAGTAATGTATTGTTTAACGG  
ATTAACACTTTTATGATTTAATTTCAATTTAAATTTATGTGGACTCTATCTCCGAGCTTGAT  
CAATTAATAGAAAAAGGTTACATTTCAATTATTGGTTTCTTAATTAAGGAAGGTTCTTAA  
GCTTTTTCGATTTATTAATAAATAACATTTATAATATATAGATATATTATCTAAATAGACTG  
AGATATGAATTGGACCCTTTTTAATTCTTATCAATGGCATCCGATTCAACGGTAGTAGAT  
CCCGCCCGTAGACATAGATTGAATAAGATATGAAGCCCCAATCAGTACAAATTATCTCT  
TTCTTCGAACATTGGATGTAATGGAATGTGAAAAAAAATTTCCCTTGAAATCA  
CATCGTTTTTTCTTTTCTTCTATTTCAATTTCTTTTTTTATCCTTAATGATACCATATG  
CGATGCTGATCTATCTGTATCCATACTCTCTATGTTATGAAGTAAGCATAAGTATCGGC  
TATGGAATAAAGATAGATAATGAATAGTTAATAGAAAGAACAATCTATTTTGAATTGAAC  
AATAAATGTCTTTACAGTCCAACATATAAAATGAGTGACCCTTTTATTTTGAATGGCGG

TTCCAAAGAAACGTACTTCTCTGTCAAAAAAGCATATTCGTAGAAATATTTGGAAAGGAA  
GGGGATATCAGGCCGCGGCCAAAAGCTTTATCTTTAGCTAAATCTATTTCTACCGGGCATT  
CAAAAAGTTTTTTGTGCGACAAACAAGTAATAAAGCCTTGGAAATGATCTGAATCTGCAT  
CAGCATGACTCGATGAATTGGATGATTAAATTTATAAGATGAAGAAATCACAATTAATAA  
TGTTTTGAACTCATCAATATGAGATAGAAGTAGCTGTTGTGGTATGTAGAATATGAAGTA  
TTCTGTATACTAGGTTCTAAAAATGATTCTTTTTTTGTTGAAAAAAGAAA  
GAAAAAGAGTAGTTAGACACAAAATACAAGGTTTCACCTTTTCATTGATTGGTTTTATA  
ATTCGCGAGATGGGGATTGTAACCTTTCCCATCGATTCAATTTTTCACAATAACAAAATC  
TTACTTTTTTTCTTAGGAAGGATTGCCTTATTGGATTATGTATCTCCAATAGTTATACA  
TCATTAAGATTTTTGGAAAAATCTGAAACAAGTATGAACGAGGTAGAGCCCCCTTTTTTG  
TTCCAAAGTAAGGCGGGGTAAAGATTTCATAGTCAAAGTCAATGGATTATTGAACTAATT  
GATTAAAAATATACATTTTAAACTTTTGATTGTAGCTCTCTGAATCCTACATATCTACA  
AGGACTCCCTCTGTTTTCGAACAGATAAAAAAACAACAAAATAATAAACTGCCAG  
GATCCCATTTAGATCGATATTTATGTACTAAATAATGAGTCAATCTTACGTTACGTAATC  
CAACCCCAATGGATCCTATCCCATGTTTGAGCTGGAGGATCGATCAATCGATATATCTAG  
ATCCAATATCTAAATTATTTATCTATTAATATTAGATTTCAAATCTATATATAAAGAGA  
TCTTATCAGTTTAAATTTGATTTTCTAAGTTTTCTAAGTTAAAGTACATACAGTAGAATT  
CCGATAAGAGATTGAACTCTTTTGTTATACGATATGCCCGGTCCAATACCTAATGGGTTT  
GGTAAATCCTCACACAAATTATGTTCTGTATACAATGAAGATCCCAATCATTAATACATC  
TTTGATACCAAACTATCCAAATTTTCATAGAAATCCTTTGGATGTAGTGATGAAGTTGTG  
ATATATAAAAAATCTTGTTTTATTTGTTTCATTGAAAAATGAATCTTTTTCATTTCCGAT  
CTATCAAATCAGATAAATGAGAAATGAATCGTCAAAAAATGAGAAAAAATCTTAGTTC  
TATACCTGGACTCAGGGCATAAACCCTAGTTCCAACCTATTCCAGAAGAACTATAATAC  
GGAAAAGCCCGCTGTTTAAAAGGACCCCTGCCACGATACTAAGGATTATTGAGCGTTTA  
AATATTTATTTGAACGGTCTTTATTCATCGATTCTAACATTTCTCAAAATAGATTGCAT  
TAAATCCCTCAATCTCGACGATTGAACATCATATGGACTATGATTATTTTCGATGATGCCG  
CCATGGTGAAATTGGTAGACACGCTGCTCTTAGGAAGCAGTGCTAGAGCATCTCGGTTTCG  
AGTCCGAGTGGCGGCATCCTCTAAAAAAGGCACAATAGATCCTATAATGAATTCATTC  
GGATTTCCATTCCGTAATTGGGGATACCCCCCTAAAAAAATATGATATTTGCCACTTT  
AGAACATATATTAACCTCACATCTCTTTTCTATCATTTCATTTGTTATTACGATTCAATTT  
GATGACCTTATTAATCCATGAAACCCGAGTACTATTTGATTGTCAGAAAAAGCCATGAT  
GGCTACCTTTTTCTGTATAACAGGATTATTAGTTACTCGTTGGATTATTTCGAGACATTT  
GCCGTTAAGCGATTTATATGAATCTTTACTGTTTCTTTTCATGGAGTTTCTCCATTATTCA  
TATGTTTTCCTAAAAGACCGAACCAGAAAAAGTTATTTAAGCGCAATAACCGCGCCAAGTGC  
TATTTTACCACAGGCTTTGCCACTTCGGGTCTTTCAACCGAAATGCATCAATCTGCAAT  
ATTAGTACCTGCTCTACAATCCAGTGGTTAATGATGCACGTAAGTATGATGTTATTGAG  
TTATGACGCTCTTTTATGTGGATCGTTATTATCCATAGCTCTTTTAGTCATTACATTTTCG  
AAAAAACCTAGATATTCCTCGCAAAAGCAATCATTTATTAATGGGTCATTTTCCTTTGT  
GAATGAAAAAAGAACGCTTTTACAAAACACTTCTTTTCTTTTATTTAGAAATTATCACAG  
GTATCAATTAACCAACAATTAGATCAGTGTAGTTATCGTGTCAATAGTCTAGGGTTTAC  
TTTTTTAACCATAGGTATTCTTTTCGGGAGCAGTATGGGCTAATGAGGCATGGGGTCTTA  
TTGGAATTGGGACCCCAAGGAAACTTGGGCATTTATTACTTGGACCATATTTCGCGATTTA  
TTTACACAGTAGAACAATCAGAGCTTTACAGGTGTGGATTTCGGCAATTGTGGCTTCTAT  
AGGATTTCTTATAATTTGGATATGCTATTTTGGGGTCAATCTATTAGGAATAGGACTACA  
TAGTTATGGTTCAATTCACATTAAACAATAATTGAAGAAAGGGCTGAAGAATACATAGGA  
ACATCGTCCCGTATATTTATATAAAGAAGGTTTATGCAAGTTTTTTCGAACCATTTGAATC  
AAGTAGTGATTCAAATGGTTTCGAAAAAATTTAGATGTATCTGATTATAATCACTTCAT  
TTTTTTTTTCTTTTCATTGAACGCTTTTAAAAATCACACAGTTCTTTTACATTAATGTAAT  
GTCTTATTGATGAAAATATTTATGAAAATAAATAGATAGAATAGCTTCTATCCTGTCAA  
TTGATAGCGAGAGAACGAAATCAGGATAAATACCAATACCTATTACAGGTAGAAGGATAC  
AGACCGAAACAATAGTTCTCGTGGTCCAGAATCAAAAAAATAAGAGTTTGGAAAGCTTGA  
ATAGCTTGTAGCCATAGAACATCCGACGTGACATAGATAATGAATAAATAGGAGTTAATA  
TCATTCCAATTGGCATTACGAAAGTTATTAGTATTTTGGCATTAAAGATATTTTGGGC  
TAGTAATTATTTCAAAAAATACTACTGATTCCGCAACAAAACCACTCATTCCTGGCAATG  
CAAGAGAAAGCCATCGAGAAGCTACTGAACATGGTAAATATTTTGGCATTGGGATAGCTA  
TTCTCTCCCATTTTCGTGAGATAAACAAGACGTATTTCTATCGTAGCTCGTTCTGCCAGA  
AAAAAAGTGCAGCACCAATAAATCCATGAGAGATTATTTGTAAGTGGCTCCATTGATTC  
CCGTATCCGTTTATGGAAACCAATCCCTATAAGTGTGAAACCCATATGAGATACGGAAGAAT  
AGGCTATTCTCTTTTTTAAATTGCGTTGACCGAAAGAAGTTGAAGCTGCATAGATTATTT  
GAATCGTCTCTACTATCATCAACCAGGGAGAAAATATAGAATGAGCATGGGGTAATAATT  
CCATATTGATCCGAACCAATCCATACGCTCCCATTTTAAATAAGATTCCCGCTAGAAGCA  
TACATGTACTGTAATGTGCTTCTCCATGGGTATCTGGTAACCATGTATGTAGGGGTATAA  
TCGGCGATTTGACAGCATAAGCAATAAGGAAGCCAATATAGAATATTATTTCCAATCCCA  
AAGGATACGATTGATTAGCTAATGTTTCAAAATTTAATGTTGGCTCATTTGGAGCCATATA  
AACCCATACCCGGAACCTCCATTAAGAGAAAAATAGAACCCCGCTGTGTACAAAATAA  
ACTTTGTAGCTGAGTACAGACGTTTCTTCCCTCCCATATGGATACAAGTAGGTAAACAG

GAATTAATTCTAATTCACATGAGGAAAAAAGTAAAAGGTCTCGAGAGGAAATGATC  
CTATTTGACCACATACATTTGCTAACATCAGGAAATGGAACATCGGGAATCTCTAGTAA  
CTGGCCGAGCCGCTAAAGTAGCTAAAGTAGTGATGAATCCCGTCAGTAAAATGGGTCTA  
TGGAAAGTCCATCGATTTCCCGTCTCCAGTGAAATCAAAAGTATTTATCCATTTATAAG  
CCTCTTCTAATTGGATTAATGGATCGTCCAATTGGAATGATAACAGAACGCATAGGTCG  
TTAGAAGGAGTTCTAATAAGCATATACAAATAGTATACCACCGAACCCCTTATTTTTAT  
TCCTCTACGAGGGAGAAAGAAATTGACGAACCCGCGGATATCGGCAAAACAACAATTA  
TTGTTAACCAAGGAAAAATAACTCGTGGTAAAGACAAGATAGACTTTGACCAGAAAAACCC  
CGCTCGGAATAATTTCTCGAGTACGGGTTTTTGTCTCGGTAAGAGGAATCAAATGGATTC  
AAGTGGATTTTTCTAGAACGTATCAATAAGCTAGACCCATGCTGCGAGTTGTCTCATGCC  
ATAAGTAAACCCGAACACTCAAGAAATCCGTTGGACAAGCGGATTACATCTCTTACAAC  
CTACACAGTCCTCTGTTCTTGGAGCAGAAAGCAATTTGTTTAGCTTTACATCCGTCCTAAG  
GTATCATTTCCAATACATCTGTGGGGCAGGCTCGTACACATTGAGTACACCCATACATG  
TATCATAAATCTTTACTGAATGCGACATTGGATCTATAAATTTTTTGAACCTTATGAATT  
TTCGATCTGGCTTCATATTAGTAATTGAATTATATATATATATGTTGTAGACGCCAGACGAAT  
CAGTGGTTTACCAGAACCTTTTTTGATAATCAATCTATTTCTGGATCTGTTTATGAGCAAG  
GGCCAAGATACTTTGATTTCCTACGTTTCAACAAGCATGGTCATACGAATCATACATGCT  
AGTTCTAAATTAGTGAATATTTTGTGGATATCTGTCTTTATTTATATCATTAATACATT  
TATTCAACAAATTCGATTGATTGATACGAGTTGATTTTCTGTTACGATGGATCGATGAAA  
CAATAGCCGGCCCAATTAGTATGCTTGCAGCGCTGCAATAGCTATAACAAAAATCGAGAAAA  
TATCTCCTTTTAAATTGACGACTATCAACAAATCAGAAAAATGTACGAGATTTATATTAA  
CCGCATTCAGTATAAGTTCAAGACACATAAGTGCTCTAACCATGTTTCGACTTGTGATCA  
ATCCATAAATACCGATAGAAAAATAAATAGGCACTCAAAATAAGTACATGTTCCGGTCATCA  
TTGACCAACCCCTCATCAATTTTGATTCAATTAATGAACAACAATTTACCGATTTT  
ATTAGAATATAAATGAAGTACGAAACAAAGTAAGGTATTAGTAATGGATCGAACTAAACC  
CCTTTCATTTTATATATGAACAATAGAAATATGAAAAATGGAACCTGAAGGAAATGGATGT  
GATAACATAGAACAAAAACAAGACTTTATTTATTTTATTTGATTTTGGATCTAAGTATTTA  
TTACTTAAATTACTTTACGCGGCCATAGCAATTGCACCTATCAAAGCACTAAAAGAA  
TTATAGAAATGAGTTCAATGGAAGGTAATAATCTGTTGATAAATGAATCCCAATTTGTT  
GAACGTTACTTGTAGGTCTGTTCTATAATCTGATTTGATCTGTAGTCCAAACAATCC  
CGTACCAGCAGCTATCCGAGATAGTAGTAATTAGTGAAAAAAGAATACTTGTACAAACCA  
GTGAAGTGACCCCATCCCAACGGTCCAAAGATAGAAATCTTGTAAATATTCTGAACCAT  
TCATGAACATCACAGCAATAGGATTAAAACATTTACAGCTCCTACGTAAATAAGGAGCT  
GTGCAGCAGCTACAAAAATAGGAGTTAGATGGAATATGGAATAAGGATATACAAACAAGAA  
CCAGTCCCAATGAAAAAGCAGAAATAAATGGGTTGGTAAGTAAGACCACCCCCAGACCCC  
CTAATATAAGACCTGATCCAGAAATACTAAAAGAATATCATGTATTGGTCCAGGTAAT  
CCATTATGTGTAATAAAGAGATAAATAAATCGAAATATTTTATAAACTTACTAACCGAC  
CCAAGAAAAAAGAGGTTACCTTATTTTTTTCTTGTATATGATACGTTCTAATTGAATCC  
TAAAGGGGTGTAGATTTTATATAGATACAGTTATGGATCAATCCCGCTACTGTATCTGAA  
AGAGTAGTTGCAAAATGTATATTTTGAATCATCACAGATCTATGAATCCATTCTAAATC  
AAAATCAAGCCTTGATTCTCACCAATCAATAGTTATTTACTGACCTAGCAAAATGAAAGA  
AGCCTCACTCCTTTACTTTAATCAAAACGGAATCTTAGTAATTGGTAATCGTTTTTGA  
TCAAGAGGTTTACCCCTGATTATTTTATTGGAGTCAATTCGTAATTGTTTCAATTTGTG  
TAATCTCCAATTACTGACATTGGTAACCGGCCAAAGCAATTTGATTATAATTCAATTG  
TGACGATCATAAGTAGAAAGTTCATATCTTCAGTCATTGATAAACAGTTTGTGGACAA  
TACTCGACACAATTACCACAAAAATACAGATTCCAAAATCAATACTATAATTAAGCAAT  
CGTTTCTTTCTAATATCCGTTTCCAATCTCCAATGAACAACGGGTAGATCTATGGGGCAT  
ACCCGAACACATACCTTACAAGCAATGCATTTATCAAAATCAAATGGATTGACACGCA  
AAACGCTCCGATGTGATCGACTTTTCATAAGGATATTGAATAGTCACAGGTAAACGATTC  
ACGTGAGATAAGGTAATCATGAACTTTGACCAATATACCTTGCAGCTCGTATTGTCTGT  
TGACCATAAATTCATGAACCCAGTCACCATAGGGAACATATCGTGGATATCCATGAATAGT  
TTGATGTTTCTTCTCTGCTCTAGATAGGTTATGAATCTAGAATATCATATTTTGTAT  
AGCGAAACGAGTTGGGAAGAAGTTGTTAATAATAGATTACCTAGAGAAATAGGTAAGA  
AATTTCCACCCAAAGGTTAATAGCTGGTCCATTCTCATCCTAGGTAAAGTCCATCTTGTT  
GTGATAGGAATGAACAGGAACAAATAAGCTTTAGCTAATGTAATAAGGATACCAATTGTC  
ATTCCAAGACTCCACCTGTTTTATTTATTTCCAAAAGGTTTCAAAATGAATATGTACGGA  
ATAGAGAAATTCACCCGCCCAAGTAAGAAGTGTACAAATAATGAAGAACTAGTAGA  
TTTAGGTAAGAAGCAACGTAAAAATAAACAGATTAAATACCTGAATATTCGGTTTGATAA  
CCTGCTACTAATTCCTCTCTGCTTCTGGTAATCAAAAGTAATCTTTCACATTCGCT  
AGGGAAGAAATTAGAAAAACTATAAACCTATAGGTTGACGCCACAGATTCACCCCCAA  
AACCCATATTTTGACTGTGCCTCAACTATATCAACTGTACTTGAAGTGTAGATAATCAT  
AGTCGATGATAACATCACTATTTCCATCGCTATTCAGAACCCGACATGAGACCTCAGCT  
TCATACGGCTCCTCGATGGCCACAAATAAATCTAAGGACTGGTTCATTATTACCTCGCA  
TGTTTGTAGTGTAGATTAGAGTAAAGATGTATCGAAGAGTCCCGAATTAGACCAATGGAA  
TTCCGTCGCCATAATAAAAAAAGCGCTTCCGAATTGATCTCATCTTTA  
TTTTCTAATTAGACTTAGAATTTCTTTTGTAGTCAATAACTTAATCCTTCAATAAATA

CTCGTTGTTTCAATAGATATTTTCGACCCATACTTTTCGTACGAAAAAGAATTAGACACTA  
ATTCATGAGTTTATAGTTGATAAATCATTATAAGAATTCTATCCGAATAAATATGGATAGG  
ATTGAGGAAAGAAAGAATAAACAAAGATCTCTTATTATTAGTTTTCCTATTGCATTCCA  
TTTCTTTTCGTTCTCTGTTCTTCTTCTCACTCAGAAGGGGTTTCTAAAAAATCAAATCAA  
AGGATTACTTCGTTCTCGACAGTCATTTATTTAATCAGTGGATAGAAGCATACTCTGGAT  
CGGAATCGTGAGGAAGTACTGCTTGATCATTTCTACGAACTTAAAGCCCTCATATGATT  
CCTTTTATGTTATGCAGAAATATCCCTTTGGATACCTTACATTATCTTCATCACTAATCC  
TTTGTGTACCTTTGTGTTCTTAACCGTCCACTCATTTTTGATTGATCCCCGGTATGGTAA  
TACATACAACATACACAACATACAACATACTATACAATAGTGGAACCTCCATACAGT  
TGATCTTTTGCACCCGCTTCAAGTCATGATGACTAATCAACCAATCTTGGGGTAAACAGT  
TTCGACCGCTTATGTTTACTTCCACTTTACTCTCGTACATAGGGAATGAGAATCAATCTT  
CTTACTGCAAATTCATAAGCTGTTTTGTTTCACTCATATAACTATCTGGTTTAACTCATC  
GACCCGAATGATGAATAAAAAGAGAAAGGTATCTATTAACACATCCAACCCCTTTCCTG  
GAAATAAAGGAAAGGGGTAAAGGTTTCATGTTCCAACGAATCACACGTAGAGATATTGATA  
ACACACACGGAGTTAATGGTATTTTCATAACTAATAGATTGAGCAGCAGCTCGTAGACCAC  
CTGAAAAGGAATATTTATTATTCGATCCATATCCTGACATAAGAAGTCCAATAGGAGCAA  
TACTGGAAATAGCGATCCATAAAAAACGCCTATACTGAGATCGGCTAGAACAAGGCGAT  
AGCCAAAGGAATTACTAAATAGCTTAGTAGAATTGATATGACCGCTATAGATGGCCCCA  
TACTGAATAAACGAACATCTCCTCTAGATGGGAGAAGATCCTCTTTCAAAGTAGTTTGG  
TCCCATCTGCTAGAGCTTGAAGAATTCCCAAGGGGCCGCATATTCAGGCCGATACGTT  
GTTGTATCCCTGCAGATATTTCTCTTCTAACCACACAATCACGAGTACGCCTATTGTGA  
TTCCCGATACAGGAGTAAAAATAGGGACAAGCAGCCATAAGAGGTCATAGACCTCTTTTA  
AGGATTCCGATCTGGAAAAAGAATTGATAGCTTGTACTTCTGTCGTATCAATATCATTT  
CAACGATCAACTTCTCCCATATGATATCTATACTACCTAGTATCGTCATGATATCCGCC  
AATTTCAATCTTTTAACTAGCTGAGGAAGAATTGCAAATTGATGAAACAGGTGGACGA  
ATTTTCCATCTCCAGGGAATAACACTATTATCCCTATCAGAAAAATTCCAATTCTCCC  
TTTGGGGCTTCGACTCTCACATAAAGTTCTTGTTCGACAATTCAAAGTGGGAGAAGGC  
TTTTTACTAATGAATCGATATTCAAACCATTCATTTCGGAATCACTTGCTCTATCAAAG  
CGTCGAACCTTCAAGTTCATAGGGCCCCCGGAATTCTTCTAGAGCCTGTTGAATA  
ATTTTTATGGATTCCGTCATTTTCATTGATTTCGTAATAACGAGCTAATGAGTCTCCT  
TCTTTTTGGCACTGGACTTCCCAATCGAATTTCATCGTAACACTCATATGATCAACTTTA  
CGAAGATCCCATTGGATTCCGGAAGCTCGTAGCATTGGTCCCGATAAACCCCAATTTATT  
GCTTCTCCCCACCAATAATGCCACCCCTTCAACTCGTTCCAAAAAATGGGATTTTGC  
GTAATAAGCTTTTGATATTCAACAATTCTGTAAAGAATAATCGCAGAAATCCAAACAT  
TTATCTATCCAGCCATGAGGTAGATCAGCAGCGACTCCCCGATACGGAAATAATTATGC  
ATCATTTCGATACCTGTGGCAGCTTCGAATAGGTCATATAGCAATTCCCTTTCTCTGAAA  
ATATAGAGAAGAGGAGTCTGTGAACCGATATCTGCCATAAAAGGTCCAAGCCATAATAAA  
TGAGAAGCTATACGACTCAGCTCCAGCATAATTACTCTGATATAGCTGGCTCTTTGGGT  
ACTTGAATATTTTCTAATTGTTCTGGTGCATTTACCGTTATTGCCTCTGTGAACATAGTA  
GCTAAATAATCCCAACGTGTTACATAAGGAAGATATTGTATAATTGTTTCGGTTTTCGCCA  
ATTTTTTCCATCCCTCTGTGTAATAACCCAATACGGGTTTCGAGTCAATAACATCTTCA  
CCATCTAGAGTAACGATAAGTTCGAAGAACACCATGCATTGATGGGTGGTGAGGACCATA  
TTAACTATCATGAGGTCTTTTCTGTAGCCGGTACATTCATATGTTTTCTTCTCCGATCC  
ATTATTCTATGAATTGCCGAAAAGGAAATAAATGAGGTTTCATCAAATTCAGATCTAAT  
AAACCAAGAATTCAAATAATCTTCAATTAACGAGTTTTTGGTTCCCGAATATCTAATT  
GATCGATTAATTTTTTATAACGCACTCTATTTTTCTTTGACAAATAAGCCAGCAGTCGTT  
GACGTTTTTCCGAAATTTCCGCAACCTATCTGAGATAAATAATCTTTCTGTGCAATT  
CAAAATGTGAAGTAAGTCTCTGTATCTTATTGGTGAAGTCTTACTTGAAATTCAACAG  
ACCCTTTGTTTTTTCTTCTTTCCGAATAACTGAGATGAATGAATTTTTTACCATAACCA  
TAAAAATAAATTTCTCTCTTTTTTTTTTTTTTCCACAGATATGGATTTTACCAATC  
AGGAATAATAAATGCCAGTTATTTTGATCTGATACACCAATAATCTGGATTTATTCA  
TATATTACTTTATCTATATTCTATCAAATCAAATCAAATTAATTCAAATGAATTGTA  
AGTACAATTTGTAATTTGATTTCGATAGAAGGGCAATTTTGTACCCACAAAAGAAAAATTA  
TTTTGACCTAAGAAGATTCTGCCAAATCATTCTAGATTCAATCCAAATCCGACACCTGA  
TATATAGGAAATGTACCAACCATCACTAATTCGGAATCGTGGATACATATGTATCCTTG  
ACATACTGAAACGGCTGCCATTATTGGTATCAAACAGTAGCGATTATACAGCTAAAT  
CCTCTAATCGATAATTGGGCCAAAGAAACAATTTGAATTGAATGAATTTATTTATATCTG  
TATCAATATGCTTGTCTCTCATCCCAAAATTTGTCACAGTTCCCTTACATTGTTGTCTGTA  
AAAATACCGGATTCTATCCATAGCATTCCTATTTCCGGAATTGAAACAAATTAGAATTC  
TCAATTCTCTACGACGCTAGGGGATAGAATATTTTCAGGAACAAGCAATCATAATGAT  
TTTCGTCTCTATTCACAGCATCTTTTATGTTGTACAATGGATCCATTGAAATAATTCT  
CATCGACATATCTTTTTCTAGATATCTTCCATTAGTTGGCATTTATTTATATGGACCA  
GTGAGATACCTATGGTTTGATACATAATAAATTGCTCTATCCATTTTATAGACAGCGTA  
CTGGTTCAAGAAATCAATATCCCTTTTTTATCAATTCTGGAAGAGTTGGATTCTGCTGAA  
TTAACATTACATCCAGGTGCATTTCTCCTCCTGAATAGAGGATATAGCAATTTCTTTG  
CATTTATTAGTCTAAGCAGGAACAATATACCTTAACATTATTGAAAATCTGTTATTCA

AAAGATCATCCCATCTCAATTGAAAAAGCAAATATTTTTTCAGGAATAACTCTGTGTTTG  
CTTTCTTGTTACTCTCGGGTTGTCCTTTCTTTTCACGTTTTTGAATGTCCGATTCCCGTG  
AATCCTTTTCAAAATCTTTTGTGCGTTTTCGTGCCTCTGAGCCAATATTTCCGTGGCCGA  
GCTGTTCTTTTCTTCTGATTCTGATTCGATTCCTTTAATTCAGATATTCTTTTGTATTAGATG  
ATATACGAAGATCCTTTTTTTGATTTTCATTAATGTTTTTGTTTTCTACTAATGTTTTCAT  
TTCCATTAAAAATCAAAAGAAGTAATTTTATTGGTATAATCCACGGTTGATCTTATATG  
CATCATAAAGTGGCACAAATTCGAGAGAACCAGATTTTCGTATTTAATATGGGGCGAT  
ATAGCATTCTTTATTCATTCATCCCATCAAAAAAACTTTTTTTTTTGATTGGGTGGGTGTA  
TTTCTTGATGAATCGTGAGATAGAAAAGATCTTCTTATCAATCATTTGATAATAATCAG  
TCTCGGTCTTAGTCATTTTATTAATGTTGGTCCCGGTATCCGTATCGGTCCAGGACTCAA  
TATCGATATTCTTTCTAAGAAATAAATCGAAAATTTTCCACTCCAAATATTTTCTATCCG  
TAGTTTTACCCGTACCATAATAGACTCTTCTCCTAGATAATCACTAATACATATATCCC  
CCAGTACATAAAATGGTCAATTTTAGGTGTGTGTAATTATATGGAATCTCTCGGTCCCT  
CGTTTACTTGTAATGAGGATGGATAAATATATGAGTCTTTCCTATCCCCATAATTAATAT  
ATTTATATGAAAAAGATCATATCTGTAGTTTTTTTTTAATTTTGCTTTTTTATCATCA  
ATGAATTCACCTTCATAATCATTTTTTTCTCGTAATGAATGAATTGGGCTTTTTCATATG  
AATCTTTTTTGTAGTCTTTATTTTGAATCGTACGACGTGATTGACCCTAGTTCGCCATT  
TTTGCGGTACTAATTTAGACCACCTAGCCTGAGATAAATTGTATTGATAATGACCCCTTA  
ACCAGTTTTTCCACTCATTCCAGAAATTCGGAAGTTTTTATGCCTTGATTGGAAT  
CTAATATTCTTCGTGTTCCAAAAAATTCGGATTCTATCCCTAAGAAATAAGATATGCTT  
CGCGATATTGAAGTAGAGATCTCAAATGATACTTCTTATTAATAGCTTGGAATTGTGATA  
ATTTGTAAATACAGATGCTTGTGAAAAGGAATATAGGTCACCAGAAATCTTTGATTTAT  
TTTACTAATATTAGAAATAGACTTTTTTATAGTCGAAATAAAGTGCATTTTTTTTTGAT  
TTATTTTCATCAATCCCTTCTTTGTGAATGTATTTATCGATAATCTTTTTTGTTGATTTAA  
GGAAAAGTTGTACGTTGACTCTAGAAACATTAACAGTATATAGAAAGATATGTATGTATA  
TTCTTTCCGTCGAGAAATGCAAAAAATAGTGCCATTTGCGTATGAATATGAATCTGTAC  
TTTTTCTTTTGTATATCTGCCAAATATGTTTCTGCGATTCTGATCTTTTATCACCACAAC  
TTGTATCGTTAGGACTAATATTATATCCGGAGTTAGAAATATTTTTCTTTGTCTTTTG  
CACCCCTTCTATTTGATTTCTGATTAGGGTTGTTCTATCGGACAGATCTTTCTTTTTTT  
TTTCTGTCAGTGAATAATTTGCCCAATCCATGAATCTAATTCGAATGGTCGATGTCGATT  
TAGGAACAATTTTATTACTGCTTATGATTATGAATCTTTTCCATTTCATTGCGTTTCT  
ATACTTTCTTCAATACAAATAAGAAAATTTGGATTTACGTTTGCAAACCTTTTTATTTTTC  
TTTTTAAAAATAGAATCGTTTGTATAATCCATCTTGTTTTTCTTTTGAGACCTTTCTAA  
ACTGTTTTGTTTTTTTTTTGAAAACCTCTAGAACTAGAAAACATTTTTTTTTTCACTTTTA  
TCTTTTTTTTTTTCGAATTCATTATAAATAGGTTCAAAAAAGGAAGTTGTTGTCGGGCAG  
AACCAAAAGGTAGTTCGGTTTCCCTTTCCCGAGATTGTTAAAAACAAAAATTTCTGTTT  
TCCCTTCTTTTTGGATTGGATCTCTATGATGGGATCGTAGTTGGATTGCGCCAGGGTT  
TCAGACAGAAAGGAAATAGGATTTTATCTGAATACCATCTGTTAACCAAGTTTTCGGAA  
ATTCTGTTTCTGATAATTGAACACCATTATAGGTGCATTTAACATGCATTTCTCTATTCC  
ACTCCTTCAAATCCTCGTACCCTCGGGGAATTGAAAATAAGAGCATACGGCCGAGGTTTT  
TAGCTATTATCAATGAAGGCAATATGATGTATTTTCTAAGAATCGATTGGGTTACTAACA  
TAGTACCTCTTATTGCTTGAGCAAAATATAAAAGTATCCCATGCTTCTGCTATTGCTATCC  
GTTCAATCTCGTTTTTTTTTATCTTCAATTTTTTTTGCCCTCTTCTTTGCTCTTCTCCT  
CAGAATCCGAAGTTTTGAGTTTCGGTCTGTATCTATCCAATTTCTAAAAATTAGATTCA  
TTGTTTCGGGAGATATCAAAAGAAAAAAGTTTTGTCTATTCTGTCCAAAAAAGCA  
GGGAATGTGATTCGCTTGAAACATTTCCCAATAACCATTTTACGCTTTTGAGCGCGTA  
TGGATCCTTTTACTATATCCCGACGAAAATCTGATTGTTGCGAGTAACGTACCAAGGCCA  
ACTCTTCTGCTTGTACTACTATAGTACTGGTACTAGTATGAGTATTGGTATTCTGATCCG  
GATCCGCCTTATCAGTATAAATTACCACACGTTTGGCTTTTCTTGAACGAATCCCATGAT  
TTTCTGTTGATTCTTCTGATTCTTCTTCAATTTTCTCTCTCCCGCTCTCAAAAAGAAATGA  
TCAATTTGTATGATCGTCGAGGAATCTTTTTACCGATTCTTCTATTCCAATAGATTTAT  
TTTGAATTGTTTGATTATTTGATCAGTTGTAATTACATCGAATAGAAATTTCAAACATT  
TTTTTTTATTTTCTGAATCAAAATCTTCTTTGTTGCGGATATTAACACAGCTTTTGAAT  
TCAGACTAAAACCAAGTTGTTGATTTCTAGCTAATTCATGATAGAGGTCAAGAAAGGAC  
CAATGTCGTGCGATAATGGTTCTTCATTAAATGTATCCGTTTTATGTTCAAGTTTTTGGT  
AATCAGTAGGAAGCCTATCATGAATCTTATTTATCCAACCATTCCTATAGAATCTTCTG  
TCCCTATAGAATCTTCTGTCCCTATAGAATCTTCTGTGCAAGTGATTGAGTCATCCACCA  
TTGAACGTGAATACACTTTTTTTTATTGTTCCACGATATGGTCCGTTTAAAAAAGGATCAT  
ACACTCTAGGCAAGCATTCTTGGTTATTTTTATCTTCTTGGTTATTCTTATCTTCTTGGT  
TATCTTATCTTCTTGGTTATTCTTATCCTCTTGGTTATTTTTATCATATACAATCTGG  
TCCTTTTTTCAAGCACATCCATAGTAAGAGATCCCTTGTTTAGAACTCTATTCGGTTTA  
TGAATTCAATGCTCAAGCTGTACCTTTTTTGTTTCAATGGTATAAACCAATGATTATACA  
GATCTTCGGGGGATAGTTTTTCGGTCTGACACAAAGACATCTTCTTTGCATCATTTCCA  
AAAAAATCGATAAACTGGGTGGATATGTAAAAGATATATTTGTTTTTCCATCAACTGGAC  
ATACGTGAAAAAATATTGTGACATTTCAATTTCTTACAGCATTTTGAATAAATTTTTTT  
TTATATATCTCAATGGACGATTACATCGTTTATAGTCGAAAAGAAGATTCACAAGAGGTT

TTTCAAACCAGAAGAGGTCTTTATCTTCTTTCTCTTTAAGTATTTCTAACTTCAAATTT  
CTTGCCCTCTTTTTTTTTTCATGTAGTTTTTTTGGATCCTCCCTTTCTTCCGACAAAGGG  
AAGGGTCTTCTTCGGTGGATCCCTCTTGTTCTGTTTAGTCCCCTTCGTTTCGGAAGTTT  
TTTCTATTTCTACATCTGTTTCTTCTCTCACTTCCCCCTTTCTTCGGTTTTTGAGGTTT  
CTTTCAGTTTCTTAGTGACAATAGGCGACGGTATTCTGCCTAAATAGTAGACACAGGTGA  
TAAATAAGAGAATAGTAAAGATTCGAGCCATAGAATTTCTCAATTCTGACACAAGGTACT  
TATTAGATCGAATAAGTACATTCGATCTAATAGAATGATTTTGCCGTATCCAGAATAATA  
CCAATCCAACCCATTTTCATGAAGAAAATGTGACCAATTAACCAACCAACAAAACACTACTG  
TTACAAAATAACATCTTGTGTTGCATCGAAACATATAAATGTTGACTAATCTGACTAACG  
TTGAACCTGGTAAAAATGAAATGGTTGAATAATGAAAAATGAGATTATTTCAGGAATACAC  
ATTGAATGCTGAGATTACGCATTGAATTTCTGGTAGTAGATCCATAATCCAAAAAGTGTT  
TGTGATTGTTCCAGAAGAAATGAAACAAAAGATACGGTAGAACTAGGACAGTTATTGTAT  
GAGGTCTACCCCAATGCTAGATGCAGAGGCGCATAATAGATCGATATGAACATCATGAGCT  
GTCCCCTAATAAAACAGTTGTTGCTGATACCTCCTTCTCGGTTCTTCTCCATAATCC  
TAGCTCGGAGAAGGAAAAGATAAGAGGGCCCTATGGAGAATGTGGTCAGAAATCCATAAT  
AGAGTCCGACCACAACGACCGAATTTATTATCTTCATGCATAAGGATAATAGATTACCTA  
GTAGAAAAGATTTCAAAATCATCACAAACCTCCCTTTTTTCTTTTCTATTGCAATTTCTC  
GATTACTATATGATGATTCTTCACTTTCATAGATAGAAACAGATAGACTAGAAATGAC  
ATCTTTTATGTCAATGATACCCCTCTTCTTCGATTGAATGACATCTCTTATGTCAATGACA  
CCAAGGGATATTAAATGAATGGAATTGGGATATGGATGGAATATTGGGATATGGATGGA  
ATATAATGAAATAGAGCCACTTTGAGGTTCCCTATGAAATGAGGCATGGAACGGAGCCAC  
TACGAAGAAGTTCCGGGAGTTACGAAGGAAGCTTCGGGCTCATATTGGTCATGGGTTGAG  
AGCGGGAGTTGAACTCTATGAGATCGAATCTCCCGTTATTCTCAGTAGCTCAGTGGTAG  
AGCGGTTGGCTGTTAACTGACTGGTCGTAGGTTCAATCCTACTTGGGGAGATTTGATGA  
ATTCTTAATTAAAGAATTAGAAATTACAGAATTAAAGGGCTCGCTTTGACCGTTAGGAGT  
AGTAACCCGTTCCCTGTCTTTGTTTCTATTGCACTCTATCTCATCGCATTCTGTTCTGC  
GATATTGAGAATCACCGTCAATACCTCGGTGTAGATCCGGGATAATCCTTTGTTCCATA  
GCCTTGGGGCTATTTACAACCTAGCCAATTCATAATTCTCAGATGATGTACTAGCAGTGCA  
TCAAAGATGCAGTCATCGATTCTCCCGAGAGGCCACAATTACCGCGAGCAAACATATTAA  
TGACGAGGAACGCATTTTTGCTATGCTACTAATACTTGTATTGCTCTGCTATTCTTCCC  
AAGCCTGGCTGAGGAAGAGTTACGGGGAGTAAAACACAATAATGCTGATTTCGGGCCAGGC  
ATACTATATGTATCGATTTTTTCCCTTACGATAAAATAAAAAGAATAAGGCCATTTTCGACA  
AAAGACCCACACCCAGTTCCATAGCTTTGCGTCCGCTATCCCGATCATGATTTTCCCTAC  
CCCCAGAGGTAAGGAAGAGTCCCTTCCCTTTTGGGCCGGTTGTGGGCCAGGAGGGATTG  
AACCCCGACACCGTGGTTCTGATGCCACGTGCTCTAATCCTCTGAGCTACAGGCCCCACC  
CCGTCTCCACTGGATCTGTTCCCTGGAGTACCCTCAAAAAGGAACCTTTTCTCCCTCAG  
CCATTTCCGGTTAAGAAGACGTGAAAGCGCCTTTCTCTATAAGAACAGCGCGTTCCGA  
GGTGTGAAGTGGGAGAGAAGGGATGTCATAATTGGGTTTTGAATAAGACGACCTTTTCAT  
TTTTTTCTTTTTGAGTAATAAGAATAAGAGGTGTTAAGCTTTTTATCATCCTGGCGTCGA  
GCTATTTTTCCGAGGACCTCCCTACAGTATCGTCAACCGCAGTAGAGTTTAAACACCAA  
GTTCCGGGATGGATTGGTGTGGTTCTCTACGCCTAGGACACCAGAATATCGAACCATGA  
ACGAAGAAAGGTATGAGAGAAATATTGGCTAGTGATTGTGAAGCCCAATTTCTGACTGG  
AAGGGACACCAAAGGCCCTCTGCCCTTCCATCCCTGGATAGATAGAGAGGGAGGGCAGAG  
CTTTTGGTTTTTTTCATGTTGTCAAACAGTTGAACAATGAAAATAGATGGCGAGTGCCTGA  
TCGAATTGATCGGGTCATGTAGGAACAGGTTCAAATCTCTCGGTCTGTTAGGATGCCTC  
AGCTGCATACATCACTGCACTTCCGCTTGACACCTATCGTAATGATAAACGGCTCGTCTC  
GCCGTGACCTTATCTTGGATTCTCAAGACTTCTGTGCTCCATCCCCGAGGGGCAGAGA  
ACCCGTCGCTGTCTCGGTGTGCTACCGGAGGCTCTGGGAAGTCGGAATAGGAGAGCAC  
TCATCTTGGGGTGGGCTTACTACTTAGATGCTTTCAGCAGTTATCCGCTCCGCACTTGGC  
TACCCAGCGTTTACCCTGGGCACGATAACTGGTACACCAGAGGTGCGTCCATCCCGGTCC  
TCTCGTACTAGGGACAGGTCTCTCAATGCCCTAACGCCCACACCGGATATGGACCGAAC  
TGTCTCACGACGTTCTGAACCCAGCTCACGTACCGCTTAAATGGGCGAACAGCCCAACCC  
TTGGAACATACTACAGCCCCAGGTGGCGAAGAGCCGACATCGAGGTGCCAAACCTTCCCG  
TCGATGTGAACCTTGGGGAAGATCAGCCTGTTATCCCTAGAGTAACCTTTATCCGTTGA  
GCGACGGCCCTTCCACTCGACACCGTCGGATCCTAAGGCCGACTTTTCGTCCCTGCTCGA  
CGGGCGGGTCTTGCAGTCAAGCTCCCTTCTGCCTTTGCACTCGAGGGCCAATCTCCGTCC  
GGCCCCGAGGAACTTTTGACGCGCTCCGTTACCTTTTGGGAGGCCCTACGCCCCATAGAAA  
CTGTCTACCTGAGACTGTCCCTTGGCCCGTAGGTCCCTGACACAAGGTAGAATTCTAGCT  
CTTCCAGAGTGGTATCTCACTGATGGCTCGGGCCCCCCCCGGAAGGAGGCCCTTCTTCGCCC  
TCCACCTAAGCTGCGCAGGAAGGCCAAAGCCAATCCAGGGAACAGTAAAGCTTCATA  
GGGTCTTCTGTCCAGGTGCAGGTAGTCCGCATCTTCACAGACATGTCTATTTCACCGAG  
CCTCTCTCCGAGACAGTGCCAGATCGTTACGCCTTTTCGTGCGGGTCGGAACCTTACCCGA  
CAAGGAATTTTCGCTACCTTAGGACCGTTATAGTTACGGCCCGGTTACCGGGGCTTCGG  
TCGCCGGTCCCTGTATCAGGTACCAACTTCTTAACCTTCCGGCACTGGGCAGGCG  
TCAGCCCCCATACATGGTCTTACGACTTTGCGGAGACCTGTGTTTTTGGTAACAGTCGC  
CCGGGCCCTGGTCACTGCGACCTCCTTTGTGAGGAGGACCCCTTCTCCCGAAGTTACGGG

GCTATTTTGCCGAGTTCCTTAGAGAGAGTTGTCTCGTGCCCTAGGTATTCTCTACCTAC  
CCACCTGTGTCGGTTTCGGGTACAGGTACCCCTTTTGTTGAAGGTCCTTCGAGCTTTTCCT  
GGGAGTATGGCATGAGTTACTTCAGCGCCGTAGCGCCTGGTACTCGGACATTGGCTCGGG  
GCATTTCCCTCTACCCCTTCTTACCCTGCCCTAAAAAGCAAGGTGACCTTGCGTCCTTGA  
ACCGATAACCATCTTTTCGGCTAACCTAGCCTCCTCCGTACCTCGGGACCAACAAGGGGTA  
GTACAGGAATATTACCTGTTGTCCATCGACTACGCCTTTCGGCCTGATCTTAGGCCCTG  
ACTCACCTCCGTGGACGAACCTTGCGGAGGAACCCCTAGGTTTTCGGGGCATTGGATTC  
TCACCAATGTTTTCGCTTACTCAAGCCGACATTCTCGCTTCCGCTTCGTCCACACCTGCTC  
GCGCGGGAGCTTCCCTCTAAGCGGAACGCTCCCTACCGATGCATTTTACATCCACAG  
CTTCGGCAGATCGCTTAGCCCCGTTTCATCTTCGGCGCAAGAGCACTCGATCAGTGAGCTA  
TTACGCACTCTTTCAAGGGTGGCTGCTTCTAGGCAAACCTCCTGGCTGTCTCTGCACCCC  
TACCTCCTTTATTACTGAGCGGTCATTTAGGGGCCCTTAGCTGGTGATCCGGGCTGTTTCC  
CTCTCGACGATGAAGCTTATCCCCCATCGTCTCACTGTCCGAACCTTGACCCCTGTTATTT  
TGGGGTCATATCTAGTATTAGAGTTTGCTCGATTGGTACCGCTCTCGCGGCCCGCAC  
CGAAACAGCGCTTACCCTTAGATGTCCAGTCAACTGCTGCGCCTCACGCAATTCGGGG  
AGAACCAGCTAGCTCTGGGTTTCGAGTGGCATTTCACCCCTAACCACTCATCCGCTGA  
TTCTTCAACATCAGTCGGTTCGGACCTCCACTTAGTTTCACCAAGCTTCATCCTGGTCA  
TGGATAGATCACCCAGGTTCGGGTCCATAAGCAGTGACAATTACCCCTATGAAGACGCGCT  
TTCGCTACGGCTCCGGTGGGTTCCTTAAACCAAGCCACTGCCTAAGAGTCGCCGGCTCAT  
TCTTCAACAGGCACGCGCTCAGAGATTCTCCTCCCACTGCTTGGGAGCTCAGGTTTCA  
TGTTCTATTTCACTCCCGATGGGGGTTCTTTTACCTTTCCCTCACGGTACTACTTCGC  
TATCGGTACCCAGGAGTATTTAGCCTTGCAAGGGGGTCTTGCTGATTCACACGGGATT  
CCACGTGCCCCATGCTACTCGGGTCAGAGCGTAAGCTAGTGATGCTTTCGGCTACTGGAC  
TCTATCCATCTAGGGTGCAGCACTCCACCGCTTCGCCTAGCAGCACGACGCTTGTATTGC  
TCTCCCAACCTCGTTTTTACGGTTTAGGCTGCTCCCATTTTCGCTCGCCGCTACTACGG  
AAATCGCTTTTGGTCTTCTTTTCTCTGGCTACTAAGATGTTTCAGTTTCGCCAGGTTGTCT  
CTTGCCTGCCCATGGATTTCAGCAGCAGTTTCGAAAGGTTGACCTATTCGGGAATCTCCGGA  
TCTATGCTTATTTTCAAGTTCCCGAAGCATTTTCGTGCTTACTACGCCCTTCTCCTCTC  
TGGGTGCCTAGGTATCCACCGTAAGCCTTTCCTCGTTTGAACCTCGCCATTATGTGTG  
GCTATGCCATCCTAAGGTGCTGCTAAATGGAAGGATCTTATCAACGTCCATGAATGAGAA  
ATCATAGATCGAACTGCCGTCAGGAAAAATTGGGTGCTATCATATACCTTTGCATCGGC  
TAAGGTCACGAGCTGGAGATAAGCGGACTCGAACCCTGACATCCGCCACAGGGTAACCC  
ACCGCCTCTCGGGCTCCCGGACTGATTCTATCATAGAGGCCAACGATAGACAATAACTC  
CCCCCGAACAACAGCTTACAACCTTTCATCGTACTGTGCTCTCCAAAGAGCAACTCTTCTC  
AAAATCTCAAAGGGTGTGAGTTGGAATCCCATTTCTAAGGATTCCTTGTTGGTTCCGGAGGA  
TCCAGCTACACGAGAACCGGAGCTCTTCCCTTTTTCGCCCGGACTCTTTGG  
TCTTAAGAATGCTGGTTTCTTAAAGAAATGAGTGATTGCGCTTCTCCGACCTTACTGCCAAC  
CGGAGAGCGGACAGCTAATGCGTTCCACTTATTGAACAGGGTCTATGGTCGGTCTGTGAC  
CCCTGGATGCCGAGGCGTCTTGGGGTGATCTCGTAGTTCCCTACGGGGTGGAGACGATG  
GGGTGCGTCCATGGATTTTCCTTCTTTTGCACATTTTCGCTCAAAGGGTGAAGGGAGA  
TAGTGATCAAGCTGTTTCGAAGGGCCAACCTTGATCCTCTTCCCGAGGATCCAGATGAG  
GGAACCTTAGGAGAGCGCCGACTCCAACCTATCGTCCATGTACGATCCATACTAGATCTG  
ACCAACTGCCCATCTACCTCCTCTACGTTCTTGACAGCCCATCTTTGTCTCAGTAGAGT  
CTTTCAGTGGCATGTTTCGGTCTCTTCCCCATTACTTAGAAAAAGTGAGCCACCGGTTTC  
AGGTACAGATACATATACATTACCGCTGGACATTAGACATCCAACCCGTAATCGCAACG  
ACCCAATTGCAAGAGCGGAGCTCTACCAACTGAGCTATATCCCCCGAGCCAGTGGAGC  
ATGCATGAAGGATCAGATGCTTCTTCGATTCTTTTCCCTGGCGCAGCTGGGCATCCTG  
GACTTGAAACAGAGACCTCGCCCGTGAAGTAAATCATCGCACCTACGATCCAACCAATTG  
GGAGAGAATCAATAGATTCTTTTTCGGGGGCGATTATCCTTCCCGAACGACGATACAA  
CTCTCCGTGTACTGCGCTCTCCAAGTGTGCTTGTTCACCTTCTTCTTACCATGGCA  
AGTATTTGTGAATAACTCCGATGAGAAGAAAAAGAGGCGTTAAGAGACCTCCTGGCC  
CAACCCTAGACACTCTAAGATCCTTTTCAAACCTGCTCCCATTTTGAGTCAAGAGATAG  
ATAAATAGACACATCCATTGCACTGATCGGGGGCGTTTCGTAGTGACTGAGGGGGTGA  
AGACCAAGAAGTGAGTTATTTATACCAAGCATCTTCTTATGGCTAGATCCAATCTCCTG  
GTCCCTGCGGAAAGGAAAAAGAAATTCAGTTCCTTCTTTCGGGAAGGGAGGATTAGGGA  
AATCCTATTGATTGTCTGCTTTCTCCAGACCTCCGCGGGAAGCATGAAAAAAAAGGCT  
CGAATGGTACGATCCCTCCGTCACCCCAGAATGAAAGGGGTGATCTCGTAGTCTTGGTC  
TGTAAGATGCGTTGTTAGGTGCTCCATTTTCCCATTTGAGGCCGAACCTAAACCTGTGCT  
CGAGAGATAGCTGTCCATACACTGATAAGGGATGTATGGATTCTCGAGAAGAGAGGAGCC  
ATGGTGGTCCCCCGGACCGCCGGATCCACGAGTGAATAGAAAGTTGGATCTACATT  
GGATCTCACTGAATCGCCCCATCTATCCTCCTGAGGAGAAGTTTGGTTTCAAACCTCCGG  
TTCGAACAGGAGGAGTACGCCATGCTAATGTGCCTTGGATGATCCACATCCCCGGGTGAG  
GCGCTGATGAGCACATTGAACATCCATGTGGCTGAGAGCCCTCACAGCCAGGCACAAC  
GACGCAATTATCAGGGGCGCGCTCTACCACTGAGCTAATAGCCCTTGCGGGCCCCCAGC  
GGGAGGCCCGCTATGCCAAAAGCGAGAGAAAGCCATCCCTCTCTTTTCTTTTTCGCGCC  
CCATGTGCCACACGGGAGGGGATGGGGACGTAAAAAGGGGATCCTATCAACTTGTTC

CGACCTAGGATAATAAGCTCATGAGCTTGTCTTACTTCACCGTCGAGAAACGAAAGAAGA  
CTTCCATCTCCAAGCTTAGCTCAGACGTAGCTCGCTTCTTTAGCTCTCCCTGAAAAGGAG  
GTGATCCAGCCGACCTTCCAGTACGGCTACCTTGTACGACTTCACTCCAGTCACTAGC  
CCCGCCTTCGGGATCCCGCTCCTTTCGGGTTAAGGTAACGACTTCGGGCATAGCCAGCTCC  
CACAGTGTGACGGGCGGTGTGTACAAGGCCGGGAACGAATTCACCGCCGTATGGGTGAC  
CGGCGATTACTAGCGATTCCGGCTTCATGCAGGCGAGTTCAGCCTGCAATCCGAACCTTA  
GGACGGGTTTTTGGAGTTAGCTACCCCTGGCGGGATCGCGACCCCTTTGTCCCGGCCATTG  
TAGCACGTGTGTGCGCCAGGGCATAAGGGGCATGATGACTTGACGTATCCCCACCTTCC  
TCCGGCTTATCACCGGCGGTCTGTTTTCAGGGTTCCAAACTCAATGGTGCAACTAAACACG  
AGGGTTGCGCTCGTTGCGGGACTTAACCCAACATCTCACGACACGAGCTGACGACAGCCA  
TGCACCACCTGTGTCCGCGTTCCCGAAGGCACCCCTCTCTTTCAAGAGGATTACGGGCAT  
GTCAAGCCCTGGTAAGGTTCTTCGCGTTGCATCGAATTAAACCACATGCTCCACCGCTTG  
TGGGGGCCCCCGTCAATTCTCTTGTAGTTTCACTCTTGCACCGCTACTCCCCAGGCGGGAT  
ACTTAACGCGTTAGCTACAGCACTGCACGGGTCGATACGCACAGCGCCTAGTATCCATCG  
TTTACGGCTTGGACTACCGAGGTATCTAATCCCATTCGCTCCCTAGCTTTTCGTCTCTCA  
GTGTCACTGTGCGCCAGCAGGGTGCTTTTCGCGTTGGTGTTCTTTCCGATCTCTACGCA  
TTTCACCGCTCCACCGGAAATTCCTCTGCCCCTACCGTACTCCAGCTGGTAGTTTCCA  
CCGCTGTCCAGGGTTGAGCCCTGGGATTTGACGGCGGACTTGAAAGCCACCTACAGAC  
GCCTTACGCCCCAATCATTCCAGATAACGCTTGATCCTCTGTCTTACCGCGGTGCTGGC  
ACAGAGTTAGCCGATGCGTTATTCTCAGATACCGTCATGTCTTCTTCGGGAAAAGAA  
GTTACAGACCCGTGGGCTTCTACCTCCACGCGGCATTGCTCCGTACGGCTTTCGCCCCAT  
TGCGGAAAATTCCTTCTGCTCCCGTAGGAGTCTGGGCGGTGTCTCAGTCCAGTG  
TGCTGATCATCTCTCGGACAGCTACTGATCATCGCTTGGTAAGCTATTGCCTCACC  
AAGTAGCTAATCAGACGCAAGCCCTCCTCGGGCAGATTCTCTCTTTTGTCTCTCAGCCT  
ACGGGGTATTAGCAGCGGTTTCCAGTTGTGTTCCTTCCCAAGGGCAGGTTCTTACGCG  
TTACTCACCCGTCGCGCACTGGAAACACCACTTCCCGTCCGACTTGATGTGTAGGCAT  
GCCGCCAGCGTTTATCTGAGCCGGGATCGAACTCTCCATGAGATTATAGTTGCATTAC  
TTACCAATCTTCCGGTTTCGTAGACAAAGCTGATTCGGAATTGTCTTTTCAATCCAGGCTT  
GTATCCATGCGCTTCATATTAGCCTGGAGTTTCGCTCCAGCAATATAGCCATCCCTACCC  
TCTCAGTCAATCCCACGAGCCTCTTATCCATTCTCATTGATCACGGCGGGGAGCAAG  
TCAAAATAGAAAACATCATTGCGTTGGGTTAGGGATAATCAGGCTCGAACTGATGAC  
TTCCACCACGTCAAGGTGACACTCTACCGCTGAGTTATATCCCTTCCCTGCCCCATCGA  
GAAATAGAACTGACTAATCCTAAGGCAAGGGTCGAGAACTCAACGCCACTCTTCTGTA  
ACAACCTCGGAGCCGGGACTTCTTTTCGCACTATTACGGATACGAAAAGAAATGGAAAATT  
GGATTCAATTGTCAACTGCTCCTATCGGAAATAGGATTGACTACGGATTTCGAGCCATAGC  
ACATGGTTTTCATAAAATCCGTACGATTTTCCGATCTAAATCGAGCAGGTTTACAGGAA  
GAAGATTTTGTTCAGCATGTTCTATTTCGATACTGGTAGGAGAGAAGAACCCGACTCGGTATT  
GTTAAAAAAGAGAGGAAGCAGAACCAAGTCAAGATGATACGGATCAACCCCTTCTTCTT  
GCGCCAAAGATCTTACCATTTCCGAAGGAACTGGAGCTACATCTCTTTTCAATTTCCATT  
CAAGAGTTCTTATGTGTTTCCACGCGCTTTTTCGACCTCGAAAAAGGGACAAATTCCTTT  
TCTTAGGTTCTTAGGAACACATACAAGATTCGTCACTACAAAAAGGATAATGGTAACCCC  
AACATTAACACTCTTCTTCTGAAATTTAATAGTAATAGAAATACATGCTTACCAGACA  
GAATTTGTAACCTGCTATCCTCTTGCCTAGCAGGCAAGATTGACCTCCGTGGAAAGACT  
GATTCAATTCGGATCGACATGAGGGTCCAACCTACATTGCATTGCCAGAAATCCATTTGTATA  
TTTGAAACAGGTTGACCTCCTTGCTTCTCTCATGGTACAATCCTCTTCCCGCTGAGCCCC  
CCTTTCTCCTCGGTCCACAGAGACAAAATGTAGGACTGGTGCCAACAGTTTCATCACGGAA  
GAAAGGACTCACCGAGCCGGGATCACTAATACTAATAATAAGAAAAGAACTGTCT  
TTTCTGTATACTTTCCCGGCTCCGTTGCTACCGCGGGCTTACGCAATCGATCGGATCAT  
ATAGATATCCCTTCAACACAACATAGGTCATCGAAAGGATCTCGGACGACCCGCCAAAGC  
ACGAAAGCCAGGATCTTTTCAGAAAATGGATTCTTATTGAAAGAGTGCATAACCGCATGGA  
TAAGCTCACACCAACCCGTCAATTTGGGATCCAATTCGGGATTTTCTTGGGAGGTATCG  
GGAAGGAATTGGAATGTAATAATATCGATTCTATACAGAAGAAAAGGTTCTCTATTGATTC  
AAACGCTGTACCTATGGGATAGAGGAAGAGGAAAAAACCAGGATTTACATAGTACTTT  
TGATCGAAAAATCAATCGGATTTATTTCGTACCCCTCGTTTCGATGAGAAAAATGGGTGAGA  
TTCTACAGGATCAAACTATGGGACTTAAGGAATGATGGAAGGGAATAAAAAGAAAAGAG  
AGGGAAAGAAAATCGAAATAAGAAATCAAAGAAAATAAATAAATAAAAAATACAAAAATA  
AATAAAGATTCCAAATGAACAAATCAAACCTCAAAAAGGATCTTCTGATTCTCGAAGAA  
TGAGGGCAAAAGGATTTGATTCGAGAAAGATCTCTGTTCTTATATAAGATCGTGATTGA  
TCCGCATATTTTGGTAAAAAGAATAATCTTCTCCTTTGATCATAATCAAAAATGGAAGT  
GTTCAATTGGAACATGAGAACGTGACTGAATTGGTCTAGTTACTCTTCGGGACGGAGTG  
GAAGAAGGGAGGAGATTCTCGAACGAGGAAAAGGACCAATTACTTCGAAAGAAATTGAAC  
GAGGAGCCGTATGAGGTGAAAATCTCATGTACGGTTCTGTAGAGTGACAGTAAGGGTGAC  
TTATCTGTCAACTTTTCCACTATCACCCCCAAAAACCAACTCTGCCTTACGTAAAGTT  
GCCAGAGTACGATTAACCTCTGGATTGAAATCACTGCTTATATACCTGGTATTGGCCAT  
AATTCAACAAGAACATTCTGTAGTCTTAGTAAGAGGAGGAAGGGTTAAGGATTTACCCGGT  
GTGAGATATCACATTGTTTCGAGGAACCTTAGATGCTGTCGGAGTAAAGGATCGTCAACAA

GGGCGTTCTAGTCGTTGTAGATTCTTATCCAAGACTTGTATCATTGGATGATGCCATGT  
GAATCGCTAGAAACATGTGAAGTGTATGGCTAACCCATCACGAAAGTTTCGTAAGGGGA  
CTGGAGCAGGCTACCATGAGACAAAAGATCTTCTTTCTAAAGAGATTGATTTCGGAAC  
TTATATGTGCCAAGGTTCAATATGAAATCATTTCAGAGGTTTTCCCTTACTTTGTCCGTG  
TCAACAAACAATTGAAATACCTCGACTTTTTCAGAACAGGTCCGAGTCAAATAGCAATG  
ATTTCGAAGCACTTCTTTTTACACTATTTTCGGAACCCAAGGACTCGATCGTATGGATATG  
TAAATACAGGATTTCCAATCCTAGCAGGAAAAGGAGGGAACGGCTACTCAATTTAAAG  
TGAGTAAACAGAATTCCATACCTCGATTTTCATAGATACATATCAAATTCGTGGAAAGCCG  
TATTCGATGAAAGTCGTATGTACGGCTTGGAGGGAGATCTTTCATATCTTTTCGAGATCCA  
CCCTACATATGCGGTCAAAAAGCCAAAATAAGTGATTTCGTTTTTAGCCCGTATAAAAAG  
AAAACGGATTCTTGAACCTCTTTCACGCTCATGTCACGTCGAGGTACTGCAGAAGAAAAA  
ACTGCAAAATCCGATCCAATTTATCGTAATCGATTAGTTAAACATGTTGGTTAACCGTATT  
CTGAAACACGGAAAAAATCATTTGGCTTATCAAATTCATATCAAGCCGTGAAAAAGATT  
CAACAAAAGACAGAAACAATCCACTATCTGTTTTACGTCAGCAATACGTGGAGTAAC  
CCCGATATAGCATCGGAAAGAACGACGTGTAGGTGGATCGACTCATCAAGTTCCTATTGAA  
ATAGAATCTACACAAGGAAAAGCACTTGCCATTTCGTTGGTTATTAGGGGCATCCCGAAAA  
CGTCCGGGTCGAAATATGGCTTTCAAATTAAGTTCGAATTAGTGGATGCTGCCAAAGGG  
AGTGGCGATGCCATACGCAAAAGGAAGAGACTCATAGAATGGCAGAGGCAATAGAGCT  
TTTGCACATTTTCGTTAATCCATGAACAGGATCTATATAGACACATAGATCCGTGGATCC  
ATACATCTCGATCGGAAAGAAATCAATAGAAAAGAAAGAAATTGGAATGGATCGATATCT  
TTCTCGAAACAACGAAAAGGAAAAGAAAGATGAAACATAAATCATGGATCAACTAAGCC  
CTCTCGGGGGCTTTCTTAAGAATAAGAAGGAGGAATCTCATGGAAATACCATGGAATAAG  
GTTTGATCCTGTTTCATGGGGATTCGTAATATCCCATTCGAAAAATCGAAAGTTCGAAA  
CAATTGGGACTTTTTTCGAGATTGGATGCAGTTACTAATTCAGGATCTGGCATGTACAGA  
ATGAAAACCTTCATTCTCGATTCTACGAGAATTTTATGAAAGCGTTTCATTGCTTCTCT  
TCCATGGAAAGTTTCATTTTCCAGAAATGTATCCTCATTTTTGGCCTAATTCCTTCTGA  
TGATCGATTCAACCTCTGATCAAAAAGATATACCTTGTTTATATTTTCATCTCTTCAACAA  
GTTTAGTAATGAGCATAAACGGCCCTATTGTTCCGATGGAGAGAAGAACCTATGATTAGCT  
TTTCGGGAAATTTCCAACGAACAATTTCAACGAAATCTTTCAATTTCTATTTTACTAT  
GTTCAACTCTATGTATTCCTCTATCCGTAGAGTACATTGAATGTACAGAAATGGCTATAA  
CAGAGTTTTGTGTTATTCGTTATTAAACAGCTACTCTAGGAGGAATGTTTTTATGTGGTGCTA  
ACGATTTAATAACTATCTTTGTAGCTCCAGAATCTTTCAGTTTATGCTCCTACCTATTAT  
CTGGATATACCAAGAGAGATGTACGGTCTAATGAGGCTACTACGAAATATTTACTCATGG  
GTGGGGCAAGCTCTTCTATTCTGGTTTCATGGTTCTCTTGCTATATGGTTTCATCCGGGG  
GAGAGATCGAGCTTCAAGAAATAGTGAATGGTCTTATCAATACACAAATGTATAACTCCC  
CAGGAATTTCCATTGCGCTTATATCCATCACTGTAGGAATTGGGTTCAAGCTTCCCCAG  
CCCTTCTCATCAATGGACTCCTGACGTATACGAAGGAGTGCGGTTTCGTTTCGACAAATTC  
CTACCTCTATATCTATCTCTGAGATGTTTGGATTTTTCAAACTCCATGGACATGCAGAA  
GAGAAATGCTATCCCCACTCGGACCAAGACATAACTTTTACCAAAAGTTTATGTGATCT  
TTTTGTTCAAATAACAATTAAGGTGAAGCAGGGTCAGGAACAACGAATCTCTTTATGATA  
AACAGATCCATTTTGCAAGTTCGTTATTACGGGTAGTTCCTACAAAGGATCGGACTAATG  
ACGTATACAATACCTTGAATATTGATATCGATGTAGATGCTACATAGTTGGTTCTCATCCTCAGA  
GACTACGAGTGTAAATAGGAGCATCCGTCGACAAAAGGATCACCCCTAAGATGATCATCTCA  
TGGCTATTGAGAACGAATCAAATCAGATGGTTCTATTTCTCAATCTTCTGACTTGTGCT  
CCTACGGAACCGGGTCGAAAAGATTGAAAAGTCAGTCATTACAAACCACTGATGAAGG  
ATTCCTCGAAAAGTTAAGGATTAGTAATCCTTTTTAGAAATCGAATGGATTCGGTCTTAT  
ACATACGGGAGGAAGGTAATCAAAAAGAAAGAAAGGTGAGTCTTCTTTCTTTTATCACT  
TAGGAGCCGTGCGAGATGAAAAGTCTCATGCACGTTTTGAATGAGAGAAAAGAGTGAGGA  
ATCCTCTTTTCGACTCTGACTCTCCACTCCAGTCGTTGCTTTTCTTCTGTTACTTCGA  
AAGTAGCTGCTTCAGCTTCAGCCACTCGAATTTTCGATATTCCTTTTTATTTCTCATCAA  
ACGAATGGCATCTTCTTCGAAATCCTAGCTATTCTTAGCATGATATTGGGGAATCTCA  
TTGCTATTACTCAAACAAGCATGAAACGTATGCTTGATATTCGTCCATAGGTCAAATCG  
GATATGTAATTATTGGAATAATTGTTGGAGACTCAAATGATGGATATGCAAGCATGATAA  
CTTATATGCTGTTCTATATCTCCATGAATCTAGGAACCTTTGCTCGCATGTCTCATTTG  
GTCTACGTACCGAACTGATAACATTTCGAGATTATGCAGGATTATACAGGAAAGATCCTT  
TTTTGGCTCTCTCTTCAGCCCTATGTCTCTTATCCCTAGGAGGTCTTCTCCACTAGCAG  
GTTTTTTTCGAAAACCTCATCTATTCTGGTGTGGATGGCAGGCAGGCCTATATTTCTTGG  
TTTCAATAGGACTCCTTACGAGCGTTGTTTCTATCTACTATTATCTAAAAATAATCAAGT  
TATTAATGACTGGACGAAACCAAGAAATAACCCCTCACGTGCGAAATTATAGAAGATCCC  
CCTTAAGATCAAACAATTCATCGAATTGAGTATGATTGTATGTGTGATAGCATCTACTA  
TACCAGGAATATCAATGAATCCAATTATTGCAATTGCTCAGGATACCCCTCTTTTAGCTTC  
TAGGGTCTATTTCTTAGTTCAAGATCCCTTTTACTAACTGGAATAAAAAGAAATTAGTAGAT  
CTGTTCCGCCCCAAATGGGAATGGGCTGGGTTATGAACTTATAATCATGGAATCGACTC  
GATCATCAGATTATAAGTTTCAATCCATACCGGACCGAGCCGGAATAGGGTTATGTACATT  
CTCATTATGAGAAGGGGTCATTTCGAGCATATGTAAATAGAGACTATGTTTACATATGGAT  
CCCTACGTCGTTACATTCATTTAGGATTAGGAATAGGCGTAATCGGACCTGCTTTTTAC

ATATCTATCGTTATTTGGGTACCATATTAACCTCTTTGGGCTTCGATTGAATCGAGAAAT  
AGGTTTGATTGTACATCTTTTTGATATATATAAGGTATCCTCCGGATAATTCAAATCGAA  
GCAATTTGATGTCCGACTCGGGCTATATGACATGACCGATCGATAGAAATACTCCAAAA  
CTCCACCTTTGTATATATTTCCATATATCACACTAGATAGATATCATATTCATGGAATAC  
GATTCACCTTTCAAGATGCCTTGATGGTGAAATGGTAGACACGCGAGACTCAAAATCTCGT  
GCTAAAGAGCGTGGAGGTTTCGAGTCCTCTTCAAGGCATAATATGAAATGCTCATTGAAT  
GAGCAATTCAAATAACAGATCTCGGATCTAATCAATATGATATACATATACCAAGTATCT  
GTTGATACGAAGTATTCATCGATCCCCACGATCCGAGTCCGGGCTGTTGGAATTGGAAT  
AGGTTTCGGCAGCGGATCACGAAATCTTGGCGATCTTCTCTATCTAATGAATGAGGAGTCC  
GTTTTGAAATCGTCCGCCCTGCACCCACCCCCGAGTATATGCTTCAACAGGAATCACAC  
AAGGGTAAATTGATACAATAGAAACCTCTGGTAAAATGCCCCCGCTAACCCAACAGATA  
AAGTACATAGTCCGTTTTAGCCTGTTACATGAATCAAATGTTTCATTTTCATCCGGGAAAA  
GCCATCTCTTTCTCAACAATGCCTTTGTCAATTTGATCCAATAGCGTTCCGTTAGATAGGA  
ACAGATTTGATAAACTACTGATAACTCTCGGATGGAGTATTAGAACGGAAAGATCCATTAG  
ATAATGAACATTTGGTTTCGAAGCCATCTCTGGCGATGAATCACAATTCGAAGTGCTTTT  
CTTGGCGTATTCTTGATGAACCAGCGTTTATATATAGATGTAGGAGGATTTGTTTGGGAAG  
TAATAAGCCCTTTTGACATCTCTTCATCTGCAAAGAATCTCGGCGTGAAGAACACAGAGA  
CAAAGGGCTGATCTTTGAATAGGAAAAAGAATGGATCTGCAGGGTCCCAAATGAATTGGC  
TTATTCGAAAAAGCCTTGTTCTTTGGAAGATCTATCTCGTGTCTGGTACTGCATGGTTC  
CACTCTGCAAGAAGCTCCGAATCATTCTCTTGAAGCTCATCCTCTTTATGATAAATGATCC  
GCTTGCCCCGAAATGACCTGGCCCAATAGGGAAATCCCAATTCATTGGTCTTTTCGATAC  
AATCAAATAGATTGCCACAAGGGCGCCATATTCTAGGAGCCCAACTATGTGATTGAATA  
AATCCTCTCTATCTGTGCGGGTCGAGGGCTCCTTCTCTTTCCCTTCTTCAAACCTCCG  
ATTCGTATTTTTCATATAGAAATCTCTGATCAACGATAGAACAAAGATCCGTTTTGCATCA  
TATCTAACTGATTCCTTGGTTCGGACCGAAGAAGCAATGTCACTCGATCATTATCAAAC  
GACTGCAATCTTTTCTGTCCTCGTGAGGATCCCAACAGAGCGCCTTCGACTTCTAATAGGC  
CATGAAC TAGATCAGAATCATTTCTCAACGAATCCATAAGAAGTGATCCAATTTTTTTCAT  
CGGGTCCGGGTGGAGACCAAAGATCTTGAGCGACCGATCCGGCAGAACAACTCAAAGAT  
AAGAAGTATCGTTAATTTCTTCATGCTCGTTCCAAGTTCGAAGTACCATTTGTACAAAT  
AAGAATCCCCTTCCCTTACATGATTTCTTCTTCATATAGATAGATATAGGATCTATGGGGC  
AATTACTTAGAAGTACATTTTGTGCAACAGCCCTTCCCTATCTGATAGAAAAGGATCCCAT  
GATCCTGAACCGATCTTACCTGGGATCGCAAATCCCAAGTTTGTCTATGAAGAGCTGATC  
TAATTGTATTAGTGTCTATAATTGATTTCTTCTGTGTAATACTAATTGATAGGGCCTCAT  
TGGTAAGTGCTACAAGATCTCGTGCATTTGGAACCCATGGTTATGGACCCGAATCTGTAC  
TGTTAGTATGGAACATTTTCTTTTCCAAGTGAAATCCCCTAGTATATGAAAGAATGAAAA  
AGTGCTTTTCGTTGTTGTGGAATAAGAAGCCTTCGTATCTTAATGCATGTATTTAATTTAT  
TCGGAGCTATTAGAGTGGGATCCACTTTTGGGGAATATGAGTCAAGCAATAACAAGAA  
TATTTCTAGTGGAACATCTTTCACTATCTCTGGAGAGATAGTTCACTAATAGACCGAGGG  
ATAAGTAATTCGACTCATTCACATACAGATCATGAATGTTTGAATCCATATTATGCAAG  
GGGACATTGCTTTTGCTAATTTCTAATTGAAGGGTGGTATCAAAATCGGTCTATTTTCGGCG  
TCATATACATAGTTAGCACATTCGTATAGTTAGCAGCTCCGTATCAAGGTCATCATCAA  
TATCGTCACTATCATCAATATCGATATCGTCACTATCATCAATATCGATATCGTCAATAA  
GATAACCTTTAGGCTTGTCTATCCAGGAACCTTGTTCGGAAATACCGTAATGAAAGGAACAT  
AGGAGTTTGTCTAGTATTTTGACCAAATAGGATCGTCCAGTTCCTATAGAACCTATCA  
CTAAAAATACCCCTAGAAGGGGATAGGGCTAAGCGGAGCGAAAGGGTTTTCCATGAGATG  
GGAAATGAGAATATTAGCCCCACACGAGGTTTGTGAATAAGTGATTTGTCTGATAATGAG  
CAAGGAATATCCGCTTTTCTGCTAAACAGGATCTATTGAACTCATAATTCATTAGATACT  
TTTTATGAATGTCAACTAAGTATCGTAAGTAATGGATCCCGGTTGTTCAATCATTTGAT  
AACCAGAGTCATTCTTTGATAAACGATCACTATGAGTCAGACTCAATAGAATTTGATCAA  
TCCTTTTTTCCGTCGTTAAGGTGGAGAACTGAACCAAGAATTCTTCTTCTTCATCATCAA  
TCGAATCACTGTTTCGCGACCCAGGATTTCTATTTTATCATCAATCCAATCACCGTTCACGT  
TTTTTCTTTTCTTATCAATGAATAGATCTCTTTACTTGTACGACTTAGATGTCTCGTAT  
TTCTCGAAAAAGTGATTGATTGATGGGATTTGGTATGATACTGATGAGATCGATGAGAT  
TGATATTCAAATATTTCTTCTTAGAACGTATTGATTTGACCCCATAGCGGGACCAAC  
CCAATAGCATGTTGCGCGCAGAAGCAGAATCCCGTATTTCTTCCAGAGAATCTCCTAATT  
GTTCCAGAGCAACTAGAAAGAGATTCTTTAACCAGAAAGAATTTCAGTTCAGATGTAGGAT  
ACCTATCCAGAAGTTTTCGCAACTCAATCATGTATGATGGAATCATCAAAGATTTGATCT  
TTTCTAACTCTGCTGTGTAACCTCACTAGAGGCTCGGAAAAACAAGAGAAGATGTGTACGAA  
CGAGATATCCAGCAACAAGAAGAAGGAAAAAAGATTGAATAGAGGAACCTCCCAAGCATTG  
GTGATCTCAGATGTGTCCATATCAATGGAATGGGTGACTCATTATTTTCGATGAATCATTT  
CTTCGGACAGAAGAAGATTCTGTAAACACTTACTCGAACTCTCACTTATCAGATTCCGTT  
GTGGAAGAATCGACCACCACTTTTTCTGAGGAATTGGCCATGATATATCTGATCCATGCA  
TAATATCATGAAAAACGACACAAAATTTTGACTGTCACTTAGGGAATATTGAAAGGGAA  
TATTTCAATATCAAATAAATATTGTTTTTAAAGGTGAAATAAAGATATTTACACCCCGTCC  
AAGT

## Supplementary Table S5. 379NW\_C\_cassia\_full length chloroplast genome

TTATAGGGATAGCGAATGCTGGGCGAACGACGGGAATTGAACCCGCGCATGGTGGATTCA  
CAATCCACTGCCTTGATCCACTTGGCTACATCCGCCCCCTCCTCTCTCAAAAGGATTCCAT  
TTTCACCATTTCATTATTTTTTTGATTTAGTCTTTATTACTTCACTCTCCTTCCTGCTGAAA  
TACAGATATTGTACATAAAACAAAATGTTGTACGTAAAAAAGAAAAATGCT  
TTGATTTTTTCAAAAATCAAATTATTTTGAAGAATAAGAGTATATAAAATGCAGGTTGG  
TACAGAAGAACTACGATATTCGATCATGAAATAACCAGCGGTTTTCATAAGTTGAATAA  
AAGAAATGAAAATGAAAACGATTATGTGAATAAAACACTACTGAACCAAATAGATCAAT  
ACCAAACCTTCTTGTCTATTAAGAAGTTTGGTATTGATCCTTCAACGACTCGTATACACT  
AATACCAAAGTATTATCCGTTTGTAGATGGAACCTTCGACAGCAGCTAGGTCTAGAGGGAA  
GTTGTGAGCATTACGTTTCATGCATAACTTCCATACCAGGTTAGCAGCATGATGATATC  
AGCCCCAAGTGTTAATAACACGACCTTGACTGTCAACTACAGATTGGTTGAAATGAAACC  
ATTTAGGTTGAAAGCCATGGGTGCTGATACCTAAAGCAGTAAACCAGATACCTACTACAGG  
CCAAGCTGCTAGGAAGAAATGTAAGGAACGGGAGTTGTTAAACTAGCATATTGGAAGAT  
CAATCGGCCAAAATAACCATGAGCAGCTACGATATTGTAAGTTTCTTCTCTTGACCGAA  
TCTGTAACCTGCATTAGCAGATTCAATTTTCAGTGGTTTCCCTGATCAAACCTAGAGGTTAC  
CAAGGAACCATGCATAGCACTGAATAGGGAGCCGCGGAATACACCAGCTACGCCTAACAT  
TGAAATGGATGCATAAGGATATTGTGCTCTGCCTGGAATACAATCATGAAGTTGAAAGT  
ACCAGATATTCCCTAAAGGCATACCATCAGAAAACTTCCCTTGACCAATAGGGTAGATCAA  
GAAAACAGCAGTAGCTGCTGCAACAGGAGCTGAATATGCAACAGCAATCCAAGGGCGCAT  
ACCCAGACGGAACTAAGTTCCCATTCACGACCCATGTAACAAGCTACACCAAGTAAGAA  
GTGTAGAACAATTAGCTCATAAGGACCACCATTGTATAACCATTTCATCAACGGATGCTGC  
TTCCCATATTGGTAAAAAATGCAAACTATAGCTGCAGAAGTGGGAATAATGGCACCGGA  
AATAATATTGTTTCCATAAAGTAGAGACCCAGAAACAGGTTTACGAATACCATCAATATC  
TACTGGGGGAGCAGCAATGAAGGCAATAATAAATACAGAAGTTGCGGTCAATAAGGTAGG  
GATCATCAAAACACCGAACCATCCAATATAAAGACGGTTTTCAGTGTGGTTATCCAGTT  
ACAGAAGCGACCCCATAGGCTTGTGCTTTCGCGTCTCTCTAAAATTGCAGTCATGGTAAA  
ATCTTGGTTTATTCAATTCTCAGGGACTCCCAAGCACACAGATTATCTATAAATAGAAAT  
AGACAACGGAAGGCTTGTATTCAACAGTATAACATGACTTATATGTCCGTGTCAACCAA  
TAAGAGAGATATCTATCTGGATAGATCCATCCGAACGATTTGTAAATTAAATGAGTAGGG  
ATTTATCCAATAACAAATATTTTTTCGTATTTTCCGTACGATTGGTAATGGGTGCCCCG  
GACTCGAACCCGGAACCTAGTTCGATGGAGTAGATAATTCCCTTCTTGCAATATAATAGAT  
ATAGAGTAAAAAGACCCCCAAAAAGCCGTGCTTGCATTTTTCAGTGCACAGGGCTTTA  
CCTATGTATACATCCAAAACCTAAGTTCCCTAAAAGGGGACCTAAGAACTTGAAGACTCA  
GTTGATTCAACCACCTAGTATGATGAACATTTTCAAGATTCAAATGAATAAATGATTTTTGTG  
ATTTTATCTCTTCATCATTTAGGGATCCTTTCTATTTACATGACCTCATGACCAATCATA  
AATGACTGACTAGGTCATTGATACGGATAATATCCAAATACCAAATCCGTTCTCTATGTG  
ACCTATGAGAAGGAGAAGAGGTTGTTGGGAAGATCAAGAAAGAGCTTGTCTTCTCCCG  
TAAAGAATTCTTCCAAGAACTCCGAACCTAATCTTTTCAAAAAGCAGGTATCGTACTTT  
TATGTTTACGAGACAAAGTTCTAGCACATGAAAGTCGAAGTATATACTTTATACGATACA  
AACTCTGTTTTTTTGGAGATCCACTGTGATAATGAGAAAGATTCTGCATATCCGCCCAA  
ATCGATTGAGAATCTCAGAATCTGACAAATCGGCCCGAAACGGCTTACTAATGGGATGCC  
CTGATACATTACAAAATTTTGTCTTAGCCAATGATCCAATCAGAGGAATAATTGGGACTA  
CGGTCTCGAATTTCTTAATAGCAGTATCTATTCGAAACGAATTCTCTAGCATTTGACTCC  
TTATCACCGAAGAGTTTGTGCTGACTGAAAGATAGCCAGAAAATAGAAGGGATGAT  
TATATAATTGCTTTATATGGATCCTGGCCGTTGAGACCCACAGTCAAAATGACATTTGCC  
AAAAGTTGACAAGGTGAGATTTCATTTCTTTATCAGAAGACGAGCCCCCTTGAAGCCA  
GAATCGATTTTCCCTTGATATCTGACATAATGCATAAAAGGGTCTTTGAACAACCATAGGG  
TTTTCTGAAAATCGTTACAAAGCACTACTACAAGATATTCTATTTTGCATAGAAATGTG  
TTCGCTCAAGAAAGGATCCAAAAGATTTTGATCGTAAATGAAAGGGTTGTTTACGGAGAA  
AAATGAATATGAATTCACATTATATACATGAGAATTAGAGAGGAACAAGAAGAATCTTT  
GATTCTCTTTTGA AAAAGGGAATGGAATTTTGGAGTAATGAGACTATTTGAATTCC  
AATACTCGTAGAGAGAGAATCGCAATAAATGCAACGAAGGAGTATCTTGTATCCAAGAGT  
GAAGGGTTTGAACCAAGATTTCCAGATGGATGGGGTGGGGTATTAGTATATCTGACACAT  
GATTTAAATGTGATAACTTGTCTCGAAAAAGGGAATATTGAATGAATAGATCGTAAAT  
TATGAGATTTTGTCTATTTCTTTCTTCTAGGGAAGATACCAATCGCAGCGAGAATGGAA  
TTTCCACAACGACTGCAAAACCTCCGATATCATTTGAGAATCAAAATGATTGTTGTGCC  
CAACGAATCGATTTTGATTAGAATCATTAACCGAAATAATCAAACGATCTGTGTATGCA  
TTCGAGTAATTAACGTTTCACAATTAGTGAACGGATTTATGTGTCATGATCTAAATTTT  
CCACCGGTTTCATAAAGAATCGATCCATTTAAAGCATGACCATGAGCAAGCGCGTAGATAT  
ATTCTTGAAATAGAAACGGATATAGGAAGTATTGTTGCCGAAATCCATCCATTTCTAAAT  
ATCCCTGTAGTTCCCTCATTTTCCATTTGAAATTACACTGAACCAAATGGGGGATTTCTT  
GAGTTATCAAATAATACATAGTACGATACGGTCAGAACAGGTATATAGTAAGAAAAGAA  
TAGATACCCCGGAGCCAGAAAGGACAATCAACGGATCCTATTTCCATCCAATTTATTTAT

GTTCGTTATAGTTACAAGAGATGGTTAGAAATCCTTTATTTTTACAACCCGATCACTCTT  
TTGACTTTGGAATAATGAATTTTGATCAGTATACCGTTTCTTCTACACATTCGTCTCCAC  
TACATAATAGAGAACATAATAGAGAATAGTTAGGATTCATTAAGGAAATGATGA  
TCCACTCACAAGACAACCTTTCCACATCAGGCACATAATATTTTTTAACGTCTAATA  
GATCGGGTAATCATTGCAATTAAGAACAACAGAAGCTCGTTGCTTTTGGTTTCCCTATA  
ATTGGAGCTATAGGGCTCTATCCATTTATTCCTCGACCAACTTGAATTGATTTGACCC  
CTTTCCAAGAAAAGAATCAAAACAAGATTTTGATCGATCCGTTAAGGATGAAGTATCT  
AAGAGTTCTCCATTGATACGACATGCTGTTTTTTCCTTTCATTCCTTTCAGGATCAGTC  
GTGGTCTTACAACTCCCAATGGTATGGACGAATCCGTTGCTTCATCAAAATGTGTAA  
AAGACCATAGCCGCACTTAAAGCCGAGTACTTACC GTTGAGTTAGCAACCCATATAAA  
TAGGGTGTGTAGATACGATCGGAATAAAAAATAAATAAAGAGATTCGATTGCCCGACCTC  
GTCAAAACATTGAACTAGCAACAGATCAAAAGAAAGATTTGATGATCAATTGTGAACAT  
AAAAATGAACAGAGATCAGATGAAAATACAACAGATTCGCGGATAAATATAGAGAAAAT  
CTAAATAGATGTAATAATTGATAGACTACCCATACTCTATTTTTTTTTTTCATTATA  
TTAACTAAGATACCTTCTGTGTGTCACAACGAAATTGACGAACCCATCGTTGAGTGAAATA  
AAGAAACAACTTATGAAATGTGGATAAATAGATCTATTTATCCACGATCGAATTATATT  
TGTTGATACACCATTGTCAATATGAATTGAATGTTGAGAAAACCAATTCAATA  
AATAAAACAAGGACTTGTGTTGGAGTGACACTACAACATAGATAAGGGATGAAGTATGAG  
TGGGGAATAAATAAGGAATTCGGGTAGGAAAAAATGTGGGTTTATTCAATATTTATT  
CAATAGAGGTACAATAAGCAAGATTGACCTTTTGTGTTGTTGGTGAGTCCCAACGAAAC  
CATCTGATTGATGGTAATCCCATAAATTTCCAGTTATTTTCTATCTATCACTCAATCTTTT  
TTCTATCTGTCTCATATCAAGAGAAGATATTTTTTTTTTATAGTCTATGATACGGGGTC  
ATGTGAGAGCAACAATGAATAGAGAATAGAGAAAAAATAAGGAATGGTGGAGAAACAA  
TTAGACAAAGCTAGATACTGGCCCCCCCCCTTTTTTTTTTATTTTCATTAATTTCAATTGATT  
AATTCGAAATTCCTTAAATACCTCCGCCTTCTTTGAAATATCATGAACAGTTCTCTGTAGG  
TTGAGCGCTTTTCAAGGAAATATAGAATAGCGGAACATTGAAATAAGTTGGTTCTT  
TATCGGATCGTAAAAACCACTTTACGAAGATCTCTCCCTCTCTTCGGGATCGAACATC  
AATTGCAACGATTGATAGATGACTCATTTGGGATAGACATAAATGAACAACCCCCCTAG  
AAACGTATAAGAGGTTTTCTCCTCGTACGGCTCGAAAAAGAATGATTCGAATTTATGTAT  
TGTAAGGCAATAGATCCACAAAATCATCAATTAGACTATGATTTGAGTCATTTTTTTT  
TGTTCTTCTTCTGTAAGAAAAAAGAAATCTCATTCTGACTCATAACTCAAG  
TTGGGTAATTCTCAAAGAGCTCGAAGGGAATCCTTAGACATTTATTGAGCCGTCTCTAA  
CCTCTTTTGTGTTCTCGCTAGAAATCGATTTGATTTCTTCCCATCTGATCTAGTTGT  
TGAGACAATTGAAACCGTGTTTCTTGTTCGGTATCCTTTATTTTATCTTTGCTTGA  
ATCCTTGGGTTTAGACATTACTTCGGTGATCCTTAATTGTTTCAAAATGGTAGCAACATA  
CCTTTTGTATTTCGTTCTATGGAAACGATTGATTCCTCTGTGATACATTTTGATCGGA  
ATTGGTAAACATTTTTCGACAATTCATTTTACTTTTTTTTTTTTACTTGTTCGAACCTG  
ATCCTTTCAATTTCTATACCGAAGATATACTTACGAAGTTGTTCCAATTATTGATTGGC  
ATTAACCCTAGATCCTTCTCTGCTAAATGAACCAATCTTTATGCTCGAGCTCCATCA  
TGTCATATATTATAATATATATTTTATTACAACCCCAAAATTTGGGGTCTAGTGGAAAT  
AGAACAACCTATGTGAGCCGAGAGCATCTTCTTTGATATATAAAATGGTGGGTACAAGA  
ATCCACAGCCAATAATGTCCTTCAAGTCGACGTTGCTTTTACCACATCGTTTCAACG  
AAGTTTTACCATAACATTCCTCTAATTTTGGACCGGTATGGAATTGATTCAATATGGAAT  
CATGAATAGTCATTGGCTCAATCGGTATATAGTATATGAAGTCTCCATACTTTCATTTT  
CATATATGGATCTGGAGAGTCTCAGCAAGAATATAATTTAACCCCATATTTTATTAGAA  
GAATGAACACATTTATAAAAAACAGAAAGAAATGCGTTGCTTAACACTTCTTTACATCT  
TCAACAGATTGTTAGGGATGATGAATCATGAAGATCCAATTCTTTCTCAACAACATAA  
ACTAAAGAAAGGCTAGATTACCGATACCGGAACAGAATGAGTCATTAACCAATAAGCT  
ATTCCAATGACCGGGAAGATCGCAAGTGAAGTCTGATAGGATAGATTACCAATGTACAC  
TTCTTCGAGGAGAAAGAAATTTATAAGGAATCATAAAAACAATTTCAAGAATTTCTTACT  
TCGACATCATTACTGGAATAAGTTTCCAGTAAAGACTGAATTGAATCTCTAAATCCAT  
CAACAAGTCGGTACAACGAGGATCTAAAAATGTTTAGCAGATATCTGATTAATTAATCA  
GACGCGAATTTGATCATCATATAAGAGACCTCTATGTTTCTTTCCGATTGAATCATCAATA  
ATTTAAACAGATAAATGGGTCAAGAAACAAATCCAATTGTTTTGTTTTCTTGGGGATGG  
ATAGAAGGGGCTCATGAAAGAAAAGATTAAGGTCGGTATGGTATTCTTTCATC  
TGATTGATAAAATCAGAAATCGTAGGAGTCTGATTTTATCGTATTCATCAGATACACCAA  
CAAGTGTTACCGGGGTAATCGTGGGTATTTAAGGGATCGCAGATCTTTTCGCCAAAAC  
TGAACACCGGTGTCACTGATCACTGAAATAGAACAATAACAATATATATAGGCATGGTT  
CATTTTCTACAGATTTTCTTACTTCTGATTCAGGAATCTTTCCATAAAGTAAAGTGAG  
TGTATGAATCTCCCCCTCCCCAATTGATCGCTACATGATTTCCAATTATTCATTGGA  
GCCAAATCAAATCAAAATAAAGAAATTAGGTCCAAGAAAATAATCCGTTCCGTATTG  
AATTTTCTGTTTGTAAATAAGATCCGGATGACAAGGGTCTTGAAATTGATACCTTCTCT  
TCCTTTGCGGATTAACATCATCGACACGAATTCATGGGGATCATGAATCATACCCAAA  
GCCAATTTAAAGGATCTCTTATGGGATGCTATCCTGTCTTGATATAAGTACAAAGCAA  
ATGGGTTTCATATCAATTCGTTGTTACTATTTTGTGTTGATTTTGTCCACCCAGTCTCAG  
GAGCTTTAATTCAGCGATGGAATTAATACCAAGAACCCCCCGTTTTTTAGGATTCAGG

ATCCACATAGAATTAGTCATTTTGTCTACCTATCTTTATTTATATTTACTTTAGGGAAA  
GTAGAGACTTCTCTTTTATTTTCGCATTTTCGACTCAGAATGCATCATGTGAGAATCCAAAT  
ATCATAGATATGGGGCATAAAGTTTATCCAAATGACTAACTAACCTTCAATATGAATATG  
GGCGAAGGGGCGAACAATACGCTGAATGGCCACCCAGTTTTTTTTTTTGAATTTCACTT  
TGATCTTTGTTCCCATCTACCTATATCAAAAAAGATATTTATTTCCATCCACATGTCAT  
TGATACTCGATCCGTTTGTGTTGTGAGAAACAAAATCGAAAGGGAAGATATGATTCTATAG  
AAGAATCATTAGAAATCAAAAGAAAGATTGGATCATTGTATCCACATTACACCCCTT  
AAACAGAAGATTGTTAAAAAGAACAACTTTGTTATGATAGAATTGGTCTGGGACGGAAG  
GATTCGAACCTCCGAGTAACGGGACCAAAACCCGTTGCCTTACCCTTGGCCACGCCCA  
TTTTTATTTCTATTCGGGCACCAATAAACACTAATATCGGTATTGGTTGTTTCGTCAATTCC  
AGCCCCAATATCTATTGAATTGGTTGTTGCTATGATTCTACACATGTAGATGTAGAATCA  
AAATGAATTTATTGATCATTACATATAATTCAATTAAGATATTGTATGTAAGGTATGATT  
CCTTCTATTTCTCATTTGAGAATTGAAGGATTTTTGATTGAGGGAGTTCAAAGAAAAAGAA  
AGATTTTGGCGCTACTTTCCTTCTTTCTTCATTTTCCCTTATATCAATAACCCAATA  
ATAATGAAATTTTCTCCAAGAACAAAATGTTTGTATGCTTAATATCTTTAGTTTGATCT  
GTCTTAATTCTGCCCTTCATTTCGAGTAGCTTTTTCTTCGCCAAATTGCCGAAGCTTATG  
CTTTTTTCAATCCAATCGTAGATGTTATGCCAGTCATACCTGTGCTCTTTTTCTCTTAG  
CCCTTGTTTGGCAAGCTCTGTAAGTTTTCGATGAGATCTTTAATACTGTCTTAGAAACA  
TTCATGATTTATTCGATAAAAAAAATTCATTTCTTAAGAATTGATAAGATCAGATAATG  
AACCCCTCGACTCAAAACATGGAATTTCTTTGGATAACCGAGATGAATCGGAATCACCTCA  
TTTCTTCATTCTCTGCGGGTGAAGACCCCTATGTATGGTCCCTACAATACCTAATTGT  
AGGTATGAGAGATCATTTTGTTAACGAAAGAATCAGAATCTTATTACAAATGCATTCCCTG  
CAAATTTCTTATGTTTTCTAGAAACCGCTTCTTTCTTGGTGTCAAAACGGAATATGTGG  
TACAAAAATGGAGAATCTATTTCCCTATTTCCCCCAAAATGATCTTGAGATTGTGTAAT  
GCTTACTCTCAAACTCTTCGTTTACACAGTAGTGATATCTTTGTTTCTCTCTCATCTT  
CGGATTCCTATCTAATGATCCAGGACGTAATCCTGGACGTGATGAATAAAAAAATCAGGG  
GTTTTTCCCTGCTCGATTCTGAATTTTCTTAGGATTTTCTTCTCCATTCCATACATTT  
AACTATGAGAAAGGGGGTTAGAGATTTTTTCGAATTGCAAAGGGAAATATCAAGTGATCA  
GAAGAAACGGAGAGAGGGGGATTGCAACCCCTCGGTACAATAATTCGTACAACGGATTAG  
CAATCCGCGCTTTAGTCCACTCAGCCATCTCTCCCATTTTAAATGGATAATTCATATG  
TGACGCGTGAAGTAAAGTTGATAAAAGTTTTTCTTATCTTTCTTTATCTATAAAATAT  
AGACGAATTTGATCAATCATCAATTCCCTTTAGATAATGATTGCAACAGATATCTCCAA  
TAGAAAGAGTACCTCTTTGATTTTCGTCCGAAAAGTTCTTTCTTTTATTCCCCGGCTGG  
CCAGTACCTAGCCAGGCCATTCCCTTGTTCCAATGAATCATAGATCAATGATTTATTGTA  
TTTGAAAACGAAAATGCTTGTTATTGAAGCAGCAACAAGGCTATTTCCATTCCATGATA  
GGAGTGTCATTTGTTATTATGTTTTTCTTTTCTCGATTTACTTAAATGGAATAAAAAAA  
ACATATTTTTTTCTATTATAATAGAACTCATATATTTCTTCAAAGAACATGTTTGAACCT  
GAACCCCTTGAGTCCACAACCAAAACAATAGGATTTTTCACTCGATCCAATCGACCCGAAT  
TCATAAGATTTGGCAGTTGAATGAATAGGAAAAGGAGTAGCTTCGAAAAAGAAAAATGGA  
GCTCTGGATTCTGTACAACCTCAACTCATTTTATGTTCCGACTTCAATGGCTCTTTCCGG  
GCCGGGACTATCAGTAACGGCTCCCCGATAAAAAGCTTGTTATTGAAATGAACCTCCTTCT  
CCTATTTTATCAAGTCTCCCGTCAGAGCACAAACATGTCAGCACCCCAATTTTCATGATT  
CTGATCCTATCTTGATTACGTTTACGCCCCTTGTTTCGACAAATGGCCCGCTCGTATACAA  
TAATTATATTGTAGCGGGTATAGTTTAGTGGTAAAAGTGTGATTGCTTCTATTAACAAGT  
GAAATAGATAAGGGATCTTTCGTTTGATTCTTCTGATCAAAAACCTTTATTTATTTAAA  
AGGGCATTAATCCCTTACCTCTCAATGCCACATTTGAGGAAGAATAGACATTCTCGTGAT  
TTGTATCCAAAAGTCAAGTCAATTAGAAATTGACTAACAAAATTGGATTATGGAATTGCG  
AAGCATAAATTTTTTTTTTTTGAAGTTGGATCAACCATTCCAATTGAATGAGTATAAGTAA  
GGGATCCATGTATGAAGATACAAAAGTCTATTTCTAATCGTAACTAGATCTTCCATTTTT  
TTTTTTTAGGGGGAGATTGAAGCCAAATAGCTATTAACGATGACTTTGGTTTACTAGAG  
CCATCGACATATTGTTTCAGCTCGGTGGAACAAAAAATCTTTTCTTCAGGATTCTTGC  
AAGTACAAATAGGGAACGAAGTAACTAGAAAGATTGTGAGAATCCTCCTCTTTCTAGAG  
GGATCATCTAAAAGCAAGTCATTTGGGGTGCAATTCAGACGAAAAGGCTGACATAGATGT  
TATGGGCCAAATTGATTTCTTTGAATTCAGATTGCTATGACTCCCTTTTCCCATACATC  
GTAAATTTTTTTAGTTTTTTTTTATGTCTTAGATTGGAATCCCATAAAGGAGCCGAATGA  
AACCAAAATTTTCATGTTCCGTTTTGAATTAGAGACGTTAAAAATGATGAATCGACGCTCA  
CTATAACCCCTAGCCTTCCAAGCTAACGATGCGGGTTCGATTCCCGCTATCCGCTTCATA  
TTAATTATATATAACATGCTTTTGATATGTCCCTAAAATCTTTCTTTTCACATACAATCC  
TATTCCTTTTTTTTATAGGAGATAGGAAAGTCAGAACGTGAAGAAATCGGAATGAAAAG  
CGTCCATTGTCTAATGGATAGGACAGAGGTCTTCTAAACCTTTGGTATAGGTTCAAATCC  
TATTGGACGCAATTTATTTCCATCTATTTTGTAGATTGCTATGTCAAGAAACATATTTT  
GAATGATTCGAATCGGGGACATTTCTCAACGATTGCTCTTGTAAGAGTGATCAATT  
TCTTTATGTTTGTCTGAAGTAGAAACAGTTCTATCTGTTCCGGAATAGCTTCCCTCAA  
AAGGGCTTCCGCTTGC CGGTAAATGTCTTGGTAGAAGATATGATTTCTTGGACGTGAGG  
TTTATTTGTTTTTAAGTAGGTACGTAACGAACGAGAAATTTCTTTACCTGTCCAATTTT  
TAACGGATCAAGATACCATTCGCTCCGGTATAAATAGTCACTATATGTTCTTCCACCGT

GAGAGGGGCTGATTGGGATTGTTTGAGCAACTCACGTAATCGTTGACCTCTTGCCAATTG  
ACTCTGAGTGGCTTTATCGAGATCAGAAGCGATTTGTGCAAAGGCTTCTAACTCTGCGAA  
TTGAGCCAGTTCCAATTTTGATTGCGAGCTACTTGTTCATGGCTTTCATTTGAGCTGC  
AGATCCTACTCTCGAGACAGAAATACCCACATTAATGGCAGGACGGATTCCGGCATTGAA  
TAGATCAGCGGATAAGAATATTTGTCCATCTGTAATGGAAATCACATTAGTAGGGATATA  
AGCCGAAACGTCCCCAGATTGAGTCTCAACTATTTGGTAAAGCGGTCATACTTCCTTCACC  
TAAACGAGAACTTGATTAGCGGCTCTTTCCAAAAGGCGTGAATGCAAATAAAAAACATC  
TCCTGGATAAGCTTCGCGGCCGGGCGGTCTTCTTAATAGAAGAGACATTTGACGATAAGC  
TTGTGCTTGTGTTGGAGAGATCATATAAATTATTGAAGTATGTCGTTACGGTACATAAA  
ATATTCAGCCAGAGCCGCTCCTGTATAAGGAGCGAGGTATTGTAATGTAGCAGGTGAATC  
CGCCGTTTCGGCTACCACAATAGTGATTCCATTGCCCCCTCGTTCTGGAAAGTGGTCAC  
TACCTGGGCCACGGAGGATGCTTTTGGACCAATAGCTACATAAACACATATTACATTTTG  
CCCCTTTTGGTTGAGAATAGTATCTGTGGCTACTGCTGTTTTCCGGTCTGTCTGTCCCC  
AATAATTAATTCGCTGACCGCGTCTATAGGGATCATCGAATCAATAGCAATAAGTCC  
CGTTTGAGAGGCTCATATACGGAACGTCTCGAAATAATACCTGGAGCAGGAGATTCCGAT  
TAACCGAGATTGAGAAGCTGAAATTTACCTCTCCCATCAATAGGTTTAGCCAGAGCATT  
TATAACACGACCCAAATAAGCCTCACTCACTGGTATCTGAGCAATTCTTCTGTGCTTT  
TACAGAACTTCCCTCTTGTATCATCAACCATCACCCATTAATACAACGCCAACATTATT  
TGATTCAAAATTCAGAGCAATGCCTATTGTACCCTCTTCAAATTTCTACTAATTCCCCTGC  
CATTACTTCATCAAGACATGAATACGAGCAATGCCGTCGCCTACCTGAAGTACTGTGCC  
GGTATTCACAATCTTGACTTCTCTATTATATTGTTCAATACGTTACAGGATAATATTACT  
AATTCGTCGGCTCGAATGGTTACCATTAGTGTCTCTTAATTTCTTTTTCGGAAACAAAGA  
AAAAAAAAAAAAAAAAAATAATGCCTACAGTAGAAGGGCTAATCAGTTACTTCTTTTCATG  
GCCCCGAGCATGCCAATATTAGCACCGATGGTGCCTAAATGTAACGCTGTTTGAACAA  
CTATTCAGAGTTCCTAGAGCTCCTTGTAAGGCTTGTGGAAACTCGTTGTGCGACCTGA  
TTAATTGCTCTTTGTTGTTCAAAATGAATGGTTTCATTTTTGTAATTTTCTAATCGTTCC  
AAATTCCTCATAAGTGGCATTAAATCAAATTCATTTTTCTCGTTCTATCTCAGAGTATCCA  
TTCACTCGAAACTCATCTGCTTCTATTTCACCTTTCGGTAAGCGAGCCCGGGCTTCTTCG  
AGCTGCTCAATGGCTCCTTCACGTAGTCTTCTGAATTTGCAATAGTACTCAAGATCCTC  
TGTTTTCGATTATCTAATAAACTCACTTAATGAAAGTAGATTATCTTCCCATTCATTTAC  
AATTCATTTCCATGATCTCTTCCCGAACCAACATGAATCTTTCGATTTCATTTGGCTCT  
CACACTCAGTTACTTAATGGGTCATTCCATCTATTTTAATGTAATGAGCCTACCCCTCTCT  
TCTCTGTTCTGATTTCCAAGATATCAAACTGATACGAGACCAGAATATTCGGAGGACTCT  
TCCGACCCGACAAAAAATCTGTCTATTGTCAGCAAAGTGTCTTCTTTTTTTTTTGTGTTTC  
TTCAAATCCAAAAAATTTCTTATTTTAGACATAGGTCATCGATTCAACATTGGATAAAA  
AAAGGGCGAGACCTATTTTACAGTAAATGGTTCAAATCATTTTATCGATATGAGTGT  
TCTATATCGGATAAATTTGCCAATTTTTCATTTTTTTCGAAACCATCTCCGTACTAACGTAG  
TGGTAGAAAGAGTACCATGTTGTGCCTGGACTTCAAACGGTTTCGCTTTAACCATGTTAA  
AGTCCCCACATTATTGGCTGATAGAGAATCAAAGTTGATTTACCAATAAATTACGAAATG  
CTATGGTCTTACATATGATTCTTAAATTTATTCAGAAGTAATTCGTCGAGATCGTGCAC  
CTTCTTTCTCTATTTATAACTTTCCCATTCAAAAAAGGAAAGTGCAGCCGGT  
TGGATCCAGCCTATTCTTGAAATACACAACCTCGCACACACTCCCTTTCCAAAAAAGATCA  
ATACACCAAGCACTACACTTAGATTATTAGATTGTTGCTAAAATATCGGTATTAACC  
CGAACTCCCAGCGGATGGCCAGTGACCAAAGGAAACGAAAGAATCGGTTACATCTCTCA  
TATGCTTTTCTCTATAGATAGGACCACAAAATGGAACAGAGTTCTTTTGTATCACTT  
CGCCCCCTTTGTTTGGATTGATTTCTTTTATTAAATTTCTTATTATAAATATGAATAG  
ATTCAATTTAAGAAATATTTTCTTTATTATTATTTCCATGGAAATCTCAATAATCTAT  
TTATTTAGTCCAGGTTTCATGTCAATTACGAAATACCTCGTTTGTGCAACACTTCCTA  
AAAGTAAAAAAGAGTTTCCATTAAAGAACGGAAGGGAAGAAAGCAAGTGGGTCTGCTATGC  
TAATTCCTCATCTCAAATCACTCCATCCCCGGGGGTATTGTCTCAACGAAGAAGTGATT  
GTAGGAGTGAAAGTTTGGATATAATTTCGCAAGGCAAGCCCGCGGCAATAAAATAGGAAAA  
GAAAAAAGTATTTATTTTTCACATTTATAGGATTAAACAAAAGGATTCGCAATAAAAG  
CGTAATGCCACGACCAAGTCCGTAAATGTTAAAGCTTCCATAAAAGCCAGACTAAGCAA  
TAAAGTACCTCGATTTTACCCTCTGCTTCTGGCTGTCTCGCGATACCTTCTACGGCTTG  
GCCCGCAGCAGTACCTTGACCAACTCCAGGTCCAATAGAAGCAAGTCCACAGCCAATCC  
AGCAGCAATAACGGAAGCGGCAGAAATCAATGGATTATATTAAAGTTCTCGACCAAAA  
AAAAGAAATGGTTAATGATACAATCAACCGATGAATTATTACTTCATTATTCCATCACTT  
AAGATCTATCCGAAAAAAGAACTAAGAACTCTGAATTGAAATAATAATATTACTG  
AATCATCAGAGCTACTTCGATATCTCGTTTTTAGTTCCTATCCGTGGAGTCTTTGTAAAT  
CTATACGGTTCAGTCTCTCCATTTCTTTGTTCCGAACCATTCATTTCTTCAATTCTTC  
GCTCTTTCTCTCTATATGCATGCTTGACTTCATTTGTTTATTCATTCAATCCACAGTCA  
CAGATAAAACGGAAGGGCTTGCAATTGGAATCCGTCTAAATTCAGTGGGATGGGAAATAAT  
ATATATGGATAGCCATATAAATACTAGTGAATATCTAATATCACATATACATTGTTTCTT  
TAATAACGTAAACCATCCGTATCTTCTATTGAACCGGATTCTAGAATCATTTCTCGAAAC  
ATATACAGGGATTGGCTTAGAGCCCTTACATATACCCAGCTCGACCCCTTACTTTTTTT  
TTAATTCCTAATATCATACATTTTTTTTTTGTCTCTATTCTAGATCGTATATACCGGTA

TGAGTTGGGATAAGCTTTTTTTTAAAGACCATTTCGGAAGCTAGTCAATGATGACCCTCCA  
TGGATTACCTATATAAGCTGCGGCTAAAGTTGCAAAAATAAGAGCCTGAATCCCGCTTG  
TGAATAATCCAAGGAACATGACAGGTATAGGAACCACCGAAGGTACTAAAGAAACAAGAA  
CAACAACCTACTAATTCTCCGCTAATATATTCCCGAAAAGTCGAAAACCTAAGTGATAAGG  
GTTTTGTGAAATCTTCTAGAATGTTAATTGGTAAAAGTATTGGAGTTGGTTGAATGTATT  
TACCGAAAATAACCAATCCTTTTTTGGTAAGACCCGCATAGAAATATGCCACTGACGTAG  
GTAAAGCTAAAGCAACAGTAGATTTTATATCATTCGTGGGTGCAGCTAACTCTCCATGCG  
GTAAGTGTATGATTTTCCGGGGTAAAAGGGCACCTGACCAGTTAGAAACAAAAATAAATA  
GGAACATAGTTTCCAATAAAGGGAACCCAAGGACCATATTCTTCTCCAATCTGAGTTTTGC  
TCAAGTCTCGAATGAATTCGAGGACATATTGGAAGAAATTCTGACCGTCGGTTGGAATGG  
TTTGTGGATTCCGAACAGCTATAGTGGCTGAACCTAATAAGATAGCAATTACAACCCAAG  
AAGTGATAAGTACTTGGGCATGGACTTGGAAACCCCTATTTGCCAATAAAAAATGTTGGC  
CTACTTCCACATCGGATATATCGTATAACGCTTTTAGTGAGTTGATGGAACAGGGTAAAA  
CATTCATATTGCCCTCTGACATAAATAGAACTTAAAAAGGAATTATTTGATTCAGCCAT  
CTCGTATCTCTTCTCACTCGTCTACTTTGAATCAATCGTATATTTCCGATCCCAAGTG  
ATCACATAAATCCCCAGTGATTTTGATCTCTTTTTTGAGACTCATGGATAGTAACCGAT  
TCAATCAATTTATGGAGTTTCCAAAGTGATTGACTTATCCTAATCAACAATTTCTTATAT  
AGCTAGAACTGCCCTCACAATTTGCGGATACATAATTTGTTAAGAATCCATCGGATTGAAG  
CCATAGCGTCATCGTTCGCTGGAATCGAAATATTTGCGAGATCCGGGTCACAATTTGTAT  
CGATTAACAAATTTGTTGGAATCCTCAAAGTGAGACATTCTCGAAGAGCCGTATATTCTT  
CTTGCTGACCAACGATGATTACAATATCGGGTAACCCCGTCATATATTTGATCCCGCCCA  
GATAGGTTTGCAAGTGAGATAATTGCCTCTTCAACATTGCTACATCTCTTTTCGGGAGAC  
AGTTGAGTTTCCCGTATTTTGTTCGATCTCAAGTTCCTGAACCTATGAAGTCTCATTT  
CTGTAGTGGACCAATTCGTTAACATACCACCGAGCCATTTTTTATTAAACATAATGACACC  
GAGCCCTTATTGCAGCTGATGCTACTAAATTGGCTGCTTTATTTTGGTACCAACTATTA  
AGAAGTGTTTTCTTATCTTCTGCTGATCAAAAACATAATCAAGGCTTCTGACAAAAAAC  
GAGCAGTTCGAGTAAGATTTGTAATATGAATACCTTTACGCTTTGAAGAGATGTAAGGTG  
CCATTCTAGGATTCCATTTCCTAGTACCATGGCCAAAATGAATCCTGCTTTTACCATCT  
CTTCAAAATTAATGTTTCCAATATCTTCTGTGATTTCTCCCCACATTTTCTCTCTTTTTT  
TTTATTTAAGAGGTACCCCTGAAATAAATAATTGTTCCGACGGAACCTTCTACCGGAGAT  
TGACCGTTAATACCCAGTCCAAGTCATTAATTCTTTTCTATTCTGTTATATCTTTATAC  
CAAATCAAATGACCAGGACCCTATAGTTAAAAGAAAAGAAATGAATCTGTCAATTAATCCC  
GTAAATGATCGTTCTGATGTATCAGGGAATTTATTTGGGATGCAAGAACCAAATAATTCT  
CTGTGGTGGAAACAAAAGATCTCTCATTTCTCTCCTCGAATGGATTCTTCTTTTGTATTCC  
CAAGGAATGTTGCTGTGTTGCCTTGAGCGGTGCACTAATCCTTTGAATCCGGTACCAACA  
GGCATCATCCCCCAGAACACGTTTTCTTTCAGGCCTTTCAACCAATCAATACGACCT  
CGTAGAGCAGCTTTTGTCTAAAACTCGAGCGGTTCTTGAAGAACTCGCTTCGGATAGAAA  
CTTTGAGTATTCAGAGATGCCCTCGTTATTCCCAATAAGATGGCTCGGTAAACAGATCGCT  
TCTTCCAAAGCAGCCCTGTTTCGTTCCGCTCGCAACAATCCGATTAGTTCTCCAGGTGAA  
AAAACATTAGACATTCATCTTCTGAACCAACACTTTTGATGTTATTTGACGTACAATA  
ATCTCTATATGCCATTATGGATCTGCACCCCTTGGGATCGATAAACCTTTTGGATCTTA  
TTAACCAAAGAGATACGACTTTGCGCTATGGTTAGTTAGCGGCCAATCAAGAAATCCCCAA  
GGAATTCCAAGGATTCTTGTATACGTTTCGTTCCAACCCCTCAACCCCTTTTTCTAAGTTC  
ATCGATATTGAATCAATCGAACGCGTTCTAACACTTGTTCCTACTTTTGAAGACCTTGT  
GTTATATACCCGATCTCGATTTTTCATATATAAATGTAACATAATGTATCTCTTCGTAA  
AGGATTTCTCCCAATGGCCATGAACAGTTGCCCTGGCGTAGCCAAATGGGGCTTAGCG  
GATCTTATGACTAAGGAGTCAACATGAACAATTAGAAGTTCGACTCGATTTTATGTGTGGT  
CCGCATTTGGATATACATACATTTTCAAAAATAAACTGTCCAAGGCTAATTATTTGTGGAT  
GTCTCCTCACAATAATCGTGAGGGAGAAAGCACCAATTCAAATCGAATGGATTAAAAATG  
ATGTTACTGCATGAATCGGGATTATAAATTCTCCATTTTCATCCATTAAATAATATTTA  
AGCCCTTGGAAAGTGTTTGAATTTGTCAAGTAGAAAATATTTCTTTAACAAGATCTGA  
TTATGAGTTATTAATAGAAATAGTAAATGAATAAAAATTCGTAATTTGAGGTACAATC  
CCTAAAGGACCAACGAATTCTTAATGGGAATCGCGGGATCCTCTTAAATTAATTTAATT  
AATTCTTTGTGAGATTTCGAACCATTTGAATAGACCAATTCGAGAACAATCGGATGATAAC  
AAAATTAGAAAAGATGGACATTCTTATTTCTATTTCAGCAACGTACGAATAGTCCCTTGA  
TGTTGGGTAAATGATTGAATCCTCGCCTTGAATAAAAAGGATTAATATTGGTGCGATCT  
GATCCATTATTGGCAATCAATCCTGAACTTGCCATATCATTCTTTTTCCGATATAAAAA  
ATAGAGGACTTCACTAAATCAATTCTTATGAATCTCGAATCAGATCATTGCTTCTACT  
TCAACAAGGAAGCATGAACCTCTTCTATAGAACCATCTCGGTCTTGGTTCCAATTCAAT  
ACTAAACAAGTCCGAATAATTGAAGACTTGTGTGATAAATCCCCGAATCGGTTTGCCA  
TTTCCATAAAGGATATAAATTGACAATTCGTAGTTGCACATTATCCCTTTCCTGCAACGGA  
TCCTGGGGGAAAAGCGTTGCTAAATTTATCCCATCAGCTATTTTCATATGTGACTACGGGT  
CGAACTGAAACAAAATACTTTTTCTTGGTAGGTGTAATCCGTTGGACATAAATCCAATTT  
TTCAATTTTTTGAATTCCTTAGAATTTTTTTTTTCCCGTTCTGGTGGTATCAAGATGCCG  
CAGTGCCGGGATATCTTATCTGTCGCTCCAGGAAAATAGATATCCCCAGAAAAGATTTTG  
AGTTCAATCCTTTTTTTTTTCTCTCCACCCGACCAATCCGCTACTTGGCTTCTTGTA

TTTAAAGCGATTTCGTGTATCTACTCCAATGATACTGTTGTTCCGTACCATTATGGGCGAA  
GAACCGGGTAAGATATGCACTTCTTCGGGAATGAAAAAATCGATCTACTTTCATTTGG  
TATTTTGGCCTAAATTCCTTTGCTCTTCGATACTCAATCAAATCCTCTTTTTTACGATT  
GAACCCACCCCTATAGTCCCATATTTAGTAATTCCTGAAGTCTCTCTCTGTATAGGGGA  
TCGTGCAAATAAGCAAGAATACTATTTCTAGGTAAAACACCATTTATGGGTATTTCAATC  
GAGATACCGGAACGGGGCATTAGTTCCTTTTCTCGTTCCTGATCAGATGGAATGGGATG  
ATAAATCTATTTCTTCGCCTCTTAGCCAATAAATCAGAATTCCTGGGAGAATGGTAGGA  
TATATGAAATTCGAATGACCGTTGGATATGATTCGATCAGGTCTGAATAATCAAGAACC  
CCCCCTTTTTACCGTAAGGATTGCACTAAACAATTTGTGTCTCACTTGATCATTAGTC  
ACGGAGAGGTGAGAAATAGATCTCCGTTCAACAGAATGAACATTCATTTGATCTTGATCC  
TTGTGGAGCGAAAAAGGCACTATACTGGATCTGCACAGAGCTCCTGATAATATCCATAAA  
TGACTTGTTCCTGGGTAAAGAGATGAACATTACCATATTTATATTCAGGTGCATGGTACACA  
TCGGTACTCCAGTGCATTTCTCCCTCTGAGTCAGATAAATATGTTTTCGAACTTTCTCT  
TTAACTTTATTAAAATTGAAAGTGGATGTTCCAGCGCAATCTCAGCAATCACTTGTCTCT  
GATTTCTACATATTGATCATTTTGAACATAAAAGAAAACTTTTGGGTGGAATATTCACATTA  
TGTAAGATATCGTGACTCTCAATAGTTACATACAGGTCTATATAACATAGAAAAGCAGGA  
TGCCCATGACGTGATCGTGTGGGATGAACCAATCCTCATTGAATTTGATTTTTCCCTTA  
AAAGGAGCTCGTACATGTTCTGCAGTACCACCTGTGAATACCTCCACCGGTATGAAAAGTT  
CTTAATGTTAGTTGAGTCCCCGGTTCGCCGATTGATTGACCCGCAATAATACCTACTGCT  
TCTCCTAATTCGACCGGATCGCCATGAGTGGGACTCTGACCATAACATAATCGACAGATC  
CAAGATATACTCCTGCAAAGAAAGGGGGTTCGAATATATATTGGTTGTGTTGAAAAGTT  
ATGAATCGAGTGACAAGTCCAACCCCAATATCTTTATTTTGAGCGGCAATGCAACGTGGA  
CCCATATATATATTGTATGCTAATACACGACCAATTAGTGTGTTGGACCCAAATCTTTCC  
GTCATCCCATTTCAGGACTCACGGAATGCCTCGGGTAGTGCCACAATCTGTTCTACGT  
ACAACAATGTGTTGAACACTTCAACAAGTCTACGCGTGAGGTATCCAGCATCTGATGTT  
CGTACAGCAGTATCCACAACCTCCTTTGCGGGCTCCGTAGCAGGAAATGATATATTCGGTT  
AAAGAAAGTCCTTCGCGTAAATGCTTTGAATCGGTAAATCAATCATTGTCTTGGGGA  
TCCGACATTAATCCTCTCATACCTACTAATTGGTGTACCTGAGATGCATTTCTCTAGCT  
CCCGAAAAGGACATTATATGGACTGAATTAGAGGATCAGTCATCTAAAATTAGGATGC  
ATTTCTTGTCTCAAATATTCATTGTAGCATACCATACTCAATGGATTGGCGTAATTTT  
TCTACTGTGTGATCATTGCCATAATGATGGTGCTTTTCTAAAATGAACTTTGTTGTCA  
GCATCTTGGACTAACCACCCCTTAGAAGGTACTGTTAAAAGATCATCAATTCCTAATGAA  
ATGGATGTAGCAGTGGCTTGCTGGAACCCAGAGTCTTTACTTGATCCAGGGTGTGCGAT  
GTATATGCCATTCCGAAGTGATCTATTAATCTGCTAATAAGTCGTTTCATGGCAGACCCA  
TCTATCGCTTTATTGTAAAAGACAGATCAGCCCATCTGCCATAAGTACTTCTCTATTC  
CGCTGAGTAGGATTGCCAATGGGTTGAGTCAGTGATTCGAAGACCTCCTTTACTGGAT  
CTCGATTCAATGAGAAATTAAGGAATTATGATTCCAGTTGAACCGGAGAGATCCAAATTC  
CCGCGGTATTACATAATTCCTTAGCTTAGGTACCGTATGAGTAGGCCTGACAAAACCCCT  
GTATGGCTTCTTCTATTTCTCGAGAAAAGAAATAGGACCAACAGTGGTTCGGGTGTATA  
TACAAAGGGTTTGTGTTTTTTATACGTCTTACTATTAGATAGTCCCCATAAAATTCATGAT  
AGGTACCCAAAGATTCATATTGAACTTCGACAGGAAGTCTCTTGAGGCAATGACACGTT  
GATCTAGTCGCGCAGCCGAAGCTTCCGCTTCCAAAGATAAAGGTACATGAACAGCCATTTGAT  
CCCCATCAAAGTCTGCATTTGAATCCTTTACGAACTAATGGATGTAAACAAATAGCACGTC  
CACCCCTAAAATGGGCTGGAACGCCTGTATGCCTAATCTATGCAGGGTGGGCGCTCTAT  
TCAACAATACAGGATGCCCTGCATAACTTCTTGAAGTATTTCCCATACAATGGGTTCTT  
TTTCCCGAATTTGACTTTTAGCAATTCCTATGTTAGAAGCGATATGTCGTCTGATTAAC  
CACGAATGACAAATGTCTGAAAAAGTCTATTGCTATTTCTCGAGGTAATCCACATCGAT  
GTAATGAAAGCGAAGGGCCACGACAATGACGGAACGCCCCGAATAATCGACCCGTTTAC  
CAAGTAGAGTCTCACGAAATCTTCCTTCTTGCCTTCAATTACATCTGAAAATGACTTGT  
AACTTTTATTATGACCGTCTCTCATTGGTTGTCCGCGGATCCCATTTATCAAGAAGTGTAT  
CCACGGCTTCTTGTACCAATTTCTCCTGACACATTACTAATCCCCCTGGCGTAGATCTAC  
TTGTTGTTAATGAATCGGTAAGAGTATTGTTCCGATAGATAACTCTTCGGTAGAGTTCAT  
TAATATCCGAACCTCATTATGTTTACCCCATCTATCTGAATGATTGGCTCAACTCGGGAG  
GAAGAACTGGTAATAGGCACAAAACCATCCGTTCTGGTTCTACATTTGTTTGAATAAAAT  
GCTTAGCTAATTCATGCGTCTAACCAAAAATCCTTTCTTCTTCCAATTTTTCTATCTT  
CCCATTCATTCCAGTGAAACCTTCTTCCCCTAATTCCTTCCATTCTACCGATGAATGAT  
CTATAATAATTCGCAATCCGGATCGGCTAATTGTTCTCTGATAGCACCTGCCTCAGTAG  
AGATTTCTCGATTTCGAAATGTATCGAAGCCTGGGGTAGTAAAAAAGTGGGATGCTGT  
ATTTCCGGGATTGGATTCAGATTTCGAATGAACCTCGTAATCGCAAGAAAGTCGGTTTTT  
TAGCTATGGGCTGGCAAAAGAAAAATTGGGATAGGTTCTATAGGATCCCCCTTCAAA  
ATCGGACGTGATGGTTTTCTCTCATCCGGCTCAAGTAGTTACACCAATAAAGAAAGGGG

TTCTCCACTTTCAAATTTTGTCTAGAAAATCCCAGAAAGATCTACTCCTTACTCAAGTT  
CCCAGTGAGGACCAACAAAAATATTTTCATGGATTTCATCCTTCTCTTTGACTTTTCTGAATT  
ACTTATTCAATTACGATAAAAAATGGAATGTCAAATTATTGAGTAGTCTACTTCCCTTCGA  
ATGATAAAATCCCCTTAAATGAAAGGAATACCTTGGAATTAATAAGGGATTTACTTGTCTA  
TGTATTGTTTCATTTCGATCTTTTAGGTCTCCACTTCACCTCGACGGTTATGCCATAATGT  
CCCTTGAAGCATATATGCGATGGATGGGCTCCTGTAACCGTGTCAATTTGTTTATTTGA  
ACAGAATCTCTTCTAAAAGAAATAGAACGTCTAATTCACGAAAGAGTTTTTTTTTTT  
TCACGAGGTACAACCTGTTATATGTTACGGAATCGACCATGGATCAATTCCTTTCATTT  
GGAAGTATTGAATACAACCATAAATCTGAGCTTCATATTCCTCCTCCCAAGATACATGTC  
AGAGTCAGGGGCATCCCCATCGAATTGAATGGGATGACAGTTTCTCATTTCCGAATCTGTA  
AAATCCTAATTTTCGATCAAATCACACATCGCAGTATACTAGGCCTTCTAATTCCTTAAGG  
GGTTTATCTAAAAGATTTCGCGATATAACTAGGAAGACGTTTCAAATACCATACATGAGTC  
GCTGGACATGCCAGTTTGATGTATCCCATTTCGATATCTTCGTATCCGAGAATCAACAAAT  
TCAACTCCGCATTGTTTCAAAAAATTCGGATCTTCTTTTCTCTCCGATCACTCGATAA  
TTTCCACAAGCAAAATTCGCTTTTATAGGTCCAAAAATCTTTTCAAAAACAATCCA  
TCCTTTTCCGTTTATGCTTTTGTAAATGAAAAGTATAGGGTTTTGTACCTCTCCAACC  
ATCTCTCCATTAGGTAGGATTTTGGTGGCCCAAGCACTTATTGTTGAGGAGAACTGAT  
CCAACCTCGAAGTTGTTGATGTTTATATCGGTTCGATCATAGAAGAAAAATTCGATTCATT  
TCGATCAAACCTTCTCTGTTAATCTGGAAGTTCTTCTCAGATACAAGGAAATGATTCA  
GTTCCAGAGCCAAAGATCGTAGTTCTCGAACGAGCAATCGAAAAGATTCTGGCGCATCCT  
CGGGTTTAAAGTATTGTTCCGCCAATGATTGTAGTTCCAAGTACTTCTGACGAGCTCTAA  
TATGATCCGATTTATAAGTAAGCATCTCTTGTGAAATATGAGCAACACCAATCCCTCTA  
GAGCCCAAACCTTCCATTCTCTACTCGTTGTCCCCCTTGCTTGGCCCTTCCCTAAGGG  
GTTGTTGTGTAACAAGTGCATAATGCCCGCTGGAACGTCCATGGATTTTATCATCAACTT  
GATGAATTAATTTTCAGGATATAGGACTTTCCTATTATAACCGGTTGTTCAAAAGGATCTC  
CTGTTCTTCCATCCAATATTCTGCTTTTCCCGGATACTCGGGTTCAAATACCCACGGAT  
TTGCTGTTTGCTTACTGGCTGAATATAATTCAGGAAACACTAGCTTCTCAGAGCCCCCT  
GCTCATATCTCTCATCAAAGGGTGTCTATCTATAATGTCTGTCCAACAGGTACCCCGCTA  
AACCGAGCGAATTCAAATATTTGTCCACATTCATTTCGCGAAGGTACTCTAATGGGT  
TGAAGACCATATCGACCGGTGTTCCAGCTTGCAAATAAGGCATATCCTGTCTAGGCAAAA  
TTTTGGAACGATACCCCTTATTCCCATGTCTTCAGCTATTTTATCACCTACTTTGATT  
CACGTTTCTGTAAAATATATACAGCAATCGTTTCTGGATTATAACTGGAACCCCCCTTTT  
TCTGGATCCATCTCACATCAATAACTCGACCCCTTCCGCCTATAGGTAGTTTTAGACAAG  
TTTCCTTTGCGGTGGATACCTGAATGCCAAGTATGGCTCGTAATAATCTATCTCCGGGG  
CATACGATGATTCTTTCGCCGCTGAGGCGTTAATTTACCCACTAAAAATACACCTCTTT  
CTATCCAAGATCCCAGCATTACAATTCATTTTGTCTAAATTGCGGAGTAAATGGGCTT  
CTAAATGCGGTATTTTATAGTGATTCTTTCGGGGCTTGCGTTGTACATGAGTCTGAA  
TTTCATATTTCCGTATGTGAAAAGACGTATAAATATCTCCATATACCAGACGTTTCGCTAA  
TGAGTACCGCGTCTTCAGAAATTGTAGCCTTCCCATGACATATGAGCTACTAATACATTTT  
TTCCCAAAGTAAGTTACCGCCAACTGTAGCCGCGCCGTCCGCTAAAAATTTGTCCCTTTT  
TAATGCATTTACCCCGCGGAGCCTGAGGTTTTTGATGCATACAAGTATTTTGTGGAAC  
GTTGATACATAACCAACGGAATGCTTATAGTGTCTCCATTACCCGATAAAACGATCTGT  
CCGTATCGGTATAAATGATCTTTCCTCGTGTTCGGCTATAGCCGAAACCCCGAATCTA  
GAGCCGCTTGGCATTCCAACCCAGTTCCAACAATGCACTTCTCGGATCGAGAAAGCGGAA  
CTGCTTGACGCTGCATATTAGAACTCATTAAGCCCGATTTGCATCATATGCTCGATAA  
AGGGAATGAGGGAAGCTCCAATAGAAAAATATTGGAAGGGA AAAATGCTTCGAAGATGAA  
TCTGTTCCCATGCAATAGTCAAGAATTCTTGACGGTATCCGGCTGGAACAACCTGTTCTT  
CCTGAATACCCCGATTCAAAGCCAAAGAATTTCTGCGCTACCATAATAGTATTATCTC  
TACTTGGTGATAAATAAACCATCTTTTTTGTATCTCTCAGATATTTCAAAAACGGACTCT  
CTATAGACCCCCAATGACCAATCCTCGCATGAATAGCTAAGGATCCAATAAGTCCAACAT  
TGATTCCTTCGGACGTGTCAATTGGGCAAAATACGTCCATAGTGACTAGGATGGATATCTC  
GTATCCGAAACTAGCAGTTCGCCCTGTTAATCCTCCAGGACCCAAATAACTCAATTTTC  
GCCCATGAACATTTTGTGTCAATGGATTAGTTTCGATCCAAAACCTTGAGATAAAGGGTGTA  
GGCCGAAAAACGATTCTAAGTGGTTGTTAATGGAGTTGGAGTTACCAAAATATGAGGAG  
TCGGTATCAATTTATGCCTGATTGCTCCACATATAGTTCTCGAACCGCATTTTCTAAAC  
GAACCAGAGCCAAATCCGAATTGATCCTGTAACAGATCTGCTACAGAACGAATACGTTTAT  
TTTTCAAGTGATTTCATGTCGTCAAGTGTGCCCATTCCAAATTTTCATTCGATCAAATGAT  
CCACAGACGCCAATAGCTTTTGTGGTAACAAGAATGATTGTTTCGGAGGTATATCAAGAT  
TCAGTCTCCGGTTCATATTTTCGTCGACCAATCCTTCCTAATTCACATCTTTGTTGAAAAA  
ATTTCTTTTGTAAATCCTTACATAAGGACTCAGAAAAATACCGATCCCGCCTACACAAG  
CAAATGTTGATAAACTCCAAAATGGCATTTTCCCTTGACCCAATCTTTTTTTTCTCCT  
TATGATTCGGGAAAGACAAGAAAAATTCAGGGTAGCAAACATTATCTAGAATTTCTCTTA  
GATTCGAACCCATAGCCGATGATGGAACCTAGGATAGATATTTTGTTCCTACTCACAC  
GGGCCATATCCTTGCTTTTCTATCAATCTCTAATTCGATCTTCCCCCAATCTGATA  
TTATGGTGCCGGTATAGACAGAAATTCGCTATGGTCCAATTCGAACGGTAATAAATAC  
CGGGGCTTTGCAATATTTGATTGATTACAATTCGTATATTCCTACTACTAGAGAGTTTC

CCAGGGAATTCATTAGAGGAATATTTCCAATAAATACGGTTTGTCTTGCATATCTCTAC  
CGGTTTTCCAAATTAATCCCGCGGATACATATAATTGAGAAGAGTATGTGAGTGATTCAT  
ACACAGCATCTCTTTCTTTATCAAGGGCTCTGCCAATTGATATGTTGCCACAAATAATT  
GAAATTCAAATTTCTGGGCTGTATCTTCAATTTTGGAAACTATGAAGTTCTTCCATCA  
AGCCTTGATCAATGAACCTACAAAATCCGTCAAATTTGATCTGACTAAACCCTGGTATTG  
TATACATTCCCTCATTTCCATCCCGAACATCTAAGTTTCCGTTTATCGAAAAATCC  
AACTATTGGCTCACTCTCGTTGAACCATATAGATTGATCTAGCAACGATGGAATGTATA  
TTTTGCTCATTTGAACAACATGAAATTTTATCCAACCCCATATACATATATACATGTACT  
AAATACGTATGAACGGAGGAATAAAAAAATGTGACTCAAATTCGAATTTGCGACAGAT  
ACAAATGGAAATGAATTTGATAAAAACATTCTGGAAACAAAATTTCTGCCACTTAGACTTAT  
GGAGTCTTGATAGAATATCAAAATAGATCCAATTTCTACCTTATGATATTACGATCAGA  
TTGGGTACCATAAATGGATTTCGGAATTGAATCTGTTCTCTATGAGTGAGATAAAGACAGA  
ATAATCAGGAACCGTCTAGAGTTGACTTTGATTTTAGCACTTAATTTATTTTCATCGATTC  
CGTTGTTCAAAAAATGATTCGCAGAGAGAAAAGATATTTCTACCCATTTGTTAATTAGTA  
GAATACGATTGAAGTGCCTAAGAGAAGTCATATTTATTAAGTACATGCAGATATAACTAT  
CTAGCTATCCGTATATCCCATCTTTTATCGAAGTTCCCTTGAGGCAACATAGGTCGTGCT  
ATATCCAAATTTCTATTTTATATTCATATATTTCAATGAAAAATGCAAGCAGCAGATTT  
CCTAATAGGAATATGTAGATAAGATACCTGACTAGGTATCCGTGTAAGAATTTCTGTTCT  
GGGGTTTACATATACACATAATTGTTGTTATAATTGAAATTTGAAAAGGATTAATTATGGA  
AAAGAAATTGAGACTGATTAGTGTCTGATATCAATTTGATCTCCTTATGTCATTAAAGGAAACC  
AAATTGGAGATCAAAACCAAGAACCATTTCATGAATTCACAGTCATTAATGCTTCCAATT  
TGCTCTGAATTTTGGATTCTGTGACTGGAAATCCATTTTCTCTTTCAATAGAAAAGGG  
GGGAAAGCTTTTATTTAGGTGTTGTGTGTTTTGAAATACAATCAATCTAAGAGAACAACA  
GGATCCAATCAAAAAAAGAAATGGTTTCAGCAATTTCCCGAATATTTCCATCTATATCT  
ATTTTGTATCGTTTTTGGCGGCATGGCCGAGTGGTAAGGCGGGGACTGCAAATCCTTTCT  
CCCCAGTTCAAAATCCGGGTGTGCGCTGATTAACAAAAGACTCGGAATTTCTTACCCTACT  
AAAAGAACTCACAAAATTTCTTGCTGGCAGAAGCAGAGGTAAGGGGCGGGGACTG  
TCGATACCCAATTTTAAAGATCGGGGGTTGACTTTCATTTATTTCTTCAAAAATCGGGG  
TGTGACCCAAACCTGTACCATACCAATATGAATTACCAATATAAATAAAGAAATACAC  
TTAATTACGGATTGCTGATGCGTTTCAGGCCATTGATTTGATTTATCAATCGAATCAAATC  
CATAGTAAGATTCAATTTGTGAGATTGAGAACTACGAAAGTCAGGGACCGTAATTCCTGT  
ATCCAAAGGAAGGTTCTTAAGAGACTGTAAATCCTTGCTCCTAGGATCCAAGAAGGGGTT  
CTAGGAAGGACTATAAATACTTCCATAATTACCTTACCCTACTAGTGTTTACTGACTGAGT  
CTTGAAGTAGATTGGGTAGGCTGGTGGGAATCCAATTAGGAGTTGTGGAAGAAGTCAA  
GATACTTTGTATCCATACAAACTCATGAGAGTCTCTGAGTGCTCAGGTTTTCAATTAATA  
TTGTATGGGTGATTGGCTTTTATAGAATAAAAGTGGAAGAAAGTCTTTCGTTGGGGTAA  
CCCCGCAAGAATGTAAATGGGTGTCTTCCAATTTGTTTCACATTTTCACAGAAGTAGAGAC  
AGTAAGGCTTAGATGGGAAATTAGGAGTATGTGATAGATAGTTATATATCTTGATGGTAT  
ATTTTTTTTTTCTGCTTTTTGTTTATGAAAGGCAACAATAGGTCTTACTATTCTTACATA  
TTCCATTAGTCACATTTCCCTTGAGACTTCCAAGGGGCAACTGTGTATCTTGCTTGTACTT  
AGTGCTTTCCGATTCCACCAGAAATCATATAGGACTTGTTACGGGTGATTCATTGGAT  
TGTTTCATCAAAAAGTTAGGTCAAAATCCCATTTTGACTCTGCACATTGATTCCACTA  
TTATTAGTGATCAAGAATGGAATAATTCCTTCATATTCATAGAGATAGGGGACATGATTC  
ACATGGATATAGTCAGTCTCGTTGGGCTGCTTTAATGGTAGTCTTTACATTTTCCCTTT  
CACTCGTAGTATGGGAAGAAGTGGACTCTAGGGGTACTACTAATTGAGTTGAGTCATCG  
AATTGTATCAATTGTTTATTAGATCGTTCTGCGAATCGCTTTTAAAAAATCTCTCCA  
ATTTAGAAATTTCCACAGGAATCCAATATGAATAAGAACCTTTGGATCAAACAAATATTTT  
AACGACTTGATTTCCCGTGTTCGTATTTGCAAACTCAAGGGATACACATGATGGGAATT  
TTTTCCAACCGAATTCTTTCTAAATATTCTATTTGACAAATCGGCCCTTACTAGAATTA  
TGCATATTACAATGAGGAGCAACCAACCCCTATTTTTTTTTTGATTTGTTCCCTTTTCT  
CTTTGCTGTTCAAAGAGGGAACCGTTCTTCTATTACGTACGTGGATATGTACTTTCTACT  
GAGGCGACATAGACATAGTCGTTGTGCCAAGAGGTAACGCTTAATAAGATCTTACTTT  
CGTTGGGTATGCGTACTTACCTTTTTTACTCCTAGGAATCTTATTTATGCTTTATCGAC  
TCGTCTCATGTATGTTCAAGCATGAAAAATCGGTGGGGTCTACTACATCCTTTTCAA  
ATCCGAAGAAGTTACTATAGAACTTTTGGATCATCCGTTAACGGATCAATCAATTACTT  
CTTCGTAATGTAAAAAAGGCTTGGTTTTCTTTTATATAATATATGCCCATACTAGTCT  
TTCTCCATTGATTCTTTCAATGGATCCCGGATCCATATTGAAAAATATCAGAAACCCAG  
GAATTAGAAAAGTTGACGTTTCGATTATTTAGATTGATCGGGATCAATACAATTTGACGT  
AACAAAGAAATAGAATTGGAGTGCTATTTACATGTACATATATAAATGTGGGTACATATT  
GTGGATTGATCTATATCAAGCTCATACCTTTCTACAATAATAGATAGTGTGGTAGAAAGA  
ACTATAATGAACCTTTCTACCATACTATCTATATACTGCTGACTCCAACCCGACCATTT  
AAGACTTGAATTTGAATCCCTTTCTTTTCATTTCTTCAATCGTTGATAAGAACTAATAAG  
TCAAGTTTCAGTCAAATTAATCACTTTGACTGACTGTTTTTACGTAGATTATAAGTAAAA  
AAGCAGTAGGAACATAGATGAACAACGCAATAGCAATAAATGCTAGAAATTTGACTTCCA  
TAATCTCATCGTTTTTTTTTGTCTTCGCAATAACTCGGGATCTAATCCCATAGAGATGATA  
AGTCTTTCTCCTGTAATTCATAGGATAGATTGTATCCTGATGATACTTAATCGTATCA

ATATCATGAATAACAATATCTGATCTATCAAATCGATTTCATCGTCGAGAATTGAATAGTA  
TAACATAGGAAGATCTTTTATCCATACCGAATCCAAAATTGGATTCCCTGGTCCAATCAAG  
AATCCCATTGAATTTCTCATTTCCACTCTTTCTTTTTATAACCTGCCGTCTTCCTTATA  
CAATCATCTGGCCGGCGTTCCTATTGGTCACAAACCCAAACGGTAGGGATGAAATGGAAAA  
AGGAATGAGTTAAGTTCTAAACGAAGTTTTTGTGAAGATCTACTCTTTTGGGAAGACAGA  
GAAGTGTGATAAAGATTGGTCCGGTAGAAAAGATCTAACAGAATATTCTATTCTGACAAA  
TTCATTTATTTATGATTTTGTTTTTCTTCGATGGGGCCATTAAAAAGGAAGAAAAAA  
AAAAGGGGGGGGGTAGGTTTCATCTGAAAAGTACTCTGTCGCTGTGGGGTAACTAGTA  
ACTATACTATATTACTATATTAATTAATTAATTCGCTATCGTACAATAAACG  
AATACAATTTGTGTATGTGCTCCCGGGAACGTATGAGTACTCTATTACATGGACCAGGA  
GCAATCGAAAAAGACAGGCCCGTAGGGTCTCTCTTGAAATCTGAATAGGGCGATACCGCC  
GATCAATCTACATATGTCTCTCCCATCAATCGGTACTAGTTGAAGTAATTGAAAGTCCC  
ATATTTGTACGATGAGAAATGCGAAACGAAAAACAGAAAGAAATAAGGATCCCCCGGG  
ATTAAATCCTGCTCCTTGTCCCCCTCTTCGCAGAAAATGGGGAGATGAGTTGATGGATT  
CATCGGATTCTAGGTCGGGACTGACGGGCTCGAACCCGACGCTTCCGCCTTGACAGGGC  
GGTGCTCTGACCGATTGAACTACAATCCCGGGAATGGGGTGACAGCATACATACATAT  
TCTTATAATTTTCATTGCAACCCCTTCTTCTATATTAGATTGAAAATCGACATCT  
TTCTGTTACAAGAAAGACGAGTGATATACTGATATACATGGATATGGACTATAGTGGG  
AGTGACACGGATTACTAGTAATCCTGTGGTTATTTTATTACCCAATCAATTGATAATCCA  
TTTTTCAATGAAAAAAGAAAAAGGACTCTTTATTTTATCTATCAGGCATTTTCATTTAT  
AGAGGACAAACTGGTTATATCATCCTCATGGATCGGCGAATTGTTGGGCCGAGCTGGATT  
TGAACCGCGTAGACATATCGCCACGAATTTACAGTCCGTCCTTAAACCGCTCGGGC  
ATCAACCCAGGAAGAATCAATCTAGGCTTATGATAATCCATGATCAACCCCTTTTCGT  
CTTACCCCGAGGGGAAGTCGAATCCCGCTGCCTCCTTGAAAGAGAGATGTCTGAACCA  
CTAGACGATAGGGGCATACCCGCCGATCGCCATCATACTATCTATGCTCATAGTATGAG  
CAGTTTTTTGAATTTGTCAATATACAATATATATGACTAGATCCGAAGAATCTTTCTTGC  
TTACAAGATTCCATAGAATGGAATTTTGGGATTGTTGATTTCATGAACCATCCTATATATA  
AGAGAGGATAGGATCCTTCAGGGAGTGATTTGTCCGACAGAAAAGGGCAAACCCCATTC  
CATTTCTTTTCATTTTCACTCGTTGATTGCTTCGTCTGTTAAGGTGAGATATGCCTATCTCA  
CACTAACACTAACTAAGCCAGGAAATTCAGAAACGATAGAATTTCTTTTTTTGAGGATC  
GACGAATAATCGAAAAAGATCTTTTTTTTTTTCTAATAATTAATTTAGGGTACGAGTC  
GAATCCCTTCATCACATGATTTCGATGAAATATCTTGGATCTATATCGAATTGGTACATGT  
ATCAATCAACCAAGTGAATCTCGTCCGATGAGTCAATAAAGCAAAGCAATTAGGAGCG  
GCCTGAAACAATTCATGTCATTGATATTTCTCAAATATAAATAACTAAAACCTTCCTAGG  
TAAATAAAATTTCTTGTTCCTGAATGAGCCCTATGTATACATGTACATTATATACATAT  
ACATTGTAGTACATACATACATGATAGTACTATAGTAGCTAGTGGTTAATTCA  
TTTTTTGAAGAAAATGGGCCCTTTTAACTCAGTGGTAGAGTAACGCCATGGTAAGGCGTA  
AGTCATCGGTTCAAAATCCGATAAAGGGCTTTTTCTACGAAGCTCCAGTCTTAGTCTTCAT  
TTTTTCATCGGAGAATAGAGATATGTTGATATTTGTAATAAAGTCAACCCATAATGAGTT  
ATCATTCTAATGAGTTATAGGTATAAAGTGAACAGTTGTTTATTATGATTATGATAAGT  
AATCGCACTTAGTAGGAGGACTACTATGTAATTCACCTACAGGCTATACCCCTCCTCATAT  
TATTCCTATTTTTGGTCCCTGGGACATAGATATCTAGATACCCAATCCAAATGTGGAATC  
GCCAAACCAAAGTATTCCCATTTCTCTATTGTTCCAATCAAATCCCTCGGAAAAATAGA  
AATCAAGAAAATCAAAAAGTAAGTGGACCTGAGCCATTGAATCATGACTATATCAGCTAT  
TCTGATATTCAAATTCGATAGAGATGAAATTGTAGAAGCGAATTTTTCTTTCTTGGAC  
CACGCAATAATTTGTCGATATTTTCAGATTGAATCTTCTTGTTCCTGGATGCTCCATAGGA  
ATAAATTGCTCTTCTTCTTCTCCACAGAGATACGTTTATTCCAAGTCACAAGAGCAATCT  
CTTTTTCAATACCTTTCTTGTATTCCAGAAAAAAGAGTTTCTATCTATATAGGATTTA  
GATATAGATATCAAATCATGGCTTCAGGTACAAAATATTTCCATATTGATGCATCAGATA  
TTTTTGTTCCTCCAATGCAACGGAACGAGTGCGATAAAGGAGGGATTTTGATTTCCAG  
TCTCCCTATTTAATTTAGGGGGCAGGGACAAAAAATAGGGTCCTTTTTTTCTGCCGGAT  
ATAGGGTAATAAAAAAAGTAAAGAGGGAAATATTCGAAGTTTATTTTTTGGTTCGAC  
CCGCGAAAAGATATACTCTGGAATTTTAGATTTCATTGCAAGGAAATATAACAAAGAAGAC  
AATAACAAACAAAAGCAATCAAAAAAGGAAGGAGTAAGAAATTATATATATATATAGGA  
TACTGTAGTAGTTTAGTATACATAAAATTACGAGAATCCATAAAGATATTTATTGATCT  
TTTCTCAATAAGATCCAGAACACGAATACGATTAGCTTATGGAATGGCGAGCTAGATCT  
GGGGAGCAACTGATAACGAGAGAAAGGATCGCTTGTTCCTCACAGTTATTTCAAAAAAT  
GGATCTGATTGATGGGTATAAGACAATTCAGGGTTCGGATGGTTATTAAGAAATAAGAAAG  
GAATAAGGAATAGGAAGGAATAATTGAATCGAACTCATGGATTACCTAGGTTGGTTTCT  
GGCCCAATAGAAAGGAAGGATTTGTATCTTCGAAACCCATTGGATGGAAGGCGCAGTGGGA  
CGAGGAATCGTTCATAGATGACCGAACCATCGTATGCCCTGAGAATGATATGAGGTGTTC  
GGAAATGGTTGAAGTAGTTGAATAGGAGGATCGATATGACTATAGCCCTTGGCAGATTTA  
CCAAAGAAGAAAAATGATTTATTTGATATTTGATGACTGGTTAAGGAGGGACCGTTTCG  
TTTTTGTAGGTTGGTCTGGTCTATTACTCTTTCTTGTGCTTATTTTCGCTTTAGGCGGTT  
GGTTCACAGGTACAACCTTTGTAACCTTCATGGTATACCCATGGATTGGCCAGTTCTTATT  
TGGAAGGCTGCAATTTCTTAACCGCTGCAGTTTCTACTCTGCTAATAGTTTACACATT

CTTTGTTGTTACTATGGGGACCTGAAGCACAAGGAGATTTTACTCGTTGGTGTCAATTAG  
GCGGTCTGTGGACTTTTGTGTCTCTCCATGGAGCTTTTCGGGCTAATAGGTTTCATGTTAC  
GTCAATTTGAACCTGCTCGATCTGTTCAATTGCGACCTTATAATGCAATCGCATTTTCTG  
CTCCAATTGCTGTTTTTTGTTCTGTATCTTGATTTATCCACTAGGTGAGTCTGGTTGGT  
TCTTCGCGCCTAGTTTTGGTGTAGCAGCTATATTTCGATTCACTCTTCTTCCAAGGGT  
TTCATAATTGGACGTTGAACCCATTTTCATATGATGGGGGTTGCTGGAGTATTGGGCGCTG  
CCCTGCTATGCGTATTTCATGGTGCTACTGTAGAAAACACTTTATTTCGAGGATGGTGACG  
GTGCAAATACATTCGGTGCTTTTAACCCAACTCAAGCTGAAGAGACTTATTCGATGGTCA  
CTGCTAACCCTTTTGGTCTCAAATCTTTGGGGTTGCTTTTCCAATAAACGTTGGTTAC  
ATTTCTTTATGTTATTTGTACCAGTAACCGGTTTATGGATGAGTGCTCTTGGAGTAGTCG  
GTCTAGCTCTGAACCTACGTGCCTATGGCTTCGTTTCCCAGGAAATCCGTGCAGCGGAAG  
ATCCTGAATTTACAGACTTTCTACACCAAAAATATTCTCTTAAACGAAGGTATTTCGTGCTT  
GGATGGCGGCTCAGGATCAGCCTCATGAAAATCTTATATTCCCTGAGGAGGTTCTACCCC  
GTGGAAACGCTCTTAAATGGAACCTTAGCTTTAGCCGGTCGTGACCAAGAAACCACTGGG  
TTCGCTTGGTGGGCCGGGAATGCACGACTTATCAATTGTCCGGTAACCTACTCGGGGCT  
CACGTAGCCCATGCCGGATTAATTGTATTCTGGGCCGGAGCAATGAACCTATTCGAAGTG  
GCTCATTTTCGTACCAGAGAAACCTATGTATGAACAAGGATTGATTTTACTTCCCCATCTA  
GCTACTCTAGGTTGGGGAGTAGGTCCGGGTGGGGAAGTTATAGACACCTTTCCATACTTT  
GTATCTGGAGTACTTCACTTAATTTCTCTGCAGTCTTAGGCTTTGGCGGCATTTATCAT  
GCACTTCTAGGACCTGAGACTCTCGAAGAATCCTTTCCATTCTTCGGTTATGTATGGAAA  
GATAGAAAGAAAATGACCACAATTTTGGGTATTCACTTAATCTTGTTAGGTATAGGTGCT  
TTTCTCCTAGTGCTCAAGGCTCTTTATTTTGGAGGCGTATATGATACCTGGGCTCCCGTG  
GGGGGAGATGTGAGAAAATGACCAACTTGACCCTTAGCCCAAGTGTTATATTGGTTAT  
TCACTAAAATCCCCCTTTCCCTTGGGGGAGAAGGATGGATTGTAGTGTGGACGATTTAT  
AAGATATAATTGGAGGACATGTATGGTTAGGTTCCATTGTATACTTGGTGGAACTGGC  
ATATCTTAACCAACCCCTTTGTTTGCATGGGCTCCCGCGCATTTGTATGGTCTGGAGAA  
GCTTACTTGTCTTATAGTTCAAAGGCTTTATCTGTCTTTGGTTTCATCGCTTGTGTTTC  
GTCTGGTTCAATAACGCTTATCCTAGTGAGTTTGACGGGCCCACTGGCCAGAAAGCT  
TCTCAAGCTCAAGCATTGACTTTTCTAGTGAGAGACCAACGCTCTTGGGGCTAACGTGGGA  
TCCGCTCAAGGACCCACTGGTTTAGGTAAATATCTAATGCGTTCCCGACCGGAGAGGTC  
ATTTTGGAGGAGAACTATGCGCTTTTGGGATCTCCGTGCTCCCTGGTTGGAACCTCTA  
AGAGGTCCCAATGGTTTGGACTTGAGTAGGCTGAAAAAAGACATACAACCTTGGCAAGAA  
CGACGTTCCGCGAGAATATATGACTCATGCCCCCTTAGGTTCTTTAAATCCGTGGGTGGC  
GTAGCTACCGAGATCAATGCAGTTAATATGTCTCTCCTAGAAAGTTGGTTAGCTACCTCT  
CATTTTGTCTTAGGATTCTTCTATTCGTGGGTCATTTGTGGCATGCGGGAAGGGCCCGT  
GCAGCTGCAGCAGGATTTGAAAAAGGAATCGATCGTGATTTTGAACCTGTTCTTCCATG  
ACCCCTCTTAATTGAGACAGGAGATCAAATGCATGAAGTAGGAATCCATTTGATTCCATT  
ATACATATTAGGTTAAGATCAGGTCATATTTAAAAAGTATTCCCTGTTTTTTCTTTTCA  
TTCTATCTATTTTTTTCTGGCTCGGCTATCCCACCTAGCCGAGCCATTTCCTTTATGAC  
ACCGGGCCAGGCCATACCAATAAAGAAACAAATCGATTCAACGAGCAAAAGGAGAGAGAG  
GGATTGCAACCCCTCGATAGTTCTTTGTTCCGAACTATACCGGTTTTCAAGACCAGAGCTA  
TCAACCACTCAGCAATCTCTCCAAGAGACAATCTCCATTTTATTCCTCCGAATAGAACAT  
GGCCATATGGGTTGATACTCTAACTATCTGTAGAAACATCCCAAGTGCGAATCTATATTT  
CGACATATCTATCTGTCTATAGATGCATGATCCAACATGCCCATTTGGGAAGTCAAAAAA  
AAATTCCTGATTCCATGTCCGAATAAAATAAAGTGGGACTAAGTTCGAAAGGATCAATA  
AATTCATGGTCAAATCCCGTCATGATGCATTATTTCAATTTTGACTCTGAGAGAGGGATC  
AAATGGTATAGTTTCATTTGTTGGTAGCTTGGAGGATTACAAGCATGACTATTGCTTTCCA  
ATTGGCTGTTTTTGCATTAATTGCTACTTCATCAATCTTACTGATTAGTGTACCCGTTGT  
ATTTGCTTCTTCTGATGGTTGGTCAAGTAACAAAAATGTTGTATTTTCTGGTACATCGTT  
ATGGATTGGATTAGTCTTCTGGTAGCTATTCTTAATCTCTCATCTCTTGAACCTATTC  
GGTCTTTCCCGGATCAAAAACTGACCCCTCCCCAAATCTTTTCGGATTGTAAGACACAT  
TAAAATGAAATATGAGTCCAAAAATAAAAAATAAAAAATTTGGAGGGAGGGGTCAAAAAATC  
ACTTCTTGAATAAAAAAACGAAGAATCTAATAATAATTGGAATCTTCTTAAGTATCTGA  
CCCTGTCTGTACAAATGGGATCCAGACACATATATGATATATCATATATGTGTGGACATA  
TACGTGTGTATCAGGAACGAAGAAAGTGC GGATATGGTCAATGGTAAAATTTCTCTTTG  
CCAAGGAGAAGATGCGGGTTCGATCCCCGCTATCCGCCCATGGTAAAGTAAGGTAATATG  
ATAAATGATTTAGGTATAGTTGACCACGATAGGGGAGTGGTTCTATTCTTCCCATCCCAA  
AACCAAAATAGCCATTGGTTACTAGGTAACGGAATCGCACCTAAAAATGTTTTTTTGA  
AAAAAAGAGATGTTGCGGAGACAGGATTTGAACCCGTGACCTCAAGGTTATGA  
GCCTTGCAGACTACCAAACTGCTCTACCCCGCGCTGAAAACTAATGGACGAACAAGAATT  
GGATGTGCCCCCATACCATATTCTATATAAATAGAATAGCCATTTATACAGAATGGTAA  
AGGGGGCCCTCTATGATCATAGCTCATAGAGATAAATAGAAATAGGAAGAAGGGGTATT  
TTTATCCTTACCAACTTGATCTTGTGGCCCCGGCAACAAACATGCCTGAACCTTTTCGT  
GAAGTATGTGTCCGATAGCCGAAAGTCTCGATAGCTAGCTCTAGGTCTTCCGGTCAAAA  
AACACGTCGATGAAGACGTGTAGGTGTACTATTACGTGGTGGGGATTGCAATTTTCCAT  
GAATTTCCCATTTGTCACTCAACGATGAACTTTGCCTATTTCTTTTTTGGAGATCGAC

GAATCAAATGATATTTCTGTCCAATTTCTGCTTCTTTCTCTCCCTCTGAATCAAACCTTT  
TCCTTGCCATAAAGGTTTCAGTTCCTATATTATCAATGATACGGGTCGGATCCTAGATGT  
AGAAATAGAAGAAGGTGGATTCTCCCTTCTCCATCGAATCAAATGAAATTGTCGATGATA  
CAGCACATTAAAAAAAATTAACCAAATTTGCCTGATGTAGAGGCAATCAAGAAAGCT  
GCATAAGTGAATATATAACCTACAGAAAAGTGGGCTAATCCAACCAATCTTGCTTGACACA  
ATGGAAGAGCCACTGGTTTATCCCTCCATCGAATCAAATTAGCCAAAGGCGTGC GTTCA  
TGAGCCCATGCTAAGGTTCAATCAATTCCTGCCAATATCCACGCCAGGAAATTAAGAAC  
ATAAATCCAATAGCCCAAACAAGATGCCCAAATAGGAACATCCATGCCAGACCGATAAA  
CTATTCATACCAAAGGGGTTATAGCCATTGATAAGTTGTGAAGAGTTTAACCATAGATAA  
TCTCTTAACCATCCCATCAAATAAGTGGAGGATTTCGTTAAATTGTGAAACGTTACCCCTGC  
CATAATGTGATGTGCTTCCAATGCCAATAAAAAGTAACCCATCCGATAGTATTTAACATC  
CAGAAAACCGCCAAATAAAATGCGTCCCAGGCCGAAATATCACAAGTACCGCCTCGTCCC  
GGACCGTCGCAAGGAAAACTATAACCGAAATCTTTTTTATCTGGCATTAACTTGGAACCA  
CGTGCATCTAAAGCACCTTTTACTAAGATCAATGTAGTTGTATGCAAACCTAGAGCAATA  
GCATGATGAACCAAGAACTCTCCAGGACCTATGTTAAGAATAGTGAACTACTATTCTCA  
TTAACGGCATTCAACAGCCCGTAACCATATACTTCGACCAGCATGAATGCCGGGCCA  
TTCGTTGAAGATAAAAGTACATCGAACCCATATGAAGTCTTACCGTGAGCGGATTGTATC  
CATTTGGGCAAATATGGGTTCGATCAAGATTTGTTTCTCCGGAGTACCAAAAGCGAGCATG  
ACGTCGTTATGAACATAGAGTCCTAAGGTATGGAACCTAGAAAGAGACTGGCCCACTT  
AAATGAGATTTGATAGCTTCTTTATGGTCTAACATTCTTGCCAATACATTATCCTCATTC  
TGTTCCGGATTGTAATCTCGAATGAAGAATATAGCTCCATGAGCAAAGGCCCTGTCTATG  
ATGAATCCTGCGATGTATTGGTGATGAGTATATAACGCAGCTTGAGTAGTAAAGTCTTGT  
GCTATGAATGCATAAGCAGGTAAAGAGTACATGTGTTGAGCTACCAAGGAAGTAATAACC  
CCTAAAGAGGCTAGAGCAAGGCCAATTGAAAATGAATCGAATTATTGATTGTGTCATAA  
AGACCCTTATGCCACGTCCTCAATCGACCCCCGGAGGAATATGTGCTTCTAAAAGATCT  
TTCATACTGTGCCCAATCCCGAAGTTAGTTCTATACATATGACCAGCAACGAGAAAAATA  
AATGCAATAGCTAAATGATGATGAGCAATATCGGTCAGCCATAAACTTTGCGTTTGTGGA  
TGGAATCCCCCGAGAAGGGTTAGAATGGCAGTTCCCGCCCCCTTGGGAGGTACCAAATAAA  
TGACGACTGGAATCGGGGTTTTGGGCATAAAGATTCCACTGACCTGTAAAAAGTGGGCCC  
AACCCCTGAGGATGGGGTAATACATCTAAGAAATTATTCATCTGACGTACTGCCCCCTT  
GATCCTGGAATAGCGACATGAACATAATGCCCTGTCCAAGCCAAGGAAGTACTCCGAAG  
AGTCCTGACAAATGATGATTGAGACGAGATTCCGGCATTTTTGAACCACGAAACGCTTGGT  
TTCCATTTGGGTTGTAGATGTAAACCAACCCGCAATTAAAGATATGGCAGAAAGAAATAAT  
AGAAAAAGAGCTCCAGTATAAAGATCTTCATTGGTGCCTAAGCCAATTGTGTACCACCAC  
TGATAAACACCGGAGTAAGCGATATTCACTGGGCCGAGAGCCCTCCTCGAGTAAAGGCT  
TCTACAGCCGTTTGACCAAAATGGGGATCCCAAATTGCATGAGCAATAGGCTTACATGT  
AAAGGGTCTGTACCCATGACTCAAAATTTCTTGCCAAGCTACATGAAACAGATTTCCTG  
GAAGTCCACAGAAAGATTATTGCTAACTGCCCCAAGTGAGAAGCAAAATGTTCTGATAA  
AGACGTTCTCAGTAATATCATCATGACTCTCAAAATCATGTGCGGTAGCAATACCAAAC  
CAAATACGACGAGTAGTGGGGTCTGAGCTAAGCCTTGCGCTAAACTTTGGAATCTTAAT  
GCCATAATGCCTTTCAAATCTCCTAGCCATTATCTTACTGCAATAATCTTTGCTAAGAA  
GAATGCCCATGTGTGGTGGCAATTCCACCCAGAAGGTAATGGGTTACTCCTACAGCGCGTCC  
TTGTACAATGCTCAAGGCTCTAGGCTGAGTAGCAGGAGCAACTTTTAATTTGTATGAGC  
CCAAACGATGGATTCAATGAGTTCTTGCCAATAACCACGGCCGCTGAATAGAAACATTAA  
ACTGAAAGCCAGACAAAATGAGCACCTAGGAAAAAAGGCCATATGCCGATAATGAAGA  
ACCATAAGACTGAATTACCTGAGATGCCTGTGCCCATAAAAATCCCGGAGCCACCCATT  
AATAGTAATGGAACCTGTGCAAAAGTTTCTCCGTAATATGAGTTACCAACCCCTTGATC  
ACTTATACTACCCCAAACATCTGACTGCATTTTCCAAGTGAATGGAATATTACTACCGA  
AATAGCATGTACATCCAGAATAGACCTAAGAAGACATGATCCAGGCAGATACTTGACA  
TGTCCTCCCTCTTCCAGGTCCATCACAAGGGAAACGAAAACCAAGATTGCTTTATCAGG  
TATCAAACGTGAGCTACGAGCAAATAGAACACCTTTTCACTAGTATCAATACGGTCACATG  
GATCGTAAATGCATGAATGTGATGTACCAAAAAATCTGCGGTTCTTAATGGAATAGGTAA  
CAAAGCGACTTTACCGCCTACTGCTACTAAATCACCACCCCCCAAGTCAAGCTGGTGCT  
TGTTGTTGCACCAGGAGCTGTTGCACCAGGTGCTAAAGCGTGGGTGTTTTGTACCCATTG  
AGCAAAGATGGGTGTAAATTGTATAGCGGTATCTGAAAACATATCTCGGGGACGCCCTAA  
AGCGCTCATGGTATCATTTATGAATATACAAGCCAAAACGTGTAAGCCTAGAAATATACA  
TACCCAGTTGAGATGTGATATGATTGCATCTCGGTGTCTAAGGACACGATCTAATAGATC  
GTTGTATCGAGTAGTTGGATCATGTAGTCTCTTACCATAAAAAATGGCTGCATGTGCAGCAGC  
ACCAACTATGAGAAATCCACCGATCCACATGTGATGTGTGAACAACGAAAGTTGTGTACC  
ATAGTCAATAGCTAGGTATGGATAGGGGGCATGGAATACATATGGTGAGCTACAACAAT  
GGTTGAAGAGCCTAACATAGCTAGATTAAGAGATAATTGAGCATGCCATGACGTTGTGTAG  
GATCTCATAGAGGCCCTTATGACCTGGCCCGTAAATGGGCCCTTATGCGCCTCTAAAAAT  
ATCTTTACGGCCATGACCAATGCCCCAGTTGGTCTTATACATGTGACCAGCTACCAGGAA  
AAGAATTGCAATAGCTAAATGATGGTGTGCAATATCTGTGAGCCATAGACCCCTGTTAC  
TGGATCTAATCTCCACGAAAACTAAGAAATTCGCGTATTTTGACCAATTCAAGGTGAA  
AAATGGGGTTGATCCCTCGGCAAAACCTGGGATAAAGTTGAGCCAAAAGATCCCGATTCAA

GATAAATTCATGAGGAAGTGGTATCTCTTTAGGATCCACTCCAGCGTCTAGAAATTGGTT  
AATCGGTAAGATACATGTACTTGGTGTCCCGCCCAAGAAAGAGACCCAAGCCCTAGTAA  
CCCCGCTAAGTGGTGATTCAACATGGATTCCACATCTTGGAACCAAGCCAATTTTGGGGC  
AGCTTTTGTGATAATGGAACCAACCGGCAAAAAGCATTAAAGGCTGCAAAGACCAATGCACC  
GATTGCGGTACAATAGAGTTGTAATTCATTAGTTATTCAGATGCTCGCCAAAGCTGAAA  
AAAACCAGAGGTTATTTGTATTCTCGGAAACCCCGCCACATCACCATTCAATATTTTC  
TTGACCTACTATTTGGCCAAACACCTGGGCGCTGGGTCCAATGTGAGTAGGATCACTTAG  
CCATGCTTCATAATTAGAAAAACGGGCGCCATGGAAATACATACCCTCAGCCAAAGAAA  
AATGATGGAGAGTTGACCGAAATGAGCACTAAATACTTTTCGAGAGATCTCCTCCAAATC  
ACTGGTATGGCTATCGAAATCGTGAGCATCAGCATGAAGGTTCCAGATCCAAGTGGTAGT  
ATCAGGGCCCTTAGCTATTGTTCTTGAGAAATGGCCGGGTCTGGCCCATTCCTCGAAAGA  
AGTTTTTATGGGATCCCTATCCACCAAATCTTCACCTCTGGTTCCGGCGAACGAATAAT  
CATTGAGTCCCTCCTCTTCCGGACAACACATACAAAGAAACCCGCCAACAGTCAAGTAAT  
TAGTGAACGATGGGTATTTATGATTAGTTCCTTATCTTTCTATCCCCATCTATCTTTT  
TTTTTTTTTAGTTATTTACTAGAGCAATTATGATATGGAAGTCGATCCGGGGCAAGTGTT  
GGATCTATTATGACATAACCATGGGCGCTCAACGGACCTTTATAATATTTTATAACCCC  
CTCCGGCGTGACAAAAACGGATTTTTTGATACAAGCTAGTTAGTGTATTCATATCTCA  
ATGTATAGTATCTAGATGGATCTACTTCATATCTTACACGGAACATATTACTTACAATAC  
AAATCAAAGGATCATTTCATTAGTCATTAATAAGAGACATCTTGATATCTATATTTAGTCA  
TTGAGGTCGTCTGCTTTTTTACTGGCTTAGCTTTATTAGCATAGCAGAAGGGAATATTTTC  
TGTAAGTGTATCCGTATCGTTTATCCCTATGACAGACGAAATAGAACAATCTTAGACTTAG  
AAGGGATATAATGAAATTCCTGATTGGCTCTTCTAGAGGAACGATCTATTTTATTTGA  
TTGATGGATCCCATATTATAATGAATTCAAAAAGAGAATGTTCTTATTCAAACCTCCTTG  
CGATCTTCAACCAATTATGTGCTTCAATATAAATCCCCGGAGTAAGCGCTATAGCTTGTT  
TCCAATATTCAGACGCTTGATCGGACCAAGCCTCTGCAATTTCAGAATCTCCTTGTCGAA  
TGGCCTGTCTTCCCGGTCGGAATAGGTGGGTCAATTCCTTCCCTTAGAACCGTACTGA  
GAGTTTCTACCTCATACGGCTCGACATTCTTTTGGTGTTCATCTTAATCTACCATATC  
TAACTGAATGAGATTTCTCATAAATCTATCCCATTTTTTTTTTTCGGGTAAACCAGAAG  
AGGTTAATTACACGAGTTTCAAACTCTAATTTTGATCAATAATCAGTTTTCTCTTTCTC  
CCACCTTCAGAAGAACCAAGCATAGGTATTTTCTCTATCGTTCGAATTTTCTGAAAGGT  
AATATCTCGGTTTCATATAGAAATTCATATAGAATCTTTGAAAAAGACTTTCTCCATA  
AGAAAGAAAGGACTTACTATCTTTGGGATCTGATGCTACACCGCTGCTCAATACCTTAGT  
AGATCGACTCTATTACATAAGTTGATTCCCTAACTTTTATCTCATATCATGACATTAAGTA  
AGCAGTCCCTATGTATCGGTCCCCGAACCTCACTAATGATCTTTACGGTGCTTCCTCT  
ATCAATTAGATCCTTTATCCATAGAATAAAGTATATAGGCCATACCTATTTCTTCATATT  
TCGGCTCTTATGAAGTCTCTTTCTTTGCTACAGCTGATAAAAAATCGTTGCTTTGGACGAT  
GCATATGTAGAAGCCATTTTTGTTTTCTAGTATTGACTAGCGGATTTGGTCTTTCTCTCC  
TTCTTTCTATAGTGTAGATAGTCGCACGTAATGACAGATCACGGCCATATTATTTAAAGC  
TTGTGGTAAGAAATGGATTTCGTTCTATTGCCCGGAAATAATATCCAAGCCTTCGTGTG  
TTCTCCGTTACTTGTGTGGATAAGGCCTATGTTATAGAGTATATAACTTCGATCATAGGG  
ATCAATTTCTAGTCGCTAGCTTCATAATAATTTGTAAAGCTTCGCATAATTTCTTCTC  
GGATTGAGCTGACATCCGTTACGGTCGTTTCATCTCATTCAAAGAATCTCCGTTCCAGAAC  
CGTACGTGAGATTTTCATCTCATACGGCTCCTCCCTTCTGTGCATAGTAATAAGGGGAAT  
AATCCATGGAATCAAAAAAGATTGAAATATTCTCATTATGAACTGACAGGGGCTGGTGTT  
TTTACAAGAAATCTCTAGCCAGCCTTCCTGCAAGAGGTCTGTCTTTTCTTAACACCAGC  
GCGTTTGTGCTAGATAGAAATGGTAACCCAACAATTTCTTTGTCTCAACGCCCCCTGT  
TTCCAGGAATTAGTCATCTCAACGACCTTTGATGGTTATACGGGTATCCAAAGTACGAAC  
GAGATGGATGTTTTGTGTTGCCAACCATTCTTGTAGTTCCGATCCCGATAAGGAAAAGGG  
TTAATTTATAACAAAGTTTTCTGTGTTGTGATTCTAGATGTAGTGCTTCTTCCCCTATG  
CGCCTATTGGTACTAGTGGAGTAGGATTGACCCGCAATACAGAACCATAGGTGTAACC  
TTTCGCTCAATACTAGAATCGACAGTTGAAGCATCTAAGGCTGCATCAATCGGGGATACA  
CGACAGAAGGAATGTCTATCTCCAACTTCACCTTCATCAAGCGTAGGTTTATTTCAA  
GAATCTTTTTTCTTTGATCTCCGAATCATGTCTCTTTCTCGTAAGACTGAGGGCGGTAAA  
TAAATAAATTCAAAAAAAAAGCAAATCGCACCATCTCTGTAATAGGTAAATGCCTCTTT  
TTCTCCTGAGGTTGTGCGAATTATTTCGTAATAAGATATTGGCTACAATTGAAGAGGTCTT  
ATCAATAAAATTTCCATTTATCCGAGATCTAGGCATAGTTAACAATCCATTCTAGAATTC  
TTCTCATTACCCCTCAGGGGAAATGATTCACAAACAAGGAATTGTACAGTACGAAAT  
CACATAAAAAACAGACTCATTCTAAAAAAAATGTGGACCTTCCACTCAAATATCCCT  
TTTTGAGAGGTATAGATAGGAAATATTTGAATCGGATTGGATTTCATTGAAATTGAGTAG  
TATACCAATGAATGGAATCTTTTATTTTATCGAAGTTAAGAAATCCAGGAATTTTACT  
ACCGATTCTTATAATTTAATTCGATAAATTTGGATTTGATTATGATCCAAAGAGGAAAA  
GAATCAATAATCATTCCATGATGAAAAAGAAATACCATCCATTTTGTGTGCATAGTGT  
GGATACACCATCCAATCGAAAGATAAAAAATCTATAGAACGATTCATGAATTTGTAATAGA  
TCTATGGAGTAGCTCATGAGAGGAGTTGTTGTTGAGAAATCTGAACTGGAAGGGGGGAA  
TTTTGTAATTCATGGAATCGTAGTTTAAATATAAACATAGTCTAAAATAGGGTCAGTT  
GACTCGTTCCAATTCATTGGCTTAATCCGAAATATTAGAATAAGATAGGATCGTCGTATT

GACAAACAAGACATTTTTGTTTTTAAACAAGAAAAAGTGTGTTTTTTTTTATCCCTCGAGC  
CTCGAAGGAAAAATCGTTCTTTAGCGAAAAAGTTTCTATTTCTAATAGATTGGTCGTACCT  
GTATTGCAATAATATGAATGACTCGCTATTTACTCGGTTTCTGGGGCATAATAATAAGAT  
TATGTAGGAGAGATGGCCGAGTGGTTCAAGGCGTAGCATTGGAACTGCTATGTAGACTTT  
TGTTTACCGAGGGTTCGAATCCCTCTCTTTCCGTACCTTCATCTAATTCACCAACCGACC  
ACAATGTATCAAATCAAATAACAATTGATACCATTATTTCCAACAGTAAGACCTTATTTG  
ATAGAGATTCTCTATTCCTAATTACTGCGGTACGGAATAACCGGAAAGAGTGGAAGG  
AATGAAAACTCACTGCTGATCCATTTGTGATACGTGAATGGGAGAAAAATCCGGATCAA  
ACCCCTTCTTCGGTGAAAAAAGAGGGGGGGGCAAAATGGTCCGAAGCTTTGT  
ATTTTAGTTAGGTCAAGTCTGACGGGAATAATATTCTACGACTAGAACTCATTGATTT  
TCAAACCGATCCATTTAATATCTATTATTTGATTTACTAATCCTTTATATTGGGATGAGT  
CAAAAGTCAAATGTTTTGCCAAATCCTCGCGGGCGATGAATCAAGATAAATTTGAATCA  
GAGCTCTGGATCTTTGTTCATCCCTTGCAAGTAATAATCTCGGGGTTGACGCGATAAC  
TTGGGATATCTACTACACGACCATTAATAAATATGTCTATGGTTAACTAATTCCTGG  
CTCCAGGAATGGTCGAGACATAAGACCTAATCGAAAAAGGATGTTATCCAAACGCATCTCA  
GTAGTTGTAGTAAACCTGACCTGTTGACCTTTGGCTTTTCCGGCAATACGAACATATC  
TAAGCAATTGTCGCTCTGTCAGACCATAATGAAAACGCAATTTTTGTTTTTCTCTAGAC  
GAATACGATATTGAGATCTTTCCCGAAACGTATTGGTTTCTAAGATCACTCCGGATC  
TAGGTCTTTTACTAGTTAGTCCCGGTAAAGCCCCGACAGCGTATTTTTTGAACGAG  
GCCCTCGGTAACGAGACATAAAGACTCCTTGTTAAAAATGTATTTTACAGAATAAACTTA  
AATTAAGACTGAATAACGATAAACGAACTAAATCTATTGAAGTACTACAAAAGAAGA  
CTACAAAAGAAGAATGAGATGAATTGTATCAATATCCGGATTATTTGTATATATAGGAA  
GTGAAGGACCCCTTTCTGTGATTGTTCTGTAGTGTAGAGATTAACTGCTCCAATCAAAT  
AAGTTTTTTATTCATAGTTGGAAGTTGCTACGACATAATAGATCGGTGACCCGACATTTT  
TAAAAGAAAAAAGAGAGGAGTCTTTTCAATATTCCTTGATCTCAAGGAATATGAAAAG  
CCGGCTATCGGAATCGAACCGATGACCATCGCATTACAAATGCGATGCTCTAACCTTGA  
GCTAAGCGGGCTCACATAACAGAAATAAGTGCAATAGAACTAACTAATATATCTATATA  
GAATGTTTTTTTTAATTCCTAATTTATATATTACTTAATTTATAGCAGTTAGTTATAG  
CAGATTAGATTAAATCATATTAGAGCAGATCGGTACTAAGGAAAGGATAAGATAAGGATGC  
AATCCAGATCATAATGAGACATTTCCGCCGTTTCATTCAGAAAGGGGGGAGGTAGAACGA  
AAAAAATAATGAATATCGAACCTTCCAGTTTCAAGTATTAATAATCGCGCGGAAAAATGAGAGG  
GGGAGGGTATGTATATGTGGGATATCTCTATCCATATTGAATTGCAGATACATCAATGA  
TAGAATCATTTCTGATGGGACCAATACGGGTCTTCCGATAGAGAATATGGACAAGAAAT  
CAAAATAAAATAAATAAATAAATAAATAGGAGTAGACTTTTTTTCGATATTAGGAATCA  
GTATCTAATGAATTCAACGGTTCCGACATAAATAAATGAAAGAGGGGGATGGGATCACAA  
TGAGATCTCGGTCTCATAAGGGGATATGGCGAAATTGGTAGACGCTACGGACTTGGTTGG  
ATTGAGCCTTGGTATGGAAACCTACTAAGTGATAACTTCCAATTCAGAGAAACCTTGA  
ATTAAAAATGGGCAATCCTGAGCCAAATCCTGTTTTTCAGAAAAACAAGGGTTCAGAAAGCG  
AGAACCAAAAAAGGATAGGTGCAGAGACTCAAAGGAAGCTGTTCTAACGAATGGAGTTG  
ATTAACATTGGTATAGGAATCCTTCTATCGAAATTCAGAAAGGATGACCTTATCCTATA  
TACGTACTGAAATATCAAACAATTAATCACGATCCGATTCGGTATTTTTTTTATATGAAA  
AATGGAAGAATTTCTGTGAATCGATTCCAAATGAAGGAAGAATCGAATATTCAAGTGATC  
AAATCATTCACTCCTCGGATAGATCTTTGAAGAACTGATTAATCGGACGAGAATAAAGA  
TAGAGTCCATTCTACATGTCAATACCGACAACAATGAAATTTATAGTAAGGGGAAATCC  
GTCGACTTTAGAAATCGTGAGGGTTCAAGTCCCTCTATCCCAATAAAAGAAAAAGAGCC  
CGTTTTACTACCTAACCTCTTTATTTTCGTATCGGTTCCAAATTAGTTATGTTTCTTATT  
CACTCTACTCTTTTACAAACGGATCCGGACAGAAACCTTTCTCTCTTATCACAGTCTAT  
AGATACGATATACTTACAAATGAACATATATAGGCAAGGAATTTCCATTATTAAATAATT  
CACAGTCCATATCATTACTCTTACACTGACAAAGTCTTCTTTTTGAAGATCCAAGAACT  
CCAAGGCTAGGTAAGATTTTGTAAAGACTTTTTGGGGTTCTTTAATTGACATAGACCCCA  
GTCCTCTAATAGGGCGATGCATCCGGAATGGTCGGGATAGCTCAGCTGGTAGAGCAGAGG  
ACTGAAAAATCCTCGTGTACCAGTTCAAATCTGGTTCCTGACACGCGGTTAATGTATCGA  
ATGGATACTCATCCAAATGAATGGGTAAAGGAAGAAGTAGATTTTGTCTCTTTTTTTTA  
TACTGTACCCCTCTCGCTCAAAAAGAATGTTAATACTTCATACATATCCAAAGTTAGGT  
GGCTGAAACCAAAAAGTCTAGCCTAGGGGAGTTGAAGGATAGGAATAGACAGGATTCATT  
TCAGATACAGTACAAAGAAAATACGATCCCTTTTCATTCTGAATTTTCATATTTTCTTGC  
GTATTCTATTTCTCACTCCCTCTTACGCGACTTCCAGGAGCCCATCCAAGTGATATGCG  
CGGTACAAAGTTTCATGGTACAGAACTCTTTTGATTCACTATTGGCTTTACTCATCCGA  
AATAGATATATTTAAAAATGGGGAATATCAACGAAGCCTATTTATTAGCTCATCCATAAT  
ACGAATTAGAGCCAGTTACTCTGTTTCATCTAGAACGTAAAAAGATTCTTTGAATATCT  
GGAGTCGTAGAAGTGAAGATTAGTTTCTTATCATTCATGAGCATCTGTATTTCATAGA  
AATTGGGGGCAATATAATCCTTACGTAGGGGCCATCCCACCAACTTTCGGGCATCAAGA  
TACGTTTCAGGCGTGATGATTTTCATAAGAGATCCCAACATATCATAAGATTCCCGTT  
CTTGAAAAATCAGCACTTTTCCAAATCCAGAAACAGACGGGATTTCTAGGATTCTCTCTTG  
GAACAAATACTTTTATGCACACCTCTTCGGGTTGATCCACCCCATCTGTATTCTCGTAA  
GATGATACACACTAGCTAAAAATCCGCCAGGTGCTACATCATAGGCACACTGGAACGTA

GATAATTGTAACCATATACATATGAAATAACAGCAATGGAGTACCAATCCTCGGGCTTTA  
TTTGTAAGTCTCTCTTCTTGGTAATCGAAGCCCAAGATCTATGAACTAGCTCATGCT  
TGACTAGCCAAGCAGATGAACGACCCCTGCATCTTCTTGATCTCTCCACATTTGTATGAA  
TATTTTACATTTACGATGAATTTTATGAAAAATGACTCGCCGTTTGTATTCCGCACAAA  
AACACCCCTGCCTAATTCATTAATTTGGGGGAAGATACTGAACCTTTGTATTTGAAAAATG  
TTTCAGAAAGGTATCTCTGAAGTAGATGGAGATTGGTAGAGTAATCCTTGATCGTAATTC  
CAGTATGAGTACTGTGTCCAACATGAACTTGTGATTGGTAGTAAAAATATCGATTTTCCT  
GTTGAGACCCAATTCTATCTTCATAGATTTCTCGAGAGACTTTCTTACGAAGTTTCGTTA  
TAGCATCTATAACTGCCCTCTGGTTTAGGGGGGCAGCCCGCAAATAGACATCCACAGGAA  
TTAGCTTATCGACTCCCCGAACAGTACTATAAGAATCGGTACTGAACATCCCTCCTGTAA  
TAGTACAGGCTCCCATAGCAATGACATATTTTGGTTCGGGCATTTGTTTCATATAATCTCA  
CTAACGAAAGGAGCCATTTTCATTGTGTACTGTGCCGGCTGTTAAAAATTAGGTCCGCTTGCC  
TAGGACTTGATCTTGGTACCAGTCCATAACGATCAAAATCGAATCGCGAGCCTATTAATG  
AAGCAAATCAATGAAGCAACAACCTGGTACCATAAAGAAGCGGCCATAAACTAGAGAGTC  
TTGACCAATTCGAAAGATCATTTCGATGTAGTTGAAATAACTGAATTTTGGGCGGTTCCGGT  
CAAGTAACGGAACCTCAATAGAATTCTAACTGTTTCAATGTAATCTTTTCTCTTTTTT  
GATTTTGATTGTCTGAATATTCAGGAGCTAAGACCATTCCAATGCTCCTTTTCGCCATGC  
ATAAACTGAACCAACAATTGGGATAAGCACGAAAATTAAGCTTCTATAAACACAGATAC  
ACCCAATACATCGAACTCATTTGCCCATGGATAAAGAAAGACTGTTTCAACATCAAAAAC  
AACAAAAAAGTACAGCAAAACATGTAATAGCGGATTTCGGAATTGTAACCAAGCATCCCCAT  
CGGTTCTATGCCCGATTTCATAACTAGAGAGCTTCTCTGGTCCCTTCACTAATCGGGGCCAA  
AACTCCGGAATTAGAAATGCCAAAATAGGAATAACACTTGATATTATTAGAAATGCCCA  
GAAAAATCATATTCGTGAAGCAGAAACATAGAAGCACTCCTATTAATGTGGAATATACC  
GAATTAGTTGATTCAAATTTGGAATTCCTCAATTCATCCATAACTGCATTAGTCGAAACAAC  
AATTTTGATCAAAACCATAGTTTCGTTTGTCTTACTTGTGTGGGTCATGTATCGTCTCA  
AGATTCATCCAAACGGAATCCCACTTACACTTACTTTCGATTCTATTTAGATATGGTGTAGA  
CATATAATGCTATTATACAAATCAAACCTCTCTCCTACCTTGCCCTCGGGTTTTCTATCAAA  
CAAAAAAGGAATTAAGGAATTTTTTTTTAAAGAATATTTTAAATAATATGAATTGAAATT  
GAAATAATATTCAAACAATATTATTCAAATAAGATTAAATGAAATATATAAACATAAATAA  
TTTCAATATTCTATTAATATAATAGAGCCAAAGAGGAGGTCTGGCCCATTTTTTCTCTCT  
CTCTCTTTTTTTTTTTTTTCTTAGTGATTAGAAATATAGTCAGTAGTCAGATGTAATAGA  
ATTTCTAGGAATTTCCATCTCGGGATTTATGGTATATTCTACGTGGCTGTGTTGGTGTAT  
TCTTTTCATTAAAGATCCGGATAGAGGATTATTGTTTCTATTGATTGATACGGATACGAA  
AACGGAATGCATCGACCGATTTCGATTCTCTCTCCTGTCCCAGATTTATACTTAATTGAT  
TTGATTCAATCCATTGAATTGTGAGGAACCCCTACATATAAAAACTCATGGGTTCCTATA  
CCCAAATTAGGAACTTTGGACCTGTACTACCCCGCCCGGCTTTACCCCGAGTTAGA  
AGCTTTGAAAGAAATCATTTCAGACCCATTTCTAGGACTAAAGATCGTGATTGGAATGAC  
TCGAAATACTTATTTATTTAATGTAATAATAACACCTAGCAGGACCAACCAACGAGTTAG  
GTTTCGTGACAACAAAAACGTTTCTTTTGAAGCAAACCTACAAAATGGGGCATAGTTTA  
ATGGTAGAGTCGGCTGAATCGTAAATGATTTACAGAAGATACTTCGAATGGAATCATGCG  
TTGTCGAACGATTCGATAGACAAAATCTCCCCATCCCAAAACCAACTCATAGAACATAGA  
AATAGAAGAGGGTGCCTGTATACATTTAGGACCAATTCATTGTCTCTAAAACAATGAATT  
GGGATTGTGTCTGCCAAAAGCGGATACGTCCGGGGATTCCTAACCTCATCCAAGTTCAA  
ATGGGCCCTAATCTTTTTAGATAAAGTCTGCATTGGTAGAATTGGAATGATGAACAAATT  
GGATTGGGTAGATTGGAATAAAAAAAGAAGTTATTAGTATGTACAGAAAAATGACTA  
CTTGCTTTGCTAAGCCGTTATACGAAGAAAAGCCTATTGTACAATGAACTTACCAAAG  
AGCTTCGTTTTTGAACCTCTGGCTTTTCTACAAATACAAGAACAAGATAGGTTCTAGAT  
AATGTGACTTACTATTAGATTGAATTTGGATTGATTGTTGGTTGGGTGAGGTTGATTTT  
TCTTGAGCCAGGCTCATGTTATGATTTTGACTTCATAAATTGGCTTGGGTATACCAAAGC  
AAAGGTGTATCACTAAATCTTGATCATGGACAAATAAAAGAGGAAAAAGGCCGTATGTC  
ATTCACAGACGAAGATTAATGAAGAAGATGGGTTTGTATTCCGAGATTTGAAAAATACC  
GATCCGATTGGATCCATTGGAATAAATTATTGTTTTCAAGCCCGAGGGATCTCCGTGAT  
CCTGTGGGAATGATTCCATTTCTATGGAACAATCAACCGGCCGGTCACACGCACTAATTA  
GGAAATGAATACAAAAATGTATAGGGCTATACGGAATCGAACCCTAGACCTTCTCGGTAA  
AACAGATCAAACCTATTATTATCGAAATGATTGGAATGTTTCAAAGACCCAACATGCGT  
TTTTTTTTTTTGCAATTGGGCTCTTTCATTAACCTGATAAAAAGATCGGCTAGTCCACCATAT  
TTTTTCTTGACAGGAAGATAACGAGATGGCTCCATGCGCTCGGATTCAATTATTGAATTC  
TGATCCGGGAGCAATACCAAAGTGTTTCAAAGAAGGGTTACCTGACGTAGGTTCTGCCTC  
CGGCCTAGATCAACCTAAGTTAAATGGAGTCTCTATCAATCCGCCCCAAGAGTCAAAATAT  
GATACTTAATACACCTTAAAGTTCATAGGACGAAAAGAGGTTATTTTGAGGTCCTTATCC  
TCATTATGCCTAGCATTGAAGGACTGGGTATTCACCTTATCAATGATCAAAACCAATGAT  
GGGTTCTATTGTTACCTGAATTGGCACCTGAATCGGACCGAACAAAAATTTGTGTCAGGC  
TATTGTTCTCTGTTCCCTCGAATCCATGGAGTAAGACATCGATTTCTCAATAAGATCAA  
TTCTGTTGATTGATGATGGACTCCTCTGAAAAAGCATTTGGCGCGCGTGTAACGAGGTG  
CTCTACCTAACTGAGCTATAGCCCTTGTATAGACATATTAACATCTAGATAAATTTCTTG  
TCAAGATGGATATTCATAATCCCATGATAACTCTCCGATCCGTTTCTGCCAAGGAT

TGGTATTGCTGAGAAGTAATATTCCGTCTATAATCCCCGATGTGATGGGTCCCATTTTTT  
CTTTCTCTTTGTGATGATAAATGACCTACTTAACCCAGTGGTTAGAGTATTGCTTTTCATA  
CGGCGGGAGTCATTGGTTCAAATCCAATAGTAGGTAGAAGTTATTAGATACCGGAGTCGA  
TGGTATCTAATAAGTTTTTCTACCCACCTTCTCTCTTTTTTTTTTATGGATTTTGTAACC  
CTTTCCCTATTATACCCCACTACTCATATTTGTATTTGTTTTTTTTTGTTCGTTACAT  
CAGATTACAATTGATTGTATCCAATTGGCGGAATCCAATATGGTGTATAAACAGAACTT  
CTTTTGATTATTCTGATACATTGACTAGTACGAAATAACATTGATAGCCTCTACTCGTGT  
CCTAGCTCGTCTAAGAGCTAGATTCCGCTCAATTGCTTGTCTCTTGCCCTTCAGCTCTACT  
CAAGTTAGCTTCAGCTATTTCAAGAGTTCGCTGAGCTTCTTGTGGATCAATGTCACCTACC  
CTTCTCTGCATCATTTTACTAAATGGTGATCTCATTATTGCCATTCTAGCGAAACCGCC  
CATCACAGCCATCGTTAACCATTGGTCGTTGAGGCGTATTCTCAAAATACCTATATCTAC  
GGGTGTGGCAATAGGGGCGTGATTTGGTAATACGCCAATTTGGCCACTATTAGTAGATAA  
AATGATTTCTTTCACTTCCGAATCCCAAATAATTCGATTCCGGAGTCAGTACACAAAGATT  
TAAGGTCATTTCTCAATTGCTCTCCACTTCTAAGTTTATAGCCTTCGCAGTAGCTTCA  
TCAATGTTACCTTACCAATAAAGGCGCTGCTCGGGAAGACCATTCTAATTCTCCGGAAGG  
ATCAGTTGAAACCCCTAATTGTTTCTGTAAGACCAACATATTTCCCTGGAGAACCAGTA  
AATACTTCTGCTACGAAGAAGGTTGTGATAAGAAACGTTCAATTTTTCGTGCTCTTGCT  
ACGGTTAAACGATCCTCTTCAGATAATTCGTCCAACCCAAGGATAGCTATAATGTCTCTGA  
AGTTCTTTGTAACGTTGTGAAGTTTGCTTAACTCTTTGCGCAGTTTCATAATGTTCTCTCA  
CCAACGATCCTAGGTTGTAGCATAGTTGACGTTGAATCTAACGGATCTACTGCTGGATAG  
ATACCTTTGGCAGCTAATCCTCTTGATAGTACGGTAGTAGCATCTAAGTGCGCAAATGTC  
GTAGCAGGAGCAGGGTCGGTCAAATCGTCCGAGGTACATAAACTGCTGAATGGAAGTT  
ATAGACCCCTCTTTGGTAGAAGTAATTCTTTCTGCAAAGAACCCATTCTGTACTAAGG  
GTAGGTTGATAACCCACAGCGGAAGGCATTCTACCTAATAAGCGGATACTTCTGATCCT  
GCTTGGACGAAACGGAATAATTGTGCGATAAATAGAAGTACGTTCTGTTCAATTAACATCC  
CGAAAATATTCGCCCATGGTTAGGGCAGTCAAACCAACTCTCATACGAGCTCCCGGCGGT  
TCATTCATCTGTCCATGGACTAGAGCTACTTTGGATTCTGCAATATTTTGTTCATTAATC  
ACTCCGGATTCTTTTCATTTCCATGTAAAGATCATTTCCCTTCACGAGTACGTTTCGCCTACT  
CCGCCAAATACAGATACACCTCCATGAGCTTTGGCAATGTTGTTGATCAATCCATGATG  
AGTACTGTTTTACCCACCCAGCTCCCCGAATAGTCCGATTTTTCTCCACGACGATAA  
GGGGCTAAAAGATCTACCACTTTAATCCCTGTTCAAAGATTGATAAATTGGTATCTAAC  
TGGATAAAAGCAGGCGCAGATCTATGAATAGGAGATGTTGTGCGAGTATCTACAGGACCT  
AAATTATCAACAGGCTCTCCAAGAACGTTGAAAATTCGTCTTAGAGTAGCTCCACCCACT  
GGAACGCTTAGAGGAGCTCCCGTGTCAATCACCTCCATTCCTCTCATCAGACCATCTGTA  
GCACTCATAGCTACAGCTCTAACTCGATTATTTCCCTAATAATTGCTGGACCTCACAAGTC  
ACATTAATTTGCTGACCGACAGTATCTCGACCTTAACTACCAAAGCGTTGTAAATATTA  
GGCATCTTGCCGGGGGAAAGCTACATCCAGTACCGGACCAATGATTTGAGCAATACGC  
CCCAGGTTTTTTTCTTCAAGTGTGGAAACCCAGGCCGAGAATTAGTAGGATTGATTCTC  
ATAATAATGAAAGTGAAATATGTCAAAATTTTTTGCGAATATTACCGAATCGAAAATAAA  
TGTCGATAGCAAGTTGATCGGTTAATTCATAAATAAGAAATGGGAGTTAGCGCTTGAT  
TTCGTTGGTACCATTCAACTGAATCCAATCAATCGTTTACTCATTCACTAAATGAATTT  
TCAAGTTCAACCAACCTTTTTTCAAAATATCTATCAAAATCAAGTAGATGAATAAGAATCA  
TGGGGAAGTCTTTTCATTTTTCTATCATTATAGACAATCCCATCATATATCTATGGAAC  
TCGAACCTGAACCTTTATTTATGATTGAGATTTCTATCTTATTGGCCGTTGTTCTTATT  
TCAGCATATTAGTTTCCGCCATTTCTTGTTTTTATTTTTTATACCCTTTCATGGATGAAT  
TCTGCCTATTTTCACATCTAGGATTTACATATACAACATATATCACTGTCAAGGGTGAAT  
TTCTTATTATTAGATTCAAAAAAAGAAGGAGATCCAACTTGCAAACAAGGATTGG  
GTTGCGCCATACATATGAAAGGGTATACAATAATGATGTATTTGGATGTATTTGGCAAT  
CAAATACCATGATAACGAACCATTTCAATTAGTTGATAATATTAGTTGAGAATTTTGTGA  
AAGATTCTGTGAAAGGTTTCATTCATTACTAATCCATGTGCGAGTAGACCTTGTGTGTGT  
GAGAATTCTTAATTTCATGAGTTGTAGGGAGGGACTTATGTACCAAAAAACAGAGACTAAA  
GCAAGTGTGGATTCAAAGCTGGTGTTAAAGATTACAAATTGACTTATTATACTCCTGAC  
TATGAAACCAAAGATACTGATATTTTGGCAGCATTTTCGAGTAACCTCAACCCGGAGTT  
CCACCTGAGGAAGCAGGGGCTGCGGTAGCTGCCGAATCTTCTACTGGTACATGGACAAC  
GTGTGGACCGATGGACTTACCAGCCTTGATCGTTACAAAGGACGATGTACCACATCGAG  
CCCGTTCTCTGGGAGGAACTCAATTTATTGCCTATGTAGCTTACCCCTTAGACCTTTTT  
GAAGAAGGTTCTGTTACGAACATGTTTACTTCTATTGTGGGTAATGTATTTGGGTTCAA  
GCTCTACGAGCTCTACGCTGAGGATCTGCGAATTCCTCCTGCTTATTCAAAACCTTC  
CAAGGCCCCCCCCATGGCATCCAAGTTGAGAGAGATAAATTGAACAAGTATGGTCGTCCT  
CTATTGGGATGTACTATTAAACCAAAATTTGGGTTATCCGCCAAGAACTACGGTAGAGCG  
GTTTATGAATGTCTCCGTGGTGACTTGATTTTACCAGGATGATGAGAACGTGAACCTCC  
CAACCATTTATGCGTTGGAGAGACCGTTTCGTATTTTGTGCCGAAGCAATTTATAAAGCG  
CAGGCCGAAACAGGTGAAATCAAAGGACATTACTTGAATGCTACTGCAGGTACATGCGAA  
GAAATGATCAAAAGGGCCGTATTTGCCAGAGAATTGGGAGTTCCTATCGTAATGCATGAC  
TATTTAACGGGGGATTCACTGCAAATACTACCTTGGCTCATTATTGCCGGGACAACGGC  
CTACTTCTTCACATCCATCGCGCAATGCATGCAGTTATTGATAGACAGAAGATCATGGT

ATGCACTTTCGCGTACTGGCTAAAGCGTTACGTATGTCTGGTGGAGATCATGTTCACGCT  
GGTACCGTAGTAGGTAAGCTAGAAAGGGGAACGGGACATCACCTTGGGTTTTGTTGATTTA  
CTACGTGATGATTTTATTGAAAAAGACCGAAGTCGCGGTATTTATTTCACTCAAGATTGG  
GTCTCTATGCCAGGTGTCTGCCCGTGGCTTCAGGGGTATTACGCTTGGCATATGCCT  
GCCCTGACCGAGATCTTTGGGGATGATTCCGTACTACAGTTCGGTGGAGGAACCTTAGGA  
CACCTTTGGGGAACGCACCTGGTGCAGTAGCTAATCGGGTGGCTGTAGAAGCGTGTGTA  
CAAGCTCGTAATGAGGGACGTGATCTTGCTCGTGAAGGTAATGAAATATCCGTGAAGCT  
GCCAAATGGAGCCCTGAGCTAGCTGCCGCTTGTGAGGTATGGAAGGAGATCAAATTCGAA  
TTCGCCGCAATGGATAACCTTGTAATCCAGTAATTCGCTTCGTTCCCTAATTGTAATTA  
AACTCGGCCCAATCTTTTACTAAAAGGATTGAGCCGAATTAAGAATGAGGATCCTATGT  
ATATGGATAGATATAGATCTTGATCTATCAATATGTGCCTACTTTACCTAGATATACAA  
GATCTAAATACAGATAAGATCTAAGACTAAACAACCTCAATGCTTCTATTGTTGGATCCA  
TAATTAATCCTATGGATCCTTAGGATTGGTGGATCCTTTTCTATCCCGTTGTTTCGGACC  
ATAGATCGAGCCAAGGGTCACAACTTCTTCTACTCATCCTGTATATTGTCCTTTTCATTC  
CGTGTGGATTAGAAACTTATTATTATACGAGATTATACGAAATGAATCCTTCCCTAGGA  
GGGAACAAATATTTCTCTTTTCGATGAGAGTTTGTACACAACATGGGAGAAACCTATCTT  
CTATTTATAATAATTGAAGAAAAGGTTCCATCATATCATATATAGTGAATTGATACTCCC  
GATTTCCACAAAATCATTCTTTTCGTTCAATAGTTACTCGTTATTAGTTAATAATCCTAG  
TGATTGGATCTATATGCGTATTCGATAGGAAATGAAATAGTAAAATGATTTTTCGTCGA  
ATGACTATTCTATTATTGCTATTTTCAAATAGGGGGCAGGAAGGATCTATGGGAAAATGGT  
GGTTCAATTCAATGTTGTCTAACGAGGAGTTAGAACACAGGTGTGGGCTAGGTAAATCAA  
TGGACAGTCTTGGTGCCTGTTGGAAATACCAGTGGAAAGTGAAGATCCCATTTCTAAATG  
ATACGAATAAAAAACAATCATATCATGGTTGGCGCGAAAGTAATAGTGCAGTAATGTTG  
ATCATTTTTTCGGTGTGAGAGACATTTGGAGTTTCACTCTCTGATGACACTTTTTTAGTTA  
GGGATAGTAATGGTAACAGTTATTCGTATATTTTGATATTGAAAATCGGGTTTTTGAGA  
TTGACAATGATAGTTCTTTTCTGAGTGAAGTGAAGTGAAGTGAAGTGAAGTGAAGTGAAGT  
GCGGGTCTAAGAGTGACAATCGCTACTATGATCATTATATGTATGATACTACGTATAGTT  
GGAATAATCACATTAATAGTTGATGATGATGATGATGATGATGATGATGATGATGATGAT  
AGTACATTTTCGAGTGGTAGCGACAATCCCATTTACAGTTATATTTATAGTTACATTTGTA  
GTGGTGAAAGTGTAAGTGATAGTGACAGGGGGAGTTCTAGTATAAGAACTGGCGGTAATG  
GCAGTATTTTCAATATAAGAGGAAGATCTAATGATTTCGATGGAAATAAAAAATACAGAC  
ATTTATGGGTTCAATGCGAAAATTTGTTATGGATTAAATATAAGAAAATTTTTTAGGTCAA  
AAATGAATATTTGTGAACAATGTGGATATCATTTGAAAATGGGTAGTTCAGATAGAATCG  
AACTTTTCGGTTGATTCGGGCACCTGGGATCCTATGGACGAAGACATGGTCTCTATTGACC  
CCATTGAATTTCACTCGGAAGAGGAACCTTATAGAGATCGTATCAATTCGTATCAAAGAA  
AGACAGGTTTAACTGAGGCTGTTCAAACAGGCATAGGTCAACTAAATGGGATCCCATAG  
CCATTGGGGTTATGGATTTTTCAGTTTCATGGGGGGTAGTATGGGATCCGTAGTAGGCGAGA  
AAATCACCCGGTTGATCGAATATGCTGCTAATAGATCTCTACCTGTTATTATGGTGTGTG  
CTTCTGGAGGAGCACGCTATGCAAGAAGGAAGTTTGTAGTTGATGCAAAATGGCTAAAATAT  
CTCCGCTTTATATGATTATCAATTCATAAAAAAGTTATTCTATGTATCAATCCTTACAT  
CTCCTACAACCGCGGAGTAACGGCCAGTTTGGTATGTTGGGAGATATTTATTATGCTG  
AACCCAATGCCTACCTATTCCTTTGCGGGGAAAAGAGTAATTGAACAACATTTGAATAAGA  
CAGTACCTGACGGTTCACAAGCAGCTGAGTATTTATCCATAAGGGCTATTTGATCCAA  
TCGTACCACGTAATCCTTTAAAAGGTGTTCTGAGTGAATTATTTACAGTACACGGTTTCT  
TTCCCTTGAAATCAAAATCAAGTAGAGCGCTAGGCTCAGTTATTTGTAGCGAACTTTAGT  
TCATCGGAATCAAAGTCAAATAAGAAGAGTGGAGTTTCTTTGGTAACATAACTTCTAT  
AGGAAGTTTCGGATAAATTCTTTTGGATGCAGATTTTATCCTACCCCTATTCATGA  
TTAGTAATCAGGAACCCCTATCAGGAGGAAAAGAGTGAATTCTTCTTCCGCGGAATGG  
AATTGGGAAAAAAATCAAAGAATTTTCATGTTCCCTTCTTTCATATTAATATATATCGT  
ATTAATATATATAGAATAATTCAAATCTATAAGGGAAGTGTGCATATTTTATATCTCC  
CGAGGACCTACACTTTTGACTATGAATTCCTGTTGGATCGGATTCTAACAAATCCTTAGG  
AACTCGTAAGAACTCTTTATTAGAAGATAAGGGCGGTAGAACAAGAATAATAAGCGG  
ATTATCATCCATCTATTCTTGTAGAAGGTGAATAGATACACTTATTTAGCTCTACATT  
CCTTGCACTTATTATATACTTAATAATACTTATAATAGATATACTTATCATAAGATAAGA  
TATCTTTATAACAGGTACAAATATTAATCGAGGCACCCATTCTATGACAGATTTCAATT  
TACCCCTCTATTTTGTGCCCTTAGTGGGCTTAGTGTTCAGCAATGCAATGGCTTCTT  
TATCTCTTCATGTTCAAAAAACAAGATTGTTTAGACCTGATAGGACAAAATTTTCATCAA  
TTATTTCAACACTTGGACTTGGATCATAATAGGGATATCCATTTAGTGGAAATATGATAC  
GACATGTGGCCCCCTCCGGGCACAAATAAAAAAGTGATTATACATGCGGATACATTATAT  
ATGGATAAATGCATGTATATGGGGGATAGCTGTTTTAAAATGGATCAGAGCGGATATCT  
GAAATAGAAAGTTAAGTATCTATATTATGTAGATATACATAGTGGTGGTATATACGAA  
GGGGATGTTATTTTATATCTAACCAATTCGATGAATTACTCCTAATAGTTCGCGTCA  
TAATAGTGCTAGTTGATGAGAGTTACTTCGGGAGCAAAATAAAAAAGTAAAAATCAAAT  
CATTTGGCTTATCTCTTCTTCTCAATTCCAATAGGATGCAACTGAATCTAGTATGAAC  
TCGATCAGAACGTATATGGATAGAACTTATAACGGGGTCTCGAAAAACAGTAATTTCTG  
CTGGGCTGTATCCTTTTTTTTAGGTTCACTAGGATTTCTATTGGTTGGAACCTCCAGTTA

TCTTGGTAGGAATCTGATATCTTTATTCCCGTCTCAGCAAATCATTTTTTTTTCCCAAGG  
AATCGTGATGTCTTTCTATGGGATCGCAGGTCTGTTTCATTAGTTCCTATTTGTGGTGCAC  
AATTTTCGTGGAATGTAGGTAGCGGTTATGATCGATTTCGATAGAAAAGAAGGAATAGTGTG  
TATTTTTCTGTTGGGATTTCCCTGGAATAAATCGTCGCATCTTCTTCGATTCCCTTATGAG  
AGAGATTCAATCGATCAGAATGGAAAGTTAAAGAGGGTCTTTATCCTCGACGTGTCCTT  
TATGGAATCAGAGGCCAGGGCGCCATTCCCTTGACCCGTACTGACGAAAATTTGACTCC  
ACGAGAAATTGAACAAAAAGCTGCTGAATTGGCCTATTCTTCGCGCTGCCAATTGAAGT  
ATTTTGAAATGAAGGGAATGAATGCTTTCTCAGCATGAGGGAAGGGACCCAGGAACCCCC  
TTTTAAATATAACTGAAGCTTCTTCGGAACGTTTCATTGAGCAAAACATGTTAGATTCTA  
TTTCCCCCGTTCCGTTGGTAATCCTTCTGTGGCCATAGAATAAAGCAGGCGGACGTATA  
CGGAACAACCATAATAAGAAGCAATTTTGATCGACCAAACTCCTTTTTCTGCATATAGA  
ACTCAATTCTACTAGTAACAAGTCTAATAAGTATGTATTCATCACACATATCAGAGCATT  
TCGGAATACATAATTTCTCTTTTAGGACCAATACTTTGGATTAAACATTAGATACAGA  
TGTATCATATCCCGTTAATTATCTTTCTTTTGTCATCGATGTTCTTTTTTGATCCTTT  
CTTAGCTCCTGGATAACCAACGTTTAGATCTCTCATAACTATCCAAATTTCTCTCTCGT  
TTTGTCACCTATTTCCGGATTTTCATCATTAATATTTTTTCAGAAATATCCCTCAATTATTC  
CCGGGTCGTGGGTAGCCAGTGAAAATTTGAAAAAATAATTGAGGGGAGTTCTTTCGTCT  
CGAAATCAAAATAATATTCATTATTTCAAGCGGTTCTTTTGGGCATTTCATCGAAAGACA  
AATGAAGATAGAATTGGTTCGAATTTGACCAACTGAGATATCTGGGAAAAGTATTTGATT  
ATTTCTTTCACTTGAAACGGGCCCTTATTCTATTCTATTTCTATATTCTTTCTAGATCCA  
AGGACTAAACAATTCAAAAAAAAAAGGAATAGATCCATAGGTTCCATACCTTGTTATAGA  
ACTCATGCTTCATAGAAATATCGGATCAGATAGAGTCGGCGAATGAAGCGGGTTCATTAA  
CAATTCACAGATGAAAAGTGTCAAAAAAGAAAGCATTGACTCCCTCCCGTATCTTGCA  
CTATAGTCTTTTTGCCCCTGGTGGATCTCTCTCATTTAATAAAAGCTGGAACCTTGGG  
TTACTAATTGGTGAATACCGGACAATCCGAACTTTTTTGAATGATATTCAAGAAAAGA  
ACGTTCTAGAAAGATTCTGTAGAATTAGAACAACCTATTCTGTGGATGAAATGATAAAG  
AGTACCCGGAGACACAGATACAAAAGCTTCGTATAGGAATCCACAAAGAGACGATGCAAT  
TGGTCAAAATGCACAACGAAGATCATATCCATATCATTTTGGATTCTCGACAAATATAA  
TCTGTTTTGCTATTCTAAGTGGTTATTCTATTCTGGGTAATGAAGAACTTGTCAATTCTGA  
ATTCTTGGGTTCCAGGAATTCCTCTATAACTTAAGCGACACAATAAAGGCTTTTTCTATT  
TTTTATTAACTGATTTATGTATCGGATTCCACTACCCCGGGGTGGGAACATAATGATTG  
GTTCCGCTACAAAGATTTTGGATTGCTCATAACGATCAAATTATATCTGGTCTTGT  
CCACTTTTCCAGTCATTCTAGATACAATTTTGAATATTTGGATCTTCCATTATTTAAATC  
GTGTATCTCCTTCACTTGTAGTGATTTATCATTCATGAATGAATGAAGAACTCATTG  
TCTGCTGATATCAATCAATCATGATGCTACTTCGTACATAAACAACTGTTTGAAGCT  
TACTACTCTTTTACTTCTACCCGCCAGGGGTTCTTACTATACTTCAGTACAATTAT  
TCCAGTACAATGGCAGAAATCATGGATAGGGAACATAGCTAGCTACCTACCTAATTTATG  
TAGAAATTTCCGGATCAATTATTGGACCATGCAAAATAGAAATACCTTTTCTGGGTAA  
AGAAAGAGATGATCGATTCAATTCCGTATTGATCATGATATATGTAATAACTCGGACAT  
CTATTTCAAATGCATATCCTATTTTTGCGCAGCAGGGTTATGAAAATCCACGAGAAGCAA  
CTGGTCGTATTGTATGTGCCAATTGCCATTTAGCTAATAAGCCCGTGATATTGAGGTT  
CACAAAGCTGTGCTTCTGATCTGTATTGAAGCAGTTGTTAGAATCCCTTATGATG  
AAATGAACAAGTCTTGTCTAATGGTAAAAAGGGGCTTTGAATGTGGGGCTGTCTTA  
TTTTACCCGAGGATTGCAATTAGCTCCCCCGATCGTATTTCTCCGAGCTGAAAGAAA  
AGATGGGCAATCTGTCTTTTCAGAGCTATCGCCCCACTAAAGAAATATTCTGTAGTGG  
GTCCTGTTCTGGTCAGAAATATAGTGAAATCGTCTTTCCATTCTTTCTCCGACCCCT  
CTACTAAGAAAGACGTTCACTTCTTAAATATCCATATACGTAGCGGGAACAGGGGAA  
GGGTCAGATTTATCCCGAGCGGAGCAAAAGTAACAATACAGTCTATAATGCTACAGCAG  
CAGGTATAGTAAGCAGAATAGTACGTAAAGAAAAAGGGGATATGAAATAAGCATAGCCG  
ATGCATCGGATGGACACCAAGTGGTTGATATTATACCTCCAGGACCAGAACTCTTGTTT  
CAGAGGGTGAATCCATCAAGCTTGATCAGCCATTAACGAGTAATCCCAATGTGGGTGGAT  
TTGGTCAGGGAGATGCAGAAATAGTACTTCAAGATCCATTACGTGTCCAAGTTTGTGT  
TCTTCTTGGCATCTGTTATCCTAGCACAAATCTTTTTGGTTCTCAAAAAGAAACAGTTG  
AGAAGTTCAATTGTCCGAAATGAATTTCTAGATCCACGGATTTCATCAAGTTGATAAAAA  
GGGCCGAATTATTGTTGATCAATGCAATTATGTATGATCCAAAAAATATGGAAGCCCC  
TTGTCTTGCTTTGTTATCTGCTTTCTGCGAGATGCCGGGAATTGCTTGATCCCAT  
CCCAGTAATAGTATGTATATTGCGAAGAAGACTACTTGACCTCCCCCTTTTTTTTTTT  
CAATCCAAATTGGAGCGGTGTGACGCTTCTTATTGCCAGATTGTAATGCCACGGAATGC  
ATCAATAGTTTTTTCTATCTAATAGAATCGAATTCTAATAGACAATAGGCGGCATAACAT  
TAAGTAGGAAGAGAATACGCGGCAAGGATAAATGAAAGAATGATTCTGGGAGGGATTAC  
TTGTCTTCCTAATTTTCGACACAAGAAAGGGCGGAAATTCCTTTTCTTGTGTCGAAAT  
AATAATGATTCTTGATCTTGTTCGTCAAAGATTACTGTTTTCTTTCCAGGTCTATCGGA  
ACCTCTTTCTTTAGATTTCATAAGAAGTGGCGGACAAACAAAAAGGGGATGGCTTAGTA  
AACAAATAGAACTTCTTCAACGAACCTATAAAATTTCAAGTAAAAAAAAAATAAAATTT  
AAGATGAGATAATAAATAAGGATTTGGATATGTGCAAAATCCAAGATTTTCCCTTTCA  
ACCGGAACATTAAGAGTCTTTTTTTACTTGATGAAATTTTATTTTATAGA

ATAGAGTAGAGTAAGGTTCAATTAAATTAGTATAGAAATGGTTTGCAGGATGTCTCATCT  
GTAGAAATCCTGTGTCATCCAAAAATAAATTGATTCTCTTCTTCTTGTTCGGAAG  
GGGCCCTCATACTATGGCGGAACAGATACTATGAATCAATCAAGGGATTCCATTTTCAA  
AAACATCATCAGAAACAAAGCATCCTTTTATCATTTCTATGAATCTAATATTATGATAT  
GTTGACTGGATGAATTTCCAACCTTTTTTGATGTTATGGAATAGATCAAACAAAACCTTAC  
CCGAAGAGTAAGAACTCAATAGGACCTTACCCCTCTTTGTCTGATTGCGGGGGTAAGGTC  
CTATTGAGTTCCTACTTTTTCATGTCTACAATCCGGCTCATCCGATTACTATAGGGATGA  
TCCCAATCCGGAATATGAGCCGTAAAAGAAAATACCTATTGAACCGATCACAGGAATACC  
AGTTACAGTACCTATAAGCCAAAGAGGAATCCTTCCAGTAGTATCGGCCATTTACCCACT  
TCCCTCCACATTTTCATCAAGTGGTCGTGCTAGAGACATAAACAGTCATGGATAATTATGA  
GGATGATATCCTTCCGAATGGGATAAGAGAATTCCTACTCTTTTTCTTTATTTTTCTCA  
ATTGAAGAAATAATTGGAAAATAAACAGCAAGTACAAAAATGAGTAATAACCCCAAGTA  
GAGACTGGTACGATTCAATTCAACATTTTGTTCGTTTCGGGTTTGATTGTGTCGTAGCTCT  
ATAATTCGGATTAGGTTTATCGTTGGATGAAGTGCATTGCTGATATTGACCCAAAAAAG  
AAACAGTAGGTACAGTTCAGTCCGTGAACAGCCAACCATCGCACTGTAAAAATTGGATAGG  
TTCGATCTATGGTCATTGAGGCCTCCTAAAAGGATCTACTAAATTCATCGAGTTGTGCCA  
AAGGATCAAAACGACCAGTTATTAATGGAATTCCTTCCGGCTCTCTGTGAAATATTCTGT  
TTGGCCGAGGGCTTCCAAACACATCGTAAGCTAAACCTGTGCTGACGAATAACCAACCCG  
CAATGAATAGGGAAGGTATAGTAATACTATGAATGACCCAGTATCGAATACTGGTAATAA  
TATCAGCAAAAAGAACGTTCTCCCGTGCTTCCAGACATGCTGAGCTCCACATATTTCTGTGA  
CAGTCAAAACAGAGGATCGATTCCGTGAAAGATGGGATCAGTAAATGGAAAATACTGATA  
TTTCATCCTTGTGAGATCGTCAATAGTGTACCGAAGGTGATTATTAGAGTATACCGAATCA  
GTATAGCTATCCTTCCCTCTGACACAGCAATGCATTTTCAATCAGTATCGAAAAGAAATGG  
AATTCCTTTCTTCTTCTTCTTGTTCCTTGTCTATGCAAAACCGCGTGTCAATAGAAA  
ATTCTTAAATACCTGTAATATAGGGTTTCTTTACTGGCTTCGGAATAGAACTGAAGAT  
CTTGGTAAAGTATGAGTCGACGGGTTCTAATAATTTCATGATTATTATATTTCCACAATTC  
AATTAGATGCAAAATTTAGAAACCCCTTTTCATGGTTGTCGAAAAGGTATTTTTTTTTTC  
TAATCCTTTCATTTAAAGTAATTGGTTGGTCGTACAGTAGTAGACAGTAGTAGGTAGTAG  
TAGATGGAAAAACAGAACAAACAGTAGTTGGAACAATTATCAATATTTGTGATGCAACC  
ATTGCTGCATTAGACCCAAAGGTTCTTCTTAACCCAGCTACAAGGATGGGACTGAACTT  
TATGATATGGAAAAGACAGAGTCGGAACCTAAACTAAAAGGATAATAGCAATTGCTAGTT  
TTAGAATGAAGTTGGGCTCGAAATAAAGGTTTTATTTCTTCGAGAAATCATGGGATACTT  
TTCATTTTTCTTCTCGTTTCGAAATATTATGTGCAATTAACCAACCTACTACTGAATACAA  
TTAAGTTAAAAAGTCAAGTAAAGCCGTTATCCGGCTGTTTGTTCAAAATGGATTAGAT  
AAATTGAAAAAGAAACGAAATGATCAAAAAAATGGAATTTTAAATCCAATTCCTTTATAT  
TCTGATAGTTACTCAAAGAGAATTTTCATTTTGAATTGAATGAAGTTACAAGACACAGTT  
CTTATTATTAGTACTTTTACTCACGGGTTGCTCACTGAATCTGTTAATTCGGAAATCATGGG  
ATCTGTAGATGTTACAGGCGACGAATCCATCTTTTTTTTCTACCCCTCTTACTCTCTCTT  
TGTTAGTGCCGTCTATAATGGATGATGAATCAAGAGCTTTCATTGGAAGTGAATCTGTCT  
AATTGGTATTTTTCTTGTTCATTGTATCTCGCAAAAATGGAACCTTAGGTAAGTGCTTTA  
GAACCCATATGTATGAAAAAGAAGATATCTCATTTAGCTCCTCCATGACTACTATAACTAG  
TTATTTCCGGTTTTCTACTGGCTGCTTCAACTATAACCCAGCTCTATGATTAGTCTGAG  
CAAGATACGACTTATTTGAAATTAATTGAATGAACAATTCATAAAAAATGAATATTTCTGT  
GAGATTCGCGTATTCTATAGTTCCTTCCCGCTTAATTGCCAATTCCTGGTTATTGAGA  
TTCATGGCGGATTCGGATTAATATTTAGGGACAGATATTACCTCTCTTTTTCTATTCTTT  
CAAAGAAATTGAAATGATTGAAGTTTTTCTATTTTGGAATTGTGTTAGGTCTAATCCCAT  
TACTTTGGCCGGATTATTTCGTAACCTGCATATTACAAATACAGACGCGGCGATCAGTTGGA  
CCTTTAATTAGTAACATCTCTTTTTTTTAAATTGACCTCCTCCTTAATCTCCAGGAGGTC  
AAATTCAAGTTGCAGTTCAAGTTAGTGAAGTTATTTTATTGTGATTCAACATTTAAAGAA  
CAGAATCACGCTCTGTAGGATTGAACCTACGACATCGGGTTTGGAGACCCACGTTCTA  
CCGAACCTGAACCTAAGAGCGCTTTATTATGATGGGAGATACGGATGTCAAGAAAAGGATTC  
TTTTTGTACCCCAATACATCTTGTATGTATAGTATCATAAAAATGGTAGATTGTGTCCAA  
TTTTAATCGATCTCAATTGGACCCCTCGTTACTGTCCATAGGAGAAGTAATAGGTAGGGAT  
GACAGGATTTGAACCCGTGACATTTTGTACCCAAAACAAACGCGCTACCAAGCTGCGCTA  
CATCCCTTTTCATTTGTTGTACAGTGCCATTGTAGGGAATCCATGTTTTGTTTTCCACA  
TCATAATTTCTCTATCTAAATAGAATTTCTTTTGCCATTTCTCTTTTTTGTTTTTTGG  
TTTCATTTCTATAAAGAATTATATACATAACCTAACGTATAAACGTATAAAGGAATGAAT  
ATTTATCAGTAGTGCTCAGGAAGGAGGTTTCATCTTTTCTGTTTTAGGGACAGGTAGAT  
TTCATCTACCGGATCGTTGTATATATCCATTTTGGTTAGAGATTCCCGGTACAAATGATC  
TTTAACTACATATGCATCTGATCATATATGTATTACAATATACAATAAAGTCAATAAAGT  
GAACTTTAAAGAGGAGGATTTTCAATGCGAGATATAAAAAATATCTCTCCACGGCACC  
TGTGCTAACTACTCTATGGTTCCGGTCTTTGGCGGGTCTATTGATAGAGATCAATCGTTT  
ATTCCAGATGCGTTGACATTTCCCTTTTTTTTTCATTCTAGTTATTGACATGGGAAGGGAT  
CAAGAAGATTAGAGATACAATAAATTTCTGTGACTAACCCCCCTTTTTTCAGTTCTT  
TAGGATAGGAAAGAAAGAGTAAGAATAAAAGTGGATTGAATCTCATCGAACTCGGGTT  
CGGGTTAATATAGGGAGAACAGAAATGGAAATGTGGGTCGAGGCGAGCTGTTCAAGATC

ATACAAGATACTAAATGAAATACTGGGATTGGGAATAATTGATAGTTAGAAATATTTGTA  
TTACTTAATAAATTTGATTACTCTATTGATTGCAACGAAATCTTTCATAATTGAATTGGAT  
TTCGAGTTAGCAACCTCTCGTCTATTTATTTTTCATTCCTTTCTTCTTCGCTTCGGTTCG  
AATCGAAAATAGAGAAATTGAGTGAATTCAAAATCCAAAGGAGGTTTCATGGCTAAGGGTA  
AAGATGTCAGAGTAGTAGTTATTTTGGAAATGTACCAAGTTGTGTCCGAAATGGTTTGAATA  
AAGAATCGCGGGGCATTTCCAGATATATTAATACTCAAAGAATCGACACAATACACCTAGTC  
AATTGGACTTGAAAAATCTGCCCCATTATTGTTACAACATACGATTTCATGGGGAGATAA  
AGAAATAAATCGAACGGAACGCGTGTGCCACTCTTCCAAGGAAGAGGAAGAAATTACATA  
TATATATATATATATATACAAATCCAGTCCTATTTTGGTCGGATCCGAGATGAATGAA  
GAAATAGGATTTTAGAAATAAGAAATAAACCATGGATAAATCCAAGCGGCCCTTTCATAA  
ATCCAAGCGATCTTTTCATAGGCGTTTGGCCCCAATTGGATCGGGGGATCGAATTGATTA  
TAGAAACATGAGTTTAATTAATCAATTTATTAGTGAACAAGGAAAAATATTATCTAGACG  
AGTGAATAGATTAACCTTGAAACAACAACGATTAATTAATACTATTGCTATAAAACAAGCTCG  
TATTTTATCTTCGTTACCTTTTCTTAATAATGAGAAACAGTTTGAGAGAACCGGGTCGAT  
CCCTAGAACTACTGGTCCCTAGAACCCAGAAATAAATAAGCCTATTCCTCTCAAACGAATCA  
AACTCTAATTCGAACTCAGATTGAAGTTTGTTCGAAAAAGCCGAGAGATTGTGCGGCC  
GTAATGTAATAATAAAAAAAGAATGGGGGAAGAATAAATCTTTTTTTTTTATGAAAC  
GTGTTTCGTTTCATTCCTACTACTTATCTTATCATACGAATTTCTACTATACCTCCCGGAG  
TTCATTCTCCGGGAACCTCGTTTAAAGTATTCCAGTGAATTCCTTCCAATCTCCTTATT  
TGATGATCGCAATTGGAATTCGTGTCAAGACAATTCCTATTTGATATGGCTATTGTGTCAG  
GTATTTTACGATTAAGAAGCAACTGCCTCTTGTACAGATCAAGTATTAATCGACTATAAC  
TATGGGATCCCTATTCTCACGAGTTACTGCATTTATCCGAGTGATCCACAACGACGAA  
AACTTCTCTTTCGCGCTGCTCTATCCCGATGAGTGGAACCAAGCTCTCATTTTCTGTT  
GAGTAGTAGTTCGAGTAAGTCTTGAATGAGCCCTCGAAAGGTTGCTGCAATAAACGAA  
TTTTTGTCTACGTTCCGAGCTATATATCTTCGCTAACTCTGGTCATTGAATCAAAAG  
AACTTTTGATGAATAACTAATTGATTTCTTTTCTTTTCAGTCATTTCTTTCCCTCTCCTG  
GTTTATTAATAACAAAACGAGTTCTTCCGATGTATAAAATTAATAACAAATTCGAATGG  
CTTTTGCTACTATAACCTTCCCAACCACGATTTTTTTATTTCTTCCAGGCATTTACCTC  
AAAAAAAAAAAAAGAAATGTACCGATATTAGGTATAAAATAAATCGTAAATGGACA  
AATAGTGGCTTCCATCGTTTCTATGGTTACTTCTTAACCGCGAGGTCCTCTCTATACAC  
CGAGGCCCTTTCTCATTTTCAATGTTATTTGGTAACCTGTACAGTTACGCTCTTTG  
GCTCTACCGATGAATTATCGAGTAATAGGTCTTTTTTCAATGGGATCTATCCATACAGTG  
ACGGCATTTAATTATGAAGGTTGAATAGGTAGCTGACCCTGTTAGTCCGTTCTTGCAAGA  
ATAGGAGCATAATCTTTCTGCTTCTTAAATATCATTCCTCCCGCTTAATGGATAACCATTT  
GCTACCAATGGGAATTGCTTTTCATCTCAAATCGAGGTGATTGGATTTGCACCAATGGAA  
ACCATAAAATCCATACAAATAGAGGTATACGAGAGATCTTTATTTTCGATAGTGAATGG  
AGTTCTTCCATTCTATTCTATTGGTACGAGTCATTGATACTGTAAAAGTCGTCATTTGT  
TCTAGCTCATGATCTGAACGAGTCGCACATACACCCTAGTACATGTTCTCGACGCTGAG  
GACATCCCTGAAGAGCGGGGGATTTTCGTGACATTTCTGATTGGCTGTCTTGTGTTTCTAA  
TAAGTTGTTTAATAGTTGGCATGCTGAATCATATACAGAATGGGCTGGTTTAGATCGATC  
CTAACCGGATGATTATGAATTACTTCTTTACCCAGGTAAGAAGATAAAAGATCAAATAAG  
GGTTCATTCAAATTATGATTTCGAAATGGAATCAAAGATTTATGCGAAATCCCGGATTT  
TCGATCGCTACAAGATCAACAATGCCATAATCTGGGCTTCTGTTGCTGACATAAAAAACA  
TCCCTTTCCATGTCTTCGGATACAACCCATAAAGGATTGCCCGTCTTTGTACATAAACC  
CTGTGTAGGGTTTCGCGGAGTTTCAGTAGTTCTTCCGCTTCCAGGATAAATCTCCTGTG  
GGTGCCTCATAAAAAAGACTAGCAGGTTGATGGATCATAACCTGATGATATAACATAAT  
GAACGATTCCCTCTATCTCGCATGATTGGCGGAAGGGAAGGGATAAAGAATAACAAGCAGG  
GAGAAAAAGATAGAATTGAACAACCGTACAGGCATCTTTTGTGCATACGGCTCTGTAATG  
GAATTTTTTTTTCTCTTTTTTTCATCGAAGAAAGAGACAAGTCGAATCTATCAGACCCAGA  
TCGTTGAATGATCCATTTACCATCCTTCTTTTCGGAATAATCAAAAAATCTATGATGGT  
TCCGTTGCTTTATATATTTATCTCGTCTGTGATTTCAGCAATCCCAAAGTTTCTTTCTGAT  
CCGATCAAATAAAAAATAAGTAAAAATGATCTTTTTTTTTTTTTTATTTTCACACTCTT  
TCATAACATAAATATTGGAAAGAGACTTCTGATGTGGAAGCAAAAAGGTTTGTGACGCTG  
AAATGGACCCCGATACATAAGATCAAGTCGGAATAAACCTTTCTTTCATACTACTATCTC  
GATACATAATCTCATATTATGAAAAATAATAATAGTTTGCTCATATCGAACTGAAATG  
CCATGCTATTATTACTTAATATATTATTTATTTTATTCATATTCCATATGACGAAGGCAT  
AGTCTTTTTTCTCTCAAATAAAAAAATCATTGGCGCCAAGCGTGAGGGAATGCTAGAC  
GTTTGGTAATTTCTCTCCCAACCAGGATGAAAGATCCATTGAAGCGGCTAATCCCATGC  
ATATTGTATGCACATCTGGTGGCACAATTCATAGTATCATAAATAGCTATTCTCGGGA  
TTACCCATCCGCCGGGAGAATTTATAAACAATAACAGATCCCTGGTATCATCTCTATAC  
TGAGATATACCATGAGACCAACAAGTTGATTTCGAGATCTCGTATCAACTTCTTGGCCTA  
AAAAAAGTAATCTTCTCGATGAAGTCGGTTGATTAGGACAAAATTCATTCCTTAGGAA  
CCGTACACGCACCTTTGGGTGCATACGGTTCAAAAAATCAAATTTGAGAAAAA  
AGAAATTTGCTGATTCAGCCCTATTTCTTTTTTTCGTAGCGGGCTTTTTCTTCCATTTTT  
AAGAAACATGAGTTTTGACTTGCTTCCCTATAAAATCAAAAAAGAATTCAGTGAATTTAT  
CGAGCTAACCCCTCATTGATGTATTGTTTCATCGAGATCTAAATCACGATGTAATTTCT

TGTTCCCGAATGGGCCTCTTCCACTCTTTTAGGTTTATGCTCTACTCCGGGTAAAGATCT  
GCCCGAATTCGATTTGCACATATAGGACAAATGATCCCAGTACCACCTCTTTTTTGCATG  
ACTTCTTTTTTTTTTTCAATTTGTTTCATTTTCATGCCTTCCACAAAATATTCGATGT  
ATTCATCATATATTATTCATTAAATGGCAATTTGGGATCACTCATATGGTATAAAGGAATC  
ATTTCTGATAGGGTGGTAATCATACATGGATTACCTTGGTATTTTCTGAACGGAGCCTGT  
ATACTTCATTTTATTGGTCCAAGCCAACCATAAATTCTTTAATTGAGAATATTGATCCT  
CCAACCAAATAAATTGATCTAATTGCACCTTCACGCTTCGAATATTGATGGTCAATCAA  
TCTTTCTTGGGCGAAACAGAGGATATCTCGATCGGGGGAGAGAACGGGGAAATCCCATAT  
GACCAATATGTCTGACAAGTCACACTATACGTCAACCCAACTGCATCTTCTCTCCAG  
GACTCCGAAAAGGTACTTTTGGAACACCAATGGGCATTAAATGAAAGAAAAATGAAGTAT  
TCTATTTCACTTTGATGTGGAACGTAACAAACAATGGTTTATTGTCTTCATAATATTGT  
CGTTTATCGTATTTTATCGATAGATTGGAAGATTTCATAGAGGAAGACGGAATAAAGGAAA  
ATTCTTACGAACGGATCGTTCGAATGAGAAACAAGTATCTATACATTCGCTCACAAAAAA  
TAGGATTAATCCCCCATTTGCGTATTGGTACTTATTGGGTATAGAATAGATCTGCTTCTC  
TTTGTTCCTACGAACAGAATTGTTCAATTATTACTAACGGAACAGAATAAATATTAACCC  
TTGTTTCGAGATAATCCAATGAAAAGGTGAGGTCCATAGCATAGTTATTTCCAATGTGAT  
AAAGTTACATAGTATCTATTTTATCTTTGAGAAAGGGGTATTTCCATGGGTTTGCCTTGG  
TATCGTGTTCATACCGTCTGATTTGAATGATCCCGGTTCGGCTGCTTTCTGTCCATATAATG  
CATACAGCTCTAGTTTCCGGTTGGGCCGGTTCGATGGCTCTATACGAATTAGCAGTTTTT  
GATCCTTCTGACCCCGTCTTGGATCCAATGTGGAGACAGGGTATGTTCTGTATACCCCTC  
ATGACTCGTTTAGGAATAAACAATTTCATGGGGCGGTGGAGTATTACAGGAGGAACATA  
ACGAATCCGGGTATTTGGAGTTACGAAGGTGTGGCCGGGGCACATATTGTGTTTTCTGGC  
TTGTGCTTCTTAGCAGCTATCTGGCATTGGGTGTATTGGGACCTAGAAATATCTGTGAT  
GAACGTACGGGAAAACCTCCTTGGATTGCCCCAAGATTTTGGAAATTCATTTATTTCTC  
TCAGGGGTGGCTTGCTTTGGGTTTGGCGCATTTTCATGTAACAGGCTTGATGGTCTTGGA  
ATATGGGTATCCGATCTTATGGCCTAACCGGAAAAGTACAATCTGTAAATCCAGCGTGG  
GGTGGGAAGGTTTTGATCCCTTTGTTCGGGAGGAATAGCCTCTCATCATATTGCAGCA  
GGTACATTGGGTATATTAGCAGGTCTATTCATCTTAGTGTCCGCCACCCCAACGTCTA  
TACAAAGGATTACGTATGGGCAATATTGAAACTGTCTTTCCAGTAGTATCGCTGTCTGTC  
TTTTTTGCAGCTTTCTGTTGTTGCTGGAACATATGTGGTATGGTTCAGCAACTACCCCGATC  
GAATTATTTGGTCCCACTCTTATCGAGTGGGATCAGGATACTTCCAGCAAGAAATATAT  
CGAAGAGTTGGCGCCAGTCTAGCCGAAAATCTGAGTTTATCGGAAGCTTGGTCTAAAATT  
CCCGAAAAATTAGCTTTTTATGATTACATCGGTAATAATCCGGCGAAAGGTGGATTATTC  
CGGGCAGGCTCAATGGACAACGGGGATGGGATAGCTGTGGATGGTTAGGACACCCTATC  
TTTAGAGATAAAGAAGGGCATGAACTTTTTGTACGCCGTATGCCTACTTTTTTTGAAACA  
TTTCCAGTAGTTTTTGGTGGACGGAGACGGAATTGTGAGAGCCGATGTTCTTTTGAAGG  
GCAGAATCGAAGTATAGTGTGCAACAAGTGGGTGTAACCTGTTGAGTTCTATGGTGGCGAA  
CTCAATGGAGTCAGCTATAGCGATCCTGCTACTGTGAAAAAATATGCTAGACGTGCCCAA  
TTGGGTGAAATTTTTGAATTAGATCGTGCTACTTTGAAATCCGATGGTGTGTTTTCGGAGC  
AGTCCAAGGGGTTGGTTCACTTTTGGACATGCTACGTTTGCTTTGCTCTCTTTTTTCGGA  
CACATTTGGCATGGCGCTCGAACCTTGTTTCAGAGATGTTTTGCTGGGATTGACCCAGAT  
TTGGATGCTCAAGTGGAAATTGGAACATTCAAAAACTTGGAGATCCAACATAAGGAGA  
CAGGTAGTCTGATACAACATTGCTCCGGTATCTTTCGCCTCTATATTTGATTTTTTTGAT  
TTGACATAAGGTACCGTAGAAATATTGATTTGAATCATCGCCTTCTTTGCTCTTGCTCCT  
TTCTTTATCTGGGAAATAATCCTAAATGAACAGGTGTGGAAGCTATAATTGTAAACACG  
ATCGAATCTATGGAAGCATTGGTTTATACATTCCTCTTAGTCTCGACTTTAGGGATAATC  
TTTTTCGCTATATTTTTTCGAGACCCGCTAAGGTCCCGACTAAAAAGACGAAATGATTT  
TTCATTATCTTAATTGAAGTAATGAGTCCCCCATATGGGGGACTCATTACTTCAATTAGT  
CTCCGTGTCTCTGAATGGATCTCTTAGTTGTTGAGAGGGTTGCCCAAAGCGGTATATA  
AGGCGTACCCCTGTAAAGCTTACAAGTGAACCAGATATGGAGATGGCGACTAAGGTTGCTG  
TTTCCATTATTAGAGAATTTCAAGACCACGATGGATCTATGCTACGATAAGATCGTTTAT  
TTACAACGGAATAGTATACAAAGTCAACAGATCTCAACCAATGCAATAGTATTTATGGCT  
ACACAAACCGTTGAGGTTAGTGTAGATCTGGGCCAAGACGAACTATTACAGGGGATTTA  
TTGAAACCATTGAATTCAGAATATGGTAAAGTGGCTCCTGGATGGGGAACACCCCATTT  
ATGGGTGTCGCAATGGCTCTATTTGCGATATTCTATCTATTATTTTAGAGATTTATAAT  
TCTTCCGTTTTACTGGATGGAATTTCAATGAATTAGGTCCATAAGAACCAGAAGCCCTAG  
CTTTTCAATCAAAAATGAATCACTTAGGACTCAGATTTATAGTCCATTCTGGTAGTTTGA  
CCGTGGAATTCGGTTGTTCCGTTATTTCCGGAATATGAGTGTGCGACTTGTGTTATAATTGA  
TCCTATTGATAGTACAGAGAATGGGTCTGTCTATCTCGACAGAGATGGTTCTGCCTCGTCG  
GATATTCATCCTAGTATCTGGAGCACGGAATATATGGAATAGATCAAGAAATATTTGAAC  
TATGATTCATACCTACTATTTCAGACCTCGTGACTGGACTTCAAAAAATTTTCAAACAAAG  
AGGTATTTGATAAATTGAACGATTTTCTTCTCTTGAATCATGCTTATTTTGACCGAAG  
GACAAATCTTCTCGGATTTTGTAGTCATTACATCTATGAATAAGTGATGATCAAATAGT  
TCTTACTCATAGAACCTTGGTCTTAGTTTTTGGGTTTTATTGAATCATCGTGGTTCTAG  
TATGAATCTGAGGTTTCAATCGATTATAGGGTCTCAACAAGAGAATTCCTATCAAAAA  
AAAATAGTAAACAATAGTCAATCTGCATTACGCACAAACAAAAACAACAATCAAATAAC

AAATAAATAGGGGAATAGAAGATTCAAGAGGCCTGTAACGATCAACATAAAGACAGATGA  
GCTAAC TTGATATTTTGGCATTCTCATCACAACAAAGAAGAGAGTTCCGGATTTTGGTTCC  
TTCGTATCTTCAGAGACGATTGAATCAAGTGGATAAAATAAGAAATTTCAAATTTCTATT  
ACATATCCATTGTAACTCAGTATTGGGTGTTTTCTGCTTGAGCCGTACGAGATGAAATCTC  
CATATACGGTTCTCAGAGGGGGAGTCCCCTTGGTTTACCTATCTCAATAAAGTATATGAT  
TGTTTCGAGGAGCGTCTCGAGATTCAGGCGATTGCAGATGATATAACTAGTAAATATGTT  
CCTCCTCATGTCAATATATTTTATTGTCTAGGAGGGATCACACTTACTTGTTTTTTAGTA  
CAAGTAGCTACGGGTTTTGTCTATGACTTTTTACTATCGTCCGACCGTTACGGAGGCTTTT  
GCCTCTGTCTCAATACATAATGACTGAAGCCAACCTTGGTTGGTTAATCCGATCAGTTCAT  
CGATGGTCAGCAAGTATGATGGTCCTAATGATGATCCTACACGTATTTTCGTGTGTATCTC  
ACGGGGCGGATTTAAAAAACCTCGCGAATTGACTTGGGTTACGGGTGTGGTTCTGGCTGTA  
TTGACTGCATCGTTTGGTGTAAC TGGTTATTCCCTTACCCCGGACCAATCGGTTATTGG  
GCAGTAAAAATCGTGACAGGCGTACCTGAAGCTATTCCTGTAATAGGATCACCTTTAGTA  
GAGTTATTGCGTGGAAGTGCTAGTGTGGGTCAATCTACTTTGACCCGTTTTTATAGTTTA  
CACACTTTTGTATTACCTCTTCTTACTGCCGATTTTATGTTAATGCATTTTCCAATGATA  
CGTAAGCAAGGTATTTTCAAGTCTTTTATAGAGAAGACAGATCATAGATATTTGTAATCGA  
TCATATATAATTTCCGGGAGGAACAATAGTGTTTTATTGCTACAAATATGGATTATTGAA  
AAGAATAAGACATCTTTTGGATATTTCTCTTCAACTAACTACGAAGTATTGTATTCTTT  
ATTTGATACGAATAGTTGAAGTACATTTCTCCGAAGAGAAGATGGATTATGGGAGTGTGTG  
ACTTGAAC TATTGATTGGGCCGTGCAGATATATGATTTTATCCGCCACATTGGAATTCAC  
AACCAATGTGTCTCTGTTCACACCACGCGTAGGTCCCCCTACAGAGGATAGGCTGGTT  
CGCTTTAGGAGAATCTTTTCTATGATCAGACCAATCATGTTATGTTGTGCATGAACGGG  
CTCCGTAAGATCCCAATAGAATAAAATAAAATGAAGTAATGTGGCATGATCCAGATTATGT  
TTTATCTATTTACTTAAAGTATGGAAATGCATTCATTTCCCTCTGCATCGATCCCAATCTA  
TGATACTATCGGAGTGAACAAGGGATCTAAGGAAGACATAGGCTAGACTTTATTAGTA  
ACAAGGAAATCCTTTGTATTTAAGAAGACTCGAGATATGTGGGGATAAACACTAATCACA  
AAGCATGAGACCATCCAAAAAGCATTTGATCATGATCAAAATTTGGAAGCCTACTTGGGTA  
TTGAGCATTTACTTGTAAAGAACTGAATTCCCTTGCAATGGGTAGTTGCAACCCCGTAAAT  
TGAATCCGGTAAATCTTTTCTTACATAGAGTCATATATGTGTGGATGATATATCTATTTT  
ATATGGACCCGTTTTATTCTTTTGATTCTTGCTCGAGCCGGATGATAAAAAATTATCATG  
TCGGTTCCCTTCGGGGGATGGATCTATAAGAAAGAAATTCACCTATCCCAATAACAAAGAA  
ACCTGACTTGAATGATCCTGTATTAAGAGCTAAATTGGCTAAAGGGATGGGGCATAATTA  
TTACGGAGAACCCGATGGCCCAATGATCTTTTATATATTTTTCCAGTAGTCATTCTAGG  
CACTATTCCGTGTAACGTAGGTCTAGCGGTTCTAGAACCGTCAATGATGGTGAACCAGC  
GGATCCATTTGCAACTCCTTTGGAAATATTACCCGAATGGTACTTCTTTCCCGTATTTCA  
AATCCTCCGTACAGTACCCAATAAGTTATTGGGTGTTCTCTTAATGGTTTTAGTACCAAC  
GGGATTATTGACAGTACGTGTTTCTTTTGGAGAATGTTAATAAAATCCAAATCCATTTCCGTCG  
TCCAGTAGCTACAACAGTTTTTTTGATCGGTACCGCGGCAGCCCTTTGGTTAGGTATTGG  
GGCAACATTACCTATTGTATAAATCTCTAACTTTAGGCCTTTTTTAAGTTGATTAAACCGT  
GAAATACTACGCGTATGTATCTAGGGAATAGTCACTTCTAAAGTGAATCTCCCTAGATA  
CATCTCTTAAATTTCAATATCAATCCATTCTGGATATAGAGATGATACTAAGGATTCAAA  
AGCCATTTTCTTCTTTCTTTCTTTTCAAAAAAGATGAAATAATACCATGGATTTAAAC  
TTATTCTTAGGTAATAAATTGCAAAATGCTTCTGTAGAATGTCCAATATCTGTTTTACA  
TCTTCTATGCGAAGATGTTCAATTCTCATAAGATCTTCTTGACTGTTATTCAAAGGTCC  
AATAATGTATGTATATTGGACCTTTTGAGACATTATAGGTCTGGAGGGCAATTCTGAT  
TGGTCAATAAAAAATACATTTCAAGTGCAATTCCTTTTTTGTTTTTCTTATATTAGCCAAT  
CTATCATGAAAAAGTAAAAACGATACAGTAAACCTGTTTTGATTGTCTTCTAAATAAAAA  
TGAATGTCTCTTCTCCGCGATGTAGAAAAGGAATAAATAAGTCAATCAAAGTACGGGAA  
GCTTCGCGAAGTGCTTCTTTAGGAGTTAAACTTCCATTCGTCCATATTTCAAGAAAAAGT  
ATCTCTTGTCTTCATTCTCACTCCCATAGAATGAATACTATGATTGCGATTTCTGAACA  
GGCATGGATACAGCATCTATAGGATAACTTCCATCTTGATAGTTATTGGGGGATTTTATA  
CGATATCCGCGATCCCTCTCGATTTTGAATTCATAACAAATGAATTGGCTCCGTCAGA  
TTAGCTATATGCTGTGTAGTATCGACTAGTTCCACAGAAGGCGGTGAGATGATATCTTGA  
GCAGTTACGTATTTAGGACCCCTGACGCAAAATGGATGCGTCACGAGTTCCATACAGATTA  
CTTCTCAATACAAATTTCTTTCAAATTCATTAAAATTTTATGTACTGATTCTTCAATACCA  
ACTATCGTAGAATATTCTATGTGATACCTTCTCAGATTTTGCACGTGTGATACATGTTCCC  
TCTATTTCTCCGAGTAAAGCCTTTTCGCATCGCGATACCTATCGTATCTGCTTGACCTTTC  
ATAAGCGGGACAGAACGAAACGGCCATAATAAAGACGCTTACTGTCTGTTCTTGATTA  
ACACACTTCCACTGTAGTGTTTCGAGTGGATACTGCTACTTCTTCTCGAACCATACTAATA  
TTATTGTTTGATCAGATCATTGAATCATTTATTTCTATGCAATCCATTCATTTTTATT  
TCTACACACGTCTTTTTTTAGGAGGCCATACATCCATTATGTGGCATAGGGGTTACGTCAC  
GTACGAAACTTAATAGTATACCACTTCTACGAATGGCTCGTAATGCTGCATCTCTCCGA  
GACCAGGGCCTTTTATCATGACTTCTGCTCGTTGCAGACCCGTATCCACTGCCTTACGAA  
TAGCATTTCTGTGCTGCGTTTTGAGCAGCAAAATGGTGTCCCTCTTCTTGTGCCTCTGAATC  
CACAAGTACCAGCGGAGGACCAAGAAACCCCGACCTATTACATCTGTAACAGTCACAA  
TGGTATTGTTGAAACTCGCTTGAACATGAATAACTCCTTTTTTGTATTCTACGTCCATTCT

TACGTGAACCAATTCTTGGTATAGCTTTTGTGCATATTTTATCATCTCATAAATATGAGTC  
AGAGATATACGGATATATCCATTTCATGTCAAACAGATCCTTTATTTGTACATCGGACC  
GTTTAGAAAGTCCCTTGTAGAAAGATTACCCCTGTCTCTGTTTATGTTTCGGATTGGAA  
CAAATTACTATAATTCCGTCCTCCCGCCTACGGATCAGTCGACATTTTTCACAAATTTTACGA  
ATGGAAGCCCTTATTTTCATATTTGTTATTCCTTAATTCAAATATACTCCTTGAAGAA  
AATAAGTCTCTTGAAATTTTGAACCTCGAATTGTATTTCCCATGAAAGGAATGTTTAAATT  
CAAATAAAAGCCGCTAATCATTCGACTCTTTGTTGCGAAGTCTATAAATATACGTCC  
CCTAGTTGAATCATAACGACTTACTTCGATTTTGACTCTATCTCCTGGTAGTATCCGGAT  
AAAACCTCCGTCGGATCCTCCCGAAACATAACCTAGAATCAGATCTTCATTGTCTAAACG  
AACTCGGAACATACCATTGGGAAGTGATTTCAGTAATTAAACCTTCGTGAATCAATTTTGT  
TTCTTTTCATTCCAGGTAACCCCTTGAAGTATCAACTAATGGAGGAGGAGTAATAGTAGA  
CAATTCGTCTTTTCTCTCTTTTTTCCCAAATAGCAAGTTACGGATCAAATTCGGATACCAG  
AAGGATCACCAGATATAATACAAATTTCTCCCCCAATTCTTTCTAGTCGAGCTTCTCGA  
TCTGTCAATTATACCTCGAGAAGTAGAAAGAATTACGACCCCATTCACCTAAAATCCTA  
GGAATTCGTTGATGGTTGGAAATAGATTTCGTAGACCGGGACGACTGATACGCTTTAAATA  
TTTCTATATGTTCCCTTCTCTATCTGTCGAGGGTTGAAACCAAGAAATATTTG  
TTGTTTTCCCTATGTTTCTTAACATTTTCAATAAACCTTCTTGTAGAAGTATTTTAAACA  
ATGTTTTCGGCGATATTAGTAGATGCTACTCGAACCGTTCCTTTTTATCCATGTTAGCA  
TTTCTTATAGAAGTTATTATATCGGCAATAGTGTCCCTACCCATGACGAACTAAATTTAT  
GGGTGCCCTTCCAGTTTTCGATATAAATCAACATGTTCCCTTTTTTTTTTTCATTTTTTCTTAT  
TTATTTATGAATTATTAAGGTATATGCGTGAGACACAATCTACTAACGTGATCTATTTTC  
AGAGACCTGACTATACTCTATCACGGTCTCATCTACTAGTATTTATAAGACTTCAGGAGC  
TAATGAGACTATTTTAGTGAAATTCAACTGTCTCAATTCCCGCGCGATCGCTCCAAAAAC  
TCGAGTTCCCTTTGGATTTCCTTCTGATCAATGACAACCTGCTGCATTGTCTCATATCG  
TATTATCATACCGTTGTGCGCTTGTAGTTCTTTACATGTACGTACAATTACAGCTCTGAT  
CACTTCTGATCTTTCGAGAGGCATATTGGGCACTGCTTCTTTGATTACAGCAACAATAAC  
GTCACCAATATGAGCATATCGTTGATTACTAGCTCCTATGATTGCAATACACATCAATTC  
TCGAGCCCGCTGTTGTCCGCTACATTCAAATGAGTCTGAGGTTGAATCATATCATTTTTT  
TTTTTTTTTGAATCTGCTCTTTCAATGCAAAAGGCAAGGAAAAAGAGAGAAATATTTGT  
CTGCCCAGAAATCCAAAAATCTGCGATTGTATTTTTTCATCACAAATACCCTTCACATACC  
TATCACGGGATAATGAATGTAGTTTCGTATAGGCATTTTGCACGCAGCTATTGAAATAGCT  
GCTCTGGCTACAGTTTCTGATACTCCGCCCATTTCATAAAGTATTCGACCGGGTTTAAACG  
ACAGATACCCAATATTCGGGAGATCCTTTCCCGAACCCATACGTGTTTCGGTAGGTCTT  
ACTGTAACGGGTTTGTCCGGAAATATACGTACCCATATTTTTCCACCACGGCGTGCAAT  
CGTGTCAATTGCTCGTCTGCTTCTATTTGTCTAGATGTGATCCAAGCGGGTTCAAGT  
GCCTGAAGAGCGTATCTGCGAAACAAATATGATTGCCTCGATAAGATATTCCTTTCATT  
CTTCTCTATGTTGTTTACGGAAATCTGGTTCTTTTGGGGTTATAGTTGATGGTTGTTTCT  
CAATCCCATCTCTACTGCAGAACCGGACATGAGAGTTTCTTCTCATCCAGCTCCTCGCGA  
ATGAAACGATTCAATAAGATTACGTATATGTATTTATTGAATGAATAATACACTGAATCA  
TGGAATTTCTTGATATTTAATCTGTACACGCGGAAGCCGTATAGTATATAGTATATACGG  
CTAGACGGATATTTCTATTTTATTTATATGGGATAATGCCTTTCTTTTGAAAAATGAATCC  
TTGACCTTTACCGAATCTGTCAAAATACTACAATCCAAATATGGTTTCGCGGGCGAATAT  
TGACTCTTTCCATATTTGCTTCATTTCGTAGGGTGAACCCATGACCTATCAGAAGAAATTA  
ATTGGTTCTGTTGATTCCGCCATCCCACCAATGAATCATTAGGATTCGTTTCAATA  
GAATCTTCCGAGTCAAGGTTTCGTCTGTTCCCATAGCTTTTCCATTAATGGCTAGGCCT  
GAACTATGCAATGGAGCTCCTAATTAATTCGTTCCCGAGCCAATCTCCTCAGTCTCTAT  
TGACTCGGGGCTCTTTATTTGATTTTCTTATGAACCGTATTTCATCTAATTATGGA  
CGAATCAGTATTGATGCTTTATCACACTGCCTTTTATGATATGATGTGATTGATAGACCA  
TACATATTGGAATCATATATCATGGAGATTCTCCTTCTCTCTTCTCTCGCCCTTCCAGT  
TACCCACATCCCTCTATTTTCTTTCCAACCTATAAATGGATTTTTCCTTTATGGAAAA  
AAAAGATTTTCAGTTGCTACAACATATGATCGATACATCATATGGCGACTGCTTCCTTGG  
ATCTCGATAATACAAAGCAATGAGTTGGTTACTAGTTCTTATAGTTATTAGTTAGGGGCT  
GGTCTGTTTTTTGAATCCCAACTTTAAATAAAAAACCAACGAGTCACACACTAAGCATAG  
CAGTTCCACCAAAAGGTCAATCGAATTTTTATTCAACCTTATAGAATTAGAATTGCTCAT  
TTTTCATTTTTTTTTTTTATTGAAGTGAAAAGGAATAGTTTGTAGTTTTTGTCTATCAC  
TGAATAGAATGGCAAGCAAAGGAAGGGTCCATTATTGCTCGTCTACAAATATCCAAATTT  
TGATGCCCAATGCCCCATAGGCAGTTCGAACTGTATAGGAACAATGATCAATTTTAGCTC  
GAATGGTTTGGAGGGGAACCTTACCTTCTCTGATCCATTGACACGTGCAATTTCTTTTC  
CGTCGATACGCCCTGCAATTTCCACTTGAATTCCTTTTGTGCTGCTGTTTTCAGTTAATT  
CAATAGCTTTTTTCATTGCTTTTCGAAACGAAACCTATTCTTTAATTGTAGAGCTATAT  
ATTCTGCAAGAAATATTAGGTTGTCCATAAGGTTTTCGAACTCTGTAAATAGCAATGTTAA  
GTCTCCGATTACAGAATGAAGCCCTTTTGTACATTGATCTGCAATTCCTTCGATTCCCTC  
GTGTTTGGCCTTCTATTAACAAATTTGGGAATCCAATATAGATTATGACCTGGATCAAGT  
CCATTTTTTTTTGAATCTCTATATGTGCAATTCGAATTCCTTCGAACTTGAAAGATACTC  
TTATATTTTTTTGTACATATATCTTGATCCAATCCCGTATTTTTTCATCTTCTGGAGAC  
CTATGTAATAACTTTTTTGGTTGTGCGAACCAGGGAACGATGACTTTGGTTTTCGCCAA

[illegible]

TCCGCCAAGATCTCTTCGTTATTGGGGGGAAGAATCGGCACAAATCGGATTTTTTGAGGA  
ACGTCTCGAGAGAGAATTTGATTGGTTAGACAATGCGTGGTTGGTAAACAGGAATCGGG  
TTTTTAGCAAGGTACGGAATGTATCGTCAAATATTCAATATGATTCCATAAGATCCATTT  
TCTTTCAAGTAACGGATTCTAGCCAATCGAAAGGATTTCTGATCAATCCATAGATCCTT  
TCAATTCATTAGTAATGAGGGTTCGGAATATCACACATTGATCAATCAAACGGAGATTC  
AGCAACTAAAAAAGATCAATTCTTTTAGATACTTCTTTCTTCAAACGGAACGAACAG  
AGATAAAATCAGATCGATTCTCAAAATACCTTCCGGATATTCTCAATGGCTCGGCTAT  
TCCCGAACGTGAGAAGCAGATGAATAATCATCTGCTTCCAGAAGAAATAGAAGAATTC  
TTGGGAATCCTACAAGATCAATTCTGTTCTTTTTTCTCTGATAGATGGTCAGAACTTCATC  
TGGGTTTGAATCCTACCGAGAGGTCGACTATAGATCAGAAATGTTGAAGAAACAACAAG  
GTGTTTCTTTTGCCCTTCGAGGCGATCGGAAAATAAAGAAATAGTTGATATATTCAAGA  
TAATTACGTATTTACAAAATACCTCCTCAGTTCATTTCGATTGCAGCAGATCCGGGATGGG  
ATATGGTTCGGAAGGATGAACCGGATATGGACAGTTCGAATAAGATTCATTCTTGAACG  
AAAATGCATTTTTTGATTATTTTCATCTATTCCATGATCGGAACAAGGGGGGATACAGGT  
TGACCCACGAGTTTGAATTAGAGAGACATTTCAAGAAATGGCAGATCTATTCACTCTAT  
CAATAACCGAGCCGGGTTAGCCTATCATAATAAGGAATTTGGCTTGCTATTGATTCCCT  
ACGGAAAATTATTGAATGAGGTATTCAACTCCGGGGATGAATCGAAAAAGAAATCTTTAT  
TGGTTCACCTTCCATTTTTTATGATTATTTTTTATTGGTTCTATCTCTATTTTTTATG  
ATTTATTTTTATTGGTTCTACTTTCTATTTTTTATGATTTATTTTTATTGGTTCTACTTT  
CTATTTTTTATGAAGAGAAATGAATCTTTTTTATCGAAAGATAAAAAAATCGGTCCGGA  
TCTCCTGCGGGAATGATTGGAAGATCCAAAACCAAAATAGCGGTATTTGCTCACAACA  
ACATAATGGAGGCGATCCATCAATATAGATTGATCCGAAATCAGATTCAAATCCAATATA  
GTACCTATGGGTACATAAGAAATGTATTGAATCGATTCTTTTAAATGAATCGACCCGATT  
GCAACTTCGCATATGGAATTCAAAAGCATCCCATAGGAATTCAAAAGCACCAATAGGAA  
ATGATATTCTGAATCATCTAACTATAATAATAGATAAGATCAACCAACATTTATCCAATT  
TGAAAAAGATTAAAGAAGAGTGGTTCGATCCTCTTATTCTCGAACCGAGAGATCCACGA  
ATCTGGATCCTAATGTATATAGATACAAATGTTCCAATGGAAGCAAGAATTTCCAGGAAC  
ATTTGGAGCATTTTCGTTTCTGAGCAGAAACACCGTTTTCAAGTAATGTTCGATCGATTAC  
GTATTAATCAATATTCGATTGATTGGTCCGAGGTTATCGACAAACAAGATTTGTCCAAGT  
CACTTCGTTTCTTTTGTCCAAGTCACTTCTCCTTTTGTCCAAGTCGCTTCTCTTTTTAT  
CTAAGTCACTTCTCTTTTTCGTTGTGAGTCTCGGGAATATCTCCATTATAGGGCCGAAA  
TCCACATCTATGAATTGAAAGGTCTGAATGATCAACCCGGCAATCAGTTGTTAGAATCAA  
TAGGTGTTCAAATCGTTTATTTGAATAAATTGAAACCTTCTTATTGTATGATCATGATA  
CTTCCCAAAGATCGAAATTTTTAATCAATACAGGAACAATATACCTTTTTTGTTCACA  
AGATACAAAAGTGCATGATTGACTCATTCGGTACTAGAAAAAATCGCAAGAAATCCTTTG  
AGAACACGGATTCCATTTCTCAATGATATCCACGATCGAAACAATTGGTTGAATCCTC  
AGAAAAGTTCAATGATATCTTCTTTTTATAGAGCAAAACAGACTTCAATTCTTGAATCATC  
CCCATTGCTTCTGGTTCTATTGTAACAAAGGATTCCATTTTTATGGGGAAAAGACCCGTA  
TCCATAATTATGATTTTACATATGCACAATTCCCAATATCTTGTGCATTTCGCAACAAAA  
AATTTTCTTGTGTTTCGGTAAAAAAAACATGTTTGGGAGAGAGAGACTATTTCCC  
CAATTGAGTCACAGGTATCTGGCATATTCATACCTAACAAATGTTTCACAAAGTGGTAACA  
AAACGTATAACTTGTACAAATCTTCCATTTTTCAATTCGATCTGATCCATCCGTTCCCTA  
TTTACTCGATTGCAGACATTTTCGGGAACACCTGTAATAGAGGAACAAATAGTCAATTTTG  
AAAGAACTTATTGTCAGCTTCTTTCAGATATGAATCTATCTGATTGAGAAGGGAAAACT  
TGCATCACTATCTCCGTTCAATTCAACATGGGTTTGATTACACTCCATGTTTTGAGA  
AATATGTGCCGTCCGGAAGAGGAAAGAACTGAGTCTATGTCTAAAGAAAAACGTTGAGA  
AGGGGGAAGTAGGTAGAACCCCTTCAACGAGATAGTGCTTTTTCAAATCTCTCAAAATGGA  
ATTTGTTCCAAACCTATATGCCATGGTTCCCTTACTTGGACGGGGTGAAATATCTTTATT  
TCACCTTAAAAACAATATTTATTTGATATTGAATATTCCTTTCAATATTCCCTAAGTG  
GCAGTCAAAATTTTGTGTCGTTTTCATGATATTATGCATGGATCAGATATATCATGGC  
CAATTCCTCAGAAAAAGTGGTGGTCGATTCTTCCACAACGGAATCTGATAAGTGAGAGTT  
CGAGTAAGTGTTCACAGAATCTTCTTCTGTCCGAAGAAATGATTATCGAAATAATGAGT  
CACCCATTCCATTGATATGGACACATCTGAGATCACCAATGCTTGGGAGTTCCTCTATT  
CAATTCTTTTCTTCTTCTTGTGCTGGATATCTCGTTCGTACACATCTTCTCTTGTGTTT  
TCCGAGCCTCTAGTGAGTTACAGACAGAGTTAGAAAAGATCAAATCTTTGATGATTCCAT  
CATACATGATTGAGTTGCGAAAACCTTCTGGATAGGTATCCTACATCTGAAGTGAATCTT  
TCTGGTTAAAGAATCTCTTCTAGTTGCTCTGGAACAATTAGGAGATTCCTCTGGAAGAAA  
TAGGGGATTCTGCTTCTGGCGGCAACATGCTATTGGGTGGTGGTCCCGCTTATGGGGTCA  
AATCAATACGTTCTAAGAAGAAATATTTGAATATCAATCTCATCGATCTCATCAGTATCA  
TACCAATCCCATCAATCGAATCACTTTTCGAGAAATACGAGACATCTAAGTCGTACAA  
GTAAAGAGATCTATTCAATTGATAAGAAAAAGAAAAACGTGAACGGTGATTGGATTGATG  
ATAAAATAGAATCCTGGGTGCGGAACAGTGATTTCGATTGATGATGAAGAAAGAGAATCT  
TGGTTCAGTCTCCACCTTAACGACGGAAGAAAGGATTGATCAAATCTATTGAGTCTGA  
CTCATAGTGATCGTTTTATCAAAGAATGACTCTGGTTATCAAATGATTGAACACCGGGAT  
CCATTTACTTACGATACTTAGTTGACATTCAAAAAAGTATCTAATGAATTATGAGTTCA  
ATAGATCCTGTTTAGCAGAAAGACGGATATTCCCTTGCTCATTATCAGACAATCACTTATT

CACAAACCTCGTGTGGGGCTAATAGTTCTCATTTCCCATCTCATGGAAAACCCCTTTTCGC  
TCCGCTTAGCCCTATCCCTTCTAGGGGTATTTAGTGATAGGTTCTATAGGAACTGGAC  
GATCCTATTTGGTCAAATACCTAGCGACAAACTCCTATGTTCCCTTTCATTACGGTATTTTC  
CGAACAAAGTTCCCTGGATGACAAGCCTAAAGGTTATCTTATTGACGATATCGATATTGATG  
ATAGTGACGATATCGATATTGATGATAGTGACGATATTGATGATGACCTTGATACGGAGC  
TGCTAACTATGACGAATGTGCTAACTATGTATATGACGCCGAAAATAGACCGATTTGATA  
CCACCCTTCAATTAGAAATAGCAAAAGCAATGTCCCTTGCATAATATGGATTCCAAACA  
TTCATGATCTGTATGTGAATGAGTCAATTACTTATCCCTCGGTCTATTAGTGAACATATC  
TCTCCAGAGATAGTGAAAGATGTTCCTACTAGAAATATTCTTGTATTGCTTCGACTCATA  
TTCCCCAAAAAGTGGATCCCACTCTAATAGCTCCGAATAAAATAAATACATGCATTAGA  
TACGAAGGCTTCTTATTTCCACAACAACGAAAGCACTTTTTCTATTCTTTCATATACTAGGG  
GATTTTCACTTGGAAAAGAAAATGTTCCATACTAACAGTAACAGATTTCGGGTCCATAACCA  
TGGGTTCCAATGCACGAGATCTGTAGCACTTACCAATGAGGCCCTATCAATTAGTATTA  
CACAGAAGAAATCAATTATAGACACTAATACAATTAGATCAGCTCTTCATAGACAAACTT  
GGGATTTGCGATCCCGAGTAAGATCGGTTCCAGGATCATGGGATCCTTTTCTATCAGATAG  
GAAGGGCTGTGTCACAAAATGTACTTCTAAGTAATTGCCCCATAGATCCTATATCTATCT  
ATATGAAGAAGAAATCATGTAAGGAAGGGGATTCCTTATTTGTACAAATGGTACTTCGAAC  
TTGGAACGAGCATGAAGAAATTAACGATACTTCTTTATCTTTTGAGTGTGTTCTGCCGGAT  
CGGTCGCTCAAGATCTTTGGTCTCCACCCGGACCCGATGAAAAAATTGGATCACTTCTT  
ATGGATTCGTTGAGAATGATTCTGATCTAGTTTCATGGCCTATTAGAAGTCGAAGGCGCTC  
TGTTGGGATCCTCACGGACAGAAAAAGATTGCAGTCAGTTTGATAATGATCGAGTGACAT  
TGCTTCTTCGGTCCGAACCAAGGAATCAGTTAGATATGATGCAAAACGGATCTTGTTCTA  
TCGTTGATCAGAGATTTCTATATGAAAAATACGAATCGGAGTTTGAAGAAGGGGAAAAGAG  
AAGGAGCCCTCGACCCGCAACAGATAGAGGAGGATTTATTCAATCACATAGTTTGGGCTC  
CTAGAATATGGCGCCCTTGTGGCAATCTATTTGATTGTATCGAAAGGACCAATGAATTGG  
GATTTCCCTATTTGGCCAGGTCACTTTCGGGGCAAGCGGATCATTTATCATAAAGAGGATG  
AGCTTCAAGAGAATGATTTCGGAGTTCCTTGCAGAGTGGAACCATGCAGTACCAGACACGAG  
ATAGATCTTCCAAAGAACAGGCTTTTTTTCGAATAAGCCAATTCATTTCGGGACCTGCAG  
ATCCATCTCTTTTCTATTCAAAGATCAGCCCTTTGTCTCTGTGTTTTTCACGCCGAGAAT  
TCTTTGCAGATGAAGAGATGTCAAAGGGCTTATTACTTCCAAACAAATCCTCCTACAT  
CTATATATAAACGCTGGTTCATCAAGAATACGCAAGAAAAGCACTTCGAATTGTTGATTC  
ATCGCCAGAGATGGCTTCGAACCAATAGTTCATTATCTAATGGATCTTTCGGTTCTAATA  
CTCCATCCGAGAGTTATCAGTATTTATCAAATCTGTTCTATCTAACGGAACGCTATTGG  
ATCAAATGACAAAGGCATGTGTTGAGAAAGAGATGGCTTTTCCCGGATGAAATGAAACATT  
TGATTCATGTAACAGGCTAAAACGGACTATGTACTTTTATCTGTTGGGTTACGGGGGGGCA  
TTTTACCAGAGGTTTCTATTGTATCAATTTACCCTTGTGTGATTCCTGTTGAAGCATATA  
CTCGGGGGGTGGGTGACGGGCGGACGATTTCAAACGGACTCCTCATTCATTAGATAGAG  
AAGATCGCCAAGATTTCTGTATCCGCTGCCGAACCTATTCCAATTCCAACAGCCCGGACT  
CGGATCGTGGGGATCGATGGAATACTTCGTATCAACAGATACTTGGTATATGTATATCAA  
TATTGATTAGATCCGAGATCTGTTATTGAATTGCTCATTCATGAGCATTTCAATATTAT  
GCCTTGAAGAGGACTCGAACCTCCACGCTCTTTAGCACGAGATTTGAGTCTCGCGTGTCT  
TACCATTTCACCATCAAGGCATCTTGAAAGTGAATCGTATTCCATGAATGATATCTAT  
CTAGTGTGATATATGGAATATATGACAAAGGTGGAGTTTTGGAGTATTTCTATCGATCGG  
TCATGTATATAGGCCGAGTCGGACATCAAATTGCTTCGATTGAATTATCCGGAGGAT  
ACCTTATATATATCAAAAAGATGTACATCAAACTATTTCTCGATTCAATCGAAGCCCA  
AAGAAGTTAATATGGTACCCAAATAACGATAGATATGTAAAAAGCAGGTCCGATTACGCC  
TATTCCTAATCCTAAATGGAATGTACGACGTAGGGATCCATATGTAAACATAGTCTCTA  
TTTACATATGCTCGAATGACCCCTTCTCATAATGAGAATGTACATAACCCCTATTCCGGTC  
TGGTCCGGTATGGAATGAACCTTATAATCTGATGATCGAGTCGATTCCATGATTATAAGTT  
CATAACCCAGGCCATTCCCATTTTGGGCGGAACAGATCTACTAATCTTTTATTCCAGT  
TAGTAAAGGGATCTTGAACTAAGAAATAGACCCTAGAAGCTAAAAGAGGGTATCCTGAG  
CAATTGCAATAATTTGGATTTCATTGATATTCCTGGTATAGTAGATGCTATCACACATACAA  
TCATACTCAATTTCGATGGAATTGTTTGATCTTAAGGGGGATCTTCTATAATTTTCGCACGT  
GAGGGGTTATTTCTTGGTTTCGTCCAGTCATTAATAACTTGATTATTTTATAGATAATAGT  
AGATAGAAACAACGCTCGTAAGGAGTCCATTGAAACCAAGAAATATAGGCCTGCCTGCC  
ATCCACACCAGAAATAGATGGAGTTTTCCGAAAAAACCTGCTAGTGGAGGAAGACCTCCTA  
GGGATAAGAGACATAGGGCTGAAGAGAGAGCCAAAAAGGATCTTTCGTGTATAATCCTG  
CATAATCTCGAATGTATTACGTTCCGGTACGTAGACCATAATGAGACAATCCGAGCAAAAG  
TTCTAGATTTCATGGAGATATAGAACAGCATATAAGTTATCATGCTTGATATCCATCAT  
TTGAGTCTCCAACAATTATTCGAATAATTACATATCCGATTGACCTATGGACGAATATG  
CAAGCATACGTTTCATGCTTGTGTTGAGTAATAGCAATGAGATTCCTCAATATCATGCTAA  
GAATAGCTAGGATTTCCAGAAGAAGATGCCATTCGTTTGATGAGAAATAAAAGGAATAT  
CGAAAATTCGAGTGGCTGAAGCTGAAGCAGCTACTTTTGAAGTAACAGAAAGAAAAGCAA  
CGACTGGAGTGGGAGAGTCAGAGTCGAAAAGAGGATTCCTCACTTCTTTCTCATTTCAA  
AACCGTGCATGAGACTTTTCATCTCGCACGGCTCCTAAGTGATAAAAGAAAGAAAGAACTCA  
CCTTCTTTCTTTTTTGTATTACCTTCCTCGCGTATGTATAAGACCGAATCCATTTCGATTTC

TAAAAAGGATTACTAATCCTTAACTTTTCGAGGAATCCTTCATCAGTGGTTGTGAATGAC  
TGACTTTTTCAATCTTTTCGACCCCGGTTCCGTAGGAGCACAGTCAGAAAGATTGAGAA  
ATAGAACCATCTGATTGATTCGTTCTCAATAGCCATGAGATGATCATCTTAGGGTGATC  
CTTTTGTGACGGATGCTCCTATTACACTCGTAGTCTCTGAAGGATGAGAACCAACTATG  
TAGCATCTACATCGATAATTCAAGTATTGTATACGTCATTAGTCCGATCCTTTGTAGGAA  
CTACCCGTAATAACGAACTTGCAAAATGGATCTGTTTATCATAAAGAGATTCGTTGTTCC  
TGACCCTGCTTACCTTAATTGTTATTGTAACAAAAAGATCACAATAAACTTTTGGTAAA  
AGTTATGTCTTGGTCCGAGTGGGGATAGCATTTCTCTTCTGTCATGTCCATGGAGTTTGA  
AAAATCCAAACATCTCAGAGATAGATATAGAGGTAGGAATTTGTGCAACGAACCGCACTC  
CTTCGTATACGTCAAGAGTCCATTGATGAGAAGGGGCTGGGGAAAGCTTGAACCCAATTC  
CTACAGTGATGGATATAAGCGCAATGGAAATTCCTGGGGAGTTATACATTTGTGTATTGA  
TAAGACCATTCACTATTTCTTGAAGCTCGATCTCTCCCCGGATGAACCATATAGCCAAG  
AGAAACCATGAACCAGAAATAGAAGAGCTTGCCCCACCCATGAGTAAATATTTTCGTAGTAG  
CCTCATTAGACCGTACATCTCTCTTGGTATATCCAGATAATAGGTAGGAGCATAAACTGA  
AAGATTCTGGAGGTACAAAGATAGTTATTAATCGTTAGCACACATAAAAACATTCCCTC  
CTAGAGTAGCTGTTAATACGAATAACAAAACTCTGTTATAGCCATTTCTGTACATTCAA  
TGTA CTCTACGGATAGAGGAATACATAGAGTTGAACATAGTAAAATAAGAAATGAAAGA  
TTTCGTTGAAATGTTCGTTTGGAAATTTCCGAAAAGCTAATCATAGGTTCTCTCTCC  
ATCGGAACAATAGGGCCGTTATGCTCATTACTAAACTTGTTGAAGAGATGAAATATAACC  
AAGGTATATCTTTTTCGATCAGAGGTTGAATCGATCATCAGAAGAAGAAATTAGGCCAAAAA  
TGAGGATACATTCTGGGAAAATGAAACTTCCATGGAAGAGAAGCAAAATGAAACGCTTTCA  
TAAAAATTCCTGTAAGATCGAGAATGAAGTTTTCATTTCTGTACATGCCAGATCCTGAATT  
AGTAACTGCATCCAATCTCCGAAAAAGTCCCAATTGTTTCGAACTTTTCGATTTTGGGAAT  
GGGATATTTACGGAATCCCCATGAACAGGATCAAACCTTATCCATGGTATTTCCATGAG  
ATTCTCTCTTCTTATTCTTAAGAAAGCCCCGAGAGGGCTTAGTTGATCCATGATTTATG  
TTTCATCTTTCTTTCTTCTTTTTCGTTTGTTCGAGAAAGATATCGATCCATTCCAATTCTT  
TCTTTTCTATTGATTCTTTTCCGATCGAGATGTATGGATCCACGGATCTATGTGTCTAT  
ATAGATCCTGTTTCATGGATTAACGAAAAATGTGCAAAAGCTCTATTTGCCTCTGCCATTCT  
ATGAGTCTCTTCTTTTTCGCTATGGCATCGCCACTCCCTTTGGCAGCATCCACTAATTC  
GGAACCTAATTTGAAAGCCATATTTTCGACCCGACGTTTTCGGGATGCCCTAATAACCA  
ACGAATGGCAAGTCGCTTTTCCTTGTGTAGATTCTATTTCAATAGGAACCTTGATGAGTCGA  
TCCACCTACACGTCCTTGCTTTGACTGCTATATCGGGAGTTACTCCACGTATTGCTTGACG  
TAAACAGATAGTGGATTGTTTCTGTCTTTTGTGTAATCTTTTTCACGGCTTGATAGAT  
AATTTGATAAGCCAATGATTTTTTTCGTTGTTTCAGAAATACGGTTAACCAACATGTTAAC  
TAATCGATTACGATAAATGGATCGGATTTTGCAGTTTTTCTTCTGCAGTACCTCGACG  
TGACATGAGCGTGAAAGAGGTTCAAGAAATCCGTTTTCTTTTATACGGGCTAAAAACGAA  
TCACTTATTTTGGCTTTTTCGACCCATATTGTAGGGTGGATCTCGAAAGATATGAAAGAT  
CTCCCTCCAAGCCGTACATACGACTTTTCATCGAATACGGCTTTCCACAGAATTTGATATG  
TATCTATGAAATCGAGTATGGAATTCTGTTTACTCACTTTAAATTGAGTAGCCGTTTCCC  
TCCTTTTCCTGCTAGGATTGGAATCCTGTATTTTACATATCCATACGATCGAGTCCCTG  
GGTTTCCGAAATAGTGTAAAAAGAAGTGCTTCGAATCATTGCTATTTGACTCGGACCTGT  
TCTGAAAAAGTCGAGGTATTTCCGAATTGTTTGTGACACGGACAAAGTAAGGGAAAACTT  
CTGAAATGATTTCATATTTGAACCTTGGACATATAATAGTTCCGAATCGAATCTCTTAG  
AAAGAAGATCTTTTGTCTCATGGTAGCCTGCTCCAGTCCCCTTACGAACTTTTCGTGATT  
GGGTTAGCCATACACTTCACATGTTTCTAGCGATTACATGGCATCATCCAATGATACAA  
GTCTTGGATAAGAATCTACAACGCACTAGAACGCCCTTGTGACGATCCTTTACTCCGAC  
AGCATCTAAGGTTCCTCGAACAATGTGATATCTCACACCGGGTAAATCCTTAACCTTCC  
TCCTCTTACTAAGACTACAGAATGTTCTTGTGAATTATGGCCAATACCAGGTATATAAGC  
AGTGATTTCAAATCCAGAGGTTAATCGTACTCTGGCACTTTACGTAAGGCAGAGTTTGG  
TTTTTTGGGGGTGATAGTGGAAGGTTGACAGATAAGTCACCCCTTACTGTCACTCTACAG  
AACCGTACATGAGATTTTCACCTCATACGGCTCCTCGTTCAATTCTTTTCGAAGTAATTGG  
GTCCTTTTCTCGTTCGAGAATCTCCTCCCTTCTTCCACTCCGTCCCGAAGAGTAACCTAG  
GACCAATTCAAGTCACGTCTCATGTTTCCAATTGAACACTTTCCATTTTGTATATGATCA  
AAGGAGAAGATTATCTTTTACCAAAATATGCGGATCAAATCACGATCTTATAATAAGA  
ACAAGAGATCTTTCTCGATCAATCCCTTTGCCCTCATTTCTCGAGAATCAGAAAGATCCT  
TTTTGAGTTTGAATTTGTTCAATTGGAATCTTTATTTATTTTTGTATTTTTTATTTATTT  
ATTTTCTTTGATTCTTTATTTTCGATTTTCTTTCCCTCTCTTTTCTTTTATTTCCCTTCCA  
TCATTCCTTAAGTTCCTAGGTTTGATCCTGTAGAATCTGACCCATTTTCTCATCGAACG  
AGGGGTACGAAATAAATCCGATTGATTTTTCGATCAAAAGTACTATGTGAAATCTTCGGT  
TTTTTCTCTTCTCTATCCCATAGGTACAGCGTTTGAATCAATAGAGAACCTTTTCTTC  
TGATGAAATCGATATTATTACATTCCAATTCTTCCCGATACCTCCCAAGGAAAATCCCG  
AATTGGATCCCAAATGACGGGTTGGTGAAGCTTATCCATGCGGTTATGCACTCTTCGA  
ATAGGAATCCATTTCTGAAAGATCTGGCTTTCGTGCTTTGGCGGGTCGTCGAGATCC  
TTTCGATGACCTTATGTTGTGTTGAAGGATATCTATATGATCCGATCGATTGCGTAAGGC  
CCGCGGTAGCAACGGAGCCGGGAAAGTATACAGAAAAGACAGTTCTTTTCTATTATATTA  
GTATTAGTTAGTGATCCCGGCTCGGTGAGTCTTCTTCCGTGATGAACTGTTGGCACCA

GTCTTACATTTTGTCTCTGTGGACCGAGGAGAAAGGGGGGCTCAGCGGGAAGAGGATTGT  
ACCATGAGAGAAGCAAGGAGGTCAACCTGTTTCAAATATACAAATGGATTCTGGCAATGC  
AATGTAGTTGGACCCATGTCGATCCGAATGAATCAGTCTTCCACGGAGGTCAATCTT  
TGCTGCTAGGCAAGAGGATAGCAAGTTACAAATTCTGTCTCGGTAGGACATGTATTCT  
ATTACTATTAAATTCAGAAATGAAGTAGTTAATGTTGGGGTTACCATTATCCTTTTGTGTA  
GTGACGAATCTTGATGTGTTCCCTAAGAAAAGGAATTTGTCCCTTTTTCGAG  
GTCTCAAAGGGCGTGGAACACATAAGAACTCTTGAATGGAATTTGAAAAGAGATGTAG  
CTCCAGTTCCTTCGGAATGGTAAGATCTTGGCGCAAGAAGAAGGGGTGATCCGTATC  
ATCTTGACTTGCTTCTGCTTCCCTCTCTTTTTTAACAATACCGAGTCGGGTCTCTCTCCT  
ACCAGTATCGAATAGAACATGCTGAACAAAATCTTCTTCTGTAAAACCTGCTCGATTTA  
GATCGGGAATCGTACGGATTTTATGAAACCATGTGCTATGGCTCGAATCCGTAGTCAA  
TCCTATTTCCGATAGGAGCAGTTGACAAATTGAATCCAATTTTCCATTCTTTTCGTATCC  
GTAATAGTGCGAAGAAGTCCCGGCTCCGAGTTGTTTCAGGAAGAGTGGCGTTGAGTTTC  
TCGACCTTTGCCTTAGGATTAGTCAGTTCTATTCTCGATGGGGGCAGGGAAGGGATAT  
AATCAGCGGTAGGATGTCACCTTGACGTGGTGGAAAGTCATCAGTTTCGAGCCTGATTATC  
CCTAAACCAACGCAATGTGAGTTTTTCTATTTTGAATGCTCCCCCGCGGTGATCGAAT  
GAGAATGGATAAGAGGCTCGTGGGATTGACGTGAGAGGGTAGGGATGGCTATATTGCTGG  
GAGCGAATCCAGGCTAATATGAAGCGCATGGATACAGCCTTGGAAATGAAAGACAATTC  
CGAATCAGCTTTGTCTACGAACCGGAAGATTGGTAAGTAATGCAACTATGAATCTCATGG  
AGAGTTTCGATCCCGGCTCAGGATGAACGCTGGCGGCATGCCTAACACATGCAAGTCGGAC  
GGGAAGTGGTGTTCAGTGGCGGACGGGTGAGTAACGCGTAAGAACCTGCCCTTGGGAG  
GGGAACAACAACCTGGAACCGGCTGCTAATACCCCGTAGGCTGAGGAGCAAAGGAGGAAT  
CTGCCCGAGGAGGGGCTTGCCTGCTGATTAGCTAGTTGGTGGAGCAATAGCTTACCAAGGC  
GATGATCAGTAGCTGGTCCGAGAGGATGATCAGCCACACTGGGACTGAGACACGGCCAG  
ACTCCTACGGGAGGCAGCAGTGGGGAATTTCCGCAATGGGCGAAAGCCTGACGGAGCAA  
TGCCCGGTGGAGGTAGAGGCCACCGGTCGTGAACCTCTTTTCCCGGAGAAGAAGCAAT  
GACGGTATCTGAGGAATAAGCATCGGCTAACTCTGTGCCAGCAGCCGCGGTAAAGACAGAG  
GATGCAAGCGTTATCTGGAATGATTGGGCGTAAGGCGTCTGTAGGTGGCTTTTCAAGTCC  
GCCGTCCAATCCAGGGCTCAACCCCTGGACAGGCGGTGGAACCTACCAAGCTGGAGTACG  
GTAGGGGCAGAGGGAATTTCCGGTGGAGCGGTGAAATGCGTAGAGATCGGAAAGAACACC  
AAGCGCGAAGACCCCTGCTGGGCCGACACTGACACTGAGAGACGAAAGCTAGGGGAGCG  
AATGGGATTAGATACCCAGTAGTCCTAGCCGTAAACGATGGATACTAGGCGCTGTGCGT  
ATCGACCCGTGCACTGCTGTAGCTAACGCGTTAAGTATCCCGCCTGGGAGTACGTTTCGC  
AAGAATGAAACTCAAAGGAATTGACGGGGGCCGCAAGCGGTGGAGCATGTGGTTTAA  
TTCGATGCAAAGCGAAGAACCTTACCAGGGCTTGACATGCCGTGAATCCTCTTGAAGAG  
AGGGGTGCCTTCGGGAACGCGGACACAGGTGGTGCATGGCTGTCGTGAGCTCGTGCCGTA  
AGGTGTTGGGTTAAGTCCCGCAACGAGCGCAACCCCTCGTGTTTAGTTGCCACCATGAGT  
TTGGAACCCCTGAACAGACCGCCGGTGATAAGCCGGAGGAAGGTGAGGATGACGTCAAGTC  
ATCATGCCCCCTATGCCCTGGGCGACACACGTGTACAAATGGCCGGGACAAAGGGTCGCG  
ATCCCCGCCAGGGTGAGCTAACTCCAAAAACCCGTCTAAGTTCGGATTGACAGGCTGCAAC  
TCGCCCTGCATGAAGCCGAATCGCTAGTAATCGCCGGTCAGCCATACGGCGGTGAATTCG  
TTCCCGGCGCTTGTACACACCGCCCGTCACACTGTGGGAGCTGGCTATGCCCGGATCGT  
TACCTTAACCGCAAGGAGGGGGATGCCGAAGGCGGGGCTAGTGAAGTGAAGTCGTA  
ACAAGGTAGCCGTACTGGAAGGTGCGGCTGGATCACCTCCTTTTCAGGGAGAGCTAAAGA  
AGCGAGCTACGCTGAGCTAAGCTTGGAGATGGAAGTCTTCTTTCGTTTCTCGACGGTGA  
AGTAAGACAAGCTCATGAGCTTATTATCCTAGGTGCGGAACAAGTTGATAGGATCCCCTTT  
TTTACGTCCCCATGCCCTCCCGTGTGGCGACATGGGGCGCAAAAAGGAAGAGAGGGA  
TGGGCTTTCTCTCGCTTTTGGCATAGCGGGCCTCCCCGTGGGGGGCCGCAAGGGCTATT  
AGCTCAGTGGTAGAGCGGCCCTGATAATTGCGTCTGTGCTGGGCTGTGAGGGCTC  
TCAGCCACATGGATAGTCAATGTGCTCATCAGCGCCTGACCCGGGGATGTGGATCATCC  
AAGGCACATTAGCATGGCGTACTCCTCCTGTTTGAACCGGAGTTTGAACCAAACCTCTC  
CTCAGGAGGATAGATGGGGCGATTCAAGTGAGATCCAATGTAGATCCAACCTTCTATTCA  
CTCGTGGGATCCGGGCGGTCCGGGGGGGACCAACATGGCTCCTCTCTCTCGAGAATCCA  
TACATCCCTTATCAGTGTATGGACAGCTATCTCTGAGCACAGGTTTAGGTTTCGGCCTCA  
ATGGGAAAATGGAGCACCTAACACGCATCTTACAGACCAAGAACTACGAGATCACCCC  
TTTCATTTCTGGGGTGACGGAGGATCGTACCATTTCGAGCCTTTTTTTTTTCATGCTTTTCC  
CGCGGAGGTCTGGAGAAGCAGCAATCAATAGGATTTCCCTAATCTCCCTTCCCGAAAG  
GAAGAAGGTGAATTTCTTTTCTTTTCCGACGGGACCAAGGAGATTGGATCTAGCCATAAG  
AAGAATGCTTGGTATAAATAACTCACTTCTTGGTCTTCGACCCCTCAGTCACTACGAAC  
GCCCCCGATCAGTGAATGGGATGTGTCTATTTATCTATCTTGAATCAAAATGGGAG  
CAGGTTTGAAAAGGATCTTAGAGTGTCTAGGGTTGGGCCAGGAGGTTCTCTTAACGCCT  
TCTTTTCTTCTCATCGAGTTATTTTCAAAATACTTGCCATGGTAAGGAAGAAGGTGGG  
AACAAGCACACTTGGAGAGCGCAGTACAACGGAGAGTTGTATGCTGCGTTTCGGGAAGGAT  
GAATCGCCCCCGAAAAAGAATCTATTGATTCTCTCCCAATTGGTTGGATCGTAGGTGCGA  
TGATTTACTTACGGGCGAGGTCTCTGGTTCAAGTCCAGGATGGCCAGCTGCGCCAGGG  
AAAAGAATCGAAGAAGCATCTGACTCCTTCATGCATGCTCCACTGGGCTCGGGGGGATAT

AGCTCAGTTGGTAGAGCTCCGCTCTTGCAATTGGGTCGTTGCGATTACGGGTGGATGTC  
TAATTGTCCAGGCGGTAATGATAGTATCTTGTACCTGAACCGTGGCTCACTTTTTCTAA  
GTAATGGGGAAGAGGACCGAAACATGCCACTGAAAGACTCTACTGAGACAAAGATGGGCT  
GTCAAGAACGTAGAGGAGGTAGGATGGGCAGTTGGTCAGATCTAGTATGGATCGTACATG  
GACGATAGTTGGAGTCGGCGGCTCTCCTAGGGTTCCCTCATCTGGATCCCTGGGGAAGAG  
GATCAAGTTGGCCCTTGCGAACAGCTTGATGCACTATCTCCCTTCAACCTTTGAGCGAA  
ATGTGGCAAAAGGAAGGAAAATCCATGGACCGACCCCATCGTCTCCACCCCGTAGGAACT  
ACGAGATCACCCCAAGGACGCCCTTCGGCATCCAGGGGTCACAGACCGACCATAGACCTG  
TTCAATAAGTGGAACGCATTAGCTGTCCGCTCTCCGGTTGGGCAGTAAGGGTCGGAGAAG  
GGCAATCACTCATTTCTTAAAACAGCATTTCTTAAGACCAAAGAGTCGGGCGGAAAAAGGG  
GAAGAGCTCCCGTTCTCGTTCTCGTGTAGCTGGATCCTCCGGAACCACAAGAATCCTT  
AGAATGGGATTCCAACCTCAGCACCTTTGAGATTTTGAGAAGAGTTGCTCTTTGGAGAGC  
ACAGTACGATGAAAGTTGTAAGCTGTGTTCGGGGGGGAGTTATGTCTATCGTTGGCCTC  
TATGATAGAATCAGTCGGGGAGGCCCGAGAGGCGGTGGTTTACCCTGTGGCGGATGTCAG  
CGGTTTCGAGTCCGCTTATCTCCAGCTCGTGACCTTAGCCGATGCAAAGGTATATGATAGC  
ACCCAATTTTTCCGATTTCGGCAGTTCGATCTATGATTTCTCATTCATGGACGTTGATAAG  
ATCCTTCCATTTAGCAGCACCTTAGGATGGCATAGCCAACACATTAATGGCGAGGTTCAA  
ACGAGGAAAGGCTTACGTTGGATACCTAGGCACCCAGAGAGGAGGAAGGGCGTAGTAGC  
GACGAAATGCTTCGGGAAGTTGAAAATAAGCATAGATCCGGAGATTCCCGAATAGGTCAA  
CCTTTCGAACTCGTGTCTGAATCCATGGGCAGGCAAGAGACAACCTGGCGAACTGAAACAT  
CTTAGTAGCCAGAGGAAAGAAAGCAAAAGCGATTTCCGTAGTAGCGCGAGCGAAATGG  
GAGCAGCTAAACCGTGAAAACGAGGTTGTGGGAGAGCAATACAAGCGTCGTGCTGCTAG  
GCCAAGCGGTGGAGTGTGTCACCTAGATGGATAGAGTCCAGTAGCCGAAAGCATCACTA  
GCTTACGCTCTGACCCGAGTAGCATGGGGCACGTGGAATCCCGTGTGAATCAGCAAGGAC  
CCCCTTGCAAGGCTAAATACTCTGGGTGACCGATAGCGAAGTAGTACCGTGAGGGAAG  
GTGAAAAGAACCCCATCGGGGAGTGAAATAGAACATGAAACCGTGAGCTCCCAAGCAGT  
GGGAGGAGAAATCTCTGACCGCGTGCCGTGTTGAAGAATGAGCCGGCGACTCTTAGGCAGT  
GGCTTGGTTAAGGGAACCCACCGGAGCCGTAGCGAAAGCGCGTCTTCATAGGGTAATTGT  
CACTGCTTATGGACCCGAACCTGGGTGATCTATCCATGACCAGGATGAAGCTTGGGTGAA  
ACTAAGTGGAGGTCCGAACCGACTGATGTTGAAGAATCAGCGGATGAGTTGTGGTTAGGG  
GTGAAATGCCACTCGAACCCAGAGCTAGCTGGTTCTCCCGAAATGCGTTGAGGCGCAGC  
AGTTGACTGGACATCTAGGGGTAAAGCGCTGTTTCGGTGCGGGCCGCGAGAGCGGTACCA  
AATCGAGGCAACTCTGAATACTAGATATGACCCAAAATAACAGGGGTCAAGTTCGGAC  
AGTGAGACGATGGGGGATAAGCTTCATCGTCGAGAGGGAACAGCCCGGATCACCAGCTA  
AGGCCCTAAATGACCGCTCAGTAATAAAGGAGGTAGGGGTGCAGAGACAGCCAGGAGGT  
TTGCCTAGAAGCAGCCACCCTTGAAAGAGTGCCTAATAGCTCACTGATCGAGTGCTCTTG  
CGCCGAAGATGAACGGGGCTAAGCGATCTGCCGAAGCTGTGGGATGTAAAAATGCATCGG  
TAGGGGAGCGTTCCGCTTAGAGGGAAGCTCCCGCGCAGCAGGTGTGGACGAAGCGGAAG  
CGAGAATGTCGGCTTGAGTAACGCAACATTGGTGAGAAATCCAAATGCCCGAAAACCTAA  
GGGTTCTCCGCAAGGTTCTGTCACGGAGGGTGAGTCAGGGCCTAAGATCAGGCCGAAAG  
GCGTAGTCGATGGACAACAGGTGAATATCTCTGTAACCCCTTGTGGTCCCGAGGTAC  
GGAGGAGGCTAGGTTAGCCGAAGATGGTTATCGGTTCAAGGACGCAAGGTCACTTGGT  
TTTTTAGGGCAGGGTAAGAAGGGGTAGAGGAAATGCCCGAGCCAATGTCCGAGTACCAG  
GCGCTACGGCGCTGAAGTAACTCATGCCATACTCCAGGAAAAGCTCGAAGGACCTTCAA  
CAAAAGGGTACCTGTACCCGAACCGACACAGGTGGGTAGGTAGAGAAATACCTAGGGGCA  
CGAGACAACCTCTCTAAGGAACTCGGCAAAATAGCCCCGTAACCTCGGGAGAAGGGGTG  
CCTCCTCAAAAGGAGGTGCGAGTGACCAAGGCCCGGGCGACTGTTTACCAAAAACACAGG  
TCTCCGCAAAAGTCGTAAGACCATGTATGGGGGCTGACGCTGCCAGTGCCGGAAGGTTA  
AGGAAGTTGGTGACCTGATGACAGGGGAGCCGGCGACCGAAGCCCCGTGAACGGCGGCC  
GTAACATAACGGTCCTAAGGTAGCGAAATTCCTTGTGGGTAAAGTTCGACCCGCACGA  
AAGGCGTAACGATCTGGGCACGTCTCGGAGAGAGGCTCGGTGAAATAGACATGTCTGTG  
AAGATGCGGACTACCTGCACCTGGACAGAAAGACCTTATGAAGCTTTACTGTTCCCTGGG  
ATTGGCTTTGGGCTTTCTGCGCAGCTTAGGTGGAGGGCGAAGAAGGCCTCCTTCCGGG  
GGGGCCCCGAGCCATCAGTGAGATACCACTCTGGAAGAGCTAGAATTCTAACCTTGTGTCA  
GGACCTACGGGCCAAGGGACAGTCTCAGGTAGACAGTTTCTATGGGGCGTAGGCCTCCCA  
AAAGGTAACGAGGCGTCGAAAAGTTTCTCGGGCCGACGGAGATTGGCCCTCGAGTGC  
AAAGGCAGAAGGAGCTTGACTGCAAGACCCGCCCGTCGAGCAGGGACGAAAGTCGGCCT  
TAGTGATCCGACGGTGTGAGTGGAAAGGGCCGTCGCTCAACGAGATAAAAGTTACTCTAGG  
GATAACAGGCTGATCTCCCCAAGAGTTCACATCGACGGGAAGGTTTGGCACCTCGATGT  
CGGCTCTTCGCCACCTGGGGCTGTAGTATGTTCCAAGGTTGGGCTGTTCGCCATTAAA  
GCGGTACGTGAGTGGGTTGAGAACGTCGTGAGACAGTTTCGTCCATATCCGGTGTGGGC  
GTTAGGGCATTGAGAGGACCTTTCCTAGTACGAGAGGACCGGGAAGGACGCACCTCTGG  
GTACCAAGTTATCGTCCACGGTAAACGCTGGGTAGCCAAGTGCGGAGCGGATAACTGC  
TGAAAGCATCTAAGTAGTAAGGCCACCCCAAGATGAGTGCTCTCTATTCGACTTCCCC  
AGAGCCTCCGGTAGCACAGCCGAGACAGCGACGGGTTCTCTGCCCTCGGGGATGGAGC  
GACAGAAGTCTTGAGAATCCAAGATAAGGTCACGGCGAGACGACCGTTTATCATTACGA

TAGGTGTCAAGCGGAAGTGCAGTGATGTATGCAGCTGAGGCATCCTAACAGACCGAGAGA  
TTTGAACCTTGTTCTACATGACCCGATCAATTCGATCAGGCACTCGCCATCTATTTTCA  
TTGTTCAACTGTTTGACAACATGAAAAAACAAAAGCTCTGCCCTCCCTCTCTATCTATC  
CAAGGGATGGAAGGGCAGAGGCCTTTGGTGTCCCTTCCAGTCAAGAAATTTGGGCTTCACA  
ATCACTAGCCAATATTCTCTCATACCTTTCTTCGTTTCATGGTTCGATATTCTGGTGTCC  
TAGGCGTAGAGGAACACACCAATCCATCCCGAACTTGGTGGTTAAACTCTACTGCGGT  
GACGATACTGTAGGGGAGGTCTGCGGAAAAATAGCTCGACGCCAGGATGATAAAAAGCT  
TAACACCTCTTATTCTTATTACTCAAAAAGAAAAAATGAAAAGGTCGTCTTATTCAAAA  
CCCAATTATGACATCCCTTCTCTCCACTTCACACCTCGGAACGCGCTGTTCTTATAGAG  
AGAAAGGCGCTTTCACGTCTTCTTAACCCGAAATGGCTGAGGGGAGAAAAGGTTCTTTT  
TGAGGGTACTCCAGGGAACAGATCCAGTGGAGACGGGGTGGGGCTGTAGCTCAGAGGAT  
TAGAGCAGTGGGTACGAAACACGGTGTGCGGGGTTCGAATCCCTCCTCGCCACAACCG  
GCCCAAAAGGGAAGGACCTTTCTTTACCTCTGGGGGTAGGAAAAATCATGATCGGGATAG  
CGGACGCAAGCTATGGAAGTGGGGTGTGGGTCTTTTGTGAAATGGCCTTATCTTTTT  
ATTTATCGTGAAGGAAAAATCGATACATATAGTATGCCTGGCCGAAATCAGCATATTG  
TGTTTTACTCCCCGTAACCTCTTCCAGCCAGGCTTGGGAAGAATAGCAGAGCAAATACA  
AGTATTAGTAGCATAGCAAAAATGCGTTCCTCGTCATTAATATGTTTGCTCGCGGTAATT  
GTGGCCTCTCGGAGAAATCGATGACTGCATCTTTGATGCATGCTAGTACATCATCTGAG  
AATTATGAATTGGCTAGTTGTAAATAGCCCCAGGGCTATGGAACAAAGGATTATCCCGGA  
TCTACACCGAGGTATTGACGGTGATTCTCAAATATCGCAGAACAGAATGCGATGAGATAG  
AGTGCAATAGAAACAAAGACAGGGAACGGGTACCTACTCCTAACGGTCAAAGCGAGCCC  
TTTAATTCTGTAATTCTGAATCTTTAATTAAGAATTCATCAAATCTCCCCAAGTAGGAT  
TCGAACCTACGACCAGTCAGTTAACAGCCAACCGCTCTACCACTGAGCTACTGAGGAATA  
ACGGGAGATTTCGATCTCATAGAGTTCAACTCCCGCTCTCAACCCATGACCAATATGAGCC  
CGAAGCTTCTTCGTAACCTCCGGAACCTTCTCGTAGTGGCTCCGTTCCATGCCTCATTT  
CATAGGGAACCTCAAAGTGGCTCTATTTCAATTATATTCCATCCATATCCCAATATTCCAT  
CCATATCCCAATTCCATTCATTTAATATCCCTTTGGTGTTCATTGACATAAGAGATGTCAT  
TCAATCGAAGAAGAGGGTATCATTGACATAAAAGATGTCATTTCTAGTCTATCTGTTTCT  
ATCTATGGAAAGTGAAGAAATCATCATATAGTAATCGAGAAATGCAATAGAAAAGAAAA  
AAGGGAGGTTTGTGATGATTTTGAAATCTTTTCTACTAGGTAATCTATTATCCTTATGCA  
TGAAGATAATAAATTTCGTCGTTGTGGTTCGACTCTATTATGGATTTCTGACCACATCT  
CCATAGGGCCCTCTTATCTTTTCTCTCCGAGCTAGGATTATGGAAGAAGGAACCGAGA  
AGGAGGTATCAGCAACAACCTGGTTTTATTACGGGACAGCTCATGATGTTCATATCGATCT  
ATTATGCGCCTCTGCATCTAGCATTGGGTAGACCTCATACAATAACTGTCCTAGTTCTAC  
CGTATCTTTTGTTTCATTTCTTCTGGAACAATCACAAACACTTTTGGATTATGGATCTA  
CTACCAGAAATTCATGCGTAATCTCAGCATTCAATGTGATTCTCTGAATAATCTCATTT  
TTCAATTATTCACCAATTTCAATTTTACCAAGTTCAACGTTAGTCAGATTAGTCAACATTT  
ATATGTTTCGATGCAACAACAAGATGTTATTTGTAACAAGTAGTTTTGTTGGTTGGTTAA  
TTGGTCACATTTTCTTCATGAAATGGGTGGATTGGTATTATCTGGATACGGCAAAATC  
ATTCTATTAGATCGAATGTACTTATTTCGATCTAATAAGTACCTTGTGTGCAATTGAGAA  
ATTCTATGGCTCGAATCTTACTATTCTCTTATTATCACCTGTGTCTACTATTTAGGCA  
GAATACCGTCCGCTATTGTCTACTAAGAAACTGAAAGAAACCTCAAAACCGAAGAAAGGG  
GGGAAAGTGAGGAAGAAACAGATGTAGAAATAGAAAAAACTCCGAACGAAGGGGACTA  
AACAGGAACAAGAGGGATCCACCGAAGAAGACCCTTCCCTTTGTTTCGGAAGAAGGGAGG  
ATCCAAAAAACTACATGAAAAAAAAGAGGGCAAGAAATTTGAAAGTTAGAAATACCTTA  
AAGAGAAAGAAGATAAAGACCTCTTCTGGTTTGAAAAACCTCTGTGAATCTTCTTTTCG  
ACTATAAACGATGTAATCGTCCATTGAGATATATAAAAAAAATTTATTTCAAAATGCTG  
TAAGAAATGAAATGTACAAATATTTTTTTCACGTATGTCCAGTTGATGGAACAAATAA  
TATCTTTTACATATCCACCCAGTTTATCGATTTTTTTGGAAATGATGCAAAGAAAGATGT  
CTTTGTGTACGACCGAAAAACTATCCCCGAAGATCTGTATAATCATGGGTTTATACCA  
ATGAACAAAAAGGTACAGCTTGAGCAATGAATTCATAAACCGAATAGAAGTTCTAAACA  
AGGGATCTCTTACTATTGGATGTGCTTGAAAAAAGGACCAGATTGTATAATGATAAAAAATA  
ACCAAGTCTAGTCACTTCTTATCTATTTCAAAACAAAAAGAATAGATAATAGATATAGTA  
AATTAATAAAAAAGCCGGATACATATGATAAATATACAAAGAGATAAGAAGAGATTCGCCC  
TCCCCCACAATTTGATCCCTTCTCTACAAAGAACTTGCAACACCAACACCATTGGT  
AATTCCGTCGAATTACCCGTCTATCTAAAAAATGAGTTACTTCAGCTAATCCTCTTATACT  
TGAGTTAAGCATGTTGCATAAAAAAGATCTATGTAACCACGATTATATGACCAATTGTA  
TATCACATTTATTTATTCGGTCCCAATAAAATTTTCTTAGAGCCTGTTTTTTTAAACAAATGA  
ATTGATTAAAGTCCAAATCTGAAAAGATGAATTAACAGACCCATATAAAATAGACGCTAT  
GAATATTCCAAAACAGGCTATACTGACTGAATAAATTGCATTTGTACAAATTCATACCA  
ATCCACAGAATAGTTCGAATTTTGATGTAAAAGGTTTATTGATGGAGTTAACCATTTTGA  
TAATATATCAAAATCGATTACTCCTTGATCGAAAGGAATTCCTATGGATCCACGAACAA  
AGTAAATAGGACCAATATAAGTAGAGGCAAAAGCATAGTATTGTCTGATTTCATGGGGATA  
CGTTGAAGTGTCTTTATTTTCAAAATAAATCCTACAGGAGCGTATCAGATTTCTTACATT  
TCCGTTCAATTTGTATATCTTCTCGAAAAAAGGAAACCTTTTCATTATTATTCATTGT  
TGATAAAACAAATTTCTGTTAACTGGTTTGGTTCCTTCTTTCCCCCATATAGATATTGA

ATAGAACGAGCTATTTTGTAGTGCCACTGTAATTTTGAAAAATGAGCATGTAAATGACCATC  
AAAAGTAAGTAAATACATCCGAAACATATAAAATGCAGTTAACCCCGCCGAGAAACAGC  
TATTATCGCGAAAAATAGGTGAATACAACCAACTATCATTAAGAATTTTCATCTTTAGACCA  
AAAACAAGCAAGAGGTGGAATTCACAAAGAGAAAGTGTACCTAATAAAAAAGTATTTT  
TGTAATTGGCACATATTTTGTAAACCACCCATAAGAACCATGTTCTGACTTTTATCTGG  
AGAATATCCAACAATGGGTTCCATTGAATGAATAATTGATCCGGATCTAAAAACAATAA  
TGCTTTCCGAATAGGCATGAGTGATCAATGGAATAAAGCAGCTCGATAAGAGCCTATCCC  
TGGGGCTAACATAATATAACCCAATTGAGACATTGTAGAATAGGCTAAACTTCTCTTAAT  
GTCTCTTTGAGCAAGAGCTAAAGTAGCTCCTAATAGTACCGTTATTACACCTATCAAAGA  
AATGAGATTCATTATGTAAGGTATGACTGTGAAAAGCGGAAGAAATCGAGCGACAAGAAA  
AATGCCTGCTGCTACCATAGTAGCAGCATGGATAAGAGCTGAAATAGGAGTAGGCCCTC  
CATGGCATCAGGTAACCATACATGAAGGGGAAATTGTGCGGATTTAGCAACTGCACCGAC  
GAATAATAGGGAGGCACACAGAGTAGCAATAAAGAGTTGACCCCATTTATTACGGATCAG  
GTTATTGAAGATTTGGAACAAATCTCGAAATTCGAACTCCCTGTTATCCAATAAAAAACC  
TAAGATTCTTAATAAACC AAAATCCCTACACGATTAGTTACAACGCTTTTGTACA  
AGCATTTCGCGCAGCCGGTCTGTGAACCAAAAACCTATTAATAAATACGAACACATTCC  
CACTAGTTCCCAAAAAATATGAATTTGTATCAAATTGGAAGTAGTAACATATCCCAACAT  
GGAAGTATTGGA AAAACTCATATAAGCAAAAATCTCAAATATCCTTGATCATGAGACAT  
ATAATTGTCACTATAAATAAGAACCATGATTCCAACCGTAGTGATTAGTATTGACATAAT  
AGAAGTAAGTGGATCGATCAAGTAGCCGAACCTAAGGAAAAATCAGTATTGATGGTCCA  
AGACCATAGATGTTGATAGATAGAAGTCCCATTTATCTGTTGAATAGACAGATCGGACGA  
AAAAACCATAACTATACTTAGCAATGAAACACTAGGAAAAGTCCACATACGACGCAGATT  
TTTGTTCGCGGTGGAACAAGCAGAAAGTCCCAACCCATTGACATAGTAACCTGGAAGTAG  
AGCGAAAGGTATGATCCATGCATATTGATATGTATGTTCCATAAGAAAATCAAACCTTCT  
TTTTTTATCTTTATTAATTGTTTCCCATTCACCAGCCCTTATTTCTTCGGAAGGAGCAA  
TAATCAATAAATAAAAAAAAATCAAGATATACAAGATATAAAAGAACTCAAATATGAT  
TTTTCATCTCTAATTATCTGATTCTTTCCAACTATTGAAAAAAAAAAAAAAAAAAAAA  
ATTCAAATAATCAAGTTACTAGTTAAAAGCTACTACCTAGTTATTAACGAAGATATTTAT  
TAAGATAAAAAATACGAGATTTTCAATTATTCTACTATATACATACGATACGGTAATTC  
TATCCATATTTATATCAATATAGTAAGGAAAAAGAATGATACCCAAATTTCAAGTACTTT  
ATCTGATATGATCGATCGATAGGATCTGCCAATAACTCGATCCAATAAACCTAGTTTTTTTT  
AGTTTCTTCGGAGTCATTAACATAAAACAAATCTGGAATTGATTGGCTTCTAGTCCAATA  
AAACAACTTATGTTTATGTGTTTATGAAAAATGCTAGAATACTTGTCACTTCGCATAGA  
ACTAAAAAGAGAAATTACTCAAATCCCTTTATTTTATCAAGTAATGTATTGTTTAACGG  
ATTAACACTCTTTAGATTAAATTTCAATTTAAATTTATGTGGACTCTATCTCCGAGCTTGAT  
CAATTAATAGAAAAAGGTTACATTCAATTATTGGTTTCCTAAATTAGGAAAGGGTCTTAA  
GCTTTTCGATTTATTA AAAATTAACATTTATAATATATATATATATTATCTAAATAGACTG  
AGATATGAATTGGAACCTTTTAAATTCTTATCAATGGCATCCGATTCAACGGTAGTAGAT  
CCGCGCCGTAGACATAGATTGAATAAAGATATGAAGCCCCAATCAGTACAAATTATTCT  
TTCTTCGAACATTGGATGTAATGGAAATGTGAAAAAAAAAAAAAATTCCTTGAAAAATCA  
CATCGTTTTTCTTTTTCTTCTATTTTCATTTCTTTTTTATCCTTAATGATACCATATG  
CGATGCTGATCTATCTGTATCCATACTCTTCTATGTTATGAAGTAAGCATAAGTATCGCG  
TATGGAATAAAGATAGATAATGAATAGTTAATAGAAAGAACATCTATTTTGAATTGAAT  
AATAAATGTCTTTCACGTCCAACATAAAAAATGAGTGACCCTTTTATTTTGAAATGGCGG  
TTCCAAAGAAACGTACTTCTCTGTCAAAAAAGCATATTCGTAGAAATATTTGGAAAGGAA  
GGGGATATCAGGCCGCGGCAAAAGCTTTATCTTTAGCTAAATCTATTTCTACCGGGCATT  
CAAAAAGTTTTTTTGTGCGACAAACAAGTAATAAAGCCTTGGAATGATCTGAATCTGCAT  
CAGCATGACTCGATGAATTGGATGATTAAATTTATAAGATGAAGAAATCACATTAACATA  
TGTTTTGAACTCATCAATATGAGATAGAACTAGCTGTTGTGGTATGTAGAATATGAAGTA  
TTCTGTATACTAGGTTCTAAAAATGATTCTTTTTTTTGTGAAAAAAAAAAAAAAGAAA  
GAAAAAGAAGTAGTTAGACACAAAATACAAGGTTTCACCTTTCATTGATTGGTTTTTATA  
ATTGCGGAGATGGGATGTAACTTTCCCATCGATTCAATTTTCAACAATAACAAAACCTC  
TTCTTTTTTTTCTTAGGAAGGGATTGCCTTATGGATTATGTATCTCCAATAGTTATACA  
TCATTAAGATTTTTGGA AAATCTGAAACAAGTATGAACGAGGTTAGAACCCCTTTTTTG  
TTCCAAAGTAAGCGGGGGTAAGATTATAGTCAAAGTCAATGGATTATTGAACTAATT  
GATTAAAAATACATTTTAAACCTTTGATTTGTAGCTCTCTGAATCACTACATATCTACA  
AGGACTCCCTCTGTTTTGAACAGATAAAAAAAAAAACACAAAATAATAAACTGCCAG  
GATCCCATTTAGATCGATATTTATGTACTAAATAATGAGTCAATCTTACGTTACGTAATC  
CAACCCCAATGGATCCTATCCCATGTTTGAGCTGGAGGATCGATCAATCGATATATCTAG  
ATCCAATATCTAAATTTTTTTATCTATTAATATAGATTTCAAATCTATATATAAAGAGA  
TCTTATCAGTTTAAATTTGATTTTCTAAGTTTCTAAGTTAAAGTACATACAGTAGAATT  
CCGATAAAGATTGAAACTCTTTTGTATACGATATGCCCGGTCCAATACCTAATGGGTTT  
GGTAAATCCTCACACAAATATGTTCTGTATACAATGAAGATCCCAATCATTAAATACATC  
TTTGATACCAAACTATCCAAATTTTTCATAGAATCCTTTGGATGTAGTGATGAAGTTGTG  
ATATATAAAAAATCTGTGTTTTATTTGTTTCATTGAAAAATGAATCTTTTTTCATTTCCGAT  
CTATCAATCAGATAAATGAGAAATGAATCGTCAAAAATGAGAAAAAATTTCTTAGTTTC

TATACCTGGACTCAGGGCATAACCGTCTAGTTCCAAC TATTCCAGAAGAACTTATAATAC  
GGAAAAGCCCGTGTTTTAAACGACCCCTGCCACGATACTAAGGATTATTGAGCGTTTA  
AATATTTATTTGAACGGGTCTTTATTCATCGATTCTAATATTTCTTAAAATAGATTGCAT  
TAAATCCCTCAATCTCGACGATTGAACATCATATGGACTATGATTATTTCGATGATGCCG  
CCATGGTGAAATTGGTAGACACGCTGCTCTTAGGAAGCAGTGCTAGAGCATCTCGGTTTCG  
AGTCCGAGTGGCGGCATCCTCTAAAAAAGGCACAATAGATCCTATAATGAATTC AATTCC  
GGATTTCCATTCCGTAATTGGGGATACCCCTTAAAAAAATATGATATTTGCCACTTT  
AGAACATATATTAAC TACATCTCTTTTCTATCATTTCAATTGTTATTACGATTCAATTT  
GATGACCTTATTAATCCATGAAACCGTAGTACTATTTGATTTGT CAGAAAAAGCCATGAT  
GGCTACCTTTTTCTGTATAACAGGATTATTAGTTACTCGTTGGATTATTTCGAGACATTT  
GCCGTTAAGCGATTTATATGAATCTTTAATGTTTCTTTTCATGGAGTTTCTCCATTATTCA  
TATGTTTTCTTAAAAGACGGAAC CAGAAAAGTTATTTAAGCGCAATAACCGCGCCAAGTGC  
TATTTTTACCC AAGGCTTTGCCACTTCGGGTCTTTC AACCAGAAATGCATCAATCTGCAAT  
ATTAGTACCTGCTCTACAATCCCAGTGGTTAATGATGCACGTAAGTATGATGTTATTGAG  
TTATGACAGCTCTTTTATGTCGATTATTATCCATAGCTCTTTTAGTCATTACATTTTCG  
AAAAAACCTAGATATTTCTCGCAAAAGCAATCATTCATTAATTGGGTCATTTTCTTTGT  
GAATGAAAAAGAAGCGTTTTACAAAACACTTCTTTTCTTTTCAATTTAGAAATTATCACAG  
GTATCAATTAAC TCAACAATTAGATCAGTGTAGTTATCGTGT CATTAGTCTAGGGTTTAC  
TTTTTTAACCATAGGTATTTCTTCGGGAGCAGTATGGGCTAATGAGGCATGGGGGTCTTA  
TTGGAATTGGGAGCCCAAGGAAAAC TTGGGCATTTATTACTTGGACCATATTCGCGATTTA  
TTTACACAGTAGAACAATCAGAGCTTTCAGGGTGTGGATTTCGGCAATTGTGGCTTCTAT  
AGGATTTCTTATAATTTGGATATGCTATTTTGGGGTCAATCTATTAGGAATAGGACTACA  
TAGTTATGGTTCAATTCACATTAACAAC TAATTGAAGAAAGGGCTGAAGAATACATAGGA  
ACATCGTCCCGTATATATATAAAGAAGGTTTGTGCAAGTTTTTTTCGAACCATTTGAATC  
AAGTAGTGATTCAAATGGTTCGAAAAAACTTTAGATGTATCTGATTATAATCACTTCAT  
TTTTTTTTTCTTTTCATTGAACGCTTTTAAAAATCACACAGTTCTTTTACATTAATGTAAT  
GTCTTATTGATGAAAAC TATTTATGAAAATAAATAGATAGAAATAGCTTCTATCCTGTCAA  
TTGATAGCGAGAGAACGAAATCAGGATAAATACCAATACCTATTACAGGTAG AAGGATAC  
AGACCGAAACAATAGTTCTCGTGGTCCAGAATCAAAAAAATAAGAGTTTGG AACGTTGA  
ATAGCTTGTAGCCATAGAACATCCGACGTGACATAGATAATGAATAAATAGGAGTTAATA  
TCATTCCAATTGGCCATTAGCTAAGTATTTAGTATTTTGGCATTTAAAGATATTTTCGGGC  
TAGTAATTATTTCAAAAAATACTACTGATTCCGCAACAAAACCACTCATTCCTGGCAATG  
CAAGAGAAGCCATCGAGAAGCTACTGAACATGGTAAATATTTTGGCATTGGGATAGCTA  
TTCCTCCCATTTTCGT CGAGATAAACAAGACGTATTCTATCGTAGCTCGTTCCTGCCAAGA  
AAAAAAGTGCAGCACCAATAAATCCATGAGAGATTATTTGTAAAATGGCTCCATTGATTC  
CCGTATCGGTTATGGAACCAATTCCTATAAGTGTGAAACCCATATGAGATACGGAAGAAT  
AGGCTATTCTCTTTT TTTAAATTTGCGTTGACCGAAAGAGTTGAAGTGCATAGATTATTT  
GAATCGCTCCTACTATCATCAACCAGGGAGAAAATATAGAATGAGCATGGGGTAATAATT  
CCATATTGATCCGAACCAATCCATACGCTCCCATTTTTAATAAGATTCCCGCTAG AAGCA  
TACATGTACTGTAATGTGCTTCTCCATGGGTATCTGGTAACCATGTATGTAGGGGTATAA  
TCGGCGATTTGACAGCATAAGCAATAAGGAAGCCAATATAGAATATTATTTCCAATCCCA  
AAGGATACGATTGCTTATAGCTAATGTTTCAAAATTTAATGTTGGCTCATTTGGAGCCATATA  
AACCCATACCCGGAAC TCCCATTAAGAGAAAAATAGAACCCCCGCTGTGTACAAAATAA  
ACTTTGTAGCTGAGTACAGACGTTTCTTCCCTCCCATATGGATACAAGTAGGTAAACAG  
GAATTAATTCTAATTCCACATGAGGAAAAAAGTAAAGGTTCTCGAGAGGAAAATGATC  
CTATTTGACCACTATACATTGCTAACATCAGGAAATGGAACAATCGCGAATCTCTAGTAA  
CTGGCCGAGCCGCTAAAGTAGCTAAAGTAGTGATGAATCCCGTCAGTAAAATGGGTCCCTA  
TGGAAAGTCCATCGATTCCCGGTCTCCAGTGAAATCAAAAGTATTTATCCATTTATAAG  
CCTCTTCTAATTGGATTAATGGATCGTCCAATTGGAATGATAACAGAACGCATAGGTCG  
TTAGAAGGAGTTCTAATAAGCATATACAAATAGTATACCACCGAACCACCTTATTTTAT  
TCCCTCTACGAGGGAGAAAGAAAATTGACGAACCCGCGGATATCGGCAAAAACAACATTA  
TTGTTAACCAAGGAAAAATAACTCGTGGTAAAGACAAGATAGACTTTGACCAGAAAAACCC  
GCGCTCGGAATAATTTCTCGAGTACGGGTTTTTGTGCGTAAAGAGGAATCAATGGATTTC  
AAGTGGATTTTTCTAGAACGTATCAATAAGCTAGACCCATGCTGCGAGTTGTCTCATGCC  
ATAAGTAAACCCGAACACTCAAGAAATCCGTTGGACAAGCGGATTACATCTCTTACAAC  
CTACACAGTCTCTGTCTTGGAGCAGAAGCAATTTGTTTAGCTTTACATCCGTCCCAAG  
GTATCATTTCCAATACATCTGTGGGGCAGGCTCGTACACATTGAGTACACCTATACATG  
TATCATAAATCTTTACTGAATGCGACATTGGATCTATAAATTTTTTGAAC TTTATTAATT  
TTGATCTGGCTTCATTAGTAATTGAATTATATATATTATGTTGTAGACGCCAGACGAAT  
CAGTGGTTTACCAGAACTTTTTTGATAATAAATCTATTTCTGGATCTGTT CATGAGCAAG  
GGCCAAGTACTTTGATTCTTACGTTTCAACAAGCATGGTCATACGAATCATACATGCT  
AGTTCTAAATTAGTGAATATTTTGTGGATATCTGTCTTTATTTATATCATTAATACTATT  
TATTCACAAATTCGATTGATTGATACGAGTTGATTTTCTGTTACGATGGATCGATGAAA  
CAATAGCCGGCCCAATAGCTGCTTACGCGGTGCAATAGCTATAACAAAAATCGAGAAAA  
TATCTCCTTTTAATTGACGACTATCAACAAATCAGAAAATGTTACGAGATTTATATTAA  
CCGCAATTCAGTATAAGTTCAAGACACATAAGTGCTCTAACCATGTTTCGACTTGTGATCA

ATCCATAAATACCGATAGAAAATAAATAGGCACTCAAAATAAGTACATGTTCCGGTCATCA  
TTGACCACCCCTCATCAATTTTGATTCAATTTCAATATGAACAACAATTTACCGATTG  
ATTAGAATATAAATGAAGTACGAAACAAAGTAAAGGTATTAGTAATGGATCGAACTAAACC  
CCTTTCATTTTCATATATGAACAATAGAAATATGAAAATGGAACCTGAAGGAAAATGGATGT  
GATAACATAGAACAAAACAAGACTTTATTTATTTTATTTTGGATCTAAGTATTTA  
TTACTTAATTACTTTACTGCCGGGCCATAGCAATTGCACCTATCAAAGCAACTAAAAGAA  
TTATAGAAATGAGTTCAAATGGAAGGTAAAAATCTGTTGATAAATGAATCCCAATTTGTT  
GAACGTTACTTGTAGGTCTGCTCTATAATCTGATTTGATCTTGTAGTCCAAACAATCC  
CGTACCACGACGTATCCGAGATAGTAGTAATTAGTGAAAAAGAATACTTGTACAAACCA  
GTGAAGTGACCCCATCCCAACGGTCCAAAGATAGAAATCTTTGTAATATTCTGAACCAT  
TCATGAACATCACAGCAAATAGGATTAAACATTTACAGCTCCTACGTAAATAAGGAGCT  
GTGCAGCAGCTACAAAATAGGAGTTAGATGGAATATGGAATAAGGATATACAAACAAGAA  
CCAGTCCCAATGAAAAAGCAGAATAAATTTGGGTTGGTAAGTAAGACCACCCCCAGACCCC  
CTAATATAAGACCTGATCCAGAAATACTAAAAGAATATCATGTATTGGTCCAGGTAAT  
CCATTATGTGTAAAAAAGAGATAAATAAATCGAAATATTTTCATAAACTTACTAACCAGAC  
CCAAGAAAAAAGAGGTTACCTTATTTTTTTCTTGTATATGATACGTTCTAATTGAATCC  
TAAAGGGGTGTAGATTTATATAGATACAGTTATTTGGATCAATCCCGCTACTGTATCTGAA  
AGAGTAGTTCGAAATTGTATATTTTGAATCATCACAGATCTATGAATCCATCTCTAAATC  
AAAATCAAGCCTTGATTTCTACCAATCAATAGTTATTTACTGACCTAGCAAAATGAAAGA  
AGCCTCACTCCTTTACTTTAAATCAAAACGGAATCTTAGTAATTGGTAATCGTTTTTGA  
TCAAGAGGTTTACCCCTGATTATTTTGATTGGAGTCGAATTCGTAATTGTTTGAATGTG  
TAATCTCCAATTACTGACATTGGTAACCGGCCAAAGCAATTTGATTATAATTCAATTCG  
TGACGATCATAAGTAGAAAGTTCATATCTTCAGTCATTGATAAACAGTTTGTGGACAA  
TACTCGACACAATTACCACAAAATATACAGATTCCAAAATCAATACTATAATTAAGCAAT  
CGTTTCTTTCTAATATCCGTTTCCAATCTCCAATGAACAACGGGTAGATCTATGGGGCAT  
ACCCGAACACATACTTCAACAAGCAATGCATTTATCAAAATGGAATTCGACCACGA  
AAACGCTCCGATGTGATCGACTTTTCATAAGGATATTGAATAGTCACAGGTAAACGATTC  
ACGTGAGATAAGGTAATCATGAACTTTGACCAATATACCTTGCAGCTCGTATGTCTGT  
TGACCATAATTATGAACCCAGTCACCATAGGGAACATATCGTGGATATCCATGAATAGT  
TTGATGTTTCTTCTCTGCTCTAGATAGGTTATGAATCTAGAATATCATATTTTGTAT  
AGCGAAACGAGTTGGGAAGTGTGTTAATAATAGATTACCTAGAGAAATAGGTAAGA  
AATTTCCACCCAGGTTAATAGCTGGTCCATTCTCATCCTAGGTAAAGTCCATCTTGTT  
GTGATAGGAATGAACAGGAACAATAAGCTTTAGCTAATGTAATAAGGATACCAATTGTC  
ATTCCAAGACTCCACCTGTTTTATTTATTTCCAAAAGGTTTCAGAAATGAATATGTACGGA  
ATAGAGAAATTCACCCGCCCAAGTAAGAAGTGTACAAAATAATGAAGAACTAGTAGA  
TTTAGGTAAGAAGCAAGTAAAAATAACCAGATTAAATACCTGAATATTCGGTTTGATAA  
CCTGCTACTAATCTCCTCTGCTTCTGTTAATCAAAAGGTAATCTTTACATTCGCT  
AGGGAAGAAATTAGAAAACTATAAACCCCTATAGGTTGACGCCACAGATTCCACCCCAA  
AACCCATATTTTACTGTGCTCAACTATATCAACTGTAATGTAATGTAATGTAATGTAAT  
AGTCGATGATAACATCACTATTTCCATCGCTATTTCCAGAACCGCACATGAGACCTCAGCT  
TCATACGGCTCCTCGATGGCCACAAATAAATCTAAGGACTGGTTCATTATTACCTCGGCA  
TGTTTGTAGTGTAGATTAGATAAGATGTATCGAAGAGTCCGGAATTAGACCAATGGAA  
TTCCGTCGCCATAATAATAAAAAAAAAAAAAAGCGCTTCCGAATTGATCTCATCCTTTA  
TTTTCTAATTAGACTTAGAATCTTTTAGTTTCTAGTAATAACTTAATCCTTCAATAAAATA  
CTCGTTGTTTCAATAGATATTTTCGACCCATACTTTTCTGACGAAAAAGAAATTAGACACTA  
ATTCATGAGTTATAGTTGATAAATCATTATAAGAATTCTATCCGTATAAATATGGATAGG  
ATTGAGGAAGAAAGAAATAAACAAGATCTCTTATTATTCAGTTTTCCTATTGCATTCCA  
TTTCTTTCTGTTCTGTTCTTCTCTCACTCAGAAGGGGTTTCTAAAAAATCAAATCAA  
AGGATTACTTCTGTTCTCGACAGTCATTTATTTAATCAGTGGATAGAAGCATACTCTGGAT  
CGGAATCGTGAGGAAGTACTGCTTGATCATTTCTACGAACTTAAAGCCCTCATATGATT  
CCTTTTATGTTATGCAGAAATATCCCTTTGGATACCTTACATTATCTTCATCACTAATCC  
TTTGTGTACCTTTGTGTTCTTAACCGTCCACTATTTTGTATTGATCCCGGTATGGTAA  
TACATACAACATACACACATACAACAACATACTATACAATAGTAGAACTCCATACAGT  
TGATCTTTTGCACCCGCTCAAGTCATGATGACTAATCAACCAATCTTGGGGTAAACAGT  
TTCGACCGCTTATGTTTACTTCCACTTTACTCTCGTACATAGGGAATGAGAATCAATCTT  
CTTACTGCAAAATCATAGCTGTTTTGTTTCACTCATATAACTATCTGGTTTAACTCATC  
GACCCGAATGATGAATAAAAAGAGAAAGGTATCTATTCAACACATCCAACCCCTTTCCCTT  
TATTTCCAGGAAGGGGTAAAGGTTTCTGTTTCCACGAATCACACGTAGAGATATTGATA  
ACACACACGGAGTTAATGGTATTTTATAAATAATAGATTGAGCAGCAGCTCGTAGACCAC  
CTGAAAAGGAATATTTATTTATTCGATCCATATCCTGACATAAGAAGTCCAATAGGAGCAA  
TACTGGAAATAGCGATCCATAAAAAACGCCTATACTGAGATCGGCTAGAACAAGGCGAT  
AGCCAAAAGGAATTACTAAATAGCTTAGTAGAATTGATATGACCGCTATAGATGGCCCCA  
TACTGAATAAACGAACATCTCTCTAGATGGGAGAAGATCCTCTTTCAAAGTAGTTTGG  
TCCCATCTGCTAGAGCTTGGAAGAATTCCCAAGGGGCCGATATTCAGGCGCGATACGTT  
GTTGTATCCCTGCAGATATTTCTCTTTCTAACCACACAATCACGAGTACGCTATTGTGA  
TTCCCGATACAGGAGTAAAAATAGGACAAGCAGCCATAAGAGGTCATAGACCTCTTTTA

AGGATTCCGATCTGGAAAAAGAATTGATAGCTTGACTTCTGTGCGTATCAATTATCATTT  
CAACGATCAACTTCTCCCATAAATGATATCTATACTACCTAGTATCGTCATGATATCCGCC  
AATTTCAATCTTTTAAGTCTGAGGAAGAATTGCAAATTGATGAAACCAGGTGGACGA  
ATTTTCCATCTCCAGGGAAAAACACTATTATCCCTATCAGAAAAATCCCAATTCTCCC  
TTTGGGGCTTCGACTCTCACATAAAGTTCTTGTTCGACAATTCAAAGTGGGAGAAGGC  
TTTTTACTAATGAATCGATATTCAAAACCATTCATTTCGGAATCACTTGCTCTATCAAAG  
CGTCGAACTTCTAAGTTCTCATAGGGCCCCCGGAATTCCTTCTAGAGCCTGTTGAATA  
ATTTTTATGGATTCCGTCATTTTCATTGATTTCGTAATAACGAGCTAATGAGTCTCCT  
TCTTTTTGCCACTGGACTTCCCAATCGAATTCATCGTAACACTCATAATGATCAACTTTA  
CGAAGATCCCATTGGATTCCGGAAGCTCGTAGCATTGGTCCCGATAAACCCCAATTTATT  
GCTTCTCCCCACCAATAATGCCACCCCTTCAACTCGTTCCAAAAAATGGGATTTTGC  
GTAAATAAGCTTTTGATATTCACAAATTCCTGTTAAAGAATAATCGCAGAAATCCAAACAT  
TTATCTATCCAGCCATGAGGTAGATCAGCAGCGACTCCCCGATACGGAAATAATTATGC  
ATCATTCGCATACCTGTGGCAGCTTCGAATAGGTCATATAGCAATTCCTTTTCTGTGAAA  
ATATAGAGAAGGGAGTCTGTGAACCGATATCTGCCATAAAAGGTCCAAGCCATAATAAA  
TGAGAAGCTATACGACTCAGCTCCAGCATAATTACTCTGATATAGCTGGCTCTTTGGGT  
ACTTGAATATTTCTAATGTTCTGGTGCATTTACCGTTATTGCCTCTGTGAACATAGTA  
GCTAAATAATCCCAACGTGTTACATAAGGAAGATATTGTATAATTGTTTCGGTTTTCGCCA  
ATTTTTTCCATCCCTCTGTGTAAATAACCCAATACGGGTTCGCAGTCAATAACATCTTCA  
CCATCTAGAGTAACGATAAGTCGAAGAACACCATGCATTGATGGGTGGTGAGGACCCATA  
TTAACTATCATGAGGTCTTTTCTGTAGCCGGTACATTCATATGTTTTCTTCTCCGATCC  
ATTATTCTATGAATTGCCGAAAAGGAAATAAATGAGGTTTCATCAAAATCAAGATCTAAT  
AAACCAAGAATTCAAATAATCTTCAAATTAACGAGTTTTTGGTTCCCGAATATCTAATT  
GATCGATTAATTTTTTATAACGCACTCTATTTTTCTTTGACAAATAAGCCAGCAGTCGTT  
GACGTTTTCCAGAATTTCCGCAAACCTATCTGAGATAAATAATCTTTCTGTGCAATT  
CAAAATGTGAAGTAAGTCTCTGTATCTTATTGGTGAACCTGATTACTTGAAATTCACAG  
ACCCTTTGTTTTTTTCTTCTTTCGGAATAACTGAGATGAATGAATTTTTTACCATAACCA  
TAAAAATAAAATTTCTCTCTCTTTTTTTTTTTTTTCCACAGATATGGATTTTACCAATC  
AGGAATAATAAATGCCAGTTATTTTGATCTGATACCCCAATAATCTGGATTTATTCAT  
TATATTACTTTATCTATATTCTATCAAATCAAATCAAAATTAATTCAAATGAATTGTA  
AGTACAATTTGTAATTTGATTTCGATAGAAGGCAATTTTGTACCCACAAAAGAAAATTA  
TTTTGACCTAAGAAGATTCTGCCAAATCATTCTAGATTCAATCCAAATCCGACACCTGA  
TATATAGGAAATGTACCAACCATCAACTAATCCGAATCGTGGATACATATGTATCCTTG  
ACATACTGAAACGGCTGCCATTATTGGTATCAAACAGTAGCGATTATACAGCTAAAT  
CCTCTAATCGATAATTGGGCCAAAGAAACAATTTGAATTGAATGAATTTATTTATATCTG  
TATCAATATGCTTGCTCCTCATCCAAAAATGTCCCCAGTTCCTTACATGTTGTGATTGA  
AAAATACCGGATTTCTATCCATAGCATTCTTATTTCCGGAATTGAAACAAATAGAAATTC  
TCAATTCCTACGACGCCTAGGGGATAGAATATTTTCAGGAACAAGCAAATCATAATGAT  
TTTCGTCTCTATTCACAAGCATTTTTTATGTTGTACAATGGATCCATTGAAATAATTCT  
CATCAACATATCTTTTTTCTCGATATCTTCCATTAGTTTGGCATTTATTTATATGGACCA  
ATGAGATACCTATGGTTTGATACATAATAAATTGCTATCCCATTTTATAGACAGCGTA  
CTGGTTCAAGAAATCAATATTCCTTTTTTATCAATTCGGAAGAGTTGGATTCTGTCTGAA  
TTAACATTACATCCAGGTGCATTTCTCCTCCTGAATAGAGGATATAGCAATTTCTTTTG  
CATTTATTAGTCTAAGCAGGAACAATATACCTAACATTATTGAAAATCTGTTATTCA  
AAAGATCATCCCATCTCAACTGAAAAAGCAAATATTTTTTCAGGAATAACTCTGTTTTG  
CTTTCTTGTTACTCTCGGGTTGTCCTTTCTTTTCACGTTTTTGAATGTCGGATTCCGTTG  
AATCCTTTTCAAAATCTTTTTGTCGTTTTCTGTCGCTGAGCCAATATTTCCGTGGCCGA  
GCTGTTCTTTTTCTTCTGATTTCGATTCTTTAATTCAAGATATTCTTTTTGATTAGATG  
ATATACGAAGATCCTTTTTTTGATTTTCATTAATGTTTTTGTTTTCACTAATGTTTTCAT  
TTCCATTAAAAATCAAAAGAAGTAATTGATTGGTATAATCCACGGTTTGATCTTATATG  
CATCATAAAGTGGCACAAATTCGAGAAGAACCAAGATTTTCGTATTTAATATGGGGCGAT  
ATAGCATTTCTTTATTCATTCCCATCAAAAAAACTTTTTTTTTTGATTGGGTGGGTGTA  
TTTCTTGATGAATCGTGAGATAGAAAAGATCTTCTTATCAATCATTTGATAATAATAAG  
TCTCGGTCTTAGTCATTTTATTAATGTTGGTCCCGGTATCCGTATCGGTCCAGGACTCAA  
TATCGATATTCTTTCTAAGAAATAAATCGAAAATTTTCCACTCCAAATATTTTCTATCCG  
TACTTTTACCCGTACCAATAATAGACTCTTCTCCTAGATAATCACTAATACATATATCCC  
CCAGTACATAAAATGGTTCAATTTTAGGTGTGTTGTAATTATATGGAATCTCTCGGTCCCT  
CGTTTACTTGTAATGAGGATGGATAAAATATATGAGTCTTTCCTATCCCCATAAATAATAT  
ATTTATATGAAAAAGATCATATCTGTAGTTTTTTTTTAATTTTGCTTTTTTATCGTCA  
ATGAATTCACCTTCATAATCATTTTTTTTCTCGTAATGAATGAATTGGGCTTTTTCATATG  
AATTCCTTTTTTGAGTCTTTATTTTGAATCGTACGACGCCGATTGACCCTAGTTCGCCATT  
TTTGCGGTACTAATTTAGACCACCTAGCCTGAGATAAATGTAATTGATAATGACCCCTTA  
ACCAGTTTTTCCACTCATTCATTCCAGAATTCGGAAGTTTTTATGCCTTGATTGGAAT  
CTAATATCTTCTGTGTTCCAAAAAATCCGGATTCTATCCTTAAGAATAAGATATGCTT  
CGCGATATTGAAGTAGAGATCTCAAATGATACTTCTTATTAATAGCTTGGATTGTGATA  
ATTTGTAAATACAGATGCTTGTGAAAAGGAATATAGGTACCAGAAATCTTTGATTTAT

TTTACTAATATTAGAAATATACTTTTTTATAGTCGAAATAAAGTGCATTTTTTTTTGAT  
TTATTTTCATCAATCCCTTCTTTGTGAATGTATTTATCGATAATCTTTTTTGTGTGATTCAA  
GGAAAAGTTGTACGTTGACTCTAGAAACATTAACAGTATATAGAAAGATATGTATGTATA  
TTCTTTTCGTCGAGAAATGTCAAAAAATAGTGCCATTTGCGTATGAATATGAATCTGTAC  
TTTTTCCTTTTGATATCTGCCAAATATGTTTCTGCGATTCCGATCTTTTATCACCACAAC  
TTGTATCGTTAGGACTAATATTTATATCCGGAGTTAGAAATATTTTTCTTTTGTCTTTTG  
CACCCCTTCTATTTGATTTCTGATTAGGGTTGTTCTATCGGACAGATCTTTCTTTTTTT  
TTTCTGTCAAGTGAATAATTTGCCCAATCCATGAATCTAATTCGAATGGTCGATGTCGATT  
TAGGAACAATTTTATTACTGCTTATGATTATGAATCTTTTCCATTTTCATTTCGGTTCAT  
ATACTTTCTTCAATACAAATAAGAAAAATTGGATTTACGTTTGCAAACTCTTTTATTTTTC  
TTTTTAAAAATAGAATCGTTTGTATAATCCATCTTGTTTTTTCTTTTGAGACCTTTCTAA  
ACTGTTTTGTTTTTTTTTTTGAAACTCTTAGAACTAGAAAAACATTTTTTTTTTCACTTTTA  
TCTTTTTTTTTTCGAATTCATTATAAATAGGTTCAAAAAAGGAAGGTTGTTGTCTGGGCAG  
AACCAAAAGGTAGTTCGGTTTCCCTTTCCCGAGATTGTTAAAAAACAAAAATTTCTGTTT  
TCCCTTTCTTTTGGATTGGATCTCTATGATGGGATCGTAGTTGGATTGCGCCAGGGTT  
TCAGACAGAAAGGAAATAGGATTTTTATCTGAATACCATCTGTTAACCAGTTTTCGGAA  
ATTCTGTTTCTGATAATTGAACACCATTATAGGTGCATTTAACATGCATTTCTCTATTCC  
ACTCCTTCAAATCCTCGTACCCTCGGGGAATTGAAATAAGAGCATACGGCCGAGGTTTT  
TAGCTATTATCAATGAAGGCAATATGATGTATTTCTAAGAATCGATTGGGTTACTAACA  
TAGTACCTCTTATTTGCTTGAGCAAATATAAGAGTATCCCATGTTTCTGCTATTGCTATCC  
GTTCAATTCTCGTTTTTTTTTATCTTCAATTTTTTTTGCCTCTTCTTTGCCTCTTCCTCCT  
CAGAATCCGAAGTTTTGAGTTTTCGGTCTGTATCTATCCAATTTCTAAAAATTAGATTCA  
TTGTTTCGGAGATATCAAAAGAAAAAAGTTTTGTCTATTCTGTCCAAAAAAGCA  
GGGAATGTGCATTTCGCTTGAACATTTCCCAATAACCATTTTACGCTTTTGAGCGCGTA  
TGGATCCTTTTACTATATCCCGACGAAAATCTGATTGTTGCGAGTAACGTACCAAAGCCA  
ACTCTTCTGCTTGTACATATTAGTACTGGTACTAGTATGAGTATTGGTATTCTGATCCG  
GATCCGCCTTATCAGTATAAATTACCACACGTTTGGCTTTTCTGAACGAATCCCATGAT  
TTTCTGTTGATTCTTCTGATTCTTCCTCATTTTCTCCTCCCGCTCTTCAAAAGAATTGA  
TCAATTTGTATGATCGTCGAGGAATCTTTTTACCGATTCTTCTATTCCAATAGATTTAT  
TTTGAATTGTTTGATTATTTTGATCAGTTGTAATTACATCGAATAGAAATTTCAAACATT  
TTTTTTTGATTTTTCTGAATCAAAATCTTCTTTGTTTCGGATATTAACAAAGCTTTTAAAA  
TCAGACTAAAACAGTTCTTGATTTCTAGCTAATTCACTGATAGAGGTCAAGAAAGGAC  
CAATGTCTGTGATAATGGTTCTCCATTAAAAGTATCCGTTTTAGGTTCAAGTTTTTGGT  
AATCAGTAGGAAGCCTATCATGAATCTTATTTATCCAAACCATTCATAG  
TCCCTATAGAATCTTCTGTCCCTATAGAATCTTCTGTGCAAGTGATTGAGTCATCCACCA  
TTGAACGTGAATACATTTTTTTTATTGTTCCAGATATGGTCCGTTTTAAAAAAGGATCAT  
ACACTCTAGGCAGCATCTTGGTTATTCTTATCTTCTTGGTTATTCTTATCTTCTTGGT  
TATTCTTATCTTCTTGGTTATTCTTATCCTCTTGGTTATTTTTATCATTATACAATCTGG  
TCCTTTTTTCAAGCACATCCATAGTAAGAGATCCCTTGTTTAGAACTCTATTTCGGTTTA  
TGAATTCATTGCTCAAGCTGTACCTTTTTTGTTCATTGGTATAAACCAATGATTATACA  
GATCTTCGGGGGATAGTTTTTCGGTCGTACACAAAGACATCTTCTTTGCATCATTCCA  
AAAAATCGATAAACTGGGTGGATATGTAAGATATATTGTTTTTCCATCAACTGGAC  
ATACGTGAAAAAATATTGTGACATTTCAATTTCTTACAGCATTTTGAAATAAATTTTTTT  
TTATATATCTCAATGGACGATTACATCGTTTATAGTCGAAAAGAAGATTCACAAGAGGTT  
TTTCAAACCAGAGAGGCTTTATCTTCTTTCTTTAAGTATTTCTAACTTCAAAATTT  
CTTGCCTCTTTTTTTTTTCATGATGTTTTTTTGGATCCTCCCTTTCTTCCGAACAAAGGG  
AAGGGTCTTCTTCGGTGGATCCCTCTTGTTCCTGTTTAGTCCCTTCGTTTCGGAAGTTT  
TTTCTATTCTACATCTGTTTCTTCTCACTTTCCCCCTTTCTTCCGTTTTTTGAGGTTT  
CTTTCAGTTTCTTAGTGACAATAGGCGACGGTATTCTGCCTAAATAGTAGACACAGGTGA  
TAAATAAGAGAATAGTAAAGATTCGAGCCATAGAATTTCTCAATTCTGACACAAGGTA  
TATTAGATCGAATAAGTACATTTCGATCTAATAGAATGATTTTGCCGTATCCAGAATAATA  
CCAATCCAACCCATTTTCATGAAGAAAATGTGACCAATTAACCAACCAACAAACTACTTG  
TTACAAATAACATCTTGTGTTGTCATCGAAACATATAAATGTTGACTAATCTGACTAACG  
TTGAACCTGGTAAATGAAATGGTTGAATAATTGAAAAATGAGATTATTCAGGAATACAC  
ATTGAATGCTGAGATTACGCATTGAATTTCTGGTAGTAGATCCATAATCCAAAAGTGTT  
TGTGATTGTTCCAGAAGAAATGAAACAAAAGATACGGTAGAACTAGGACAGTTATTGTAT  
GAGGTCTACCCAATGCTAGATGCAGAGGCGCATAATAGATCGATATGAACATCATGAGCT  
GTCCCGTAATAAAACCACTGTTGCTGATACCTCCTTCTCGGTTCTTCTTCCATAATCC  
TAGCTCGGAGAAGGAAAAGATAAGAGGGCCCTATGGAGAATGTGGTCAGAAATCCATAAT  
AGAGTCCGACCACAACGACCGAATTTATATCTTCATGCATAAGGATAATAGATTACCTA  
GTAGAAAAGATTTCAAAATCATCACAAACCTCCCTTTTTTCTTTTCTATTGCAATTTCTC  
GATTACTATATGATGATTCTTCACTTTCCATAGATAGAAACAGATAGACTAGAAATGAC  
ATCTTTTATGTCAATGATACCTCTTCTTCGATTGAATGACATCTCTTATGTCAATGACA  
CCAAAGGGATATTAAATGAATGGAATTGGGATATGGATGGAATATTGGGATATGGATGGA  
ATATAATGAAATAGAGCCACTTTGAGGTTCCCTATGAAATGAGGCATGGAACGGAGCCAC  
TACGAAGAAGTTCCGGGAGTTACGAAGGAAGCTTCGGGCTCATATTGGTCATGGGTTGAG

AGCGGGAGTTGAACTCTATGAGATCGAATCTCCCGTTATTCCTCAGTAGCTCAGTGGTAG  
AGCGGTTGGCTGTAACTGACTGGTCGTAGGTTCGAATCCTACTTGGGGAGATTTGATGA  
ATTCTTAATTAAAGAATTACAGAATTAAAGGGCTCGCTTTGACCGTTAGGAGT  
AGTAACCCGTTCCCTGCTTTTGTTCATTGCACTCTATCTCATCGCATTCTGTTCTGC  
GATATTTGAGAATCACCGTCAATACCTCGGTGTAGATCCGGGATAATCCTTTGTTCCATA  
GCCCTGGGGCTATTTACAACCTAGCCAATTCATAATTCTCAGATGATGTACTAGCAGTGCA  
TCAAAGATGCAGTCATCGATTCTCCCGAGAGGCCACAAATTACCGCGAGCAAACATATTAA  
TGACGAGGAACGCATTTTTGTCTATGCTACTAATACTTGTATTTGCTCTGCTATTCTTCCC  
AAGCCTGGCTGAGGAAGAGTTACGGGGAGTAAAACACAAATATGCTGATTCGGGCCAGGC  
ATACTATATGTATCGATTTTTTCTTACGATAAAATAAAAAGAATAAGGCCATTTTCGACA  
AAAGACCCACACCCAGTTCCATAGCTTTGCGTCCGCTATCCCGATCATGATTTTCCTAC  
CCCCAGAGGTAAAGGAAAGGTCCTTCCCTTTTGGGCCGGTTGTGGGCGAGGAGGATTCTG  
AACCCCGACACCGTGGTTCGTAGCCACGTGCTCTAATCCTCTGAGCTACAGGCCCCACC  
CCGTCTCCACTGGATCTGTTCCCTGGAGTACCCTCAAAAAGGAACCTTTTCTCCCCTCAG  
CCATTTCCGGTTAAGAAGACGTGAAAGCGCCTTCTCTCTATAAGAACAGCGCTTCCGA  
GGTGTGAAGTGGGAGAGAAGGGATGTCATAATTGGGTTTTGAATAAGACGACCTTTTCAT  
TTTTTTCTTTTTGAGTAATAAGAATAAGAGGTGTTAAGCTTTTTATCATCCTGGCGTCGA  
GCTATTTTTCCGCGAGGACCTCCCTACAGTATCGTCACCGCAGTAGAGTTTAAACCACAA  
GTTCCGGGATGGATTGGTGTGGTTCTCTACGCCTAGGACACCAGAATATCGAACCATGA  
ACGAAGAAAGGTATGAGAGAAATATTGGCTAGTGATTGTGAAGCCCAATTCTTGACTGG  
AAGGGACACCAAGGCCTCTGCCCTTCCATCCCTTGGATAGATAGAGAGGGAGGGCAGAG  
CTTTTGGTTTTTTCATGTTGTCAAACAGTTGAACAATGAAAATAGATGGCGAGTGCCTGA  
TCGAATTGATCGGGTCATGTAGGAACAAGGTTCAAATCTCTCGGTCTGTTAGGATGCCTC  
AGCTGCATACATCACTGCACTTCCGCTTGACACCTATCGTAATGATAAACGGCTCGTCTC  
GCCGTGACCTTATCTTGGATTCTCAAGACTTCTGTCGCTCCATCCCCGAGGGGCAGAGA  
ACCCGTCGCTGTCTCGGTGTGCTACCGGAGGCTCTGGGGAAGTCGGAATAGGAGAGCAC  
TCATCTTGGGGTGGGCTTACTACTTAGATGCTTTCAGCAGTTATCCGCTCCGCACTTGGC  
TACCCAGCGTTTACCGTGGGCACGATAACTGGTACACCAGAGGTGCGTCTTCCCGGTCC  
TCTCGTACTAGGGAAAGGTCTCTCAATGCCCTAACGCCCACACCGGATATGGACGGAAC  
TGTCTCACGACGTTCTGAACCCAGCTCACGTACCGCTTAAATGGGCGAACAGCCCAACCC  
TTGGAACATACTACAGCCCCAGGTGGCGAAGAGCCGACATCGAGGTGCCAAACCTTCCCG  
TCGATGTGAACCTTGGGGAAGATCAGCCTGTTATCCCTAGAGTAACCTTTATCCGTTGA  
GCGACGGCCCTTCCACTCGACACCGTCGGATCACTAAGGCCGACTTTCGTCCCTGCTCGA  
CGGGCGGTCTTTCAGTCAAGCTCCCTTCTGCCTTTGCACTCGAGGGCCAATCTCCGTCC  
GGCCCCGAGGAACTTTTGACGCTCCGTTACCTTTTGGGAGGCCTACGCCCCATAGAAA  
CTGTCTACCTGAGACTGTCCCTTGGCCCGTAGGTCTGACACAAGGTTAGAATCTAGCT  
CTTCCAGAGTGGTATCTCATCTGATGGCTCGGGCCCCCGGAAGGAGGCCTTCTTCGCCC  
TCCACCTAAGCTGCGCAGGAAAGGCCAAAGCCAATCCCAGGGAACAGTAAAGCTTCATA  
GGGTCTTCTGTCCAGGTGCAAGTAGTCCGCATCTTACAGACATGTCTATTTACCCGAG  
CCTCTCTCCGAGACAGTGCCAGATCGTTACGCCTTTTCGTGCGGGTCGGAACCTTACCCGA  
CAAGGAATTTTCGTACCTTAGGACCGTTATAGTTACGGCCGCGGTTACCCGGGGCTTCGG  
TCGCCGGTCCCCGTGTCATCAGGTACCAACTTCCTTAACCTTCCGGCACTGGGCAGGCG  
TCAGCCCCATACATGGTCTTACGACTTTGCGGAGACCTGTGTTTTTGGTAAACAGTCGC  
CCGGCCCTGGTCACTGCGACCTCCTTTGTGAGGAGGCACCCCTTCTCCGAAGTTACGGG  
GCTATTTTGCAGGTTCCCTAGAGAGAGTTGTCTCGTGCCCTAGGTATTCTCTACCTAC  
CCACCTGTGTCGGTTTCGGGTACAGGTACCCTTTTGTGAAGGTCCTTCGAGCTTTTCCT  
GGGAGTATGGCATGAGTTACTTCAGCGCGTAGCGCCTGGTACTCGGACATTGGCTCGGG  
GCATTTCTCTACCCCTTCTTACCTGCCCCAAAAAGCAAGGTGACCTTGCGTCTTGA  
ACCGATAACCATCTTTTCGGCTAACCTAGCCTCCTCCGTACCTCGGGACCAACAAGGGTA  
GTACAGGAATATTCACCTGTTGTCCATCGACTACGCCCTTCGGCCTGATCTTAGGCCCTG  
ACTCACCTCCGTGGACGAACCTTGGGAGGAACCTTAGGTTTTCGGGGCATTGGATTC  
TCACCAATGTTTGCCTTACTCAAGCCGACATTCGCTTCCGCTTCGTCCACACCTGCTC  
GCGCGGGAGCTTCCCTCTAAGCGGAACGCTCCCCACCGATGCATTTTACATCCCACAG  
CTTCGGCAGATCGCTTAGCCCCGTTTCATCTTCGGCGCAAGAGCACTCGATCAGTGAGCTA  
TTACGCACTCTTTCAAGGTTGGCTGCTTCTAGGCAAACCTCCTGGCTGTCTCTGCACCCC  
TACCTCCTTTATTAAGAGCGGTCATTTAGGGGCTTAGCTGGTGATCCGGGCTGTTTCC  
CTCTCGACGATGAAGCTTATCCCCATCGTCTCACTGTCCGAACCTTGACCCCTGTTATTT  
TGGGTGATATCTAGTATTCAGAGTTTGCCTCGATTTGGTACCCTCTCGCGGCCCGCAC  
CGAAACAGCGCTTTACCCCTAGATGTCCAGTCAACTGCTGCGCCTCAACGCATTTTCGGGG  
AGAACCAGCTAGCTCTGGGTTGAGTGGCATTTACCCCTAACCAACTCATCCGCTGA  
TTCTTCAACATCAGTCGGTTTCGGACCTCCACTAGTTTACCCCAAGCTTCATCCTGGTCA  
TGGATAGATCACCCAGGTTCCGGTCCATAAGCAGTGACAATTACCCATGAAGACGCGCT  
TTCGCTACGGCTCCGTTGGGTTCCCTTAACCAAGCCACTGCCTAAGAGTCGCCGGCTCAT  
TCTTCAACAGGACGCGGTCAGAGATTCTCTCCCACTGCTTGGGAGCTCACGGTTTCA  
TGTTCTATTTCACTCCCCGATGGGGTTCTTTTACCTTTCCCTCACGGTACTACTTCGC  
TATCGGTACCCAGGAGTATTTAGCCTTGCAAGGGGTCCTTGCTGATTCACACGGGATT

CCACGTGCCCCATGCTACTCGGGTCAGAGCGTAAGCTAGTGATGCTTTCGGCTACTGGAC  
TCTATCCATCTAGGGTGAGCACTCCACCGCTTCGCCCTAGCAGCACGACGCTTGTATTGC  
TCTCCCAACCTCGTTTTACGGTTTTAGGCTGCTCCCATTTTCGCTCGCCGCTACTACGG  
AAATCGCTTTTGGCTTTCTTTTCCCTCTGGCTACTAAGATGTTTTAGTTTCGCCAGGTTGTCT  
CTTGCCTGCCCATGGATTGAGCAGCTTCGAAAGGTTGACCTATTCGGGAATCTCCGGA  
TCTATGCTTATTTCAACTTCCCGAAGCATTTCGTGCTTACTACGCCCTTCTCCTCTC  
TGGGTGCCCTAGGTATCCACCGTAAGCCTTTCCTCGTTTGAACCTCGCCATTATGTGTG  
GCTATGCCATCCTAAGGTGCTGCTAAATGGAAGGATCTTATCAACGTCCATGAATGAGAA  
ATCATAGATCGAACTGCCGAATCGGAAAAATTGGGTGCTATCATATACCTTTGCATCGGC  
TAAGGTCACGAGCTGGAGATAAGCGGACTCGAACCGCTGACATCCGCCACAGGGTAACC  
ACCGCCTCTCGGGCTCCCCGACTGATTCTATCATAGAGGCCAACGATAGACAATAACTC  
CCCCCGAACACAGCTTACAACCTTCATCGTACTGTGCTCTCCAAAGAGCAACTCTTCTC  
AAAATCTCAAAGGTGCTGAGTTGGAATCCCATTTCTAAGGATTCTTGTGGTTCCCGAGGA  
TCCAGCTACACGAGAACCAGGAACGGGGAGCTCTTCCCTTTTTCCGCCGACTCTTTGG  
TCTTAAGAATGCTGGTTTTTAAGAATGAGTGATGCGCTTCTCCGACCTTACTGCCAAC  
CGGAGAGCGGACAGCTAATGCGTTCCACTTATTGAACAGGGTCTATGGTCGGTCTGTGAC  
CCCTGGATGCCGAAGCGTCTTGGGGTGATCTCGTAGTTCCTACGGGGTGAGACGATG  
GGGTCCGTCCATGGATTTTCTTCTCTTTGCCACATTCGCTCAAAGGGTTGAAGGGAGA  
TAGTGATCAAGCTGTTGCAAGGGCCAACCTTGATCCTCTTCCCCAGGGATCCAGATGAG  
GGAACCCCTAGGAGAGCGCCGACTCCAACCTATCGTCCATGTACGATCCATACTAGATCTG  
ACCAACTGCCCATCTACCTCCTCTACGTTCTTGACAGCCCATCTTTGTCTCAGTAGAGT  
CTTTCAGTGGCATGTTTTCGGTCTCTTCCCCATTACTTAGAAAAAGTGAGCCACCGGTTT  
AGGTACAAGATAGTATCATTTACCGCCTGGACAATTAGACATCCAACCCGTAATCGCAACG  
ACCCAATTGCAAGAGCGGAGCTCTACCAACTGAGCTATATCCCCCGAGCCAGTGGAGC  
ATGCATGAAGGAGTCAGATGCTTCTTCGATTCTTTCCCTGGCGCAGCTGGGCCATCCTG  
GACTTGAACACAGAGACCTCGCCCGTGAAGTAATCATCGCACCTACGATCCAACCAATTG  
GGAGAGAATCAATAGATTCTTTTTCGGGGGCGATTATCCTTCCCGAACGAGCATACAA  
CTCTCCGTGTAGTGCCTCTCCAAGTGTGCTTGTTCACCTTCTTCTTACCATGGCA  
AGTATTTGTGAATAACTCCGATGAGAAGAAAAAGAGGCGTTAAGAGACCTCTCTGGCC  
CAACCCCTAGACACTCTAAGATCCTTTTTCAAACCTGCTCCCATTTTGAGTCAAGAGATAG  
ATAAATAGACACATCCCATTTGACTGATCGGGGGCGTTCTAGTACTGAGGGGGTCGA  
AGACCAAGAAGTGAGTTATTTATACCAAGCATTCTTCTATGGCTAGATCCAATCTCCTG  
GTCCCTGCGGAAAGGAAAAAGAAATTTACAGTTCCTTCTTCCGGAAGGGAGGATTAGGGA  
AATCCTATTGATGTCTGCTTTCTCCAGACCTCCGCGGGAAGCATGAAAAAAAAGGCT  
CGAATGGTACGATCCCTCCGTCAACCCAGAATGAAAGGGGTGATCTCGTAGTTCTTGGTC  
TGTGAAGATGCGTTGTAGTGCTTCATTTTCCCATTGAGGCCGAACCTAAACCTGTGCT  
CGAGAGATAGCTGTCCATACCTGATAGGGATGTATGGATTCTCGAGAAGAGAGGAGCC  
ATGGTGGTCCCCCGGACCGCCGGATCCACGAGTGAATAGAAAGTTGGATCTACATT  
GGATCTCACCTGAATCGCCCATCTATCTCCTGAGGAGAAGTTTGGTTTCAAACCTCCGG  
TTCGAACAGGAGGAGTACGCCATGTCTAATGTGCCTTGGATGATCCACATCCCCGGGTGAG  
GCGCTGATGAGCACATTGAACATATCCATGTGGCTGAGAGCCCTCACAGCCAGGCACAAC  
GAGCAATTATCAGGGCGCGCTCTACCACTGAGCTAATAGCCCTTGCGGGCCCCCAGC  
GGGAGGCCCGCTATGCCAAAAGCGAGAGAAAGCCCATCCCTCTCTTTTCTTTTTCGCGCC  
CCATGTCGCCACACGGGAGGGGATGGGGACGTAAAAAAGGGGATCCTATCAACTTGTTC  
CGACCTAGGATAATAAGTCTATGAGCTTGTCTTACTTCACCGTCGAGAAACGAAAGAGA  
CTTCCATCTCCAAGCTTAGCTCAGACGTAGCTCGCTTCTTTAGCTCTCCCTGAAAAGGAG  
GTGATCCAGCCGACCTTCAGTACGGCTACCTTGTACGACTTCACTCCAGTCACTAGC  
CCGCGCTTCGGCATCCCCCTCTTGCGGTTAAGGTAACGACTTCGGGCATAGCCAGCTCC  
CACAGTGTGACGGGCGGTGTGTACAAGGCCGGGAACGAATTCACCGCGTATGGCTGAC  
CGGCGATTACTAGCGATTCCGGCTTCATGCAGGCGAGTTGCAGCCTGCAATCCGAACCTTA  
GGACGGGTTTTTGGAGTTAGCTCACCTGGCGGGATCGCGACCCCTTTGTCCCGGCCATTG  
TAACACGTGTGTGCGCCAGGGCATAGGGGGCATGATGACTTGACGTATCTCACCTTCC  
TCCGGCTTATCACCGCGGCTGTGTTAGGGTTCCAAACTCAATGGTGGCAACTAAACACG  
AGGGTTGCGCTCGTTGCGGGACTTAACCAACACCTTACGGCACGAGCTGACGACAGCCA  
TGACACCACTGTGTCCGCGTTCCCGAAGGCACCCCTCTCTTTCAAGAGGATTACGGCAT  
GTCAAGCCCTGGTAAGGTTCTTCGCTTTGCATCGAATTAACACCATGCTCCACCGCTTG  
TGCGGGCCCCCGTCAATTCTTTGAGTTTCTTCTTGCACGTAATCTCCAGGCGGGAT  
ACTTAACGCGTTAGCTACAGCACTGCACGGGTGATACGCACAGCGCTAGTATCCATCG  
TTTACGGCTAGGACTACTGGGGTATCTAATCCCATTCGCTCCCTAGCTTTCTGCTCTCA  
GTGTCAGTGTGCGCCAGCAGGGTGCTTTCGCCGTTGGTGTTCTTTCCGATCTCTACGCA  
TTTCACCGCTCCACCGGAAATTCCTCTGCCCCACCGTACTCCAGCTGGTAGTTTCCA  
CCGCTGTCCAGGGTTGAGCCCTGGGATTTGACGGCGGACTTGAAAAGCCACCTACAGAC  
GCCTTACGCCCAATCTCCAGATAACGCTTGCATCTCTGTCTTACCGCGGCTGCTGGC  
ACAGAGTTAGCCGATGCTTATTCCTCAGATAACGTCATTGCTTCTTCCGGGAAAAGAA  
GTTACAGACCCGTGGGCTTCTACCTCCACGCGGCTTGTCTCGTCAAGGCTTTCGCCCCAT  
TGCGGAAAATTTCCCACTGCTGCTCCCGTAGGAGTCTGGGCGGTGTCTCAGTCCAGTG

TGGCTGATCATCTCTCGGACCAGCTACTGATCATCGCCTTGGTAAGCTATTGCCTCACC  
AACTAGCTAATCAGACGCAAGCCCCCTCTCGGGCAGATTCTCTCTTTTGCTCCTCAGCCT  
ACGGGGTATTAGCAGCCGTTTCCAGTTGTTGTTCCCTCCCAAGGGCAGGTTCTTACGCG  
TTACTCACCCGTCGCGCACTGGAAACACCACCTCCCGTCCGACTTGCATGTGTTAGGCAT  
GCCGCCAGCGTTCATCTGAGCCGGGATCGAACTCTCCATGAGATTCTAGTTGCATTAC  
TTACCAATCTTCCGGTTCGTAGACAAAGCTGATTCGGAATTGTCTTTTCATTCCAAGGCTT  
GTATCCATGCGCTTCATATTAGCCTGGAGTTTCGCTCCCAGCAATATAGCCATCCCTACCC  
TCTCACGTCAATCCCACGAGCCTCTTATCCATTCTCATTTCGATCACGGCGGGGAGCAAG  
TCAAAATAGAAAACTCACATTGCGTTGGGTTTAGGGATAATCAGGCTCGAACTGATGAC  
TTCCACCACGTCAAGGTGACACTCTACCGCTGAGTTATATCCCTTCCCTGCCCCATCGA  
GAAATAGAACTGACTAATCCTAAGGCAAAGGTCGAGAACTCAACGCCACTCTTCTGA  
ACAACTCGGAGCCGGGACTTCTTTTCGCACTATTACGGATACGAAAAGAAATGGAAAAATT  
GGATTCAATTGTCAACTGCTCCTATCGGAAATAGGATTGACTACGGATTTCGAGCCATAGC  
ACATGGTTTCATAAAATCCGTACGATTTTCCCGATCTAAATCGAGCAGGTTTACAGGAA  
GAAGATTTTGTTCAGCAATGTTCTATTTCGATACTGGTAGGAGAAGAACCCTGACTCGGATT  
GTTAAAAAAGAGAGGAAGCAGAACCAAGTCAAGATGATACGGATCAACCCCTTCTTCTT  
GCGCCAAAGATCTTACCATTTCGAAGGAACTGGAGCTACATCTCTTTCAATTTCCATT  
CAAGAGTCTTATGTGTTTCACGCCCCCTTTGAGACCTCGAAAAAGGACAAATTCCTTT  
TCTTAGGAACACATACAAGATTTCGTCACTACAAAAAGGATAATGGTAACCCC  
AACATTAACACTACTTCTGAAATTTAATAGTAATAGAAATACATGTCCTACCGAGACA  
GAATTTGTAACCTGCTATCCTCTTGCCTAGCAGGCAAAGATTGACCTCCGTGGAAAGACT  
GATTCATTTCGGATCGACATGAGGGTCCAACCTACATTGCATTGCCAGAATCCATTTGTATA  
TTTGAAACAGGTTGACCTCCTTCTCTCATGGTACAATCCTCTTCCCGCTGAGCCCC  
CCTTTCTCCTCGGTCCACAGAGACAAAAATGTAGGACTGGTGCCAACAGTTCATCACGGAA  
GAAAGGACTCACCGAGCCGGGATCACTAATACTAATAATAAGAAAAAGAACTGTCT  
TTTCTGTATACTTTCCCGCTCCGTTGCTACCGCGGGCCTTACGCAATCGATCGGATCAT  
ATAGATATCCCTTCAACACAACATAGGTCATCGAAAGGATCTCGGACGACCCGCCAAAGC  
ACGAAAGCCAGGATCTTTTCAGAAAATGGATTCTTATTCGAAGAGTGCATAACCGCATGGA  
TAAGCTTACCAACCCGTCAATTTGGGATCCAATTCGGGATTTTCTTGGGAGGTATCG  
GGAAGGAATTGGAATGTAATAATATCGATTCTACAGAAGAAAAGGTTCTCTATTGATTC  
AAACGCTGTACCTATGGGATAGAGGAAGAGGAAAAAACCGAAGATTTACATAGTACTTT  
TGATCGAAAAATCAATCGGATTTATTTTCGTACCCCTCGTTTCGATGAGAAAAATGGGTCAGA  
TTCTACAGGATCAAACCTATGGGACTTAAGGAATGATGGAAGGGAATAAAAAGAAAGAG  
AGGGAAAGAAAAATCGAAATAAAGAATCAAAGAAAAATAAATAAAAAATACAAAAATA  
AATAAAGATTCCAATGAACAAATTCAAACTCAAAAAGGATCTTCTGATTCTCGAAGAA  
TGAGGCGAAAGGATTGATCGAGAAAGATCTCTGTTCTTATTATAAGATCGTGATTTGA  
TCCGCATATTTTGGTAAAAAGATAATCTTCTCTTTGATCATAATCAAAAATGGAAGT  
GTTCAATTGGAACATGAGAACGTGACTGAATTGGTCTAGTTACTCTTCGGGACGGAGTG  
GAAGAAGGGAGGAGATTCTCGAACGAGGAAAAGGACCAATTACTTCGAAAGAAATTGAAC  
GAGGAGCCGTATGAGGTGAAAATCTCATGTACGGTTCTGTAGAGTGACAGTAAGGGTGAC  
TTATCTGTCAACTTTTCCACTATCACCCCCAAAAAACCAACTCTGCCTTACGTAAAGTT  
GCCAGAGTACGATTAACTCTGGAATTTGAAATCACTGCTTATATACCTGGTATTGGCCAT  
AATTCACAAGAACATTCTGTAGTCTTAGTAAGAGGAGGAAGGGTTAAGGATTTACCCGGT  
GTGAGATATCACATTGTTTCGAGGAACCTTAGATGCTGTTCGGAGTAAAGGATCGTCAACAA  
GGGCGTTCTAGTCGTTGTAGATTCTTATCAGAGCTGTATCATTGGATGATGCCATGT  
GAATCGCTAGAAACATGTGAAGTGTATGGCTAACCCAAATCACGAAAGTTTCGTAAGGGGA  
CTGGAGCAGGCTACCATGAGACAAAAGATCTTCTTTCTAAAGAGATTTCGATTTCGGAACATA  
TTATATGTCCAAGGTTCAATATTGAAATCATTTTCAGAGGTTTTCCCTTACTTTGTCCGTG  
TCAACAAACAATTTCGAAATACCTCGACTTTTTCAGAACAGGTCCGAGTCAAAATAGCAATG  
ATTCGAAGCACTCTTTTTTACACTATTTTCGGAACCCAAGGACTCGATCGTATGGATATG  
TAAATACAGGATTTCCAATCCTAGCAGGAAAAGGAGGGAAACGGCTACTCAATTTAAAG  
TGAGTAAACAGAATTCATACCTCGATTTTCATAGATACATATCAAATTCGTGGAAAGCCG  
TATTCGATGAAAGTCGTATGTACGGCTTGGAGGGAGATCTTTCATATCTTTCGAGATCCA  
CCCTACAATATGGGGTCAAAAAGCCAAAATAAGTGATTCGTTTTTAGCCCGTATAAAAAG  
AAAACGGATTCTTGAACCTCTTTCACGCTCATGTCACGTCGAGGTACTGCAGAAGAAAAA  
ACTGCAAAATCCGATCCAATTTATCGTAATCGATTAGTTAACATGTTGGTTAACCGTATT  
CTGAAACACGGAAAAAAATCATTGGCTTATCAAATTATCTATCAAGCCGTGAAAAAGATT  
CAACAAAAGACAGAAACAAATCCACTATCTGTTTACGTCAAGCAATACGTGGAGTAAC  
CCCGATATAGCAGTCAAGCAAGACGTGTAGGTGGATCGACTCATCAAGTTCTCTATTGAA  
ATAGAATCTACACAAGGAAAAGCACTTGCCATTCGTTGGTTATTAGGGGCATCCCGAAAA  
CGTCCGGGTGCAAAATATGGCTTCAAAATTAAGTTCCGAATTAGTGGATGCTGCCAAAGGG  
AGTGGCGATGCCATACGCAAAAAGGAAGAGACTCATAGAATGGCAGAGGCAAAATAGAGCT  
TTTGCACATTTTCGTTAATCCATGAACAGGATCTATATAGACATAGATCCGTGGATCC  
ATACATCTCGATCGGAAAAAGAAATCAATAGAAAAAGAAAGAAATGGAATGGATCGATATCT  
TTCTCGAAACAAACGAAAAGGAAAAAGAAAGATGAAACATAAATCATGGATCAACTAAGCC  
CTCTCGGGGGCTTCTTAAAGAATAAGAAGGAGGAATCTCATGGAAATACCATGGAATAAG

GTTTGATCCTGTTTCATGGGGATTCCGTAAATATCCCATTCCAAAAATCGAAAGTTCGAAA  
CAATTGGGACTTTTTTCGGAGATTGGATGCAGTTACTAATTCAGGATCTGGCATGTACAGA  
ATGAAAAC TTCATTCTCGATTCTACGAGAATTTTATGAAAGCGTTTCATTGCTTCTCT  
TCCATGGGAAGTTTCATTTTCCCAAGATGTATCCTCATTTTTGGCCTAATTCTCTTCTGA  
TGATCGATTCAACCTCTGATCAAAAAGATATACCTTGGTTATATTTTCATCTCTCAACAA  
GTTTAGTAATGAGCATAACGGCCCTATTGTTCCGATGGAGAGAAGAACCTATGATTAGCT  
TTTCGGGAAATTTCCAAACGAACAATTTCAACGAAATCTTTCAATTTCTATTTTACTAT  
GTTCAACTCTATGTATTCCTCTATCCGTAGAGTACATTGAATGTACAGAAATGGCTATAA  
CAGAGTTTTTGTATTTCGTATTAAACAGTACTCTAGGAGGAATGTTTTTATGTGGTGCTA  
ACGATTTAATAACTATCTTTGTAGCTCCAGAATCTTTTCAGTTTATGCTCCTACCTATATAT  
CTGGATATACCAAGAGAGATGTACGGTCTAATGAGGCTACTACGAAATATTTACTCATGG  
GTGGGGCAAGCTCTTCTATTCTGGTTTCATGGTTTCTCTGGCTATATGGTTTCATCCGGGG  
GAGAGATCGAGCTTCAAGAAATAGTGAATGGTCTTATCAATACACAAATGTATAACTCCC  
CAGGAATTTCCATTGCGCTTATATCCATCACTGTAGGAATTGGGTTCAAGCTTTCCCCAG  
CCCCTTCTCATCAATGGACTCCGACGTATACGAAGGAGTGCGGTTTCGTTTCGACAAATTC  
CTACCTCTATATCTATCTCTGAGATGTTTGGATTTTTCAAACTCCATGGACATGCAGAA  
GAGAAATGCTATCCCCACTCGGACCAAGACATAACTTTTACCAAAGTTTATTGTGATCT  
TTTTGTTCAAATAACAATTAAGGTGAAGCAGGGTCAGGAACACGAATCTCTTTATGATA  
AACAGATCCATTTTGCAAGTTCGTTATTACGGGTAGTTCCTACAAAGGATCGGACTAATG  
ACGTATACAATACTTGAATTATCGATGTAGATGCTACATAGTTGGTTTCATCCTTCAGA  
GACTACGAGTGTAATAGGAGCATCCGTCGACAAAAGGATCACCCCTAAGATGATCATCTCA  
TGGCTATTGAGAACGAATCAAATCAGATGGTTCTATTTCTCAATCTTTCTGACTTGTGCT  
CCTACGGAACCGGGGTCGAAAAGATTGAAAAGTCAGTCATTACAAACCACTGATGAAGG  
ATTCCTCGAAAAGTTAAGGATTAGTAATCCTTTTTAGAAAATCGAATGGATTGGTCTTAT  
ACATACGCGAGGAAGGTAATCAAAAAGAAAGAAGGTGAGTTCTTCTTTTCTTTTACT  
TAGGAGCCGTGCGAGATGAAAGTCTCATGCACGGTTTTGAATGAGAGAAAGAAGTGAGGA  
ATCCTCTTTTCGACTCTGACTCTCCCACTCCAGTCGTTGCTTTTCTTTCTGTTACTTCGA  
AAGTAGCTGCTTCAAGCTTCAGCCACTCGAATTTTCGATATTCTTTTTATTTCTCATCAA  
ACGAATGGCATCTTCTCTGGAATCCTAGCTATTCTTAGCATGATATTGGGGAAATCTCA  
TTGCTATTACTCAAACAAGCATGAAACGTATGCTTGCATATTTCGTCCATAGGTCAAATCG  
GATATGTAATTTATGGAATAATTGTTGGAGACTCAAATGATGGATATGCAAGCATGATAA  
CTTATATGCTGTTCTATATCTCCATGAATCTAGGAACCTTTGCTCGCATTGTCTCATTG  
GTCTACGTACCGAACTGATAACATTGAGATTATGCAGGATTATACACGAAAGATCCTT  
TTTTGGCTCTCTCTTACGCCCTATGTCTTATCCCTAGGAGGTCTTCTCCTCCACTAGCAG  
GTTTTTTCGAAAACCTCATCTATTCTGGTGTGGATGGCAGGCAGGCCTATATTTCTTGG  
TTTCAATAGGACTCCTTACGAGCGTTGTTTCTATCTACTATTATCTAAAAATAATCAAGT  
TATTAATGACTGGACGAACCAAGAAATAACCCCTCACGTGCGAAATATAGAAAGATCCC  
CCTTAAGATCAAACAATTCATCGAATTGAGTATGATTGTATGTGTGATAGCATCTACTA  
TACCAGGAATATCAATGAATCCAATTATGCAATTGCTCAGGATACCCCTCTTTTAGCTTC  
TAGGGTCTATTCTTAGTTCAAGATCCCTTTTACTAACTGGAATAAAAGAATTAGTAGAT  
CTGTTCCGCCCCAAAATGGGAATGGGCTGGGTTATGAACCTTATAATCATGGAATCGACTC  
GATCATCAGATTATAAGTTTCATTCCATACCGGACCAGACCGGAATAGGGTTATGTACATT  
CTCATTATGAGAAGGGGTCATTTCGAGCATATGTAAATAGAGACTATGTTTACATATGGAT  
CCCTACGTCGTTACATTCCATTTAGGATTAGGAATAGGCGTAATCGGACCTGCTTTTTAC  
ATATCTATCGTTATTTGGGTACCATATTAACCTCTTTGGGCTTCGATTGAATCGAGAAAT  
AGGTTTGATTGTACATCTTTTGATATATATAAGGTATCCTCCGGATAATTCAAATCGAA  
GCAATTTGATGTCCGACTCGGGCTATATGACATGACCGATCGATAGAAATACTCCAAA  
CTCCACCTTTGTCTATATATTCCATATATCACACTAGATAGATATCATATTCATGGAATAC  
GATTCACTTTCAAGATGCCTTGATGGTGAAATGGTAGACACGCGAGACTCAAATCTCGT  
GCTAAAGAGCGTGGAGGTTCGAGTCCTCTTCAAGGCATAATATTGAAATGCTCATTGAAT  
GAGCAATTCATAACAGATCTCGGATCTAATCAATATTGATATACATATACCAAGTATCT  
GTTGATACGAAGTATTCATCGATCCCCACGATCCGAGTCCGGGCTGTTGGAATTGGAAT  
AGGTTCCGCGACGGGATCAGAAATCTTGGCGATCTTCTCTATCTAATGAATGAGGAGTCC  
GTTTTGAAATCGTCCGCCCTGCACCCACCCCGAGTATATGCTTCAACAGGAATCACAC  
AAGGGTAAATTGATACAATAGAAACCTCTGGTAAAATGCCCGCCCGTAACCCAACAGATA  
AAGTACATAGTCCGTTTTAGCCTGTTACATGAATCAATGTTTCATTTTCATCCGGGAAAA  
GCCATCTCTTTCTCAACAATGCCTTTGTCATTTGATCCAATAGCGTTCCGTTAGATAGGA  
ACAGATTTGATAAATACTGATAACTCTCGGATGGAGTATTAGAACGGAAGATCCATAG  
ATAATGAATATTGGTTTGAAGCCATCTCTGGCGATGAATCAACAATTCGAAGTGCTTTT  
CTTGCGTATTCTTGATGAACCAGCGTTTATATATAGATGTAGGAGGATTGTTTGGGAAG  
TAATAAGCCCTTTTGACATCTCTTCATCTGCAAAGAATTCTCGGCGTGAAAACACAGAGA  
CAAAGGGCTGATCTTTGAATAGGAAAAAGAATGGATCTGCAGGGTCCCAATGAATTGGC  
TTATTCGAAAAAGCCTTGTTCTTTGGAAGATCTATCTCGTGTCTGGTACTGCATGGTTC  
CACTCTGCAAGAACTCCGAATCATTTCTTGAAGCTCATCCTCTTTATGATAAATGATCC  
GCTTGCCCCGAAATGACCTGGCCCAATAGGGAAATCCCAATTCATTGGTCCTTTTCGATAC  
AATCAATAGATTGCCACAAGGGCGCCATATTCTAGGAGCCCAAACTATGTGATTGAATA

AATCCTCCTCTATCTGTTGCGGGTCGAGGGCTCCTTCTCTTTCCCTTCTTCAAACCTCG  
ATTCGTATTTTTTCATATAGAAATCTCTGATCAACGATAGAACAAGATCCGTTTTGCATCA  
TATCTAACTGATTCCTTGGTTCGGACCGAAGAAGCAATGTCACTCGATCATTATCAAAC  
GACTGCAATCTTTTTCTGTCCGTGAGGATCCCAACAGAGCGCCTTCGACTTCTAATAGGC  
CATGAAC TAGATCAGAATCATTTCTCAACGAATCCATAAGAAGTGATCCAATTTTTTTCAT  
CGGGTCCGGGTGGAGACCAAAGATCTTGAGCGACCGATCCGGCAGAACAACTCAAAGAT  
AAAGAAGTATCGTTAATTTCTTCATGCTCGTTCGAAGTTCGAAGTACCATTTGTACAAAT  
AAGAATCCCCCTTCCTTACATGATTTCTTCTTCATATAGATAGATATAGGATCTATGGGGC  
AATTACTTAGAAGTACATTTTGTGCAACAGCCCTTCCTATCTGATAGAAAAGGATCCCAT  
GATCCTGAACCGATCTTACCTGGGATCGCAAAATCCCAAGTTTGTCTATGAAGAGCTGATC  
TAATTGTATTAGTGTCTATAATTGATTTCTTCTGTGTAATACTAATTGATAGGGCCTCAT  
TGGTAAGTGCTACAAGATCTCGTGCAATTGGAACCCATGGTTATGGACCCGAATCTGTTAC  
TGTTAGTATGGAACATTTTCTTTTCCAAGTGAAATCCCTAGTATATGAAAGAATGAAAA  
AGTGCTTTTCGTTGTTGTGGAATAAGAAGCCTTCGTATCTTAATGCATGTATTTAATTTAT  
TCGGAGCTATTAGAGTGGGATCCACTTTTGGGGAATATGAGTCAAGCAATAACAAGAA  
TATTTCTAGTGGAACTCTTTCACTATCTCTGGAGAGATAGTTCATAATAGACCGAGGG  
ATAAGTAATTCGACTCATTCACATACAGATCATGAATGTTTGAATCCATATTATGCAAG  
GGGACATTGCTTTTGCTAATTCTAATTGAAGGGTGGTATCAATCGGTCTATTTTCGGCG  
TCATATACATAGTTAGCACATTCGTCATAGTTAGCAGCTCCGTATCAAGGTCATCATCAA  
TATCGTCACTATCATCAATATCGATATCGTCACTATCATCAATATCGATATCGTCAATAA  
GATAACCTTTAGGCTTGTCAATCCAGGAACCTTGTTCGGAATACCGTAATGAAGGAACAT  
AGGAGTTTGTGCTAGGTATTTGACCAAATAGGATCGTCCAGTTCCCTATAGAACCTATCA  
CTAAAAATACCCCTAGAAAGGGATAGGGCTAAGCGGAGCGAAAAGGGTTTCCATGAGATG  
GGAAATGAGAACTATTAGCCCCACACGAGGTTTGTGAATAAGTGATTGTCTGATAATGAG  
CAAGGAATATCCGTCTTTCTGCTAAACAGGATCTATTGAATCATAATTCATTAGATACT  
TTTTATGAATGTCAACTAAGTATCGTAAGTAATGGATCCCGGTTGTTCAATCATTGAT  
AACCAGAGTCATTCTTTGATAAACGATCACTATGAGTCAGACTCAATAGAATTTGATCAA  
TCCTTTTTTCCGTGCTTAAGGTGGAGAACTGAACCAAGAATTCCTTTCTTCATCATCAA  
TCGAATCACTGTTTCGCGACCCAGGATTCATTTTATCATCAATCCAATCACCGTTCACGT  
TTTTTCTTTTCTTATCAATGAATAGATCTCTTTACTTGTACGACTTAGATGTCTCGTAT  
TTCTCGAAAAAGTGATTGATTGATGGGATTTGGTATGATACTGATGAGATCGATGAGAT  
TGATATTCAAATATTTCTTCTTAGAACGTATTGATTTGACCCATAAGCGGGACCACCAC  
CCAATAGCATGTTGCCGCCAGAAGCAGAATCCCGTATTTCTTCCAGAGAATCTCCTAATT  
GTTCAGAGCAACTAGAAAGAGATTCTTTAACCAGAAAGAATTCAGTTCAGATGTAGGAT  
ACCTATCCAGAAGTTTTCGCAACTCAATCATGTATGATGGAATCATCAAAGATTTGATCT  
TTTCTAACTCTGTCTGTAACCTCACTAGAGGCTCGGAAAACAAAGAGAAGATGTGTACGAA  
CGAGATATCCAGCAACAAGAAGGAAAAAGAAATTGAATAGAGGAACTCCCAAGCATTTG  
GTGATCTCAGATGTGTCCATATCAATGGAATGGGTGACTCATTATTTTCGATGAATCATTT  
CTTCGGACAGAAGAAGATTCTGTAAACACTTACTCGAACTCTCACTTATCAGATTCGGTT  
GTGGAAGAATCGACCACCACTTTTCTGAGGAATTGGCCATGATATATCTGATCCATGCA  
TAATATCATGAAAAACGACACAAAATTTGACTGCCACTTAGGGAATATTGAAAGGGAA  
TATTCATATCAAATAAATATTGTTTTTAAGGTGAAATAAAGATATTACACCCCGTCC  
AAGT

**Supplementary Table S6. Cinnamomum primers**

Cinna\_140\_cp1F: GGAAACCAAATTGGAGATCAA  
Cinna\_140\_cp1R: AAAGCTTTCCCCTATTTTCTATTG

Cincas\_290\_cp1F: CGGATCAAGATACCCATTCTG  
Cincas\_290\_cp1R: GGAATCCGTCCTGCCATTA

Cincas\_216\_cp2F: TCCCTTCATCACATGATTCTG  
Cincas\_216\_cp2R: ACATAGGGGCTCATTCAGGA

Cinbur\_158\_cp1F: TCACAGTCATTAATGCTTCCAA  
Cinbur\_158\_cp1R: TTGATTGGATCCTGTTGTTCTC

Cinbur\_129\_cp2F: CCCCAGAGTTACATCGAC  
Cinbur\_129\_cp2R: TTCTGAACCCAGCTCACGTA

### Supplementary Table S7. Amplicon sequences for Cincas\_216

>CB1\_Cinnamomum-burmannii\_Cincas-216  
atgaaataccttgatctatatcggattggtacatgtatcaatcaaccaagcgaatctcgtccggatgaa  
tcaataaaagcaaagcaattagggcgcgtccctgaaacaattcattgcattgatatttctcaaatatcaat  
aactaaaacttcctaggtaaatcaaattttattgt

>CB2\_Cinnamomum-burmannii\_Cincas-216  
atgaaataccttgatctatatcggattggtacatgtatcaatcaaccaagcgaatctcgtccggatgaa  
tcaataaaagcaaagcaattagggcgcgtccctgaaacaattcattgcattgatatttctcaaatatcaat  
aactaaaacttcctaggtaaatcaaattttattgt

>CB3\_Cinnamomum-burmannii\_Cincas-216  
atgaaataccttgatctatatcggattggtacatgtatcaatcaaccaagcgaatctcgtccggatgaa  
tcaataaaagcaaagcaattagggcgcgtccctgaaacaattcattgcattgatatttctcaaatatcaat  
aactaaaacttcctaggtaaatcaaattttattgt

>CB4\_Cinnamomum-burmannii\_Cincas-216  
atgaaataccttgatctatatcggattggtacatgtatcaatcaaccaagcgaatctcgtccggatgaa  
tcaataaaagcaaagcaattagggcgcgtccctgaaacaattcattgcattgatatttctcaaatatcaat  
aactaaaacttcctaggtaaatcaaattttattgt

>FC96\_Cinnamomum-burmannii\_Cincas-216  
atgaaataycttgatctatatcgrattggtacatgtatcaatcaaccaagygaatctcgtccggatgar  
tcaataaaagcaaagcaattaggmgcgkccctgaaacaattcattgcattgatatttctcaaatatmaat  
aactaaaacttcctaggtaaatmaaattttmttgt

>FC111\_Cinnamomum-burmannii\_Cincas-216  
atgaaataycttgatctatatcgrattggtacatgtatcaatcaaccaagygaatctcgtccggatgar  
tcaataaaagcaaagcaattaggmgcgkccctgaaacaattcattgcattgatatttctcaaatatmaat  
aactaaaacttcctaggtaaatmaaattttmttgt

>FC144\_Cinnamomum-burmannii\_Cincas-216  
atgaaataycttgatctatatcgrattggtacatgtatcaatcaaccaagygaatctcgtccggatgar  
tcaataaaagcaaagcaattaggmgcgkccctgaaacaattcattgcattgatatttctcaaatatmaat  
aactaaaacttcctaggtaaatmaaattttmttgt

>CC1\_Cinnamomum-cassia\_Cincas-216  
atgaaataccttgatctatatcggattggtacatgtatcaatcaaccaagcgaatctcgtccggatgaa  
tcaataaaagcaaagcaattaggagcgtccctgaaacaattcattgcattgatatttctcaaatatcaat  
aactaaaacttcctaggtaaataaaaattttattgt

>CC2\_Cinnamomum-cassia\_Cincas-216  
atgaaataccttgatctatatcggattggtacatgtatcaatcaaccaagcgaatctcgtccggatgaa  
tcaataaaagcaaagcaattaggagcgtccctgaaacaattcattgcattgatatttctcaaatatcaat  
aactaaaacttcctaggtaaataaaaattttattgt

>CC3\_Cinnamomum-cassia\_Cincas-216  
atgaaataccttgatctatatcggattggtacatgtatcaatcaaccaagcgaatctcgtccggatgaa  
tcaataaaagcaaagcaattaggagcgtccctgaaacaattcattgcattgatatttctcaaatatcaat  
aactaaaacttcctaggtaaataaaaattttattgt

>CC4\_Cinnamomum-cassia\_Cincas-216  
atgaaataccttgatctatatcggattggtacatgtatcaatcaaccaagcgaatctcgtccggatgaa  
tcaataaaagcaaagcaattaggagcgtccctgaaacaattcattgcattgatatttctcaaatatcaat  
aactaaaacttcctaggtaaataaaaattttattgt

>379NW\_Cinnamomum-cassia\_Cincas-216

atgaaataycttggatctatatcgrattggtacatgtatcaatcaaccaagygaatctcgtccggatgaa  
tcaataaaagcaaagcaattaggagcgtccctgaaacaattcattgcattgatatttctcaaatatcaat  
aactaaaacttcctaggtaaataaaattttattgt  
>CV1\_Cinnamomum-verum\_Cincas-216  
atgaaataccttggatctatatcggattggtacatgtatcaatcaaccaagcgaatctcgtccggatgaa  
tcaataaaagcaaagcaattaggagcgtccctgaaacaattcattgcattgatatttctcaaatatcaat  
aactaaaacttcctaggtaaatcaaattttattgt  
>CV2\_Cinnamomum-verum\_Cincas-216  
atgaaataycttggatctatatcggattggtacatgtatcaatcaaccaagcgaatctcgtccggatgaa  
tcaataaaagcaaagcaattaggagcgtccctgaaacaattcattgcattgatatttctcaaatatcaat  
aactaaaacttcctaggtaaatcaaattttattgt  
>CV3\_Cinnamomum-verum\_Cincas-216  
atgaaataycttggatctatatcggattggtacatgtatcaatcaaccaagcgaatctcgtccggatgaa  
tcaataaaagcaaagcaattaggagcgtccctgaaacaattcattgcattgatatttctcaaatatcaat  
aactaaaacttcctaggtaaatcaaattttmttgt  
>CV17\_Cinnamomum-verum\_Cincas-216  
atgaaataccttggatctatatcggattggtacatgtatcaatcaaccaagcgaatctcgtccggatgaa  
tcaataaaagcaaagcaattaggagcgtccctgaaacaattcattgcattgatatttctcaaatatcaat  
aactaaaacttcctaggtaaatcaaattttattgt  
>CV46\_Cinnamomum-verum\_Cincas-216  
atgaaatacctgggatctatatcggattggtacatgtatcaatcaaccaagcgaatctcgtccggatgaa  
tcaataaaagcaaagcaattaggagcgtccctgaaacaattcattgcattgatatttctcaaatatcaat  
aactaaaacttcctaggtaaatcaaattttattgt  
>2USP\_Cinnamomum-verum\_Cincas-216  
atgaaataycttggatctatatcggattggtacatgtatcaatcaaccaagcgaatctcgtccggatgaa  
tcaataaaagcaaagcaattaggagcgtccctgaaacaattcattgcattgatatttctcaaatatcaat  
aactaaaacttcctaggtaaatcaaattttattgt  
>10USP\_Cinnamomum-verum\_Cincas-216  
atgaaataccttggatctatatcggattggtacatgtatcaatcaaccaagcgaatctcgtccggatgaa  
tcaataaaagcaaagcaattaggagcgtccctgaaacaattcattgcattgatatttctcaaatatcaat  
aactaaaacttcctaggtaaatcaaattttattgt  
>3ING\_Cinnamomum-verum\_Cincas-216  
atgaaataccttggatctatatcggattggtacatgtatcaatcaaccaagcgaatctcgtccggatgaa  
tcaataaaagcaaagcaattaggagcgtccctgaaacaattcattgcattgatatttctcaaatatcaat  
aactaaaacttcctaggtaaatcaaattttattgt  
>VS3\_Cinnamomum-verum\_Cincas-216  
atgaaataycttggatctatatcggattggtacatgtatcaatcaaccaagygaatctcgtccggatgaa  
tcaataaaagcaaagcaattaggagcgtccctgaaacaattcattgcattgatatttctcaaatatmaat  
aactaaaacttcctaggtaaatcaaattttmttgt  
>VS23\_Cinnamomum-verum\_Cincas-216  
atgaaataycttggatctatatcgrattggtacatgtatcaatcaaccaagygaatctcgtccggatgaa  
tcaataaaagcaaagcaattaggagcgtccctgaaacaattcattgcattgatatttctcaaatatmaat  
aactaaaacttcctaggtaaatcaaattttmttgt

### Supplementary Table S8. Amplicon sequences for Cincas\_290

>CB1\_Cinnamomum-burmannii\_Cincas-290  
ctccagtataaatagtaactatctgttcttccaccgtgagaggggctgattgggattgtttgagcaactc  
gcgcaatcggttgacctcttgccaattgattctgagtggtttatcgagatcagaagcgaattgtgcaaag  
gcttctaactctgcgaattgagccagttccagtttcgatttgccggctacttgtttcatggcctttaattt  
gagctgcag

>CB2\_Cinnamomum-burmannii\_Cincas-290  
ctccagtataaatagtaactatctgttcttccaccgtgagaggggctgattgggattgtttgagcaactc  
gcgcaatcggttgacctcttgccaattgattctgagtggtttatcgagatcagaagcgaattgtgcaaag  
gcttctaactctgcgaattgagccagttccagtttcgatttgccggctacttgtttcatggcctttaattt  
gagctgcagatc

>CB3\_Cinnamomum-burmannii\_Cincas-290  
ctccagtataaatagtaactatctgttcttccaccgtgagaggggctgattgggattgtttgagcaactc  
gcgcaatcggttgacctcttgccaattgattctgagtggtttatcgagatcagaagcgaattgtgcaaag  
gcttctaactctgcgaattgagccagttccagtttcgatttgccggctacttgtttcatggcctttaattt  
gagctgcagatcctactctcgagacagaaatacccacat

>CB4\_Cinnamomum-burmannii\_Cincas-290  
ctccagtataaatagtaactatctgttcttccaccgtgagaggggctgattgggattgtttgagcaactc  
gcgcaatcggttgacctcttgccaattgattctgagtggtttatcgagatcagaagcgaattgtgcaaag  
gcttctaactctgcgaattgagccagttccagtttcgatttgccggctacttgtttcatggcctttaattt  
gagctgcagatcctactctcgagacagaaatacccacat

>FC96\_Cinnamomum-burmannii\_Cincas-290  
ctccrgyataaatagtmactatmtgttcttccaccgtgaraggggctgattgggattgtttgagcaactc  
rcgcaatcggttgacctcttgccaattgattctgagtggtttatcgagatcagaagcgaattgtgcaaag  
gcttctaactctgcgaattgagccagttccagtttsgatttgccrgctacttgtttcatggcctttmattt  
gagctgcagatcctactctcgaracagaaatacccawt

>FC111\_Cinnamomum-burmannii\_Cincas-290  
ctccagtataaatagtmactatmtgttcttccaccgtgaraggggctgattgggattgtttgagcaactc  
rcgyaatcggttgacctcttgccaattgattctgagtggtttatcgagatcagaagcgaattgtgcaaag  
gcttctaactctgcgaattgagccagttccartttsgatttgccggctacttgtttcatggcctttmattt  
gagctgcagatcctactctcgaracagaaatacccacat

>FC144\_Cinnamomum-burmannii\_Cincas-290  
ctccrgyataaatagtmactatmtgttcttccaccgtgaraggggctgattgggattgtttgagcaactc  
rcgcaatcggttgacctcttgccaattgattctgagtggtttatcgagatcagaagcgaattgtgcaaag  
gcttctaactctgcgaattgagccagttccartttsgatttgccrgctacttgtttcatggcctttaattt  
gagcygcagatcctactctcgaracagaaatacccacat

>CC1\_Cinnamomum-cassia\_Cinnamomum-cassia\_Cincas-290  
ctccagtataaatagtcactatctgttcttccaccgtgagaggggctgattgggattgtttgagcaactc  
gcgcaatcggttgacctcttgccaattgattctgagtggtttatcgagatcagaagcgaattgtgcaaag  
gcttctaactctgcgaattgagccagttccagtttcgatttgccggctacttgtttcatggcctttaattt  
gagctgcagatcctactctcgagacagaaatacccacat

>CC2\_Cinnamomum-cassia\_Cincas-290  
ctccagtataaatagtcactatctgttcttccaccgtgagaggggctgattgggattgtttgagcaactc  
gcgcaatcggttgacctcttgccaattgattctgagtggtttatcgagatcagaagcgaattgtgcaaag  
gcttctaactctgcgaattgagccagttccagtttcgatttgccggctacttgtttcatggcctttaattt  
gagctgcagatcctactctcgagacagaaatacccacat

>CC3\_Cinnamomum-cassia\_Cincas-290

ctccagtataaatagtcactatctgttcttccaccgtgagaggggctgattgggattgtttgagcaactc  
gcgcaatcgttgacctcttgccaattgattctgagtggctttatcgagatcagaagcgaattgtgcaaag  
gcttctaactctgcgaattgagccagttccagtttcgatttgccggctacttgtttcatggctttaattt  
gagctgcagatcctactctcgagacagaaatacccacat

>CC4\_Cinnamomum-cassia\_Cincas-290

ctccagtataaatagtcactatctgttcttccaccgtgagaggggctgattgggattgtttgagcaactc  
gcgcaatcgttgacctcttgccaattgattctgagtggctttatcgagatcagaagcgaattgtgcaaag  
gcttctaactctgcgaattgagccagttccagtttcgatttgccggctacttgtttcatggctttaattt  
gagctgcagatcctactctcgagacagaaatacccacat

>379NW\_Cinnamomum-cassia\_Cincas-290

ctccagtataaatagtmactatctgttcttccaccgtgagaggggctgattgggattgtttgagcaactc  
gcgcaatcgttgacctcttgccaattgattctgagtggctttatcgagatcagaagcgaattgtgcaaag  
gcttctaactctgcgaattgagccagttccagtttcgatttgccggctacttgtttcatggctttaattt  
gagctgcagatcctactctcgagacagaaatacccacat

>CV1\_Cinnamomum-verum\_Cincas-290

ctccagtataaatagtaactatctgttcttccaccgtgagaggggctgattgggattgtttgagcaactc  
gcgcaatcgttgacctcttgccaattgattctgagtggctttatcgagatcagaagcgaattgtgcaaag  
gcttctaactctgcgaattgagccagttccagtttcgatttgccggctacttgtttcatggctttaattt  
gagctgcagatcctactctcgagacagaaatacccacat

>CV2\_Cinnamomum-verum\_Cincas-290

ctccagtataaatagtaactatctgttcttccaccgtgagaggggctgattgggattgtttgagcaactc  
gcgcaatcgttgacctcttgccaattgattctgagtggctttatcgagatcagaagcgaattgtgcaaag  
gcttctaactctgcgaattgagccagttccagtttsgatttgccggctacttgtttcatggctttaattt  
gagctgcagatcctactctcgagacagaaatacccacat

>CV3\_Cinnamomum-verum\_Cincas-290

ctccagtataaatagtaactatctgttcttccaccgtgagaggggctgattgggattgtttgagcaactc  
gcgcaatcgttgacctcttgccaattgattctgagtggctttatcgagatcagaagcgaattgtgcaaag  
gcttctaactctgcgaattgagccagttccagtttsgatttgccggctacttgtttcatggctttaattt  
gagctgcagatcctactctcgagacagaaatacccacat

>CV17\_Cinnamomum-verum\_Cincas-290

ctccagtataaatagtaactatctgttcttccaccgtgagaggggctgattgggattgtttgagcaactc  
gcgcaatcgttgacctcttgccaattgattctgagtggctttatcgagatcagaagcgaattgtgcaaag  
gcttctaactctgcgaattgagccagttccagtttcgatttgccggctacttgtttcatggctttaattt  
gagctgcagatcctactctcgagacagaaatacccacat

>CV46\_Cinnamomum-verum\_Cincas-290

ctccagtataaatagtaactatctgttcttccaccgtgagaggggctgattgggattgtttgagcaactc  
gcgcaatcgttgacctcttgccaattgattctgagtggctttatcgagatcagaagcgaattgtgcaaag  
gcttctaactctgcgaattgagccagttccagtttcgatttgccggctacttgtttcatggctttaattt  
gagctgcagatcctactctcgagacagaaatacccacat

>2USP\_Cinnamomum-verum\_Cincas-290

ctccagtataaatagtaactatctgttcttccaccgtgagaggggctgattgggattgtttgagcaactc  
gcgcaatcgttgacctcttgccaattgattctgagtggctttatcgagatcagaagcgaattgtgcaaag  
gcttctaactctgcgaattgagccagttccagtttcgatttgccggctacttgtttcatggctttaattt  
gagctgcagatcctactctcgagacagaaatacccacat

>10USP\_Cinnamomum-verum\_Cincas-290

ctccagtataaatagtaactatctgttcttccaccgtgagaggggctgattgggattgtttgagcaactc  
gcgcaatcgttgacctcttgccaattgattctgagtggctttatcgagatcagaagcgaattgtgcaaag

gcttctaactctgcgaattgagccagttccagtttcgatttgccggctacttgtttcattggcctttaattt  
gagctgcagatcctactctcgagacagaaatacccat

>3ING\_Cinnamomum-verum\_Cincas-290

ctccagtataaatagtaactatctgttcttccaccgtgagaggggctgattgggattgtttgagcaactc  
gcgcaatcgttgacctcttgccaattgattctgagtggctttatcgagatcagaagcgaattgtgcaaag  
gcttctaactctgcgaattgagccagttccagtttcgatttgccggctacttgtttcattggcctttaattt  
gagctgcagatcctactctcgagacagaaatacccat

>VS3\_Cinnamomum-verum\_Cincas-290

ctccagtataaatagtaactatctgttcttccaccgtgagaggggctgattgggattgtttgagcaactc  
gcgcaatcgttgacctcttgccaattgattctgagtggctttatcgagatcagaagcgaattgtgcaaag  
gcttctaactctgcgaattgagccagttccagtttcgatttgccggctacttgtttcattggcctttaattt  
gagctgcagatcctactctcgagacagaaatacccat

>VS23\_Cinnamomum-verum\_Cincas-290

ctccagtataaatagtaactatctgttcttccaccgtgaraggggctgattgggattgtttgagcaactc  
gcgcaatcgttgacctcttgccaattgattctgagtggctttatcgagatcagaagcgaattgtgcaaag  
gcttctaactctgcgaattgagccagttccagtttsgatttgccggctacttgtttcattggcctttaattt  
gagctgcagatcctactctsgagacagaaatacccat

**Supplementary Table S9** Genbank accession numbers

|    | Species                                           | Sample Accession | GenBank Accessions |
|----|---------------------------------------------------|------------------|--------------------|
| 1  | <i>Cinnamomum burmannii</i> (Nees & T.Nees) Blume | BRM1531          | In progress        |
| 2  | <i>Cinnamomum burmannii</i> (Nees & T.Nees) Blume | BRM1532          | In progress        |
| 3  | <i>Cinnamomum burmannii</i> (Nees & T.Nees) Blume | BRM1533          | In progress        |
| 4  | <i>Cinnamomum burmannii</i> (Nees & T.Nees) Blume | BRM1534          | In progress        |
| 5  | <i>Cinnamomum burmannii</i> (Nees & T.Nees) Blume | FC96             | In progress        |
| 6  | <i>Cinnamomum burmannii</i> (Nees & T.Nees) Blume | FC111            | In progress        |
| 7  | <i>Cinnamomum burmannii</i> (Nees & T.Nees) Blume | FC144            | In progress        |
| 8  | <i>Cinnamomum cassia</i> (L.) J. Presl            | BRM1535          | In progress        |
| 9  | <i>Cinnamomum cassia</i> (L.) J. Presl            | BRM1536          | In progress        |
| 10 | <i>Cinnamomum cassia</i> (L.) J. Presl            | BRM1537          | In progress        |
| 11 | <i>Cinnamomum cassia</i> (L.) J. Presl            | BRM1538          | In progress        |
| 12 | <i>Cinnamomum cassia</i> (L.) J. Presl            | 379NW            | In progress        |
| 13 | <i>Cinnamomum verum</i> J. Presl                  | BRM1547          | In progress        |
| 14 | <i>Cinnamomum verum</i> J. Presl                  | BRM1548          | In progress        |
| 15 | <i>Cinnamomum verum</i> J. Presl                  | BRM1549          | In progress        |
| 16 | <i>Cinnamomum verum</i> J. Presl                  | BRM1550          | In progress        |
| 17 | <i>Cinnamomum verum</i> J. Presl                  | BRM1551          | In progress        |
| 18 | <i>Cinnamomum verum</i> J. Presl                  | VS3              | In progress        |
| 19 | <i>Cinnamomum verum</i> J. Presl                  | VS23             | In progress        |
| 20 | <i>Cinnamomum verum</i> J. Presl                  | 2USP             | In progress        |
| 21 | <i>Cinnamomum verum</i> J. Presl                  | 10USP            | In progress        |
| 22 | <i>Cinnamomum verum</i> J. Presl                  | 3ING             | In progress        |

**Supplemental Table S10:** Chemical shift details for the 16 bioactive molecules assigned using structural elucidation of proton structure within cinnamon NMR spectra.

| SNO | Metabolite             | <sup>1</sup> H Multiplicity            |
|-----|------------------------|----------------------------------------|
| 1   | Cinnamaldehyde         | 9.66 (d), 7.46 (d), 6.80-6.74 (dd)     |
| 2   | Coumarin               | 6.46 (d)                               |
| 3   | Methoxy cinnamaldehyde | 9.62(d), 7.66 (d), 3.83 (s)            |
| 4   | Cinnamic Acid          | 7.95 (t), 7.58 (t), 6.50-6.51 (dd)     |
| 5   | Benzoic Acid           | 8.12 (dd), 7.66 (t), 7.44 (d)          |
| 6   | Methyl Salicylate      | 7.58 (d), 7.08 (d), 3.93 (d), 3.79 (d) |
| 7   | Quinic Acid            | 4.06-4.03 (m)                          |
| 8   | Eugenol                | 5.88-5.98 (m)                          |
| 9   | α-glucose              | 5.12 (d)                               |
| 10  | β-glucose              | 4.49 (d)                               |
| 11  | Fructose               | 4.0 (d)                                |
| 12  | Formic acid            | 8.23 (s)                               |
| 13  | Choline                | 3.22 (s)                               |
| 14  | Shikimic Acid          | 2.79 (t)                               |
| 15  | Succinic acid          | 2.15 (s)                               |
| 16  | Alanine                | 1.61 (d)                               |
